# Supplementary material for: Integrated analysis of mRNA and miRNA expression in HeLa cells expressing low levels of Nucleolin
Source: PubMed Central journal article supplement (PMC5567140; doi:10.1038/s41598-017-09353-4), 2017-08-21
Supplement: 41598_2017_9353_MOESM1_ESM.pdf [file 41598_2017_9353_MOESM1_ESM.pdf]

# **Integrated analysis of mRNA and miRNA expression in HeLa cells expressing low levels of Nucleolin**

Sanjeev Kumar<sup>3,5</sup>, Elizabeth Cruz Gomez<sup>1</sup>, Mounira Chalabi-Dchar<sup>1</sup>, Cong Rong<sup>2</sup>, Sadhan Das<sup>2</sup>, Iva Ugrinova<sup>4</sup>, Xavier Gaume<sup>2</sup>, Karine Monier<sup>1</sup>, Fabien Mongelard<sup>1,2</sup>, and Philippe Bouvet<sup>1,2,5</sup>

<sup>1</sup>Université de Lyon, Centre de Recherche en Cancérologie de Lyon, Cancer Cell Plasticity Department, UMR INSERM 1052 CNRS 5286, Centre Léon Bérard, Lyon, France.

<sup>2</sup> Université de Lyon, Ecole Normale Supérieure de Lyon, Lyon, France.

<sup>3</sup> BioCOS Life Sciences Private Limited,  
AECS Layout, B-Block, Singasandra Hosur Road SAAMI Building, 851/A, 3rd Floor,  
Bengaluru, Karnataka India

<sup>4</sup>Institute of Molecular Biology "Acad. Roumen Tsanev" Bulgarian Academy of Sciences "Acad. G Bonchev str. bl. 21, 1113 Sofia, Bulgaria

<sup>5</sup>Corresponding authors

[Philippe.bouvet@ens-lyon.fr](mailto:Philippe.bouvet@ens-lyon.fr)

[sanjeev@biocosls.in](mailto:sanjeev@biocosls.in)

Supplementary Figure 1:

KS statistics based enriched mRNA-pathways/GOBP.

S1A: For down regulated genes and S1B- for up regulated genes. The green (in S1A) or Red (S1B) shows the gene enriched in the corresponding pathway. The top panel shows the FC for the corresponding genes and the left panel shows the p-values of the enriched pathways/GOBP. p.4

Supplementary Figure 2:

KS statistics based enriched mRNA-miRNA. S2A: For down regulated genes and S2B- for up regulated genes. The green (in S2A) or Red (S2B) shows the gene enriched in the corresponding miRNA as target. The top panel shows the FC for the corresponding miRNA and the left panel shows the FC of the enriched target genes which is also differentially expressed. (U) refers to up regulated miRNA and (D) to down regulated miRNA. p.5

Supplementary Figure 3A:

Detailed Networks of the Differentially expressed and KS statistics based enriched mRNA-miRNA functional interaction p.6

Supplementary Figure 3B:

Sub network from S3A p.7

Supplementary Figure 3C:

Detailed Network of the Differentially expressed and KS statistics based enriched mRNA-miRNA functional interaction and the cholesterol/lipid pathways associations including the mir 17 Cluster. p.8

Supplementary Table 1:

The raw data: probeID- gene names- expression file see separate excel file

Supplementary Table 2.1:

List of the 925 and 764 genes that were down- and up-regulated respectively upon NCL depletion. p. 9

Supplementary Table 2.2:

Enriched pathways and GO BP terms for down regulated genes p. 29

Supplementary Table 2.3:

Enriched pathways and GO BP terms for Up regulated genes p. 31

Supplementary Table 3:

Raw data of miRNA expression. p. 45

Supplementary Table 4:

Up and down regulated miRNAs p. 65

|                                                                                                                               |       |
|-------------------------------------------------------------------------------------------------------------------------------|-------|
| <u>Supplementary Table 5:</u><br>Pathways and GOBP databases used in Enrichment in Fig.1A                                     | p. 68 |
| <u>Supplementary Table 6:</u><br>Resources used to compile miRNA targets data                                                 | p. 69 |
| <u>Supplementary Table 7.1:</u><br>Literature evidence of the target genes for the miRNA in supplementary Figs S2A<br>and S2B | p. 70 |
| <u>Supplementary Table 7.2:</u><br>Comparison with Tarbase miRNA/Target genes of supplementary Figs S2A<br>and S2B.           | p. 87 |

S1A

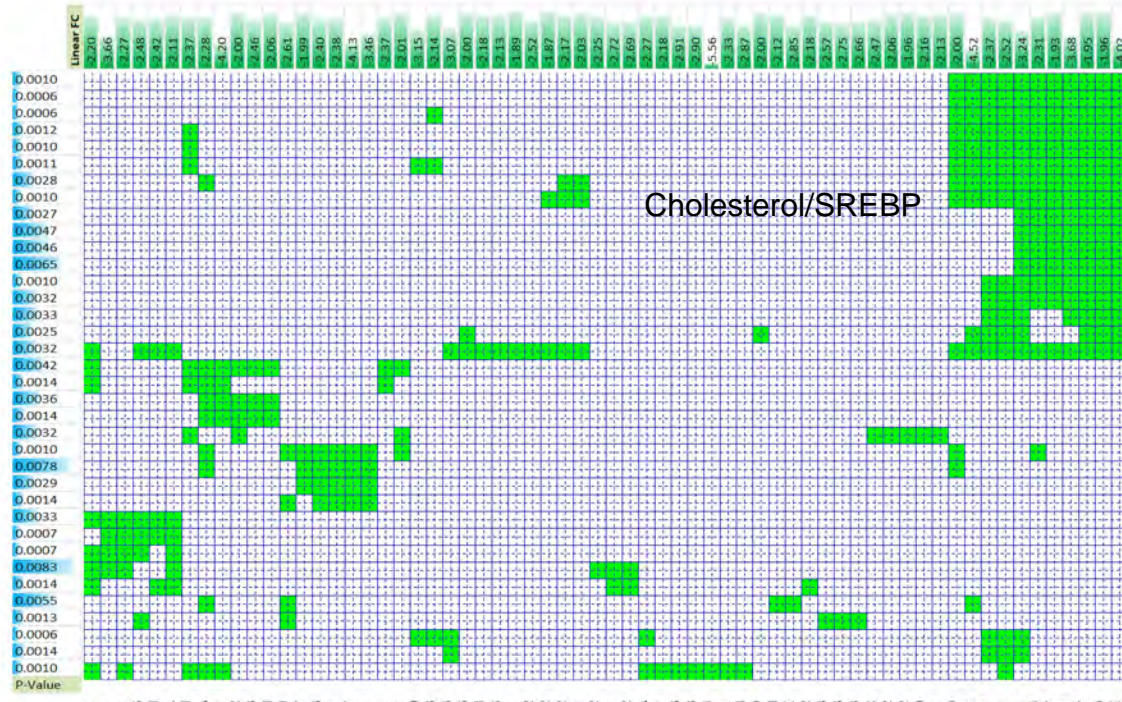

Cholesterol/SREBP

- STEROL BIOSYNTHETIC PROCESS
- CHOLESTEROL BIOSYNTHETIC PROCESS
- STERIOD BIOSYNTHETIC PROCESS
- CHOLESTEROL METABOLIC PROCESS
- STERIOD METABOLIC PROCESS
- CHOLESTEROL METABOLIC PROCESS
- ORGANIC HYDROXY COMPOUND BIOSYNTHETIC PROCESS
- ALCOHOL BIOSYNTHETIC PROCESS
- CHOLESTEROL BIOSYNTHESIS II
- CHOLESTEROL BIOSYNTHESIS III
- CHOLESTEROL BIOSYNTHESIS I
- STERIOD BIOSYNTHESIS
- CHOLESTEROL BIOSYNTHESIS
- SUPERPATHWAY OF CHOLESTEROL BIOSYNTHESIS
- CHOLESTEROL BIOSYNTHESIS
- REGULATION OF CHOLESTEROL BIOSYNTHESIS BY SREBP
- SMALL MOLECULE BIOSYNTHETIC PROCESS
- RESPONSE TO METAL ION
- RESPONSE TO TRANSITION METAL NANOPARTICLE
- CELLULAR RESPONSE TO METAL ION
- CELLULAR RESPONSE TO INORGANIC SUBSTANCE
- MEYLOID CELL DIFFERENTIATION
- REGULATION OF NEURON DEATH
- REGULATION OF NEURON APOPTOTIC PROCESS
- POSITIVE REGULATION OF NEURON APOPTOTIC PROCESS
- POSITIVE REGULATION OF NEURON DEATH
- GLUTAMINE FAMILY AMINO ACID METABOLIC PROCESS
- GLUTAMINE METABOLIC PROCESS
- ALANINE ASPARTATE AND GLUTAMATE METABOLISM
- DICARBOXYLIC ACID METABOLIC PROCESS
- BIOSYNTHESIS OF AMINO ACIDS
- NEGATIVE REGULATION OF PROTEIN COMPLEX ASSEMBLY
- RESPONSE TO TOPOLOGICALLY INCORRECT PROTEIN
- ISOPRENOID METABOLIC PROCESS
- ISOPRENOID BIOSYNTHETIC PROCESS
- RESPONSE TO DRUG

S1B

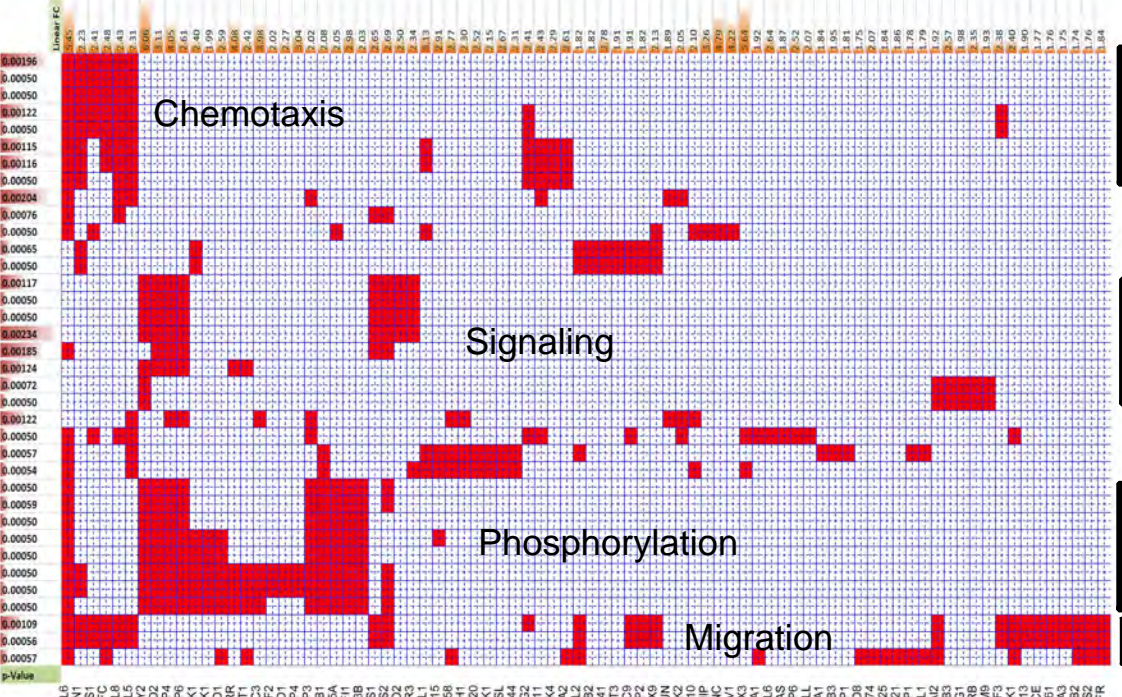

Chemotaxis

Signaling

Phosphorylation

Migration

- REGULATION OF LEUKOCYTE CHEMOTAXIS
- POSITIVE REGULATION OF LEUKOCYTE CHEMOTAXIS
- POSITIVE REGULATION OF LEUKOCYTE MIGRATION
- POSITIVE REGULATION OF BEHAVIOR
- POSITIVE REGULATION OF CHEMOTAXIS
- CHEMOTAXIS
- TAXIS
- CELL CHEMOTAXIS
- REGULATION OF TOLL-LIKE RECEPTOR SIGNALING PATHWAY
- INTERLEUKIN SIGNALING PATHWAY
- RESPONSE TO MECHANICAL STIMULUS
- REGULATION OF MUSCLE CELL DIFFERENTIATION
- REGULATION OF STRIATED MUSCLE CELL DIFFERENTIATION
- SIGNALING BY FGFR4
- SIGNALING BY FGFR3
- SIGNALING BY FGFR1
- SIGNALING BY FGFR2
- MAPK1 MAPK3 SIGNALING
- NEGATIVE REGULATION OF MAPK CASCADE
- SENSORY PERCEPTION OF MECHANICAL STIMULUS
- SENSORY PERCEPTION OF SOUND
- POSITIVE REGULATION OF INNATE IMMUNE RESPONSE
- INFLAMMATORY RESPONSE
- RESPONSE TO VIRUS
- RESPONSE TO OTHER ORGANISM
- NEGATIVE REGULATION OF TRANSFERASE ACTIVITY
- NEGATIVE REGULATION OF KINASE ACTIVITY
- NEGATIVE REGULATION OF PROTEIN KINASE ACTIVITY
- NEGATIVE REGULATION OF PROTEIN MODIFICATION PROCESS
- NEGATIVE REGULATION OF PROTEIN PHOSPHORYLATION
- NEGATIVE REGULATION OF PHOSPHATE METABOLIC PROCESS
- NEGATIVE REGULATION OF PHOSPHORUS METABOLIC PROCESS
- NEGATIVE REGULATION OF PHOSPHORYLATION
- POSITIVE REGULATION OF LOCOMOTION
- POSITIVE REGULATION OF CELL MIGRATION
- REGULATION OF ESTABLISHMENT OF PROTEIN LOCALIZATION





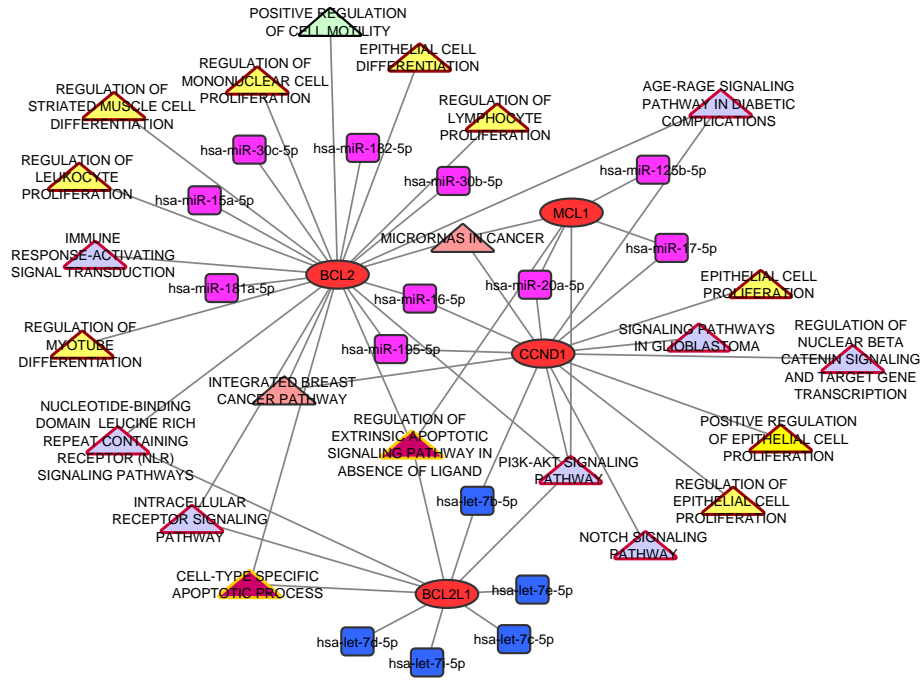

# Legends

- Up Reg Genes
- Down Reg Genes
- Up Reg. miRNA
- Down Reg. miRNA
- Lipid Pathways
- Cholesterol Pathways
- Sterol Pathways

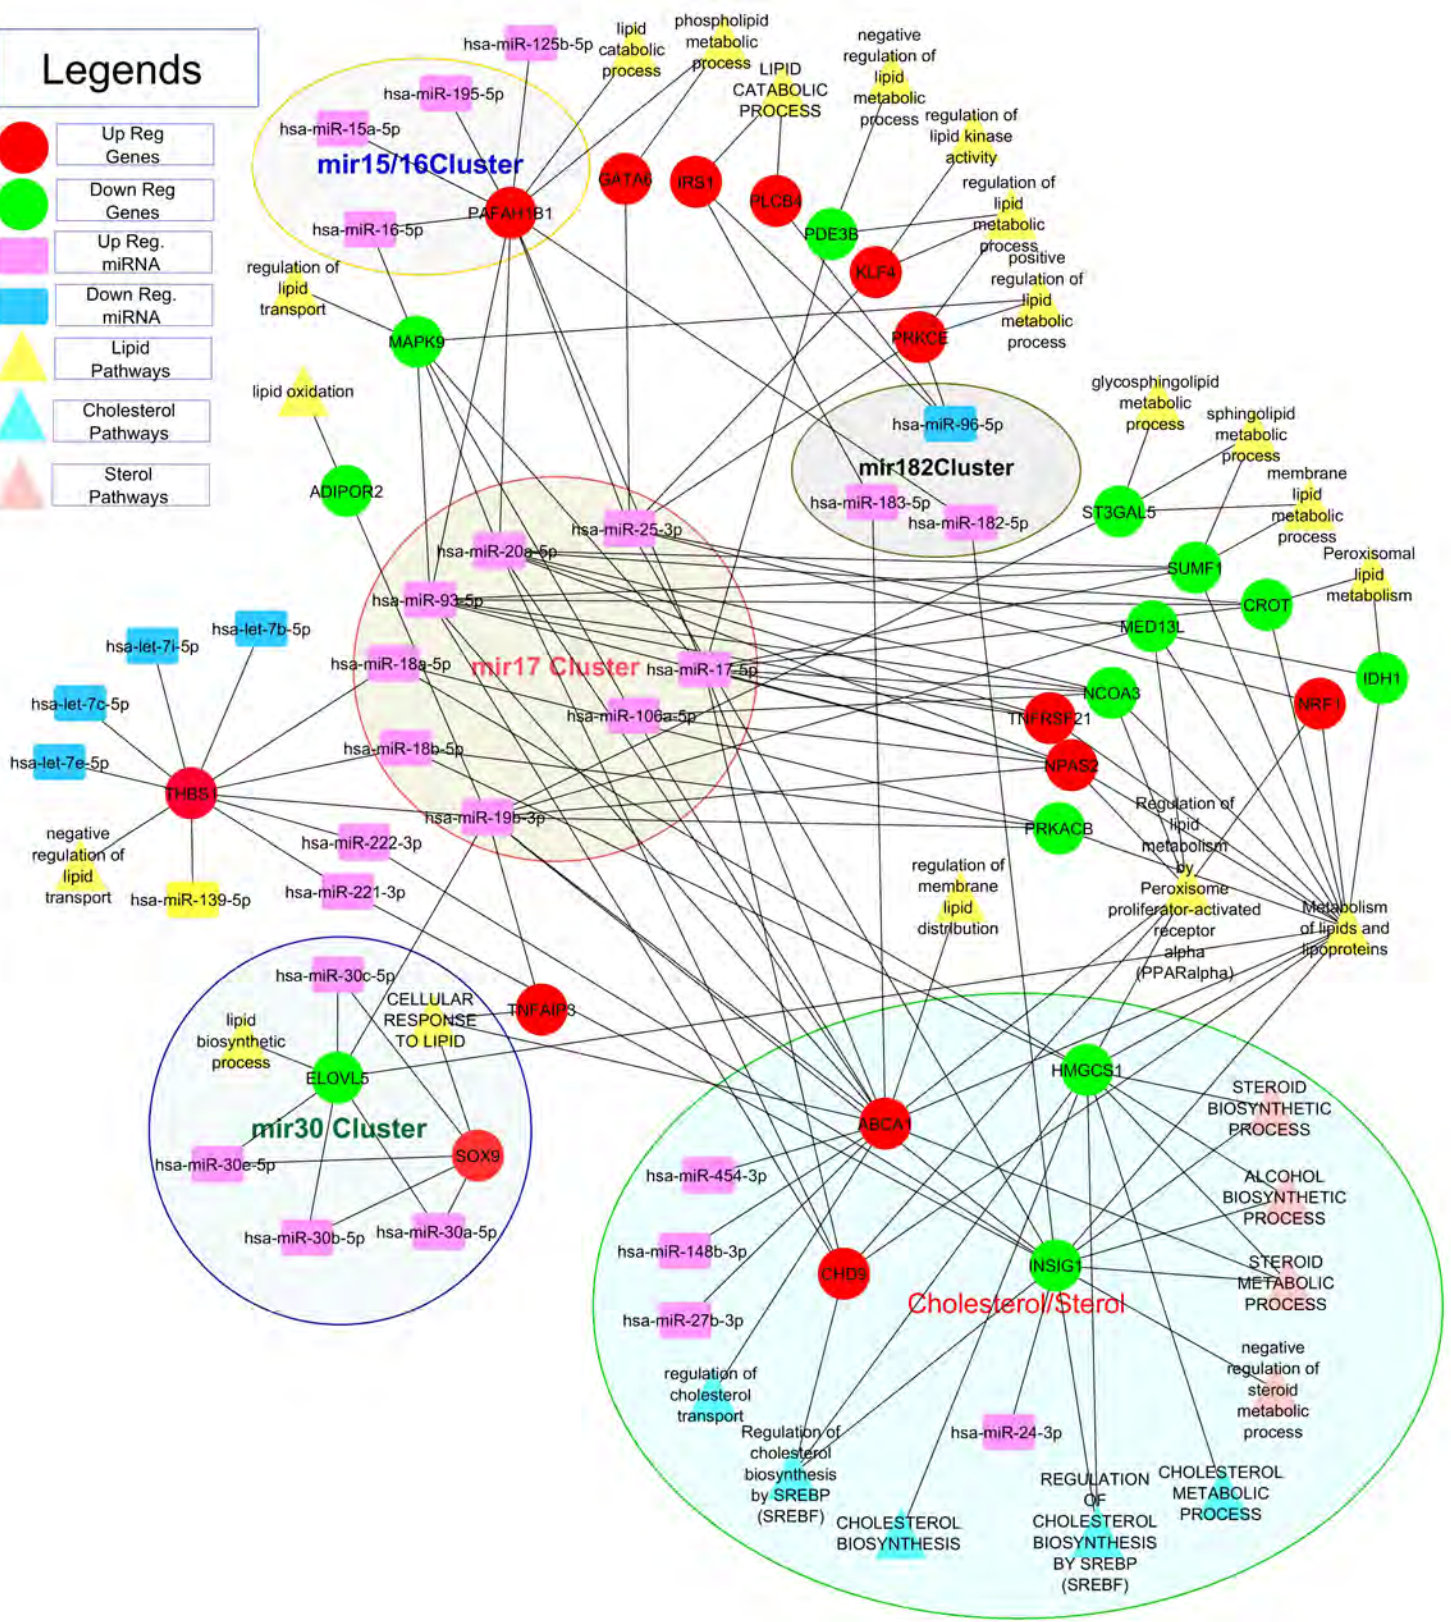



Supplementary Table 2.1:

List of the 925 and 764 genes that were down- and up-regulated respectively upon NCL depletion.

| Up Regulated Genes |           |            |              | Down Regulated Regulated Genes |            |           |              |
|--------------------|-----------|------------|--------------|--------------------------------|------------|-----------|--------------|
| Gene Symbol        | LinearFC  | P Value    | BH adj P Val | Gene Symbol                    | LinearFC   | P Value   | BH adj P Val |
| SPRY2              | 6.0629187 | 0.0001002  | 0.0059938    | NCL                            | -15.354377 | 4.33E-08  | 0.000215109  |
| LETM2              | 6.0207559 | 6.97E-06   | 0.0018509    | F11R                           | -6.2731983 | 1.26E-08  | 0.000177989  |
| PTX3               | 5.6442257 | 7.85E-06   | 0.001969     | SPINK4                         | -5.5606765 | 3.95E-08  | 0.000215109  |
| IL6                | 5.4548391 | 1.50E-07   | 0.0003914    | C8orf44-SGK3                   | -5.1937282 | 2.77E-09  | 0.00015151   |
| RSPO3              | 5.1661101 | 8.40E-07   | 0.0007766    | INSIG1                         | -4.5237666 | 2.64E-07  | 0.00055611   |
| TNC                | 4.7917418 | 6.31E-08   | 0.0002184    | SEMA6D                         | -4.5139722 | 3.31E-05  | 0.003501911  |
| CLDN1              | 4.5193496 | 2.06E-05   | 0.0028074    | CCNB1                          | -4.2001852 | 6.17E-06  | 0.001730288  |
| NAV3               | 4.4469573 | 0.00012145 | 0.0066006    | VASH2                          | -4.1367888 | 5.86E-09  | 0.000160088  |
| ETV1               | 4.2160047 | 0.00110793 | 0.022561     | CASP7                          | -4.1277305 | 2.93E-08  | 0.000177989  |
| SERTAD4-AS1        | 4.2045118 | 3.35E-05   | 0.0035264    | SQLE                           | -4.024184  | 2.71E-08  | 0.000177989  |
| PTPRR              | 4.078714  | 1.29E-05   | 0.0023649    | REEP5                          | -3.9605307 | 3.58E-07  | 0.00064127   |
| DUSP4              | 4.0483118 | 8.51E-06   | 0.0020227    | DENND6A                        | -3.8145581 | 1.24E-07  | 0.000377644  |
| BIRC3              | 3.9750451 | 4.52E-06   | 0.0016344    | MPPED2                         | -3.6971511 | 7.74E-05  | 0.005250669  |
| HHAT               | 3.8451755 | 5.43E-05   | 0.0044926    | MSMO1                          | -3.6825694 | 5.95E-08  | 0.000218393  |
| AMIGO2             | 3.8274542 | 2.23E-05   | 0.0028846    | ALDH5A1                        | -3.6585048 | 5.35E-08  | 0.000218393  |
| PHLDA1             | 3.5022799 | 0.00021702 | 0.0089416    | ENPP1                          | -3.5561954 | 1.66E-08  | 0.000177989  |
| LOC101928710       | 3.3608222 | 6.39E-08   | 0.0002184    | BAG1                           | -3.4635987 | 6.06E-07  | 0.000743678  |
| COL13A1            | 3.3024279 | 8.37E-05   | 0.0054479    | RAB40B                         | -3.4230034 | 1.06E-06  | 0.000837073  |
| TXNIP              | 3.2644751 | 2.10E-06   | 0.001273     | RP1-193H18                     | -3.4096597 | 8.58E-06  | 0.002022734  |
| IFRD1              | 3.1488918 | 6.11E-06   | 0.0017296    | MPZL2                          | -3.3687561 | 2.15E-06  | 0.001272984  |
| FOSL1              | 3.1308351 | 0.00053781 | 0.0148507    | FDFT1                          | -3.2423082 | 2.11E-08  | 0.000177989  |
| SPRED2             | 3.1063569 | 0.00012082 | 0.006583     | METTL7A                        | -3.198265  | 0.0007354 | 0.017611846  |
| SH3BP4             | 3.0417676 | 6.75E-07   | 0.0007437    | AKR1B10                        | -3.1469658 | 3.63E-05  | 0.003644738  |
| RP1-78O14.1        | 3.0298039 | 9.76E-06   | 0.0021599    | MMP13                          | -3.1352084 | 3.53E-06  | 0.001463899  |
| ERRFI1             | 2.9764168 | 1.80E-05   | 0.0026469    | SLC12A3                        | -3.1200346 | 3.21E-06  | 0.001463805  |
| LINC01094          | 2.9621682 | 3.65E-05   | 0.0036621    | RP11-355B11                    | -3.093468  | 5.52E-07  | 0.000743678  |
| MYEOV              | 2.9463021 | 1.15E-05   | 0.0022619    | ALDH1A3                        | -3.0653259 | 0.0004826 | 0.013770474  |
| ISG15              | 2.9089167 | 3.04E-06   | 0.0014593    | H19 /// MIR6                   | -2.9769566 | 2.88E-06  | 0.001459329  |
| SCG5               | 2.8256679 | 0.00010718 | 0.0062151    | FAM115A ///                    | -2.9176457 | 6.90E-07  | 0.000743678  |
| CASC10             | 2.7893634 | 9.51E-06   | 0.0021311    | MAP2K6                         | -2.9094594 | 0.000155  | 0.007438976  |
| BHLHE41            | 2.7819336 | 9.21E-06   | 0.0020903    | VAV3                           | -2.9023887 | 2.27E-05  | 0.002884643  |
| DDX58              | 2.7673908 | 5.30E-05   | 0.0044565    | LINC00470                      | -2.8737137 | 5.20E-07  | 0.000743678  |
| IL7R               | 2.7490237 | 5.89E-06   | 0.0017039    | HADH                           | -2.8653611 | 1.53E-06  | 0.001048033  |
| CCDC71L            | 2.7172982 | 0.00032687 | 0.0111644    | NXPE3                          | -2.8514833 | 7.04E-07  | 0.000743678  |
| ABCA1              | 2.6980833 | 0.00293597 | 0.0406604    | RDX                            | -2.8508886 | 3.09E-06  | 0.001463805  |
| IRS2               | 2.6948426 | 2.40E-05   | 0.0029896    | OLFML2A                        | -2.8400036 | 0.0001943 | 0.008471931  |
| OASL               | 2.6687947 | 0.00013327 | 0.0068483    | HOTS                           | -2.8263223 | 1.32E-06  | 0.000946775  |
| IRS1               | 2.6499502 | 5.09E-05   | 0.0043473    | SPTSSA                         | -2.8238196 | 3.35E-06  | 0.001463805  |
| BCL6               | 2.6357597 | 8.95E-07   | 0.0007766    | SMIM14                         | -2.7565739 | 0.0034903 | 0.045053996  |
| RGS17              | 2.6295981 | 0.0003093  | 0.0108194    | HSPB3                          | -2.7524832 | 5.60E-06  | 0.001673101  |
| SAT1               | 2.6165433 | 4.72E-06   | 0.0016344    | NETO2                          | -2.7485204 | 1.96E-07  | 0.000464994  |
| TCEA2              | 2.611868  | 9.96E-05   | 0.0059694    | ETNPPL                         | -2.7317414 | 0.001191  | 0.023531362  |
| EPHA2              | 2.6086862 | 2.44E-05   | 0.0030094    | IDH1                           | -2.720034  | 1.04E-05  | 0.002187732  |
| DUSP6              | 2.6057013 | 9.49E-05   | 0.0058128    | RHOBTB3                        | -2.7118064 | 4.65E-05  | 0.004115692  |
| CPA3               | 2.5952139 | 5.76E-07   | 0.0007437    | KRCC1                          | -2.7092506 | 0.0002016 | 0.008565061  |
| PID1               | 2.5866212 | 2.54E-06   | 0.0013618    | IDH2                           | -2.6909643 | 7.30E-06  | 0.001909802  |
| GJB3               | 2.5724963 | 8.37E-07   | 0.0007766    | KDEL3                          | -2.6612589 | 1.09E-05  | 0.002195492  |
| GIGYF2             | 2.5440871 | 3.00E-06   | 0.0014593    | SLC41A2                        | -2.6543429 | 1.96E-05  | 0.002756725  |

|               |           |            |           |               |            |           |             |
|---------------|-----------|------------|-----------|---------------|------------|-----------|-------------|
| FOXD1         | 2.5174955 | 5.53E-05   | 0.004509  | MEGF9         | -2.6516325 | 3.39E-06  | 0.001463899 |
| ISG20         | 2.516952  | 6.50E-06   | 0.0017586 | SPOCK3        | -2.6447183 | 0.0004744 | 0.013630278 |
| TNFAIP6       | 2.5150537 | 0.00034349 | 0.0114165 | HEATR5A       | -2.6174191 | 1.53E-06  | 0.001048033 |
| LINC01106 /// | 2.511548  | 2.15E-07   | 0.000489  | CLU           | -2.6136447 | 1.13E-05  | 0.00223222  |
| LOC100996843  | 2.5074195 | 2.27E-05   | 0.0028846 | TMTC4         | -2.5949999 | 3.77E-07  | 0.00064127  |
| AGO2 /// CASC | 2.4989187 | 0.00037985 | 0.0120258 | RPL31 /// TBC | -2.5735147 | 7.41E-08  | 0.000238404 |
| NALCN         | 2.4951667 | 3.49E-05   | 0.0035739 | ATXN3         | -2.5735128 | 1.49E-07  | 0.000391415 |
| VEGFC         | 2.4818917 | 0.00011464 | 0.0064091 | YPEL2         | -2.5674583 | 1.41E-05  | 0.00239658  |
| NTN4          | 2.461525  | 0.00132036 | 0.0249536 | ATP8A1        | -2.5616244 | 7.66E-06  | 0.001941767 |
| FST           | 2.4353893 | 8.19E-05   | 0.0053813 | DPY19L4       | -2.5480969 | 5.74E-06  | 0.001687058 |
| CXCL11        | 2.433385  | 0.00100647 | 0.0212403 | PHTF1         | -2.539172  | 3.97E-06  | 0.001572583 |
| CXCL8         | 2.4321691 | 0.00071627 | 0.0174342 | HMGCS1        | -2.5186694 | 2.42E-06  | 0.001348487 |
| PPP2R2D       | 2.4253837 | 1.98E-05   | 0.0027799 | PTPLAD2       | -2.5158217 | 3.23E-05  | 0.00347197  |
| DACT1         | 2.4228129 | 1.27E-05   | 0.0023649 | GPR180        | -2.5132898 | 0.0002548 | 0.009772891 |
| WDR20         | 2.4218504 | 7.07E-07   | 0.0007437 | ND6           | -2.4843285 | 0.0001321 | 0.006825365 |
| SCG2          | 2.4110135 | 5.27E-06   | 0.0016406 | ASNS          | -2.4842551 | 7.54E-06  | 0.001941767 |
| PDP1          | 2.4070953 | 0.0001253  | 0.0066657 | CCNE2         | -2.4679836 | 8.20E-06  | 0.002001743 |
| THBS1         | 2.4052274 | 0.00282023 | 0.0396615 | PIR           | -2.4658274 | 1.12E-06  | 0.00085374  |
| SPHK1         | 2.4020559 | 4.38E-06   | 0.0016283 | FXR1          | -2.4605478 | 4.12E-05  | 0.003870577 |
| DKK1          | 2.4009208 | 0.00078882 | 0.0184233 | RYR3          | -2.4604286 | 4.66E-05  | 0.004115692 |
| LOC541472     | 2.3893763 | 1.06E-05   | 0.0021926 | PSIP1         | -2.4545225 | 1.31E-05  | 0.002364945 |
| DAZAP2 /// LO | 2.3867239 | 8.09E-07   | 0.0007766 | KANK4         | -2.4481144 | 0.0037529 | 0.047191309 |
| F3            | 2.3836208 | 0.00080298 | 0.0186795 | HPDL          | -2.4307254 | 4.72E-06  | 0.001634419 |
| NEXN          | 2.3731397 | 5.53E-06   | 0.0016721 | SH3YL1        | -2.4261488 | 0.0006396 | 0.016395634 |
| SNAPC1        | 2.3658966 | 1.04E-05   | 0.0021877 | CPE           | -2.4259819 | 6.49E-05  | 0.004850755 |
| ELOVL2        | 2.3563939 | 3.43E-06   | 0.0014639 | PHGDH         | -2.423155  | 5.54E-06  | 0.001672145 |
| THRB          | 2.3505794 | 0.00033349 | 0.0112572 | SIPA1L1       | -2.4216772 | 5.19E-06  | 0.001639622 |
| IER3          | 2.3405485 | 7.59E-06   | 0.0019418 | ACADL         | -2.4132863 | 1.09E-06  | 0.00084284  |
| ENC1          | 2.3335326 | 0.00011447 | 0.0064058 | ANKRD9        | -2.4054971 | 3.71E-06  | 0.001515186 |
| IFI44         | 2.3134812 | 0.00028529 | 0.0102551 | FGFR3         | -2.3997901 | 4.19E-06  | 0.00162371  |
| CCL5          | 2.3095981 | 0.00042087 | 0.012692  | FAM210B       | -2.3985661 | 1.22E-05  | 0.002364945 |
| IFIH1         | 2.2960155 | 2.01E-05   | 0.0028074 | RHOU          | -2.3983864 | 0.0001656 | 0.007700393 |
| RAD51B        | 2.2872866 | 1.40E-05   | 0.0023885 | NQO1          | -2.3840395 | 3.87E-07  | 0.00064127  |
| DOCK4         | 2.2863068 | 0.00021778 | 0.0089661 | CYBRD1        | -2.3681558 | 7.55E-06  | 0.001941767 |
| ARMCX4        | 2.2792242 | 0.00014165 | 0.0070773 | FECH          | -2.366915  | 3.22E-07  | 0.000628672 |
| NFYA          | 2.275542  | 1.12E-05   | 0.0022222 | DCP2          | -2.3657401 | 2.69E-05  | 0.003146845 |
| SFT2D3 /// WD | 2.2750977 | 0.00038944 | 0.0121672 | IDI1          | -2.3652274 | 6.14E-07  | 0.000743678 |
| AKIP1 /// NUA | 2.2727428 | 5.71E-06   | 0.0016871 | LPPR4         | -2.3570286 | 6.25E-06  | 0.001742432 |
| SPOCD1        | 2.2684223 | 2.26E-06   | 0.001273  | SMAD9         | -2.3339286 | 1.64E-05  | 0.00251793  |
| DHRS2         | 2.2568687 | 1.91E-06   | 0.0011876 | WFDC1         | -2.3304108 | 0.0004782 | 0.013696964 |
| TMEM99        | 2.2276755 | 3.50E-06   | 0.0014639 | GCA           | -2.3280113 | 0.0001031 | 0.006093718 |
| EDN1          | 2.2263708 | 1.09E-05   | 0.0022009 | COL9A3        | -2.3257069 | 0.0001325 | 0.006825365 |
| OXR1          | 2.2054802 | 1.65E-06   | 0.0010867 | HTATIP2       | -2.3147377 | 6.61E-06  | 0.001781273 |
| RSL1D1        | 2.2020374 | 5.14E-06   | 0.0016347 | ATP6V0E1      | -2.3118746 | 1.72E-05  | 0.002583394 |
| TMEM79        | 2.1942424 | 0.00019468 | 0.0084719 | DHCR24        | -2.3071339 | 8.23E-07  | 0.000776563 |
| TMEM156       | 2.1817507 | 0.00066586 | 0.0166533 | IPP           | -2.2970499 | 4.15E-05  | 0.003877503 |
| PTPRG         | 2.1804874 | 0.00171118 | 0.0292817 | GOLIM4        | -2.2897344 | 2.93E-06  | 0.001459329 |
| LINC00623 /// | 2.1722299 | 1.63E-06   | 0.0010867 | SNCA          | -2.2764001 | 1.04E-05  | 0.002187732 |
| ROR1          | 2.1712782 | 0.00028672 | 0.0102865 | COL5A1        | -2.2710431 | 9.25E-07  | 0.000783881 |
| ANO2          | 2.1699229 | 6.13E-05   | 0.0046915 | ADSSL1        | -2.2698008 | 0.000988  | 0.020961226 |

|                |           |            |           |              |            |           |             |
|----------------|-----------|------------|-----------|--------------|------------|-----------|-------------|
| LINC00909      | 2.1652447 | 4.22E-06   | 0.0016237 | CENPU        | -2.2694424 | 0.0001952 | 0.008471931 |
| ANTXR2         | 2.1575119 | 0.0009089  | 0.0198697 | PDE3A        | -2.2662825 | 2.48E-05  | 0.003024597 |
| DCLK1          | 2.1528266 | 0.0010866  | 0.02229   | SERF1A /// S | -2.263986  | 6.97E-07  | 0.000743678 |
| LOC101928820   | 2.1443943 | 0.00282772 | 0.0397157 | SCARA5       | -2.2566187 | 8.36E-05  | 0.005447873 |
| SOX9           | 2.1324953 | 0.00326117 | 0.0432359 | ALDH1L2      | -2.2515246 | 8.73E-06  | 0.00203882  |
| INF2           | 2.1324907 | 4.78E-06   | 0.0016344 | SCYL3        | -2.2395207 | 3.35E-06  | 0.001463805 |
| RNF114         | 2.1280874 | 9.52E-07   | 0.0007839 | NLN          | -2.236649  | 8.80E-05  | 0.005589333 |
| FAM167A        | 2.1273225 | 5.73E-05   | 0.0045511 | TSPAN13      | -2.217856  | 4.31E-06  | 0.001628344 |
| GNGT1          | 2.1248075 | 0.00056989 | 0.0153718 | SYTL5        | -2.2167982 | 9.85E-05  | 0.005924131 |
| RP11-504A18.1  | 2.110238  | 0.00063178 | 0.016286  | GPR126       | -2.2154922 | 8.03E-07  | 0.000776563 |
| BCL10          | 2.0965302 | 0.00061197 | 0.0160092 | RBM4         | -2.2021759 | 3.19E-05  | 0.003461684 |
| SLC22A23       | 2.0943803 | 4.72E-06   | 0.0016344 | ASS1         | -2.1961525 | 0.0002025 | 0.008577793 |
| ADARB1         | 2.0827201 | 4.37E-06   | 0.0016283 | EP300-AS1    | -2.1958892 | 0.0002321 | 0.009244294 |
| RGS7           | 2.0786262 | 0.00376529 | 0.0472823 | SNTB2        | -2.1857837 | 2.75E-06  | 0.001416803 |
| RND3           | 2.0777207 | 5.38E-06   | 0.0016632 | ANKRD32      | -2.1834996 | 5.04E-05  | 0.004316979 |
| ITFG2 /// LOC1 | 2.0735266 | 8.72E-07   | 0.0007766 | FA2H         | -2.1812306 | 0.0001758 | 0.007936543 |
| INPP4B         | 2.0731824 | 0.00367287 | 0.0465278 | PPP2R2B      | -2.1791405 | 4.35E-06  | 0.001628344 |
| CD274          | 2.0715278 | 0.00014682 | 0.007206  | ACTC1        | -2.1787055 | 0.0003282 | 0.011178768 |
| MGLL           | 2.0678432 | 2.85E-05   | 0.0032612 | RPS15A       | -2.1777321 | 4.46E-05  | 0.00401486  |
| SNHG7 /// SNC  | 2.0644309 | 1.00E-05   | 0.0021801 | PRPS2        | -2.1772542 | 3.40E-06  | 0.001463899 |
| TPBG           | 2.0545452 | 2.56E-05   | 0.0030863 | SPTLC2       | -2.1693876 | 3.25E-06  | 0.001463805 |
| LINC00511 ///  | 2.0523386 | 8.58E-06   | 0.0020227 | CLGN         | -2.1658733 | 1.53E-05  | 0.00245844  |
| GADD45A        | 2.0462843 | 0.00011531 | 0.0064265 | TNFRSF19     | -2.1628984 | 0.0001269 | 0.006716488 |
| IRAK2          | 2.0462045 | 0.00016932 | 0.007783  | AGPAT3       | -2.1627926 | 2.98E-06  | 0.001459329 |
| HYI            | 2.0413393 | 3.81E-06   | 0.0015324 | RP5-1092A3.  | -2.1621312 | 0.0003447 | 0.011444401 |
| LOC100505812   | 2.0397736 | 4.25E-05   | 0.0039343 | ESRRG        | -2.1608497 | 6.49E-06  | 0.001758564 |
| SERTAD4        | 2.0378274 | 1.07E-05   | 0.0021926 | LOC10192968  | -2.1603998 | 1.21E-05  | 0.002346199 |
| ACOX2          | 2.0339001 | 0.00020107 | 0.0085619 | SNX10        | -2.1570102 | 5.28E-06  | 0.001640552 |
| UBASH3B        | 2.0319461 | 0.00020185 | 0.0085685 | DNAJC13      | -2.1474501 | 4.58E-06  | 0.001634419 |
| WFDC21P        | 2.0318694 | 2.16E-06   | 0.001273  | SLC4A4       | -2.1465842 | 0.0001754 | 0.00793088  |
| ARMCX5         | 2.0280655 | 1.59E-06   | 0.0010721 | SRD5A3       | -2.1384974 | 4.46E-05  | 0.00401486  |
| SH3RF2         | 2.0204646 | 2.35E-05   | 0.0029601 | C1GALT1C1    | -2.1367096 | 6.76E-07  | 0.000743678 |
| ZFAND2A        | 2.0204426 | 2.09E-06   | 0.001273  | FAM13C       | -2.1349736 | 0.0003995 | 0.012295927 |
| RYR2           | 2.0184601 | 0.00088538 | 0.0195825 | PARP1        | -2.1348768 | 8.97E-05  | 0.0056077   |
| TNFAIP3        | 2.0151625 | 3.49E-05   | 0.0035739 | ST6GALNAC1   | -2.1337652 | 0.001189  | 0.023531362 |
| FLJ32255       | 2.0114202 | 0.00025168 | 0.0097109 | EFHD1        | -2.1300553 | 2.93E-05  | 0.003330611 |
| PLCB4          | 2.0025524 | 0.00089559 | 0.0197011 | UROS         | -2.1258945 | 2.20E-06  | 0.001272984 |
| MBNL1-AS1      | 2.001887  | 0.0041854  | 0.0503713 | METTL21A     | -2.1230839 | 1.41E-05  | 0.00239658  |
| CYTH1          | 2.0006364 | 4.21E-06   | 0.0016237 | PCDH7        | -2.1224575 | 0.0003234 | 0.011091747 |
| SPINK1         | 1.9864264 | 1.53E-05   | 0.0024584 | CCBE1        | -2.1217293 | 0.0004211 | 0.01269201  |
| PCDH9          | 1.9833333 | 2.65E-05   | 0.0031191 | SCIN         | -2.1190489 | 0.0001122 | 0.006345664 |
| LINGO2         | 1.9802011 | 0.00150656 | 0.0271209 | ZNF362       | -2.1130007 | 8.15E-06  | 0.00199842  |
| LRIG1          | 1.9792987 | 0.00013801 | 0.0069897 | LOC254057    | -2.1128894 | 9.16E-06  | 0.002090333 |
| NEDD9          | 1.9774481 | 0.00032423 | 0.0111073 | GLUL         | -2.1128259 | 2.52E-06  | 0.001361825 |
| LOC101928054   | 1.9735336 | 0.00026872 | 0.010029  | APOL6        | -2.1122207 | 5.91E-05  | 0.004582711 |
| C6orf48        | 1.9710923 | 8.33E-06   | 0.0020188 | PDE8B        | -2.111891  | 3.80E-05  | 0.00368328  |
| ZNF134         | 1.9709241 | 2.19E-05   | 0.0028761 | RPARP-AS1    | -2.1101714 | 5.59E-05  | 0.004519668 |
| HORMAD1        | 1.9602026 | 2.69E-06   | 0.001404  | NAGA         | -2.1098593 | 1.34E-05  | 0.002364945 |
| SMIM7          | 1.9521593 | 0.0002563  | 0.0098063 | RAB11FIP2    | -2.1084118 | 1.92E-05  | 0.002726849 |
| CEP83          | 1.9476389 | 0.00173794 | 0.0295281 | PCMTD1       | -2.1033345 | 1.61E-05  | 0.002500365 |

|                |           |            |           |              |            |           |             |
|----------------|-----------|------------|-----------|--------------|------------|-----------|-------------|
| SERPINB3       | 1.9461028 | 0.00349767 | 0.0450816 | AMN1         | -2.0875821 | 0.0001626 | 0.007605442 |
| MAML3          | 1.9459239 | 0.00175506 | 0.0297008 | NUDT12       | -2.0834747 | 1.51E-05  | 0.002450781 |
| ZSCAN12        | 1.9445461 | 2.26E-05   | 0.0028846 | SREK1        | -2.0825407 | 0.0002374 | 0.009343174 |
| PARD3B         | 1.9442118 | 0.00013671 | 0.0069636 | STRBP        | -2.0784694 | 1.33E-05  | 0.002364945 |
| MYO5B          | 1.9413875 | 3.67E-05   | 0.0036621 | PCOLCE2      | -2.0776274 | 4.90E-06  | 0.001634419 |
| TIMM9          | 1.933651  | 3.04E-06   | 0.0014593 | STARD4       | -2.073173  | 5.66E-05  | 0.004543098 |
| MAFB           | 1.9322655 | 0.00023602 | 0.0093346 | RABL6        | -2.0648536 | 0.000101  | 0.006019467 |
| TAF1A          | 1.929314  | 0.0002195  | 0.0090158 | PQLC3        | -2.0619081 | 0.0002348 | 0.009309605 |
| SAMD4A         | 1.9261592 | 0.00068956 | 0.0169826 | DAB2 /// LOC | -2.0616477 | 0.0007119 | 0.01737736  |
| SAA1 /// SAA2  | 1.9192316 | 0.00068911 | 0.0169826 | ALDH3A1      | -2.0609478 | 0.0035439 | 0.045473946 |
| SNAI2          | 1.9176437 | 0.0001219  | 0.0066084 | MIR4680 ///  | -2.0597346 | 8.64E-06  | 0.002026699 |
| RGS20          | 1.914161  | 0.00012858 | 0.0067467 | HFE          | -2.0596319 | 3.96E-05  | 0.003790056 |
| MIR100HG       | 1.9123092 | 3.03E-05   | 0.0033787 | ASPH         | -2.0588152 | 7.46E-06  | 0.001940972 |
| CDC42EP2       | 1.9122304 | 4.44E-05   | 0.0040103 | ARHGAP5      | -2.0585365 | 1.63E-05  | 0.00251402  |
| TLE1           | 1.9117612 | 4.01E-05   | 0.0038042 | FZD6         | -2.0583506 | 2.10E-05  | 0.002840753 |
| HDAC9          | 1.9108322 | 0.00092875 | 0.0201359 | EIF4EBP2     | -2.0564297 | 4.32E-06  | 0.001628344 |
| DDIT3          | 1.9086179 | 4.93E-06   | 0.0016344 | BRI3BP       | -2.0544328 | 5.05E-06  | 0.001634419 |
| SUPT3H         | 1.904583  | 1.44E-05   | 0.0024103 | C1orf43      | -2.0510602 | 2.26E-06  | 0.001272984 |
| CDH13          | 1.9041548 | 7.67E-06   | 0.0019418 | TMX4         | -2.0438165 | 0.0003167 | 0.010946101 |
| TAGLN          | 1.8973804 | 0.00243459 | 0.036448  | TBC1D9       | -2.0426784 | 1.29E-05  | 0.002364945 |
| STX4           | 1.8947193 | 5.81E-06   | 0.0016903 | LOC728819    | -2.0396537 | 1.45E-05  | 0.002413015 |
| HINT3          | 1.8899765 | 0.00092004 | 0.0200252 | S100P        | -2.0395925 | 9.45E-05  | 0.005806079 |
| JUN            | 1.8874298 | 0.00014639 | 0.0071976 | GLCE         | -2.0391314 | 0.0001073 | 0.006215054 |
| RASSF9         | 1.8873434 | 0.00049645 | 0.0140636 | ZDHC13       | -2.0389318 | 8.99E-06  | 0.002064851 |
| KCNJ12 /// KCN | 1.8828649 | 0.00059072 | 0.0157075 | TCFL5        | -2.0362405 | 1.16E-06  | 0.000869352 |
| LAMB3          | 1.878066  | 5.50E-05   | 0.0045083 | RHOQ         | -2.0350344 | 1.26E-05  | 0.002364945 |
| MAP3K7CL       | 1.8775528 | 0.00105222 | 0.0218658 | CDS1         | -2.0336025 | 3.16E-05  | 0.003451002 |
| STC2           | 1.876473  | 0.0003514  | 0.0115599 | MAN2A1       | -2.0329723 | 6.83E-05  | 0.004953055 |
| LIAS           | 1.8722378 | 5.49E-06   | 0.0016721 | Sep-06       | -2.0322924 | 6.38E-06  | 0.001758564 |
| GPATCH4        | 1.8703306 | 8.87E-06   | 0.0020553 | CAST         | -2.0260172 | 0.0006836 | 0.016904072 |
| NAT8L          | 1.8667124 | 5.93E-05   | 0.0045827 | PDE1A        | -2.02467   | 1.45E-05  | 0.002413015 |
| TNFRSF21       | 1.8644807 | 0.00039804 | 0.0122959 | AGO4         | -2.0218847 | 1.65E-05  | 0.00252015  |
| RAD18          | 1.8637996 | 0.0001359  | 0.0069444 | CEP120       | -2.0185903 | 9.59E-05  | 0.005827684 |
| TMEM161B-AS    | 1.8636865 | 3.25E-06   | 0.0014638 | APAF1        | -2.0182092 | 7.82E-05  | 0.005273797 |
| HSBP1L1        | 1.8633918 | 4.83E-06   | 0.0016344 | ABRACL       | -2.0126349 | 4.10E-05  | 0.003869146 |
| CCND1          | 1.8627837 | 0.00397225 | 0.0488582 | CTNNB1       | -2.0094988 | 1.59E-05  | 0.002493351 |
| TXNRD2         | 1.860262  | 3.27E-06   | 0.0014638 | SLC7A11      | -2.0082378 | 7.03E-05  | 0.00500775  |
| DTX4           | 1.8518124 | 0.0003493  | 0.0115326 | PSCA         | -2.0072005 | 3.21E-05  | 0.003466607 |
| RBM14          | 1.8516701 | 5.01E-06   | 0.0016344 | ID2          | -2.0045526 | 0.0022292 | 0.034430278 |
| NDUFA7         | 1.850151  | 6.24E-05   | 0.0047312 | SEC24D       | -2.0028907 | 0.0012621 | 0.024327598 |
| HSF2BP         | 1.844118  | 8.00E-06   | 0.0019879 | ELOVL6       | -2.0001849 | 2.81E-05  | 0.00325287  |
| LMO7           | 1.8435168 | 0.00048038 | 0.0137224 | CRIP1        | -1.9983002 | 2.06E-05  | 0.002807439 |
| CYP1A1         | 1.8434946 | 0.00151694 | 0.0272466 | HN1L         | -1.9957601 | 2.61E-05  | 0.003092269 |
| EGFR           | 1.8433839 | 0.00026116 | 0.0099007 | G6PD         | -1.9954264 | 2.20E-05  | 0.002876666 |
| SRR            | 1.8422776 | 1.65E-05   | 0.0025257 | HOXA13       | -1.9938236 | 1.59E-05  | 0.002493351 |
| PDAP1          | 1.8418156 | 1.10E-05   | 0.0022097 | KREMEN1      | -1.992307  | 0.0002942 | 0.010476973 |
| YRDC           | 1.8411836 | 0.00049889 | 0.0140893 | EPHA7        | -1.990051  | 0.0004266 | 0.012823513 |
| SLC35F3        | 1.8399303 | 0.00064838 | 0.0165345 | MIS12        | -1.9889548 | 0.0001173 | 0.006468963 |
| FJX1           | 1.8387447 | 0.00020688 | 0.0087276 | PLEKHA7      | -1.9865365 | 0.000142  | 0.007077297 |
| LOX            | 1.837318  | 0.00021575 | 0.0089154 | SESTD1       | -1.9858413 | 0.0001932 | 0.008471931 |

|                |           |            |           |              |            |           |             |
|----------------|-----------|------------|-----------|--------------|------------|-----------|-------------|
| NPAS2          | 1.8365229 | 0.0002969  | 0.0105393 | OLFM1        | -1.9853904 | 0.00012   | 0.006580369 |
| SNAP25         | 1.8358888 | 0.00012533 | 0.0066657 | ELF3         | -1.984159  | 0.001008  | 0.021240336 |
| DYX1C1         | 1.8352212 | 0.00014815 | 0.0072452 | ATG7         | -1.9832522 | 2.04E-05  | 0.002807439 |
| MRPL1          | 1.8348336 | 2.58E-05   | 0.0030923 | ARID5B       | -1.9822918 | 1.50E-05  | 0.002442656 |
| PIGL           | 1.8347584 | 0.00017492 | 0.007928  | CDKN2C       | -1.9818085 | 0.0001453 | 0.007178896 |
| C12orf60       | 1.8334985 | 0.00026961 | 0.0100345 | FBXO9        | -1.9792667 | 1.90E-05  | 0.002722592 |
| ASAH2B         | 1.8315539 | 8.75E-05   | 0.0055879 | DAB2         | -1.9759088 | 0.0001859 | 0.008243515 |
| SH3RF3         | 1.8306075 | 1.05E-05   | 0.0021926 | HIBADH       | -1.9753401 | 1.28E-05  | 0.002364945 |
| TGM2           | 1.827883  | 2.57E-05   | 0.0030917 | OBSL1        | -1.9745486 | 0.002553  | 0.037419645 |
| EFNB2          | 1.824086  | 0.00010572 | 0.0062085 | TGDS         | -1.9728817 | 0.0017423 | 0.02955667  |
| MSANTD3-TME    | 1.8233763 | 0.00224653 | 0.0346583 | LOC1019282   | -1.9681336 | 3.31E-06  | 0.001463805 |
| BMP2           | 1.8232646 | 0.00107276 | 0.0220666 | DUSP2        | -1.9656074 | 0.0001174 | 0.006468963 |
| LOC101929787   | 1.8231917 | 0.00039961 | 0.0122959 | TDRD7        | -1.9648403 | 7.52E-05  | 0.00517509  |
| ERICH1         | 1.8231158 | 0.0001025  | 0.0060852 | GPRC5A       | -1.9640881 | 5.45E-06  | 0.001672145 |
| GKAP1          | 1.820689  | 0.00022638 | 0.0091519 | DNASE2       | -1.9636681 | 0.0001103 | 0.006302715 |
| GART           | 1.8201481 | 0.00090643 | 0.019847  | SC5D         | -1.963023  | 1.70E-05  | 0.002572067 |
| GFPT2          | 1.8185272 | 3.84E-05   | 0.0037108 | ABCC6 /// AB | -1.9590998 | 9.99E-05  | 0.005983356 |
| BCL2           | 1.8184176 | 0.00066608 | 0.0166533 | VEZT         | -1.9576643 | 0.0002529 | 0.00973635  |
| THAP9-AS1      | 1.8183214 | 0.00049424 | 0.014023  | TMEM50B      | -1.9563884 | 4.30E-05  | 0.003965634 |
| LOC100996760   | 1.8173845 | 0.00024025 | 0.0094094 | PLAC1        | -1.9524028 | 1.67E-06  | 0.001087373 |
| RAB27B         | 1.813419  | 0.00427185 | 0.0509968 | DNAJC6       | -1.9508951 | 0.0001339 | 0.006874783 |
| GBP1           | 1.8103654 | 0.00065759 | 0.0166065 | RHOBTB1      | -1.950174  | 6.14E-05  | 0.004692297 |
| LOC100507507   | 1.8086048 | 6.81E-05   | 0.0049531 | RNASEL       | -1.9498365 | 0.0003007 | 0.010600566 |
| ISM1           | 1.8066544 | 0.00172701 | 0.0294432 | GALNT12      | -1.9480828 | 0.0018725 | 0.030901273 |
| NUFIP1         | 1.8061801 | 3.76E-05   | 0.0036833 | XXYL1        | -1.9479654 | 1.40E-05  | 0.002388507 |
| JAG1           | 1.8038927 | 0.00055789 | 0.0151529 | DHCR7        | -1.9464548 | 2.15E-05  | 0.002876143 |
| MAFF           | 1.8033069 | 0.00053757 | 0.0148507 | NT5DC1       | -1.9437288 | 1.15E-05  | 0.002261862 |
| SNHG1 /// SNC  | 1.802178  | 6.24E-05   | 0.0047312 | FAM81A       | -1.9429453 | 5.07E-06  | 0.001634419 |
| ENAH           | 1.8019572 | 8.66E-05   | 0.0055674 | ERGIC2       | -1.9426864 | 1.57E-05  | 0.002478152 |
| SYNCRIP        | 1.7989661 | 3.03E-05   | 0.0033787 | NUCKS1       | -1.9419012 | 5.65E-06  | 0.001677803 |
| RAB38          | 1.7967799 | 0.00085802 | 0.0192917 | ZNF652       | -1.940188  | 5.77E-05  | 0.004555177 |
| KLF2           | 1.7964259 | 5.48E-05   | 0.0045083 | GPR107       | -1.9396762 | 5.90E-05  | 0.004582711 |
| TNFRSF12A      | 1.7948761 | 4.13E-05   | 0.0038706 | HMGNS        | -1.9392509 | 2.95E-05  | 0.003330611 |
| RPP14          | 1.7942611 | 0.00060068 | 0.0158581 | CTB-119C2.1  | -1.9370934 | 3.21E-05  | 0.003466607 |
| ADAT3 /// SCA  | 1.7938269 | 0.0001027  | 0.0060903 | SUMF1        | -1.93643   | 2.80E-05  | 0.00325287  |
| INO80B /// INC | 1.7910707 | 8.04E-06   | 0.0019879 | HSD17B7      | -1.9305031 | 0.0001664 | 0.00772502  |
| GPR158         | 1.7906764 | 1.80E-05   | 0.0026469 | CCDC34       | -1.9296452 | 0.0025275 | 0.037227988 |
| BCL2L1         | 1.7904795 | 4.79E-05   | 0.0041841 | PSMD11       | -1.9283023 | 1.75E-05  | 0.002613747 |
| LOC101928955   | 1.7896616 | 0.00219838 | 0.0342148 | PPA2         | -1.9247053 | 0.0001141 | 0.00639562  |
| TPM1           | 1.7865821 | 0.00033212 | 0.0112438 | CTSB         | -1.9223651 | 7.19E-05  | 0.005073395 |
| GNG4           | 1.7854217 | 4.52E-05   | 0.0040314 | LHX2         | -1.920923  | 0.0002753 | 0.010127117 |
| ZBTB26         | 1.7853666 | 6.31E-06   | 0.0017515 | PCYOX1L      | -1.9202464 | 3.20E-05  | 0.003461684 |
| PMAIP1         | 1.7848972 | 3.95E-05   | 0.0037901 | NPHP3        | -1.9200829 | 3.14E-05  | 0.003438259 |
| GAS5 /// SNOR  | 1.7843872 | 1.01E-05   | 0.0021823 | UBE4B        | -1.9174241 | 8.96E-05  | 0.0056077   |
| GATA6          | 1.7843857 | 0.00083743 | 0.0190647 | KAT2B        | -1.9138291 | 1.91E-05  | 0.002726849 |
| GJB5           | 1.7841373 | 0.00065133 | 0.0165502 | ATF7IP2      | -1.9096398 | 4.41E-06  | 0.001628344 |
| PRRT3-AS1      | 1.7841196 | 6.00E-06   | 0.0017253 | SLC35G1      | -1.908687  | 0.000317  | 0.01094937  |
| HNMT           | 1.7841023 | 5.89E-05   | 0.0045827 | WDR37        | -1.9073414 | 0.0012464 | 0.024166422 |
| GPR37 /// SEL1 | 1.780785  | 0.00042769 | 0.0128342 | PDK3         | -1.9060504 | 4.49E-05  | 0.004027564 |
| LOC645166 ///  | 1.7806128 | 8.49E-05   | 0.0054912 | SNN          | -1.9030158 | 0.0009125 | 0.019925295 |

|               |           |            |           |               |            |           |             |
|---------------|-----------|------------|-----------|---------------|------------|-----------|-------------|
| LOC101930150  | 1.7805705 | 0.00228598 | 0.035069  | SNHG4         | -1.9025403 | 6.12E-05  | 0.004691516 |
| FLJ31306      | 1.7801615 | 7.43E-05   | 0.005139  | FTL           | -1.9024762 | 6.97E-05  | 0.004987622 |
| ZNHIT6        | 1.7780693 | 0.00025978 | 0.009885  | FAM213A       | -1.9011714 | 2.81E-05  | 0.00325352  |
| PPP1R15A      | 1.7768377 | 5.42E-05   | 0.0044917 | COX7B         | -1.8999597 | 0.0001261 | 0.00669642  |
| RUNX2         | 1.7767638 | 0.0023373  | 0.0355373 | ANKRD20A12    | -1.899413  | 0.0009109 | 0.019897546 |
| FAIM3         | 1.7764549 | 0.00327349 | 0.0433077 | CHD6          | -1.8991253 | 2.92E-05  | 0.003330611 |
| PRKCE         | 1.7746417 | 0.00073393 | 0.0175999 | ZMYM6 /// Z   | -1.8989731 | 3.41E-05  | 0.003541674 |
| NT5E          | 1.7741454 | 0.00027278 | 0.0101044 | ENDOD1        | -1.893027  | 0.0001348 | 0.006912288 |
| SPATA17       | 1.7712849 | 0.0004636  | 0.0134476 | PCK2          | -1.8918544 | 0.0001068 | 0.006215054 |
| MAD1L1        | 1.7707106 | 0.00057678 | 0.0154966 | PLOD1         | -1.8902647 | 3.69E-05  | 0.003662068 |
| PCSK1         | 1.7680671 | 0.00408948 | 0.0497204 | C14orf1       | -1.8893785 | 1.30E-05  | 0.002364945 |
| SLC2A3        | 1.767462  | 0.00143872 | 0.0264056 | PRKACA        | -1.8888849 | 8.52E-06  | 0.002022734 |
| ZNF689        | 1.7664938 | 2.43E-05   | 0.0030094 | TUBGCP5       | -1.8878956 | 3.78E-05  | 0.00368328  |
| LIF           | 1.7655014 | 1.04E-05   | 0.0021877 | ANXA9         | -1.8872745 | 0.0014598 | 0.026639979 |
| ARL6          | 1.765138  | 0.00047291 | 0.0136157 | MBNL3         | -1.8864643 | 1.24E-05  | 0.002364945 |
| MTHFD2L       | 1.7649626 | 0.00054135 | 0.0148909 | SNX5          | -1.8854441 | 1.38E-05  | 0.002388507 |
| PTGS2         | 1.7645508 | 0.00346171 | 0.0448398 | GALNT2        | -1.8812642 | 3.77E-05  | 0.00368328  |
| STAMBPL1      | 1.7638494 | 0.00096019 | 0.0206038 | RPS6KA5       | -1.8805323 | 0.0004061 | 0.012438224 |
| C1orf109      | 1.7638175 | 0.00087519 | 0.019443  | IFT80         | -1.8789    | 3.76E-05  | 0.00368328  |
| Mar-04        | 1.7625353 | 7.06E-05   | 0.0050209 | SELO          | -1.8783419 | 4.93E-06  | 0.001634419 |
| PATL1         | 1.7618657 | 1.70E-05   | 0.0025721 | TMEM117       | -1.8738517 | 5.60E-06  | 0.001673101 |
| CYR61         | 1.7618092 | 0.00338565 | 0.0441896 | SGMS2         | -1.8736833 | 0.0004199 | 0.012669963 |
| PDGFC         | 1.7606998 | 0.00057433 | 0.0154501 | CADPS2        | -1.8709783 | 0.0002661 | 0.00997704  |
| MRPL52        | 1.7589765 | 3.08E-05   | 0.0034191 | PRKX          | -1.8686536 | 2.06E-05  | 0.002807439 |
| CAMSAP2       | 1.7581084 | 7.64E-05   | 0.0052116 | LOC1019298    | -1.8685423 | 0.0012599 | 0.02431023  |
| ANXA3         | 1.7545807 | 7.52E-05   | 0.0051751 | OMA1          | -1.8669217 | 5.75E-05  | 0.004555177 |
| SLC16A9       | 1.7525432 | 0.0005266  | 0.0146898 | LINC01003     | -1.8668989 | 0.000128  | 0.006721761 |
| NFAT5         | 1.7516119 | 0.00061127 | 0.0159986 | TRIQQ         | -1.8640198 | 2.60E-05  | 0.003092269 |
| BTG3          | 1.7504861 | 5.45E-05   | 0.0045018 | SGPP1         | -1.8634999 | 5.65E-05  | 0.004543098 |
| SLC16A14      | 1.7478579 | 0.0002214  | 0.0090462 | SESN3         | -1.8616218 | 0.0030337 | 0.041342935 |
| SLCO1B3       | 1.7472433 | 0.00041973 | 0.01267   | SDF2L1        | -1.8616206 | 1.34E-05  | 0.002364945 |
| OTUD1         | 1.7468732 | 5.40E-05   | 0.0044917 | PI4K2B /// SE | -1.8614477 | 9.21E-06  | 0.002090333 |
| CARD8         | 1.7467096 | 0.00023847 | 0.0093598 | NUTF2 /// NU  | -1.85927   | 3.97E-05  | 0.003797455 |
| CCDC132       | 1.7454899 | 0.00165446 | 0.0287456 | C6orf147 ///  | -1.8588377 | 0.0001995 | 0.008531215 |
| BACH2         | 1.7434383 | 0.0015116  | 0.0271865 | LINC00674     | -1.8585324 | 1.87E-05  | 0.002703229 |
| IFIT2         | 1.7426818 | 6.14E-05   | 0.0046915 | TRIM37        | -1.8562896 | 5.37E-05  | 0.004491723 |
| SNHG8 /// SNC | 1.7420473 | 2.23E-05   | 0.0028846 | ADD3          | -1.8560932 | 6.41E-06  | 0.001758564 |
| RELB          | 1.7398705 | 0.00040815 | 0.0124528 | EML1          | -1.8552613 | 0.0004283 | 0.01284545  |
| MCL1          | 1.7392307 | 0.00015614 | 0.0074559 | KIAA0101      | -1.8537595 | 2.44E-05  | 0.003009441 |
| DCLRE1A       | 1.7387427 | 9.78E-05   | 0.0058904 | FBXO22        | -1.8532009 | 0.0005325 | 0.014779292 |
| PPP1R14C      | 1.7382394 | 0.00040839 | 0.0124534 | TUSC3         | -1.8433462 | 8.34E-06  | 0.002018774 |
| TGFB2         | 1.7361422 | 9.41E-06   | 0.002127  | RPS27L        | -1.8427095 | 1.56E-05  | 0.002475249 |
| CUL4A         | 1.7359231 | 4.31E-05   | 0.0039666 | FGFBP1        | -1.8422804 | 0.001107  | 0.022555047 |
| CHIC2         | 1.7355774 | 0.00034166 | 0.0113957 | CCNG2         | -1.8417152 | 0.0030384 | 0.041354324 |
| CC2D2A        | 1.7345214 | 0.00069097 | 0.0170099 | RIMKLB        | -1.8402277 | 3.43E-05  | 0.003547985 |
| OSMR          | 1.7328171 | 0.00045186 | 0.0132397 | LOC10192818   | -1.8393603 | 0.0008736 | 0.019424668 |
| ACVR1         | 1.732413  | 0.00023701 | 0.0093432 | SSX2IP        | -1.8389153 | 6.07E-06  | 0.001728221 |
| C12orf29      | 1.7320925 | 0.00026201 | 0.0099007 | HEY1          | -1.8375077 | 0.0004634 | 0.013447616 |
| DTWD1         | 1.7307129 | 2.41E-05   | 0.0029981 | JPH1          | -1.8355026 | 1.81E-05  | 0.002647264 |
| SH2D5         | 1.7303238 | 0.00016935 | 0.007783  | LOC439911     | -1.8353938 | 8.54E-06  | 0.002022734 |

|                 |           |            |           |              |            |           |             |
|-----------------|-----------|------------|-----------|--------------|------------|-----------|-------------|
| CPED1           | 1.7279564 | 0.00215287 | 0.0337659 | TMEM37       | -1.8352566 | 2.19E-05  | 0.002876143 |
| AUP1            | 1.7260412 | 9.95E-06   | 0.0021766 | KIAA0232     | -1.8341296 | 3.92E-05  | 0.003778627 |
| DIRAS3          | 1.7253251 | 0.00335919 | 0.043959  | AIF1L        | -1.8315878 | 0.0003674 | 0.011823763 |
| TJP2            | 1.7239971 | 0.00423663 | 0.0507537 | DBT          | -1.8299693 | 0.0019059 | 0.031261308 |
| SCNM1 /// TNF   | 1.7223758 | 1.19E-05   | 0.0023163 | LMO1         | -1.8285515 | 0.0019764 | 0.031990033 |
| CASP4           | 1.7211686 | 0.00017767 | 0.0079951 | LOC1019289   | -1.8280491 | 4.12E-05  | 0.003870577 |
| KIFC3           | 1.7200568 | 3.24E-05   | 0.0034746 | GTF2IRD2     | -1.8271434 | 2.00E-05  | 0.002807439 |
| PSTPIP2         | 1.7198858 | 0.00022171 | 0.0090462 | UNKL         | -1.8271137 | 0.0004612 | 0.013406219 |
| HKR1            | 1.7189872 | 0.00015287 | 0.0073903 | NADSYN1      | -1.8264907 | 1.35E-05  | 0.002364945 |
| BICD1           | 1.7175647 | 0.00013531 | 0.00693   | NIPAL2       | -1.8259451 | 8.89E-05  | 0.005601897 |
| HOXA3           | 1.716753  | 6.13E-05   | 0.0046915 | MBTD1        | -1.82574   | 0.0015718 | 0.027808675 |
| RP11-350F4.2    | 1.7160229 | 5.03E-05   | 0.004317  | HOOK1        | -1.8244689 | 1.66E-05  | 0.002526824 |
| ZNF26           | 1.7155735 | 0.00012244 | 0.0066087 | ZNF333       | -1.823572  | 1.69E-05  | 0.002572067 |
| C2orf49         | 1.7138329 | 5.72E-05   | 0.0045511 | TMEM183A /   | -1.8210584 | 9.50E-06  | 0.002131095 |
| ZSCAN21         | 1.7135017 | 2.17E-05   | 0.0028761 | SLC2A13      | -1.8196309 | 2.18E-05  | 0.002876143 |
| SARS            | 1.7132102 | 0.00044152 | 0.013031  | MIR7110 ///  | -1.8192354 | 1.38E-05  | 0.002388507 |
| GABPB1-AS1      | 1.7113088 | 0.00013835 | 0.0069975 | ENOX2        | -1.8190665 | 0.0001863 | 0.008254451 |
| C19orf48 /// SM | 1.7097535 | 1.52E-05   | 0.0024584 | PRKD3        | -1.8162205 | 6.16E-05  | 0.004695351 |
| TNIP1           | 1.7092204 | 8.80E-05   | 0.0055893 | DLEU2        | -1.8161258 | 0.0019894 | 0.032124125 |
| FLCN            | 1.7078267 | 0.00038228 | 0.0120469 | LOC10192810  | -1.8160724 | 0.0023801 | 0.03588915  |
| FHL2            | 1.7074179 | 8.87E-05   | 0.0056019 | DECR1        | -1.8156878 | 2.44E-05  | 0.003009441 |
| USE1            | 1.7069904 | 8.15E-06   | 0.0019984 | DZIP1        | -1.8150571 | 1.92E-05  | 0.002726849 |
| MYL9            | 1.7066429 | 0.00084904 | 0.0191982 | CPT2         | -1.8136849 | 1.11E-05  | 0.002215913 |
| BCAR3           | 1.705529  | 0.00062995 | 0.0162616 | ATP7A        | -1.8124816 | 2.61E-05  | 0.003093727 |
| RRAD            | 1.7034161 | 0.0018027  | 0.0301784 | SETMAR       | -1.8121806 | 1.01E-05  | 0.002182283 |
| ZNF655          | 1.7032445 | 0.00012453 | 0.0066622 | DHFR         | -1.8111372 | 7.81E-06  | 0.001966762 |
| NDUF4F4         | 1.7019582 | 0.00105459 | 0.0218847 | PAPSS2       | -1.8110751 | 0.0002653 | 0.009976992 |
| TWIST2          | 1.701947  | 0.00041716 | 0.012615  | PCYOX1       | -1.8107066 | 0.0003418 | 0.011395702 |
| ZNF383          | 1.6988338 | 0.00020047 | 0.0085562 | CCM2         | -1.8086933 | 4.34E-05  | 0.003973143 |
| LOC101928076    | 1.6977914 | 4.09E-05   | 0.0038661 | C3orf80      | -1.8076728 | 0.0001077 | 0.006231104 |
| C11orf1         | 1.6976819 | 5.96E-05   | 0.0045974 | SLC26A2      | -1.8073172 | 0.0011874 | 0.023531362 |
| ALDH8A1         | 1.6955341 | 0.00015199 | 0.0073607 | HR           | -1.8073145 | 0.0023104 | 0.035314905 |
| TESC            | 1.6947734 | 0.00280642 | 0.0396121 | RECK         | -1.8041294 | 6.05E-05  | 0.004650023 |
| LOC100130938    | 1.6923484 | 0.00398173 | 0.0489326 | BACE1        | -1.8022648 | 0.0002347 | 0.009309605 |
| SLC39A9         | 1.6921842 | 0.00012088 | 0.006583  | ATP9A        | -1.7999497 | 5.68E-05  | 0.004543098 |
| ZNF311          | 1.6919549 | 0.00048702 | 0.0138614 | PRTG         | -1.7994975 | 0.0001378 | 0.006989707 |
| FN1             | 1.691436  | 7.18E-05   | 0.0050734 | MTFMT        | -1.7982451 | 2.18E-05  | 0.002876143 |
| RALGAPA1        | 1.6911101 | 0.00158882 | 0.0279661 | PEBP1        | -1.7969561 | 1.53E-05  | 0.00245844  |
| RP11-247L20.4   | 1.6881041 | 0.00043896 | 0.0129887 | AFF1         | -1.796524  | 1.26E-05  | 0.002364945 |
| H1FO            | 1.6874719 | 0.00026918 | 0.0100324 | TMEM144      | -1.7959334 | 0.0006895 | 0.016982622 |
| UST             | 1.6870226 | 0.00131166 | 0.0248673 | PBLD         | -1.7958798 | 9.34E-05  | 0.005768736 |
| NRP1            | 1.6867769 | 0.00085334 | 0.0192552 | LOC10050683  | -1.7955148 | 0.0011391 | 0.022837946 |
| DNM3            | 1.6865469 | 0.00384573 | 0.0479619 | ADAM1A ///   | -1.7943528 | 0.0003667 | 0.011808174 |
| FGF2            | 1.6856567 | 6.77E-05   | 0.0049531 | SLC39A8      | -1.7941094 | 4.23E-05  | 0.003929839 |
| THAP1           | 1.6856233 | 8.95E-05   | 0.0056077 | GBP2         | -1.7937734 | 0.0016855 | 0.029025774 |
| GLIPR1          | 1.6852583 | 0.00073602 | 0.0176118 | VAMP1        | -1.7929176 | 0.0001809 | 0.008067732 |
| LRRC7           | 1.6844976 | 0.00050107 | 0.0141434 | LMF1         | -1.7921076 | 0.0015836 | 0.027929629 |
| CXorf40A /// C  | 1.6834825 | 7.12E-05   | 0.0050469 | CES1 /// LOC | -1.7911774 | 6.98E-05  | 0.004987622 |
| IL32            | 1.6833964 | 0.00014228 | 0.0070773 | MRE11A       | -1.7907979 | 0.0006012 | 0.015863952 |
| HRH1            | 1.6832591 | 0.00044213 | 0.0130386 | IQGAP2       | -1.7896331 | 0.0006458 | 0.016492809 |



|                |           |            |           |             |            |           |             |
|----------------|-----------|------------|-----------|-------------|------------|-----------|-------------|
| AJUBA          | 1.682602  | 0.00046667 | 0.0135216 | UGT8        | -1.7883703 | 0.0021175 | 0.03346214  |
| CEBPD          | 1.6820394 | 0.00013187 | 0.0068254 | GPX8        | -1.7878444 | 2.68E-05  | 0.003132594 |
| PRKAB1         | 1.6818464 | 0.00023669 | 0.0093432 | BBS2        | -1.7863677 | 2.19E-05  | 0.002876143 |
| NFIL3          | 1.6800919 | 0.00023675 | 0.0093432 | ZFYVE16     | -1.7858685 | 0.0010634 | 0.021948866 |
| SMG5           | 1.679861  | 3.10E-05   | 0.0034191 | BTN3A3      | -1.7844171 | 4.29E-05  | 0.003965634 |
| ZCCHC10        | 1.6795653 | 0.00037888 | 0.0120069 | MTCH2       | -1.7837241 | 7.16E-06  | 0.001882948 |
| THSD4          | 1.6790931 | 0.00326324 | 0.0432527 | TDRKH       | -1.7833881 | 4.14E-05  | 0.003877503 |
| SLIT2          | 1.6779664 | 0.00038939 | 0.0121672 | ICK         | -1.7830666 | 0.000245  | 0.009540573 |
| FAM60A         | 1.6779345 | 3.98E-05   | 0.0037975 | CD59        | -1.7827109 | 2.65E-05  | 0.003119135 |
| PLGLB1 /// PLG | 1.6758088 | 0.0002505  | 0.0096791 | CNTNAP3 /// | -1.7817252 | 6.74E-05  | 0.004949574 |
| CENPBD1        | 1.6754257 | 3.04E-05   | 0.0033844 | PDIA3       | -1.7812748 | 0.0003162 | 0.010941365 |
| LOC101929147   | 1.6718078 | 8.46E-05   | 0.0054912 | FBXO3       | -1.7812213 | 3.11E-05  | 0.003424078 |
| LOC102724257   | 1.6714116 | 0.00027728 | 0.0101405 | PTPRJ       | -1.7795741 | 2.27E-05  | 0.002884643 |
| LINC01138      | 1.6711757 | 0.00012745 | 0.0067169 | CEP70       | -1.7794426 | 1.60E-05  | 0.002493351 |
| AKIRIN2        | 1.6704863 | 0.0014025  | 0.0259236 | GAS6-AS1    | -1.7776325 | 0.0012175 | 0.023838794 |
| DCAF4L1        | 1.6693145 | 0.00138324 | 0.0257065 | PTGFRN      | -1.7770951 | 2.58E-05  | 0.003092269 |
| DLEU1          | 1.6676274 | 3.41E-05   | 0.003542  | COL18A1     | -1.777075  | 3.40E-05  | 0.003541674 |
| AOX1           | 1.6671157 | 0.00040705 | 0.0124382 | HELLS       | -1.7767088 | 0.00059   | 0.015707504 |
| SIPA1L2        | 1.6671155 | 0.00103357 | 0.0215937 | BBIP1       | -1.7759884 | 8.12E-05  | 0.005381287 |
| RPS19BP1       | 1.6661003 | 9.12E-05   | 0.0056541 | MPHOSPH9    | -1.7743331 | 4.61E-05  | 0.004085711 |
| PDGFB          | 1.6659187 | 1.54E-05   | 0.0024661 | SPINK5      | -1.7739826 | 0.0017155 | 0.029301769 |
| ARHGEF18       | 1.6638123 | 5.03E-05   | 0.004317  | EVL         | -1.7739088 | 9.66E-06  | 0.002147789 |
| CRBN           | 1.6637922 | 1.26E-05   | 0.0023649 | EMB         | -1.7739049 | 0.0001454 | 0.007178896 |
| CCDC68         | 1.6634822 | 0.00065742 | 0.0166065 | MAPK1       | -1.7732729 | 8.78E-05  | 0.005589333 |
| MBP            | 1.6623475 | 0.0007483  | 0.0178272 | NIPSNAP3A   | -1.7717303 | 0.0002598 | 0.00988499  |
| CSNK1E         | 1.6618642 | 3.00E-05   | 0.0033581 | IPO8        | -1.7708858 | 0.0001456 | 0.007178896 |
| RGS5           | 1.6616144 | 9.09E-05   | 0.0056489 | SERPINB9P1  | -1.7701873 | 0.0005817 | 0.015565822 |
| ZNF329         | 1.6595071 | 0.00134693 | 0.0252983 | TMEM56      | -1.7692643 | 4.03E-05  | 0.003815031 |
| TROVE2         | 1.6581544 | 0.00045885 | 0.0133767 | L1CAM       | -1.7688683 | 0.0001252 | 0.006665686 |
| BAG5           | 1.6567946 | 2.25E-05   | 0.0028846 | ITGA6       | -1.7682665 | 0.0027293 | 0.038931458 |
| WDR72          | 1.6563018 | 0.00048609 | 0.0138423 | SPG20       | -1.7672448 | 0.0012166 | 0.023838202 |
| NGRN           | 1.6560989 | 1.77E-05   | 0.002618  | NEK7        | -1.7662814 | 0.0001029 | 0.006090806 |
| AC002310.12 /  | 1.6556655 | 0.00023095 | 0.0092102 | HGSNAT      | -1.7661957 | 0.000469  | 0.013573293 |
| FIGN           | 1.6548923 | 0.00123018 | 0.0239786 | KLRC4-KLRK1 | -1.7661934 | 0.0023139 | 0.035341431 |
| PQBP1          | 1.6548631 | 2.09E-05   | 0.0028293 | BTF3L4      | -1.7659688 | 0.000353  | 0.011574583 |
| HEIH           | 1.654342  | 1.56E-05   | 0.0024752 | ITPR1       | -1.7652936 | 0.002639  | 0.038211293 |
| STARD13        | 1.6535971 | 0.00032218 | 0.0110744 | SH3BP5      | -1.7649316 | 6.45E-05  | 0.004838351 |
| DNAH14         | 1.6534751 | 0.00016999 | 0.0077841 | TMEM106B    | -1.7648452 | 0.000459  | 0.013376681 |
| EPS15L1        | 1.6518002 | 7.95E-05   | 0.0053153 | BD495725    | -1.7645127 | 0.0011026 | 0.022485237 |
| ITGA2          | 1.6503494 | 0.00300854 | 0.0411791 | DPY19L1     | -1.7644656 | 5.05E-05  | 0.004316979 |
| MAML2          | 1.6499058 | 0.00187023 | 0.0308833 | ENOSF1      | -1.7635955 | 2.20E-05  | 0.002876143 |
| GEM            | 1.6493412 | 0.00222916 | 0.0344303 | USP46       | -1.7629339 | 3.70E-05  | 0.003662068 |
| RYBP           | 1.6489647 | 3.60E-05   | 0.0036339 | OAT         | -1.7626251 | 8.82E-05  | 0.005589584 |
| MIR3682        | 1.6482038 | 0.00401074 | 0.0491565 | CBX3        | -1.7622805 | 0.0007208 | 0.017460363 |
| ARMCX6         | 1.6478566 | 4.00E-05   | 0.0038029 | LOC1009967  | -1.7601421 | 0.001251  | 0.024219509 |
| FAM92A1        | 1.6460453 | 0.0001222  | 0.0066084 | USP10       | -1.7586583 | 0.0002983 | 0.010543002 |
| LOC102723721   | 1.6459957 | 0.00014721 | 0.0072186 | GNE         | -1.757397  | 1.64E-05  | 0.00251793  |
| LOC284023      | 1.645991  | 0.00028363 | 0.0102166 | Sep-07      | -1.7561806 | 0.0005269 | 0.014689997 |
| LATS2          | 1.6458184 | 0.00042331 | 0.0127517 | VPS13C      | -1.755917  | 0.0010526 | 0.021865751 |
| DDX19B         | 1.6457691 | 0.00012087 | 0.006583  | BOLA3       | -1.7551029 | 0.0008662 | 0.019360038 |

|                |           |            |           |               |            |           |             |
|----------------|-----------|------------|-----------|---------------|------------|-----------|-------------|
| BOLA2 /// LOC  | 1.6455171 | 0.00011194 | 0.0063422 | TMX1          | -1.7545428 | 0.000822  | 0.018922407 |
| ST7L           | 1.6443142 | 0.00011126 | 0.0063272 | CTTNBP2       | -1.7541971 | 0.0002124 | 0.008839765 |
| CFH            | 1.6443053 | 0.00026514 | 0.009977  | LRP4          | -1.7540791 | 0.0014456 | 0.026478842 |
| IFIT1          | 1.6438287 | 0.0015197  | 0.027251  | DDHD2         | -1.7532796 | 0.0002407 | 0.009419935 |
| ADORA2B        | 1.6424229 | 0.00031507 | 0.0109373 | ALDH2         | -1.7527184 | 0.0004266 | 0.012823513 |
| SEC14L1        | 1.64167   | 0.00233209 | 0.0354875 | DGKQ          | -1.752617  | 1.37E-05  | 0.002388507 |
| LOC374443      | 1.6408868 | 0.00087153 | 0.0194019 | NBPF20        | -1.752367  | 9.76E-05  | 0.005890001 |
| TRIB1          | 1.6407971 | 2.19E-05   | 0.0028761 | RPL35A        | -1.7517182 | 6.39E-05  | 0.004817108 |
| MRPS31         | 1.6403151 | 4.56E-05   | 0.0040474 | LOC10050610   | -1.7513873 | 0.0001721 | 0.007841615 |
| FBXO28         | 1.6396011 | 0.00019148 | 0.0084225 | LUM           | -1.7506852 | 0.0008422 | 0.019090198 |
| FAM120C        | 1.639598  | 8.13E-05   | 0.0053813 | LITAF         | -1.750135  | 0.0003263 | 0.011158301 |
| MSL2           | 1.6390746 | 2.80E-05   | 0.0032529 | FKBP5         | -1.749615  | 1.24E-05  | 0.002364945 |
| LOC100506990   | 1.638195  | 0.00026918 | 0.0100324 | TMED4         | -1.7492675 | 6.49E-05  | 0.004850755 |
| MSRB3          | 1.6381325 | 0.00191255 | 0.0313199 | MARCKSL1      | -1.7471293 | 2.02E-05  | 0.002807439 |
| CSF2RA         | 1.637709  | 0.00160435 | 0.0281265 | SESN1         | -1.7469264 | 0.0002061 | 0.008702401 |
| OSBPL3         | 1.6374892 | 0.0006777  | 0.0168558 | RABGAP1L      | -1.7467027 | 0.0002099 | 0.008760619 |
| ARL4C          | 1.6360885 | 0.00366454 | 0.0464439 | COL1A1        | -1.7456182 | 0.0013332 | 0.02511848  |
| SLC16A6        | 1.6350304 | 0.00289014 | 0.0403211 | TLR3          | -1.7449123 | 0.0013797 | 0.025657504 |
| ZFAS1          | 1.6350243 | 1.76E-05   | 0.002618  | NUDT5         | -1.7447411 | 1.26E-05  | 0.002364945 |
| STEAP1         | 1.6344027 | 0.00104179 | 0.0217074 | TXNDC16       | -1.744195  | 0.0001172 | 0.006468963 |
| FNDC3B /// LO  | 1.6338159 | 0.0003585  | 0.0116742 | CDON          | -1.7441173 | 3.48E-05  | 0.00357392  |
| BCDIN3D        | 1.6336647 | 2.95E-05   | 0.0033306 | RP11-445H22   | -1.7439973 | 4.56E-05  | 0.004047384 |
| CLCN4          | 1.6315084 | 0.00139399 | 0.025836  | RBBP4         | -1.7435804 | 4.33E-05  | 0.003972406 |
| RP11-499E18.1  | 1.6308454 | 0.00012104 | 0.0065849 | TMEM187       | -1.7425289 | 0.0005777 | 0.015512469 |
| SNHG5 /// SNC  | 1.6304406 | 7.46E-05   | 0.0051461 | PREX1         | -1.7421446 | 0.0002838 | 0.010216631 |
| PLAUR          | 1.6299049 | 0.00018041 | 0.0080589 | ALDH9A1       | -1.7421383 | 9.91E-06  | 0.002176613 |
| SLC16A1-AS1    | 1.6285899 | 9.00E-05   | 0.0056149 | GCH1          | -1.7420101 | 4.51E-05  | 0.004031448 |
| SGK223         | 1.6285013 | 0.00026205 | 0.0099007 | ZNF627        | -1.7419738 | 0.0006152 | 0.016041275 |
| DNAJB6         | 1.6280831 | 0.00086235 | 0.0192917 | SEL1L         | -1.7403013 | 0.0001517 | 0.007355031 |
| CYSRT1         | 1.6264107 | 0.0023646  | 0.0357719 | ANKRD46       | -1.7397815 | 7.84E-05  | 0.005273797 |
| MED10          | 1.6257944 | 0.00012777 | 0.0067169 | FGFR2         | -1.7393609 | 0.0007535 | 0.017907631 |
| BC062763       | 1.625161  | 0.00019077 | 0.0084097 | PCBP2         | -1.7392104 | 3.77E-05  | 0.00368328  |
| FAM126A        | 1.6249836 | 4.88E-05   | 0.0042382 | RPL13A /// ST | -1.7391992 | 3.35E-05  | 0.003526393 |
| LHX4           | 1.6249283 | 0.00040721 | 0.0124382 | GTF2H1        | -1.7368495 | 0.0004678 | 0.013548008 |
| IFIT3          | 1.6236987 | 0.0004333  | 0.012903  | SLC30A9       | -1.736431  | 0.0015637 | 0.027732951 |
| KIN            | 1.6224804 | 0.0003599  | 0.011692  | CSTF3         | -1.7364061 | 0.0001245 | 0.006662219 |
| DGAT2          | 1.6220883 | 0.00038109 | 0.0120313 | MED13L        | -1.7360433 | 6.57E-05  | 0.004889286 |
| EMP3           | 1.6209199 | 0.00015077 | 0.007329  | MINK1         | -1.7356276 | 1.06E-05  | 0.002192581 |
| NCR3LG1 /// R  | 1.6206879 | 5.55E-05   | 0.004509  | DQ597730 ///  | -1.7347893 | 0.000794  | 0.01852135  |
| DPCD           | 1.619143  | 0.000164   | 0.007657  | TPGS2         | -1.7330751 | 0.0002142 | 0.008887581 |
| STAG3L2 /// ST | 1.6188877 | 0.00095641 | 0.0205676 | SOAT1         | -1.7328673 | 0.0003367 | 0.011338601 |
| VPS37A         | 1.6182431 | 0.00092625 | 0.0201167 | CAND1         | -1.7321235 | 0.0003615 | 0.011695514 |
| SIX2           | 1.617398  | 0.00012346 | 0.0066308 | EMP2          | -1.7320126 | 0.0012139 | 0.023806163 |
| CHST11         | 1.6173306 | 0.00097463 | 0.0208156 | GXYLT1        | -1.731148  | 0.0028257 | 0.03970534  |
| TUFT1          | 1.6171129 | 0.00073043 | 0.0175699 | TMEM14A       | -1.730631  | 7.27E-05  | 0.005090632 |
| NOG            | 1.6168593 | 0.00341053 | 0.0444084 | SAMD11        | -1.7292524 | 0.0015592 | 0.027688158 |
| MRPS22         | 1.6166494 | 1.95E-05   | 0.0027567 | SULF2         | -1.7275495 | 4.42E-05  | 0.003998859 |
| FAM216A        | 1.6159588 | 4.81E-05   | 0.0041851 | SUSD2         | -1.7257853 | 3.46E-05  | 0.00357392  |
| IRF2BP2        | 1.6154582 | 5.28E-05   | 0.0044445 | AF520793      | -1.7214192 | 0.0014744 | 0.026772861 |
| HERC5          | 1.6146282 | 0.00037282 | 0.0119066 | G3BP2         | -1.7198813 | 2.39E-05  | 0.002987084 |

|               |           |            |           |               |            |           |             |
|---------------|-----------|------------|-----------|---------------|------------|-----------|-------------|
| TLDC1         | 1.6145846 | 4.38E-05   | 0.0039882 | IKZF4         | -1.7198232 | 2.30E-05  | 0.002906845 |
| GPATCH2       | 1.6139729 | 0.00220309 | 0.0342589 | DNAJC10       | -1.7192388 | 1.58E-05  | 0.002483128 |
| GPC5          | 1.6131462 | 0.0014962  | 0.0270072 | LAMP2         | -1.7189169 | 4.50E-05  | 0.004027564 |
| TRIM8         | 1.6112259 | 0.00010849 | 0.0062562 | CXXC5         | -1.7175048 | 2.26E-05  | 0.002884643 |
| TMOD3         | 1.6111738 | 0.00249125 | 0.036943  | GNPTAB        | -1.7172265 | 0.0002196 | 0.009015824 |
| ZNF300        | 1.6103965 | 0.00279082 | 0.0394591 | LPIN1         | -1.7171492 | 0.0004699 | 0.013573293 |
| ANKRD28       | 1.6101772 | 0.00034988 | 0.0115374 | MANEA         | -1.7170198 | 8.15E-05  | 0.005381287 |
| RALGAPA1 ///  | 1.6098456 | 0.00036059 | 0.0116941 | RP11-649A18   | -1.7164289 | 7.37E-05  | 0.005125028 |
| SETD7         | 1.6089086 | 0.00083828 | 0.0190652 | ZNF385B       | -1.7159994 | 0.0002646 | 0.009968763 |
| DUS3L         | 1.6083635 | 0.00011383 | 0.0063956 | UNC5D         | -1.7155903 | 0.0003073 | 0.010768791 |
| XRCC4         | 1.6075229 | 0.00122568 | 0.0239105 | MED31         | -1.7153431 | 0.0020557 | 0.032767703 |
| CEP41         | 1.6066031 | 5.34E-05   | 0.0044857 | SNRNP70       | -1.7142163 | 2.49E-05  | 0.003037316 |
| EIF1          | 1.6065199 | 3.25E-05   | 0.0034746 | PGAP1         | -1.7141692 | 0.0016045 | 0.028126499 |
| CDC42EP3      | 1.6065049 | 0.00202435 | 0.0324285 | SLC16A1       | -1.7134139 | 3.68E-05  | 0.003662068 |
| BATF3         | 1.6046128 | 6.41E-05   | 0.0048264 | TRAPPC10      | -1.7123362 | 0.000201  | 0.008561898 |
| LOC100506844  | 1.6043816 | 8.15E-05   | 0.0053813 | CHMP3 /// R   | -1.7122512 | 1.47E-05  | 0.002418661 |
| CYSLTR1       | 1.6036598 | 0.00081849 | 0.0188742 | NR2F1         | -1.7116461 | 0.0001574 | 0.007478699 |
| CCNB1IP1      | 1.6035638 | 5.85E-05   | 0.0045827 | FAM122B       | -1.7110296 | 0.0002759 | 0.010127117 |
| CSNK1A1       | 1.6032924 | 4.20E-05   | 0.0039029 | CCNG1         | -1.7091621 | 3.05E-05  | 0.003384387 |
| BRD2          | 1.6032433 | 3.54E-05   | 0.0036017 | BCLAF1        | -1.7083972 | 6.90E-05  | 0.00496591  |
| RAD1          | 1.6025528 | 3.40E-05   | 0.0035417 | RBM3          | -1.7082396 | 0.0003543 | 0.011587224 |
| DNAJC17       | 1.601362  | 6.74E-05   | 0.0049496 | CRABP2        | -1.7066678 | 0.0034996 | 0.045082181 |
| SGK494        | 1.6011761 | 0.00328054 | 0.0433559 | PAK1          | -1.7060412 | 0.000382  | 0.012046946 |
| EVA1A         | 1.6011433 | 0.00088029 | 0.0195175 | HSPBAP1       | -1.7045896 | 0.0002162 | 0.008915418 |
| MRPS30        | 1.6004995 | 4.70E-05   | 0.004141  | SCNN1A        | -1.7043867 | 0.0036154 | 0.046066705 |
| LOC100630923  | 1.5991414 | 0.00041484 | 0.0125727 | NEURL1B       | -1.7042742 | 0.0006573 | 0.016606486 |
| SMCHD1        | 1.5980424 | 0.002145   | 0.0336963 | BPHL          | -1.7035235 | 0.0001709 | 0.00781726  |
| HERC3 /// LOC | 1.5979776 | 0.00416962 | 0.0502592 | CLIC3         | -1.7029069 | 0.0007116 | 0.017375903 |
| BAD           | 1.5979393 | 0.00022973 | 0.0091783 | GALNT6        | -1.7014637 | 5.71E-05  | 0.004551083 |
| MLH3          | 1.5977786 | 3.25E-05   | 0.0034746 | JDP2          | -1.700482  | 0.0003276 | 0.011165662 |
| LINC01128     | 1.5976109 | 0.00333986 | 0.0438052 | SLC35E2 /// S | -1.7004242 | 0.000114  | 0.00639562  |
| IDS           | 1.5973176 | 5.89E-05   | 0.0045827 | NELL2         | -1.7003565 | 0.0006305 | 0.016261635 |
| NUDT6         | 1.5966953 | 0.00040988 | 0.0124778 | FGD6          | -1.6994084 | 0.000561  | 0.015207124 |
| HES1          | 1.5955724 | 0.00019338 | 0.0084719 | SLFN5         | -1.6993355 | 0.0007234 | 0.017489048 |
| DYNLL1-AS1    | 1.5951082 | 0.00158483 | 0.0279405 | ME1           | -1.6988883 | 0.0001954 | 0.008471931 |
| SOCS5         | 1.5949288 | 0.0020268  | 0.0324305 | CD99L2        | -1.6954199 | 0.0002075 | 0.008739345 |
| ZCCHC7        | 1.5938969 | 0.00014143 | 0.0070773 | ARHGEF26      | -1.695103  | 0.0002138 | 0.008875765 |
| TCEB3-AS1     | 1.5937758 | 0.00029479 | 0.010477  | DLX4          | -1.6946013 | 0.0003385 | 0.011360387 |
| MCM3AP-AS1    | 1.5933817 | 0.00107251 | 0.0220666 | HPS3          | -1.6943925 | 1.89E-05  | 0.002714957 |
| CCDC58        | 1.5929231 | 7.27E-05   | 0.0050906 | ORAOV1        | -1.6940546 | 0.0001816 | 0.008091554 |
| LIFR          | 1.5919166 | 0.00382119 | 0.0477322 | PRKACB        | -1.6940518 | 4.78E-05  | 0.004184109 |
| ZNF451        | 1.5909267 | 0.00034276 | 0.01141   | HPD           | -1.6926159 | 0.0001201 | 0.006580369 |
| HOTAIRM1      | 1.5896801 | 9.02E-05   | 0.0056149 | DAB1 /// OM   | -1.6922661 | 1.78E-05  | 0.002631582 |
| LEMD2         | 1.5886697 | 0.00022578 | 0.0091373 | STXBP4        | -1.6915349 | 6.84E-05  | 0.004953055 |
| ZNF420        | 1.5882969 | 0.00019709 | 0.0085105 | SMPDL3A       | -1.6910369 | 0.0001117 | 0.006337688 |
| MRPL42        | 1.5881963 | 3.60E-05   | 0.0036339 | DEGS1         | -1.690865  | 0.0002433 | 0.009498956 |
| TSSC4         | 1.5881623 | 0.00013221 | 0.0068254 | MYD88         | -1.6898357 | 2.19E-05  | 0.002876143 |
| PDGFA         | 1.588099  | 0.00389601 | 0.0483464 | PTN           | -1.6893264 | 0.0004061 | 0.012438224 |
| AKNAD1        | 1.5868516 | 0.00394488 | 0.0486328 | HSPA13        | -1.6892398 | 0.0002764 | 0.010127117 |
| DHPS          | 1.5866013 | 0.00022852 | 0.0091733 | KBTBD7        | -1.6890621 | 0.0038887 | 0.048310761 |

|                |           |            |           |              |            |           |             |
|----------------|-----------|------------|-----------|--------------|------------|-----------|-------------|
| CCDC91         | 1.5863068 | 0.00019535 | 0.0084719 | CEP68        | -1.6882174 | 4.98E-05  | 0.00430162  |
| BAIAP2         | 1.5862492 | 5.41E-05   | 0.0044917 | ALDH3A2      | -1.6881433 | 0.000408  | 0.012452846 |
| CD44           | 1.5862178 | 0.00147766 | 0.0268062 | FAM135A      | -1.6873785 | 8.89E-05  | 0.005601897 |
| DAAM1          | 1.5854829 | 0.00024981 | 0.0096754 | PLA2G3       | -1.6873307 | 0.0003125 | 0.010883372 |
| XPA            | 1.5852046 | 3.52E-05   | 0.0035942 | HTRA3        | -1.6841657 | 0.0001445 | 0.007164996 |
| PAWR           | 1.5851247 | 0.00018538 | 0.008227  | PRPF40A      | -1.6833193 | 0.0003309 | 0.011222563 |
| ZNF322         | 1.5843377 | 0.00158802 | 0.027963  | BRD3         | -1.6801657 | 0.0003109 | 0.010849207 |
| PPP1R10        | 1.5835763 | 0.00034011 | 0.0113884 | SERPINB5     | -1.6801335 | 0.0001423 | 0.007077318 |
| TCN1           | 1.583313  | 0.00015798 | 0.0074858 | SEPP1        | -1.679629  | 0.0020132 | 0.032365102 |
| TNFRSF10A      | 1.5832955 | 0.00028325 | 0.0102166 | LINC00165    | -1.6788951 | 0.0001978 | 0.008517107 |
| LYPD1          | 1.5832235 | 0.00209998 | 0.0332511 | PRKX /// PRK | -1.6777586 | 7.70E-05  | 0.005239499 |
| PAFAH1B1       | 1.5830099 | 3.19E-05   | 0.0034617 | OIP5-AS1     | -1.6772169 | 0.000258  | 0.009829718 |
| NRF1           | 1.5824834 | 0.00055947 | 0.0151806 | CLDN7        | -1.6771899 | 0.0015852 | 0.027940456 |
| HIVEP1         | 1.5821561 | 0.00034097 | 0.0113884 | LINC00478    | -1.6770288 | 0.0002975 | 0.010539318 |
| CHD9           | 1.5816969 | 0.00104176 | 0.0217074 | RAVER2       | -1.6769342 | 0.0033351 | 0.043791212 |
| AFAP1L1        | 1.5810609 | 0.0003903  | 0.0121803 | LAPTM4A      | -1.6765284 | 8.08E-05  | 0.005381287 |
| ZNF33A         | 1.5805435 | 0.00026844 | 0.010029  | F2RL2        | -1.676382  | 0.0011357 | 0.022812343 |
| SNHG11 /// SN  | 1.5805068 | 0.00070121 | 0.0172153 | SECISBP2     | -1.6751029 | 0.0001248 | 0.00666347  |
| PDXK           | 1.5803134 | 0.00028701 | 0.01029   | LGR4         | -1.6745485 | 0.0010619 | 0.021934004 |
| AP2B1          | 1.5802561 | 0.00017898 | 0.0080278 | LOC1027243   | -1.6741782 | 0.0013428 | 0.025244729 |
| PATZ1          | 1.5801865 | 0.00010922 | 0.0062726 | AGPAT5       | -1.6734392 | 5.55E-05  | 0.004509022 |
| FAM200B        | 1.5795573 | 0.00383438 | 0.047857  | DYNC1I2      | -1.6721084 | 0.0004741 | 0.013628732 |
| CDK8           | 1.5793227 | 0.00027461 | 0.0101271 | ABCB10       | -1.6712836 | 0.0005029 | 0.014181763 |
| CDK17          | 1.5792878 | 0.00123983 | 0.0240808 | PDE7A        | -1.6687323 | 0.0006106 | 0.015989757 |
| ERCC1          | 1.5788184 | 0.0002015  | 0.0085651 | SLC9A3R1     | -1.6681258 | 2.64E-05  | 0.003114349 |
| HIVEP2         | 1.5781145 | 0.00173167 | 0.0294807 | KLHL41       | -1.6673685 | 0.0026708 | 0.038448664 |
| MUC13          | 1.5779825 | 0.0024172  | 0.0362679 | ZMAT3        | -1.6673263 | 4.35E-05  | 0.003973143 |
| MALT1          | 1.577677  | 0.00075463 | 0.0179076 | SSH3         | -1.6672964 | 0.0001839 | 0.008175558 |
| ZNF585B        | 1.5775507 | 0.00065782 | 0.0166065 | OPA1         | -1.6671011 | 0.0001073 | 0.006215054 |
| GTPBP10 /// LC | 1.5773019 | 8.91E-05   | 0.0056041 | PARVB        | -1.666597  | 0.000627  | 0.016209008 |
| SULF1          | 1.5770042 | 7.25E-05   | 0.0050906 | TACC1        | -1.6665362 | 0.0030262 | 0.041271441 |
| CCDC88C        | 1.5759627 | 0.00128917 | 0.0245937 | SCD          | -1.666123  | 0.0019955 | 0.032171034 |
| METTL12 /// SN | 1.5757533 | 7.88E-05   | 0.0052779 | OGDH         | -1.6649925 | 0.0001499 | 0.007310186 |
| MYNN           | 1.5756638 | 0.00016876 | 0.0077797 | RNASEH2C     | -1.664705  | 7.83E-05  | 0.005273797 |
| SYNE1          | 1.5755672 | 0.00128513 | 0.0245508 | B4GALNT1     | -1.6639748 | 0.0002549 | 0.009772891 |
| H2AFJ          | 1.5754553 | 0.00085998 | 0.0192917 | TM9SF3       | -1.6636069 | 2.84E-05  | 0.003261239 |
| USP36          | 1.5746594 | 0.00036068 | 0.0116941 | TBC1D16      | -1.6629215 | 2.84E-05  | 0.003261239 |
| FAM168B        | 1.5742974 | 0.00412093 | 0.0499805 | TP53INP2     | -1.6620385 | 0.0002976 | 0.010539318 |
| RBMS1          | 1.5742321 | 0.00012915 | 0.0067678 | LDLRAD4      | -1.6619693 | 0.0001101 | 0.006302674 |
| C1orf86        | 1.5742113 | 0.00157214 | 0.0278087 | ZFYVE21      | -1.6619316 | 0.0002734 | 0.010108197 |
| SH3BGRL3       | 1.5738807 | 8.08E-05   | 0.0053813 | LOC1005075   | -1.6607251 | 9.69E-05  | 0.005863235 |
| ZBTB47         | 1.5732565 | 0.00098219 | 0.0208873 | BLVRA        | -1.660672  | 0.0002354 | 0.009325151 |
| RNF212         | 1.5728419 | 9.15E-05   | 0.0056647 | DPYSL2       | -1.6598972 | 7.62E-05  | 0.00521106  |
| RUNX3          | 1.5720983 | 0.00047028 | 0.0135733 | TNS3         | -1.6593657 | 0.0006591 | 0.016613394 |
| ETV5           | 1.5720176 | 0.00372131 | 0.0469457 | C1orf85      | -1.6592646 | 0.0001919 | 0.00843615  |
| CLEC2B         | 1.5715299 | 0.00039284 | 0.0122174 | EGLN3        | -1.6591411 | 0.0001224 | 0.006608733 |
| AP4S1          | 1.5714368 | 0.00029763 | 0.0105393 | FAM111B      | -1.6581642 | 0.0005808 | 0.015565822 |
| FZD8 /// MIR46 | 1.5708903 | 0.00120871 | 0.0237635 | PPIG         | -1.6568021 | 6.67E-05  | 0.004922551 |
| JUP            | 1.5703278 | 0.00051682 | 0.0144833 | RP11-182L21  | -1.6565937 | 0.0018669 | 0.030868648 |
| TMEM39B        | 1.570055  | 0.00028196 | 0.0102041 | TMCO3        | -1.6553995 | 0.0004069 | 0.012438224 |

|              |           |            |           |               |            |           |             |
|--------------|-----------|------------|-----------|---------------|------------|-----------|-------------|
| HCAR3        | 1.5691116 | 0.00113536 | 0.0228123 | EID2B         | -1.6547176 | 5.17E-05  | 0.004393137 |
| YBEY         | 1.5687758 | 0.00010717 | 0.0062151 | HIST2H2BE     | -1.6542175 | 0.0003528 | 0.011574583 |
| SPANXB1      | 1.568673  | 0.00270072 | 0.0386218 | CAAP1         | -1.6540316 | 0.0007071 | 0.017289212 |
| PSTK         | 1.5685647 | 0.00130447 | 0.0247732 | PPIC          | -1.6528582 | 9.42E-05  | 0.005806079 |
| AADACP1      | 1.5683491 | 0.00188753 | 0.0310683 | IRAK1BP1      | -1.6526076 | 0.0001741 | 0.007905684 |
| POT1         | 1.5682702 | 4.41E-05   | 0.0039989 | RP11-127B20   | -1.6516818 | 0.0001275 | 0.006716938 |
| SPOCK1       | 1.5678744 | 0.00019365 | 0.0084719 | TAF7L         | -1.6512156 | 0.0025577 | 0.037456511 |
| YAE1D1       | 1.5677677 | 6.81E-05   | 0.0049531 | AKT1          | -1.6503723 | 5.92E-05  | 0.004582711 |
| PTPN12       | 1.5672603 | 0.00074471 | 0.0177514 | MRGPRF        | -1.649996  | 0.0001959 | 0.008481046 |
| CAPN15       | 1.5670394 | 0.00012436 | 0.0066622 | PAPD4         | -1.6499857 | 0.002201  | 0.034240689 |
| GOSR2        | 1.5665964 | 0.00015001 | 0.0073102 | HNRNPLL       | -1.6496903 | 0.0008312 | 0.019004831 |
| DR1          | 1.5665332 | 0.00010379 | 0.0061151 | C6orf62       | -1.6492713 | 2.61E-05  | 0.003092269 |
| MEX3C        | 1.5650933 | 0.00150696 | 0.0271209 | WDR61         | -1.6491758 | 0.0020518 | 0.032734332 |
| LANCL2       | 1.5644404 | 0.00033065 | 0.0112216 | SKAP2         | -1.6484797 | 7.40E-05  | 0.005126027 |
| SOCS6        | 1.5643144 | 0.00296916 | 0.0409258 | GATSL2        | -1.6472901 | 0.0008902 | 0.019640947 |
| SVIL         | 1.564187  | 0.00086235 | 0.0192917 | BRI3BP /// TH | -1.6472186 | 2.97E-05  | 0.003339129 |
| TRAF3IP2-AS1 | 1.5640616 | 0.00275129 | 0.0391097 | RP11-196G18   | -1.6462948 | 0.0026079 | 0.037958404 |
| DDRGK1       | 1.5639457 | 0.00012721 | 0.0067169 | TNFAIP8       | -1.6459727 | 0.001048  | 0.021810731 |
| RUNDC1       | 1.5638166 | 0.00015325 | 0.0073918 | PEX1          | -1.6456028 | 0.0001738 | 0.007905232 |
| YAP1         | 1.5637999 | 0.0006713  | 0.0167517 | SNORD89       | -1.6449915 | 0.0002206 | 0.009029277 |
| ABL2         | 1.5633683 | 0.00045939 | 0.0133786 | RMDN2         | -1.6449745 | 0.000613  | 0.016013361 |
| MAGI1        | 1.5629304 | 0.00034861 | 0.0115237 | PDGFD         | -1.6449014 | 0.0009746 | 0.020815649 |
| COL12A1      | 1.5628085 | 7.29E-05   | 0.0050978 | HIGD1A        | -1.6417215 | 0.0029326 | 0.040653469 |
| ZNF174       | 1.5627689 | 5.26E-05   | 0.0044443 | ADAM10        | -1.6414756 | 0.0012047 | 0.02370205  |
| ASPHD1       | 1.5623913 | 6.97E-05   | 0.0049876 | AGPS          | -1.6405815 | 0.0001395 | 0.007044168 |
| ZNF346       | 1.5614719 | 0.00175994 | 0.029754  | TPCN2         | -1.6402382 | 0.0001304 | 0.006808175 |
| DPF2         | 1.5614537 | 5.79E-05   | 0.0045603 | HPSE          | -1.6400352 | 0.000118  | 0.00649501  |
| ZNF165       | 1.56117   | 0.00300025 | 0.0411434 | ULK1          | -1.6398761 | 0.0017226 | 0.029385867 |
| ETV6         | 1.5609283 | 0.00024241 | 0.0094803 | OSBPL7        | -1.6395732 | 0.0010892 | 0.022312312 |
| KLF4         | 1.5603368 | 0.00025217 | 0.0097195 | FRAT2         | -1.6395223 | 4.89E-05  | 0.004238963 |
| MOSPD1       | 1.5601335 | 0.00049601 | 0.0140586 | KIF26A        | -1.6385738 | 5.48E-05  | 0.004508253 |
| CDH2         | 1.557959  | 0.00086778 | 0.0193735 | GM2A          | -1.6382928 | 0.0008453 | 0.01912995  |
| COPZ1        | 1.5577598 | 6.17E-05   | 0.0046954 | PTGR2         | -1.63728   | 0.003777  | 0.047397782 |
| OSGEPL1      | 1.5576489 | 0.00012012 | 0.0065804 | MARCKS        | -1.6367191 | 3.78E-05  | 0.00368328  |
| LYAR         | 1.5576122 | 0.00059788 | 0.0158146 | ATP8B2        | -1.6366329 | 0.0003382 | 0.011358378 |
| FSD1L        | 1.5575071 | 0.00361137 | 0.0460475 | PCSK9         | -1.6361162 | 0.0008453 | 0.01912995  |
| WDR73        | 1.5574218 | 0.00012061 | 0.006583  | GAS1          | -1.6353008 | 0.0028623 | 0.040055898 |
| RHEBL1       | 1.5565404 | 0.00022275 | 0.0090605 | ILF3          | -1.6352602 | 7.00E-05  | 0.004994232 |
| NCF2         | 1.5561417 | 0.00066212 | 0.0166321 | SEL1L3        | -1.6346035 | 0.0003311 | 0.011222563 |
| FANCF        | 1.5558073 | 0.00022981 | 0.0091783 | PTPN14        | -1.6326769 | 0.00354   | 0.045434347 |
| CGRRF1       | 1.5551827 | 0.00034731 | 0.0114945 | FAM114A1      | -1.6311476 | 0.0002379 | 0.009349125 |
| OGT          | 1.5543788 | 0.00145245 | 0.0265682 | FLRT3         | -1.6300663 | 0.0004709 | 0.013580154 |
| CSRNP1       | 1.5526274 | 7.59E-05   | 0.0051967 | MBOAT1        | -1.6295418 | 0.0001332 | 0.006848257 |
| PPM1A        | 1.5523083 | 0.00280966 | 0.0396121 | TMEM41B       | -1.6292421 | 3.95E-05  | 0.003790056 |
| MRPS10       | 1.5522874 | 8.10E-05   | 0.0053813 | MAP4K4        | -1.6289803 | 0.000434  | 0.0129101   |
| KLF6         | 1.5521026 | 0.00081373 | 0.0188041 | SUGP2         | -1.6287905 | 0.0012178 | 0.023838794 |
| RNF6         | 1.5515973 | 0.00262358 | 0.0380792 | LOC10272420   | -1.6283748 | 0.0007772 | 0.018246002 |
| TBC1D30      | 1.551514  | 0.00398327 | 0.0489404 | LMO4          | -1.6264068 | 0.001817  | 0.030324436 |
| TMEM182      | 1.5512252 | 8.47E-05   | 0.0054912 | WDR11         | -1.6263758 | 0.0019001 | 0.031178152 |
| MXD1         | 1.5510696 | 0.00397299 | 0.0488582 | DKFZP434I07   | -1.6256493 | 7.55E-05  | 0.005184495 |

|                |           |            |           |              |            |           |             |
|----------------|-----------|------------|-----------|--------------|------------|-----------|-------------|
| SERPINE1       | 1.5510604 | 0.00050379 | 0.0141837 | CERS5        | -1.6245242 | 0.0001357 | 0.006941753 |
| TSC22D1        | 1.5509901 | 0.00022399 | 0.0090883 | MOB1A        | -1.6243121 | 0.0035695 | 0.045727057 |
| ARHGEF28       | 1.5509366 | 0.00397032 | 0.0488473 | KDEL2        | -1.6239844 | 3.73E-05  | 0.00368328  |
| PPP2R3C        | 1.5507992 | 9.01E-05   | 0.0056149 | SERPINB6     | -1.6236963 | 0.0001649 | 0.007684682 |
| NECAP2         | 1.5500822 | 0.00012295 | 0.0066294 | CTD-3092A11  | -1.6215599 | 0.0004056 | 0.012438224 |
| CCDC113        | 1.5499034 | 0.00043326 | 0.012903  | TMEM47       | -1.6213532 | 0.0026916 | 0.038589217 |
| IRAK1          | 1.5492706 | 6.25E-05   | 0.0047345 | PIGG         | -1.6206758 | 6.86E-05  | 0.00495918  |
| PDE6D          | 1.5489666 | 0.0002695  | 0.0100345 | DICER1       | -1.620142  | 0.0017644 | 0.029766324 |
| RPF2           | 1.5481452 | 0.00022648 | 0.0091519 | TSPAN3       | -1.6192842 | 0.0001263 | 0.00669642  |
| HCG18          | 1.5473814 | 0.00148745 | 0.0268936 | EPB41        | -1.6191435 | 3.56E-05  | 0.003616699 |
| IL1R1          | 1.5458849 | 0.00225318 | 0.0347315 | SLC47A1      | -1.6190411 | 2.96E-05  | 0.003330777 |
| TXNL4B         | 1.5452967 | 0.00016706 | 0.0077342 | UBE2I        | -1.6181053 | 5.67E-05  | 0.004543098 |
| NFXL1          | 1.5447933 | 0.00173299 | 0.0294807 | CALM1 /// CA | -1.6179801 | 3.10E-05  | 0.0034191   |
| EYA3           | 1.54449   | 8.28E-05   | 0.0054148 | MTG2         | -1.6172789 | 0.0006143 | 0.016032582 |
| CHRM3          | 1.5440308 | 0.00024928 | 0.0096661 | TRIM34 /// T | -1.6164308 | 0.000514  | 0.014410462 |
| CYB5D1         | 1.5439967 | 0.00022705 | 0.0091569 | FAR2         | -1.6164066 | 0.001001  | 0.021188113 |
| PDLIM5         | 1.543125  | 0.00395695 | 0.0487157 | GALM         | -1.6163848 | 0.0001113 | 0.006327189 |
| RAD23A         | 1.543049  | 8.72E-05   | 0.0055813 | GNAS         | -1.615633  | 0.0006601 | 0.016623647 |
| FAM174A        | 1.5428467 | 0.0005671  | 0.0153251 | ASF1B        | -1.6148308 | 4.00E-05  | 0.003802895 |
| LOC101927746   | 1.5426771 | 0.00199587 | 0.032171  | SFT2D2       | -1.6140563 | 0.000107  | 0.006215054 |
| PTGR2 /// ZNF4 | 1.5424369 | 6.34E-05   | 0.0047895 | TRIM36       | -1.6140405 | 0.0028125 | 0.039612119 |
| KLF7           | 1.5422364 | 0.00176232 | 0.0297566 | AGO1         | -1.6137448 | 0.0004567 | 0.013337351 |
| NFATC2         | 1.5420875 | 0.00041108 | 0.0124945 | SLC38A10     | -1.6128193 | 0.0004177 | 0.012624781 |
| THOC6          | 1.5414172 | 0.00076688 | 0.0181057 | SLC44A1      | -1.6125307 | 0.0008446 | 0.01912995  |
| SERTAD1        | 1.5412132 | 0.00084703 | 0.0191606 | SMIM19       | -1.6124712 | 4.19E-05  | 0.003902876 |
| FIP1L1         | 1.540891  | 0.00136876 | 0.0255182 | DHFR1        | -1.6122858 | 0.0019628 | 0.031815798 |
| SMIM11         | 1.5408048 | 0.00065507 | 0.0166045 | ACTR3C       | -1.6120277 | 0.0002987 | 0.010549097 |
| ITGB5          | 1.540533  | 0.00253785 | 0.0372955 | SHISA5       | -1.6115895 | 0.000407  | 0.012438224 |
| LOC339803      | 1.540367  | 7.79E-05   | 0.0052738 | LGALS3BP     | -1.6112474 | 2.91E-05  | 0.003328475 |
| MARK3          | 1.5403549 | 0.00031038 | 0.0108434 | SLC25A51     | -1.6105149 | 0.0001973 | 0.008510469 |
| PAPPA          | 1.5402353 | 0.00413387 | 0.0500518 | GPALPP1      | -1.6096394 | 0.0001533 | 0.007391792 |
| DPH5           | 1.5400244 | 0.00017951 | 0.0080446 | PCNA         | -1.6095948 | 2.26E-05  | 0.002884643 |
| EGFLAM         | 1.5399402 | 0.00015439 | 0.0074371 | IL10RB       | -1.6078802 | 7.32E-05  | 0.005097785 |
| GABPB1         | 1.5399126 | 0.00039266 | 0.0122174 | LOC1027244   | -1.6048712 | 0.0005413 | 0.01489089  |
| WDR53          | 1.5395425 | 0.00076791 | 0.0181205 | AMACR /// C  | -1.6047106 | 0.0004506 | 0.01321027  |
| TCF12          | 1.5390775 | 0.00031458 | 0.0109342 | FAIM         | -1.6023072 | 6.43E-05  | 0.004838351 |
| TMEM167B       | 1.5383561 | 0.00013175 | 0.0068254 | CYP51A1 ///  | -1.6020781 | 3.69E-05  | 0.003662068 |
| ZNF277         | 1.537965  | 0.00176281 | 0.0297566 | PTPN13       | -1.6019964 | 0.00011   | 0.006302674 |
| CPEB2          | 1.5370427 | 0.00157836 | 0.0278764 | PGD          | -1.6018619 | 0.000117  | 0.006468963 |
| EIF1AD         | 1.5363285 | 0.00090304 | 0.0198176 | SENP2        | -1.6017958 | 0.0014845 | 0.026857594 |
| DUS4L          | 1.5362652 | 0.00200864 | 0.0323232 | SMC6         | -1.6011738 | 0.0020453 | 0.032659469 |
| EPS8L1         | 1.5361198 | 0.00012745 | 0.0067169 | SLC30A4      | -1.6000675 | 0.0001672 | 0.007734689 |
| TRAPPC13       | 1.5360672 | 0.00302364 | 0.0412571 | RRM2         | -1.598825  | 0.0001263 | 0.00669642  |
| PBX2           | 1.5356531 | 0.00012469 | 0.0066635 | DIP2A        | -1.598668  | 0.0016572 | 0.028756638 |
| FBN1           | 1.535509  | 0.0003006  | 0.0106006 | TMF1         | -1.5982086 | 0.0006514 | 0.016550154 |
| MURC           | 1.5350709 | 0.00047918 | 0.0137095 | TSPAN6       | -1.5979555 | 0.0002751 | 0.010127117 |
| SLC2A14 /// SL | 1.5346237 | 9.59E-05   | 0.0058277 | ADAMTS3      | -1.5974668 | 0.000477  | 0.013679665 |
| ARHGAP29       | 1.5338447 | 0.00047975 | 0.0137121 | RAP1GDS1     | -1.5974606 | 0.0003416 | 0.011395702 |
| LINC00958      | 1.5334654 | 0.00103128 | 0.0215541 | CROT         | -1.5970383 | 0.0006186 | 0.016074069 |
| GADD45B        | 1.5327197 | 0.00077662 | 0.018246  | SMC1A        | -1.5956005 | 0.0006607 | 0.016632093 |

|               |           |            |           |              |            |           |             |
|---------------|-----------|------------|-----------|--------------|------------|-----------|-------------|
| CDCP1         | 1.532522  | 0.00169978 | 0.0291965 | AL832909 /// | -1.5948441 | 5.42E-05  | 0.004491723 |
| GTPBP6        | 1.5323277 | 0.00012035 | 0.0065804 | RARS2        | -1.5946505 | 0.000142  | 0.007077297 |
| NEDD4         | 1.532285  | 0.00350305 | 0.0450975 | CAT          | -1.5945745 | 0.0001324 | 0.006825365 |
| MTERF4        | 1.5318189 | 0.0003719  | 0.011905  | MLLT11       | -1.5943341 | 0.0001599 | 0.007555892 |
| FBLIM1        | 1.5314084 | 0.00113878 | 0.0228379 | ZMYM6        | -1.59383   | 0.0007163 | 0.017434169 |
| ASCC3         | 1.5305544 | 0.00132792 | 0.0250617 | MBOAT2       | -1.593457  | 0.0016333 | 0.028474334 |
| JADE1         | 1.5304496 | 0.00016068 | 0.0075559 | ACTR3        | -1.5931767 | 0.0002007 | 0.008560016 |
| LUC7L2        | 1.5301912 | 6.45E-05   | 0.0048384 | KDSR         | -1.5928222 | 0.0023824 | 0.035903297 |
| PLAU          | 1.5301718 | 0.00098281 | 0.0208876 | SYNM         | -1.5922816 | 0.0003995 | 0.012295927 |
| RAB5A         | 1.5297418 | 9.76E-05   | 0.00589   | PDZK1        | -1.5917431 | 0.0008575 | 0.019291743 |
| FBXL12        | 1.5294565 | 0.00023344 | 0.0092756 | SULT1A2      | -1.5905099 | 0.0012169 | 0.023838202 |
| ETV4          | 1.5286548 | 0.00088869 | 0.019616  | HSP90B1      | -1.5895968 | 0.0002239 | 0.009088333 |
| LOC100996732  | 1.5284067 | 0.00035332 | 0.0115746 | RTN3         | -1.5890135 | 4.50E-05  | 0.004027564 |
| MPRIIP        | 1.5280497 | 0.00014557 | 0.0071789 | MCM6         | -1.5869922 | 0.0008576 | 0.019291743 |
| PRR16         | 1.527615  | 0.00251791 | 0.037147  | LRRFIP1      | -1.5867312 | 0.0005184 | 0.014519724 |
| ZNF621        | 1.5274103 | 0.00118807 | 0.0235314 | USP9X        | -1.5864456 | 0.0022142 | 0.03434392  |
| RANGRF        | 1.5273068 | 6.88E-05   | 0.0049613 | CHD2         | -1.5862292 | 0.0001755 | 0.00793088  |
| ZXDB          | 1.5271845 | 0.00021077 | 0.0087834 | HSPA2        | -1.5862271 | 0.0031674 | 0.042410105 |
| ANXA2         | 1.5266135 | 0.00061716 | 0.0160682 | AIG1         | -1.5853123 | 0.0001418 | 0.007077297 |
| ALKBH8        | 1.5264956 | 0.00202909 | 0.0324576 | ANXA6        | -1.5848628 | 8.46E-05  | 0.00549118  |
| LOC101927841  | 1.5262278 | 6.93E-05   | 0.0049769 | FAM230C      | -1.5848603 | 0.0004071 | 0.012438224 |
| ZNF426        | 1.5259817 | 0.00227127 | 0.0349217 | ALDOC        | -1.5847309 | 8.27E-05  | 0.005414826 |
| ISL1          | 1.5257597 | 0.00036969 | 0.011855  | GSN          | -1.5846262 | 0.0005224 | 0.014609519 |
| RGS16         | 1.5257167 | 0.00042936 | 0.0128578 | TCEAL8       | -1.5841329 | 8.21E-05  | 0.005388028 |
| CENPL         | 1.5250997 | 0.00017502 | 0.007928  | TAF9B        | -1.5838707 | 0.00174   | 0.029544891 |
| SAP30BP       | 1.5249636 | 0.00015744 | 0.0074787 | PTPRS        | -1.5832384 | 0.0007498 | 0.017854585 |
| LINC00341 /// | 1.5245541 | 0.00038593 | 0.012107  | LAMA3        | -1.5830137 | 4.92E-05  | 0.004257409 |
| LOC101928717  | 1.5244182 | 0.00013707 | 0.0069648 | MUT          | -1.5824926 | 0.0001494 | 0.007301149 |
| TMEM161B      | 1.5241807 | 0.00062173 | 0.016118  | VAPA         | -1.5818283 | 0.0011654 | 0.023162372 |
| CRY1          | 1.5236502 | 0.00299931 | 0.0411434 | RASA2        | -1.5804077 | 0.0003687 | 0.011842535 |
| EPHB2         | 1.5234527 | 0.00039424 | 0.0122472 | MLLT3        | -1.5797101 | 0.001122  | 0.022678987 |
| IFI16         | 1.5229156 | 0.00013208 | 0.0068254 | GNAI1        | -1.5795049 | 6.83E-05  | 0.004953055 |
| PHF21A        | 1.5220338 | 0.00083778 | 0.0190647 | AP5M1        | -1.5793597 | 0.0035142 | 0.04518763  |
| USP6NL ///    | 1.5219698 | 0.00270529 | 0.0386596 | TOMM34       | -1.5791435 | 0.001933  | 0.0315205   |
| MRPS18B       | 1.5215647 | 0.000195   | 0.0084719 | BDH1         | -1.5790719 | 0.0002294 | 0.009178271 |
| PTPN2         | 1.5215209 | 0.00021978 | 0.0090158 | PRKAB2       | -1.5783069 | 0.0002949 | 0.010476973 |
| LOC101060510  | 1.5213703 | 0.00022289 | 0.0090605 | ENOPH1       | -1.5781731 | 0.0023068 | 0.035286607 |
| RGS2          | 1.5212098 | 0.00146426 | 0.02666   | ZBED5-AS1    | -1.5772723 | 0.0004764 | 0.013672243 |
| ATF4          | 1.521199  | 9.10E-05   | 0.0056489 | PHKB         | -1.5772376 | 0.0001996 | 0.008531215 |
| C9orf156      | 1.52097   | 0.00052177 | 0.0145997 | CPS1-IT1     | -1.576068  | 0.0004716 | 0.013591134 |
| BGLAP ///     | 1.5203544 | 0.00201814 | 0.0323773 | LOC10099650  | -1.5759381 | 0.0003557 | 0.011623981 |
| POC5          | 1.5197666 | 0.00019513 | 0.0084719 | CCDC167      | -1.5757492 | 0.0001264 | 0.00669642  |
| PPP5C         | 1.519456  | 0.00045953 | 0.0133786 | EID1         | -1.5756191 | 7.57E-05  | 0.005193524 |
| WDR13         | 1.5188872 | 0.0002101  | 0.0087621 | PIEZO1       | -1.5748631 | 0.0026643 | 0.038394307 |
| RAD23B        | 1.5181101 | 0.00011507 | 0.0064196 | C1orf174     | -1.5745487 | 0.0006086 | 0.015961256 |
| PCGF1         | 1.5179983 | 8.16E-05   | 0.0053813 | NSDHL        | -1.5743492 | 0.0002275 | 0.00916528  |
| TTC17         | 1.517927  | 0.0013962  | 0.0258567 | CALU         | -1.5731781 | 7.20E-05  | 0.005073395 |
| C15orf39      | 1.5174275 | 7.31E-05   | 0.0050978 | B4GALT5      | -1.5730611 | 5.14E-05  | 0.004381543 |
| ZFPM2         | 1.5173393 | 0.00020857 | 0.0087413 | SNAP23       | -1.5725694 | 8.65E-05  | 0.005567382 |
| NXT1          | 1.5172885 | 0.00028584 | 0.0102683 | GXYLT2       | -1.572262  | 5.93E-05  | 0.004582711 |

|               |           |            |           |              |            |           |             |
|---------------|-----------|------------|-----------|--------------|------------|-----------|-------------|
| KIF1C         | 1.5170525 | 0.00098441 | 0.0209101 | NPY1R        | -1.5716569 | 0.0021673 | 0.033875503 |
| TTC26         | 1.5169194 | 0.00160291 | 0.0281254 | ST3GAL5      | -1.5715998 | 0.0005864 | 0.015641161 |
| DDAH2         | 1.516731  | 0.00045384 | 0.0132729 | DDR1 /// MIR | -1.5709927 | 0.0007418 | 0.017695461 |
| SOCS2         | 1.5165646 | 0.00024906 | 0.0096644 | PTPN4        | -1.570732  | 0.0001692 | 0.007783009 |
| PI3           | 1.5163854 | 0.0003844  | 0.0120787 | CREBZF       | -1.570431  | 0.0010981 | 0.022452595 |
| LOC100506870  | 1.5158899 | 0.00082249 | 0.0189224 | COQ2         | -1.5699014 | 0.0003909 | 0.012184796 |
| ZNRD1         | 1.5154392 | 0.00011425 | 0.0063999 | ADAM22       | -1.5694602 | 0.0010251 | 0.021481971 |
| PRH1-PRR4 /// | 1.5153601 | 0.00135436 | 0.0253817 | ADIPOR2      | -1.5691948 | 4.37E-05  | 0.003988215 |
| SCO2          | 1.5147938 | 0.00025668 | 0.0098071 | LINC00472    | -1.5689035 | 0.0010596 | 0.021897674 |
| ZNF75A        | 1.5142844 | 0.00154264 | 0.0275454 | PSAT1        | -1.5684855 | 0.0001983 | 0.008529724 |
| TMEM87A       | 1.5142368 | 0.00043425 | 0.0129107 | MTHFD2       | -1.5677039 | 0.0009643 | 0.020643036 |
| GPANK1        | 1.511769  | 0.00046996 | 0.0135733 | MUM1         | -1.5674545 | 0.0003099 | 0.010833296 |
| LPHN3         | 1.5113864 | 0.00020809 | 0.0087413 | FAM115A      | -1.5671882 | 0.0024376 | 0.03647399  |
| LOC100506403  | 1.5110381 | 0.00072641 | 0.0175116 | PWAR6        | -1.5669651 | 0.0016041 | 0.028126499 |
| CAMK2D        | 1.5108713 | 0.00154956 | 0.0276147 | HMGCR        | -1.5669135 | 8.70E-05  | 0.005580165 |
| PREPL         | 1.5103845 | 0.00341964 | 0.044474  | SPTLC3       | -1.5666281 | 0.002766  | 0.039238724 |
| ZBTB38        | 1.510067  | 0.00076356 | 0.0180492 | ST6GAL1      | -1.566617  | 8.75E-05  | 0.005587874 |
| IL11          | 1.5097934 | 0.0004247  | 0.0127865 | RPL22        | -1.5662304 | 0.0001451 | 0.007178896 |
| CTTN          | 1.5097408 | 0.00021998 | 0.0090158 | ME2          | -1.5657307 | 0.0010391 | 0.021667083 |
| SLPI          | 1.5092986 | 0.00071854 | 0.0174387 | ZBTB41       | -1.5648962 | 0.0029712 | 0.040929421 |
| CARD6         | 1.509152  | 0.0022603  | 0.0348215 | STAU2        | -1.5644238 | 0.0001292 | 0.006767789 |
| CTSS          | 1.5089783 | 0.00054786 | 0.0149793 | FABP3        | -1.5644167 | 0.0012793 | 0.02450022  |
| AKAP12        | 1.5088999 | 0.0023171  | 0.0353414 | LRP8         | -1.5643302 | 0.0001974 | 0.008510469 |
| AKAP8L        | 1.5088998 | 0.00105974 | 0.0218977 | SKP2         | -1.5631424 | 0.0001111 | 0.006327189 |
| MRPS18A       | 1.508874  | 8.88E-05   | 0.0056019 | LOC1019270   | -1.5619735 | 0.0031087 | 0.041889708 |
| SRGAP1        | 1.5087943 | 0.00255377 | 0.0374196 | EPM2AIP1     | -1.561945  | 0.0010574 | 0.021895983 |
| PHLDB2        | 1.5085138 | 0.00083791 | 0.0190647 | FDX1         | -1.5618353 | 0.0001113 | 0.006327189 |
| NFKBIB        | 1.5078321 | 0.000322   | 0.0110744 | TOM1L1       | -1.5613607 | 0.0001004 | 0.005995306 |
| STMN3         | 1.5076999 | 0.00149514 | 0.0270059 | TRIM5        | -1.5612142 | 0.0001277 | 0.006716938 |
| ETS1          | 1.5074612 | 0.00252931 | 0.0372313 | IDE          | -1.5603462 | 0.0001102 | 0.006302674 |
| ABLIM3        | 1.5068033 | 0.000254   | 0.0097662 | COX16 /// SY | -1.5601439 | 4.56E-05  | 0.004047384 |
| MYH9          | 1.5065904 | 0.00016501 | 0.0076847 | CTH          | -1.5600461 | 0.0023762 | 0.035867056 |
| STAMBP        | 1.5061454 | 0.00030586 | 0.0107337 | SCARB2       | -1.5595396 | 0.0002287 | 0.009173251 |
| FOXA1         | 1.5058084 | 0.00158312 | 0.0279296 | LPIN2        | -1.5593982 | 0.0005969 | 0.015805096 |
| CXCL2         | 1.5057018 | 0.00423443 | 0.0507491 | TRAK2        | -1.5590838 | 0.0007211 | 0.017460363 |
| CCDC127       | 1.505561  | 0.00092377 | 0.0200892 | DUSP9        | -1.5587914 | 0.0011355 | 0.022812343 |
| CREB3         | 1.505402  | 0.00041481 | 0.0125727 | HUWE1        | -1.5587542 | 0.0001808 | 0.008067732 |
| CDK14         | 1.5052712 | 0.00054461 | 0.0149406 | PPP2R1B      | -1.5583959 | 0.000288  | 0.010316833 |
| SNW1          | 1.5052475 | 0.00016956 | 0.007783  | CDH19        | -1.5583723 | 0.000706  | 0.017286279 |
| PXDC1         | 1.5048642 | 0.00014198 | 0.0070773 | MLF1         | -1.557735  | 0.0019854 | 0.032077418 |
| POLR1E        | 1.5044045 | 0.00061694 | 0.0160682 | PDE3B        | -1.5575517 | 6.88E-05  | 0.004961258 |
| JRK           | 1.5042727 | 0.00363294 | 0.0461909 | TMEM30A      | -1.5572828 | 0.0012531 | 0.024235353 |
| RIOK2         | 1.5041192 | 0.00035791 | 0.0116619 | CSTF2T       | -1.5570092 | 0.0002427 | 0.009484415 |
| N4BP2L2       | 1.5039666 | 0.00137929 | 0.0256575 | HTRA1        | -1.5568681 | 0.000222  | 0.009047844 |
| GLRX          | 1.5039611 | 0.0015651  | 0.0277452 | AGMAT        | -1.5565917 | 0.000191  | 0.008409679 |
| AZI2          | 1.5039038 | 0.00231908 | 0.0353414 | SNAPC3       | -1.5561499 | 0.0019171 | 0.031319877 |
| PDLIM7        | 1.5039016 | 0.00126858 | 0.0243777 | DESI2        | -1.5547509 | 0.0004911 | 0.013947767 |
| ZNF473        | 1.5034125 | 0.000427   | 0.0128264 | TCF19        | -1.5545824 | 0.0002091 | 0.008741303 |
| CCDC86        | 1.5032282 | 0.00125528 | 0.0242517 | SELENBP1     | -1.5544327 | 0.0017407 | 0.029547468 |
| MRPS18C       | 1.503181  | 0.00011681 | 0.006469  | UHRF1BP1     | -1.5533777 | 0.0003185 | 0.010993751 |



|               |           |            |           |             |            |           |             |
|---------------|-----------|------------|-----------|-------------|------------|-----------|-------------|
| SPRY4         | 1.5031071 | 0.00053221 | 0.0147784 | APC         | -1.5532075 | 0.0003935 | 0.01223058  |
| PTPRK         | 1.502732  | 0.00010529 | 0.00619   | SEMA4F      | -1.5526249 | 0.0014801 | 0.026823429 |
| ORC4          | 1.5026865 | 0.00017161 | 0.0078362 | COX4I1      | -1.5522006 | 0.0002147 | 0.008898723 |
| MTO1          | 1.5022788 | 9.51E-05   | 0.0058128 | PASK        | -1.5519429 | 7.85E-05  | 0.005273797 |
| LSM12         | 1.5021364 | 0.00144313 | 0.0264598 | SLC38A6     | -1.5518352 | 0.0009276 | 0.020126439 |
| RBMS3         | 1.5020217 | 0.00020969 | 0.0087585 | STK17B      | -1.5511605 | 0.0002772 | 0.010140519 |
| SPANXA1 /// S | 1.5016748 | 0.00052993 | 0.0147226 | UBAP2L      | -1.5507101 | 0.0008518 | 0.019236608 |
| COX10-AS1     | 1.501592  | 0.0017155  | 0.0293018 | NAAA        | -1.5505252 | 0.0003858 | 0.012106977 |
| RARA          | 1.5015861 | 0.00012213 | 0.0066084 | TRAPPC3L    | -1.5504288 | 0.0025212 | 0.037170101 |
| TMC5          | 1.5015554 | 0.00136008 | 0.0254279 | RALBP1      | -1.5496421 | 0.002369  | 0.03579966  |
| IQCG          | 1.50124   | 0.00091482 | 0.0199591 | ZNF224      | -1.5488794 | 0.000605  | 0.015917926 |
| NSRP1         | 1.5008775 | 0.00071914 | 0.0174441 | SULT1A1     | -1.5487038 | 0.0007339 | 0.017599871 |
| PIBF1         | 1.5004135 | 0.0024805  | 0.0368242 | AKAP7       | -1.5484018 | 9.60E-05  | 0.005827684 |
| KCNC4         | 1.5001818 | 0.00022876 | 0.0091733 | SRPX        | -1.5483296 | 0.0001308 | 0.006824753 |
| ZRANB2        | 1.4995624 | 0.00101267 | 0.0213198 | VAMP3       | -1.5479764 | 0.0004152 | 0.012578015 |
| BANP          | 1.4992205 | 0.00031976 | 0.0110301 | ZNF326      | -1.5478129 | 0.0025316 | 0.037248749 |
|               |           |            |           | C2orf194    | -1.5475197 | 0.0005637 | 0.015257322 |
|               |           |            |           | SFXN2       | -1.5462663 | 0.0002224 | 0.009053373 |
|               |           |            |           | SMYD2       | -1.5457451 | 0.0014616 | 0.026655721 |
|               |           |            |           | ASRGL1      | -1.5457309 | 0.0008395 | 0.019076344 |
|               |           |            |           | AP001347.6  | -1.5456132 | 0.0025542 | 0.037419645 |
|               |           |            |           | NASP        | -1.5455129 | 0.0001767 | 0.007968972 |
|               |           |            |           | ATR         | -1.5452537 | 0.0001944 | 0.008471931 |
|               |           |            |           | ACBD5       | -1.5450453 | 0.0003873 | 0.012122002 |
|               |           |            |           | EPB41L1     | -1.5448435 | 0.0001962 | 0.008486798 |
|               |           |            |           | MAP4        | -1.5445722 | 0.0032748 | 0.043307718 |
|               |           |            |           | CRYL1       | -1.544268  | 0.0007165 | 0.017434169 |
|               |           |            |           | STAU1       | -1.5441594 | 0.0012764 | 0.024478514 |
|               |           |            |           | CEP162      | -1.5439485 | 0.0002546 | 0.009772891 |
|               |           |            |           | SH3BGRL     | -1.5435501 | 0.0006568 | 0.016606486 |
|               |           |            |           | RAB12       | -1.5434373 | 0.0002784 | 0.010140697 |
|               |           |            |           | SCAF11      | -1.5430832 | 0.0027237 | 0.038865148 |
|               |           |            |           | FAM8A1      | -1.5430703 | 0.0001512 | 0.007341271 |
|               |           |            |           | NCOA2       | -1.5428101 | 0.0007325 | 0.017592099 |
|               |           |            |           | PPP1CB      | -1.5424937 | 0.0001448 | 0.007168893 |
|               |           |            |           | N4BP2       | -1.5420711 | 0.0029902 | 0.041077704 |
|               |           |            |           | SFXN1       | -1.5417412 | 7.74E-05  | 0.005250669 |
|               |           |            |           | NES         | -1.5409505 | 0.0009913 | 0.021007236 |
|               |           |            |           | B4GALT1     | -1.5408265 | 0.0013559 | 0.02539675  |
|               |           |            |           | PRSS23      | -1.5407642 | 0.0002319 | 0.009240254 |
|               |           |            |           | DEPDC1      | -1.5399323 | 0.0002981 | 0.010543002 |
|               |           |            |           | HERC4       | -1.5395728 | 0.0007326 | 0.017592099 |
|               |           |            |           | MIR4458 /// | -1.5394213 | 0.0011908 | 0.023531362 |
|               |           |            |           | PPM1F       | -1.5391553 | 0.0028245 | 0.03970534  |
|               |           |            |           | BRMS1L      | -1.5391247 | 0.0001943 | 0.008471931 |
|               |           |            |           | FAM114A2    | -1.5387175 | 0.0001466 | 0.0072024   |
|               |           |            |           | CRELD2      | -1.5384819 | 0.0002474 | 0.009612861 |
|               |           |            |           | JAK1        | -1.5371714 | 0.0001149 | 0.006416215 |
|               |           |            |           | AKR7A2      | -1.5370495 | 7.04E-05  | 0.005010977 |
|               |           |            |           | RPL31       | -1.5370003 | 0.0012924 | 0.024629848 |

|  |  |  |  |               |            |           |             |
|--|--|--|--|---------------|------------|-----------|-------------|
|  |  |  |  | PSMB2         | -1.5369031 | 0.0011072 | 0.022555047 |
|  |  |  |  | LINC00294     | -1.5363026 | 0.0003394 | 0.011384894 |
|  |  |  |  | PHF20L1       | -1.5352567 | 0.0002155 | 0.008915418 |
|  |  |  |  | MBD6          | -1.534433  | 0.0001038 | 0.006115113 |
|  |  |  |  | CD36          | -1.5338796 | 0.0004467 | 0.013151767 |
|  |  |  |  | CBX6          | -1.5338764 | 0.0001567 | 0.007457369 |
|  |  |  |  | GMPS          | -1.5338683 | 0.000587  | 0.015647871 |
|  |  |  |  | CRTC3         | -1.5338137 | 0.0040722 | 0.049609735 |
|  |  |  |  | RPL13 /// SN  | -1.5332778 | 0.000823  | 0.018922407 |
|  |  |  |  | BCKDHB        | -1.5330192 | 0.0001163 | 0.006456077 |
|  |  |  |  | CABLES2       | -1.5327381 | 8.57E-05  | 0.005529468 |
|  |  |  |  | RBM8A         | -1.5326477 | 0.0001073 | 0.006215054 |
|  |  |  |  | REEP1         | -1.532372  | 0.002647  | 0.03827736  |
|  |  |  |  | NUCB2         | -1.531273  | 0.0002556 | 0.009795092 |
|  |  |  |  | ABCB6         | -1.5309762 | 0.0016072 | 0.02816455  |
|  |  |  |  | FASTKD2       | -1.5306979 | 0.0001698 | 0.007783009 |
|  |  |  |  | MAPK9         | -1.5299831 | 0.0002894 | 0.010347964 |
|  |  |  |  | ATG2A         | -1.5289704 | 0.0003517 | 0.011562135 |
|  |  |  |  | NCOA3         | -1.5288646 | 0.0004379 | 0.012988674 |
|  |  |  |  | SLC25A36      | -1.5279721 | 0.0005559 | 0.015120588 |
|  |  |  |  | MINPP1        | -1.5278228 | 0.0001139 | 0.00639562  |
|  |  |  |  | TCP11L1       | -1.5276878 | 0.0003225 | 0.011074411 |
|  |  |  |  | SCAI          | -1.527467  | 0.0024742 | 0.036800452 |
|  |  |  |  | GLYR1 /// SEP | -1.5269826 | 0.0006886 | 0.016981309 |
|  |  |  |  | MREG          | -1.5263889 | 0.0001424 | 0.007077318 |
|  |  |  |  | PALLD         | -1.5263625 | 0.001339  | 0.025193569 |
|  |  |  |  | CCDC25        | -1.5262591 | 0.0005474 | 0.014978788 |
|  |  |  |  | TRIM45        | -1.525914  | 0.0002777 | 0.010140697 |
|  |  |  |  | SMCO4         | -1.5257969 | 0.0002783 | 0.010140697 |
|  |  |  |  | WDSUB1        | -1.5251202 | 0.0012249 | 0.023910456 |
|  |  |  |  | ADA           | -1.5248754 | 0.0002388 | 0.009360302 |
|  |  |  |  | TMEM9         | -1.5247549 | 0.0004294 | 0.012857831 |
|  |  |  |  | MMAB          | -1.5245256 | 0.0014188 | 0.026135537 |
|  |  |  |  | JAKMIP2       | -1.5240747 | 0.0020814 | 0.033055396 |
|  |  |  |  | DBI           | -1.5237037 | 0.0002631 | 0.0099219   |
|  |  |  |  | ATP13A3       | -1.5235906 | 0.0039082 | 0.048420185 |
|  |  |  |  | LMBRD2        | -1.5222666 | 0.0011338 | 0.022812343 |
|  |  |  |  | SGTB          | -1.5221255 | 0.0002801 | 0.010174314 |
|  |  |  |  | RSRC1         | -1.5218556 | 0.0004504 | 0.01321027  |
|  |  |  |  | KDM4B         | -1.521375  | 0.0011006 | 0.022473939 |
|  |  |  |  | PKD2          | -1.5212289 | 0.0023589 | 0.035696125 |
|  |  |  |  | GALNS         | -1.5209022 | 0.0001078 | 0.006231104 |
|  |  |  |  | TTL           | -1.5207491 | 0.0003109 | 0.010849207 |
|  |  |  |  | TTC39C        | -1.5204409 | 0.000439  | 0.012988674 |
|  |  |  |  | ZNF204P       | -1.5203836 | 0.0026273 | 0.038102912 |
|  |  |  |  | STX17         | -1.5198695 | 0.0001666 | 0.007726875 |
|  |  |  |  | CRIPAK        | -1.519476  | 0.0003718 | 0.01190503  |
|  |  |  |  | RAB5B         | -1.5192794 | 0.0001993 | 0.008531215 |
|  |  |  |  | SGK1          | -1.5192083 | 0.0041739 | 0.050288824 |
|  |  |  |  | IQGAP3        | -1.5189202 | 0.0001891 | 0.008356203 |

|  |  |  |  |              |            |           |             |
|--|--|--|--|--------------|------------|-----------|-------------|
|  |  |  |  | TMEM106C     | -1.5181927 | 0.0006618 | 0.016632093 |
|  |  |  |  | ZNF782       | -1.5181051 | 0.0029356 | 0.040660415 |
|  |  |  |  | SERINC5      | -1.5180399 | 0.001701  | 0.029200545 |
|  |  |  |  | MF12         | -1.5179866 | 0.0009796 | 0.020858441 |
|  |  |  |  | BMPR2        | -1.5179842 | 0.0001419 | 0.007077297 |
|  |  |  |  | NUDT3        | -1.5179633 | 0.0003204 | 0.011030185 |
|  |  |  |  | HNRNPC       | -1.5179326 | 0.0002949 | 0.010476973 |
|  |  |  |  | NFIA         | -1.5178136 | 0.0001004 | 0.005995306 |
|  |  |  |  | CREG1        | -1.5173939 | 0.0005298 | 0.014722552 |
|  |  |  |  | EXOC5        | -1.517389  | 0.0005363 | 0.014847033 |
|  |  |  |  | EFR3A        | -1.5172043 | 0.0005508 | 0.015034886 |
|  |  |  |  | LOC10272451  | -1.5170899 | 0.0017715 | 0.029802028 |
|  |  |  |  | POPDC3       | -1.5169008 | 0.0006235 | 0.016140521 |
|  |  |  |  | HECA         | -1.5168499 | 0.000417  | 0.012615019 |
|  |  |  |  | NNT          | -1.5164428 | 0.0024979 | 0.036976584 |
|  |  |  |  | TM7SF3       | -1.5159565 | 0.0026662 | 0.03841088  |
|  |  |  |  | USP48        | -1.5153734 | 0.0001241 | 0.006659107 |
|  |  |  |  | ITM2B        | -1.5152523 | 0.0001398 | 0.007044168 |
|  |  |  |  | CDYL2        | -1.5151605 | 0.0001547 | 0.007438976 |
|  |  |  |  | SDHC         | -1.5151568 | 0.0016125 | 0.028227744 |
|  |  |  |  | SLC25A3      | -1.5151404 | 0.0011531 | 0.022980594 |
|  |  |  |  | NR2F1 /// NR | -1.514909  | 0.0002715 | 0.010084886 |
|  |  |  |  | ELOVL5       | -1.5147838 | 7.23E-05  | 0.005084147 |
|  |  |  |  | AMFR         | -1.5147132 | 0.0001159 | 0.00645377  |
|  |  |  |  | ERMP1        | -1.5146295 | 0.0010054 | 0.02123229  |
|  |  |  |  | HOGA1        | -1.5145103 | 0.0005818 | 0.015565822 |
|  |  |  |  | SUB1         | -1.5144351 | 9.49E-05  | 0.00581278  |
|  |  |  |  | WDR44        | -1.5141999 | 0.0002616 | 0.009900719 |
|  |  |  |  | TSPYL1       | -1.5133882 | 0.0003735 | 0.011918191 |
|  |  |  |  | MARK1        | -1.513345  | 0.001873  | 0.030901273 |
|  |  |  |  | CMBL         | -1.5129819 | 0.0002881 | 0.010316833 |
|  |  |  |  | LOC10013231  | -1.5129657 | 0.0002037 | 0.008619104 |
|  |  |  |  | MB           | -1.5120912 | 0.0038924 | 0.048336836 |
|  |  |  |  | IL17RB       | -1.5116291 | 0.0001991 | 0.008531215 |
|  |  |  |  | SLC16A10     | -1.5110276 | 0.0007178 | 0.017438701 |
|  |  |  |  | ARHGEF40     | -1.5108312 | 0.0006142 | 0.016032582 |
|  |  |  |  | SAP30L       | -1.5105942 | 0.0019196 | 0.031329754 |
|  |  |  |  | CLN5         | -1.5103629 | 0.0006501 | 0.016534452 |
|  |  |  |  | BICC1        | -1.5102377 | 0.0001616 | 0.007576507 |
|  |  |  |  | TFF1         | -1.5102349 | 0.0011264 | 0.022742416 |
|  |  |  |  | HIST3H2A     | -1.509692  | 0.0005397 | 0.014874168 |
|  |  |  |  | ROBO1        | -1.5096259 | 0.00013   | 0.006795332 |
|  |  |  |  | ENTPD5       | -1.5090865 | 0.0002602 | 0.009886341 |
|  |  |  |  | WDR92        | -1.5090742 | 7.39E-05  | 0.005126027 |
|  |  |  |  | C1orf216     | -1.5090733 | 0.0001417 | 0.007077297 |
|  |  |  |  | PIGS         | -1.5089857 | 9.60E-05  | 0.005827684 |
|  |  |  |  | RELL1        | -1.5084408 | 0.0006257 | 0.016181948 |
|  |  |  |  | EIF4E3       | -1.5082063 | 0.0030456 | 0.041397836 |
|  |  |  |  | NUP210       | -1.5072682 | 9.44E-05  | 0.005806079 |
|  |  |  |  | B3GNT2       | -1.5072149 | 0.0025149 | 0.037132823 |

|  |  |  |  |              |            |           |             |
|--|--|--|--|--------------|------------|-----------|-------------|
|  |  |  |  | DHTKD1       | -1.5069011 | 0.0003013 | 0.010612377 |
|  |  |  |  | RCN2         | -1.5067941 | 0.0013082 | 0.024826458 |
|  |  |  |  | MRPS14       | -1.5067777 | 0.0001552 | 0.007438976 |
|  |  |  |  | CHCHD7       | -1.5062596 | 0.0017614 | 0.029756589 |
|  |  |  |  | IPW /// LOC1 | -1.5059389 | 0.0006811 | 0.016880195 |
|  |  |  |  | KANSL1-AS1   | -1.5059223 | 0.003287  | 0.04340951  |
|  |  |  |  | FRG1 /// FRG | -1.5057276 | 0.0028039 | 0.039602781 |
|  |  |  |  | KBTBD4 /// P | -1.5054117 | 0.0002326 | 0.009254114 |
|  |  |  |  | FREM2        | -1.5048821 | 0.0015598 | 0.027688158 |
|  |  |  |  | LPCAT3       | -1.5045179 | 0.0004604 | 0.013397135 |
|  |  |  |  | DEPDC1B      | -1.5042598 | 0.0009507 | 0.020489301 |
|  |  |  |  | RAP2A        | -1.5042294 | 0.0001063 | 0.006215054 |
|  |  |  |  | TOP2A        | -1.504186  | 0.0003873 | 0.012122002 |
|  |  |  |  | SAE1         | -1.5041508 | 0.0001366 | 0.0069636   |
|  |  |  |  | KLHL8        | -1.5040845 | 0.0001478 | 0.007234909 |
|  |  |  |  | PARP9        | -1.50369   | 0.0031127 | 0.041927997 |
|  |  |  |  | MRPL4        | -1.5035121 | 0.0001669 | 0.007732104 |
|  |  |  |  | A2M-AS1      | -1.5034336 | 0.0018702 | 0.030883314 |
|  |  |  |  | EIF2AK1      | -1.5022478 | 0.0017658 | 0.029766324 |
|  |  |  |  | Mar-06       | -1.5021593 | 0.0007579 | 0.017938906 |
|  |  |  |  | HIST1H2AM    | -1.5010597 | 0.0003358 | 0.011318831 |
|  |  |  |  | NDFIP1       | -1.5007436 | 0.0002091 | 0.008741303 |
|  |  |  |  | GAB1         | -1.5006662 | 0.0036894 | 0.046640446 |
|  |  |  |  | SNX13        | -1.5003242 | 0.0003745 | 0.011918191 |
|  |  |  |  | RRAGA        | -1.4999904 | 0.0001552 | 0.007438976 |
|  |  |  |  | RWDD3        | -1.4998406 | 0.0006273 | 0.016209646 |
|  |  |  |  | ZDHHC23      | -1.4996999 | 0.0006152 | 0.016041275 |

Supplementary Table 2.2:

Enriched pathways and GO BP terms for down regulated genes

| Enriched Pathway/GOBP                                                              | NOM p-val  | FDR q-val   | Genes (Down Regulated)                                                                                                                           |
|------------------------------------------------------------------------------------|------------|-------------|--------------------------------------------------------------------------------------------------------------------------------------------------|
| RESPONSE TO DRUG (GO:0042493)                                                      | 0.001      | 0.01819389  | SPINK4,VAV3,HMGCS1,FECH,WFDC1,ASS1,CCNB1,ACTC1,ADSSL1,PDE3A,HADH,MAP2K6,SNCA                                                                     |
| STEROL BIOSYNTHETIC PROCESS (GO:0016126)                                           | 0.001      | 0.03725657  | SQLE,IDI1,G6PD,HMGCS1,INSIG1,SC5D,MSMO1,DHCR24,DHCR7,HSD17B7,FDFT1                                                                               |
| ALCOHOL BIOSYNTHETIC PROCESS (GO:0046165)                                          | 0.001      | 0.061849456 | CDS1,IDI1,G6PD,HMGCS1,INSIG1,MSMO1,DHCR24,SGMS2,HSD17B7,SQLE,SPTLC2,SC5D,DHCR7,FDFT1                                                             |
| CHOLESTEROL METABOLIC PROCESS (GO:0008203)                                         | 0.001      | 0.06952534  | SQLE,IDI1,G6PD,HMGCS1,FECH,INSIG1,SC5D,MSMO1,DHCR24,DHCR7,HSD17B7,FDFT1                                                                          |
| CHOLESTEROL BIOSYNTHESIS_HOMO SAPIENS_R-HSA-191273                                 | 0.001      | 0.07502247  | SQLE,IDI1,HMGCS1,SC5D,MSMO1,DHCR24,DHCR7,HSD17B7,FDFT1                                                                                           |
| REGULATION OF NEURON DEATH (GO:1901214)                                            | 0.001      | 0.08331036  | NQO1,CASP7,G6PD,EPHA7,BAG1,CTNNB1,DHCR24,CLU,FGFR3,SNCA                                                                                          |
| STEROID METABOLIC PROCESS (GO:0008202)                                             | 0.00113572 | 0.07811574  | IDI1,G6PD,HMGCS1,FECH,INSIG1,SRD5A3,MSMO1,DHCR24,HSD17B7,SQLE,AKR1B10,SC5D,DHCR7,FDFT1                                                           |
| STEROL METABOLIC PROCESS (GO:0016125)                                              | 0.00119403 | 0.08130006  | SQLE,IDI1,G6PD,HMGCS1,FECH,INSIG1,SC5D,MSMO1,DHCR24,DHCR7,HSD17B7,FDFT1                                                                          |
| RESPONSE TO TOPOLOGICALLY INCORRECT PROTEIN (GO:0035966)                           | 0.0013089  | 0.08125589  | ATXN3,ASNS,HSPB3,KDEL3,CLU                                                                                                                       |
| BIOSYNTHESIS OF AMINO ACIDS_HOMO SAPIENS_HSA01230                                  | 0.00135227 | 0.117092654 | PRPS2,IDH1,IDH2,PHGDH,GLUL,ASS1                                                                                                                  |
| RESPONSE TO TRANSITION METAL NANOPARTICLE (GO:1990267)                             | 0.00137268 | 0.15510537  | CCNB1,FECH,CYBRD1,ASS1,SNCA                                                                                                                      |
| POSITIVE REGULATION OF NEURON DEATH (GO:1901216)                                   | 0.00137931 | 0.08067055  | NQO1,CASP7,BAG1,CLU,FGFR3                                                                                                                        |
| ISOPRENOID BIOSYNTHETIC PROCESS (GO:0008299)                                       | 0.00142857 | 0.17281742  | ALDH1A3,IDI1,HMGCS1,FDFT1                                                                                                                        |
| CELLULAR RESPONSE TO INORGANIC SUBSTANCE (GO:0071241)                              | 0.00144928 | 0.21482651  | CCNB1,ASPH,ID2,RYR3,SNCA                                                                                                                         |
| REGULATION OF CHOLESTEROL BIOSYNTHESIS BY SREBP (SREBF)_HOMO SAPIENS_R-HSA-1655829 | 0.00253807 | 0.08318011  | SQLE,IDI1,HMGCS1,INSIG1,SC5D,ELOVL6,DHCR7,SEC24D,FDFT1                                                                                           |
| CHOLESTEROL BIOSYNTHESIS II (VIA 24 25-DIHYDROLANOSTEROL)_HOMO SAPIENS_PWY66-3     | 0.00273038 | 0.153645    | SQLE,SC5D,MSMO1,DHCR24,DHCR7,HSD17B7,FDFT1                                                                                                       |
| ORGANIC HYDROXY COMPOUND BIOSYNTHETIC PROCESS (GO:1901617)                         | 0.00280899 | 0.1549759   | CDS1,IDI1,G6PD,HMGCS1,INSIG1,MSMO1,DHCR24,HSD17B7,SQLE,SPTLC2,SC5D,DHCR7,FDFT1,SNCA                                                              |
| POSITIVE REGULATION OF NEURON APOPTOTIC PROCESS (GO:0043525)                       | 0.00291758 | 0.2194076   | NQO1,CASP7,EPHA7,BAG1,FGFR3                                                                                                                      |
| SUPERPATHWAY OF CHOLESTEROL BIOSYNTHESIS_HOMO SAPIENS_PWY66-5                      | 0.00315457 | 0.06735528  | SQLE,IDI1,HMGCS1,SC5D,MSMO1,DHCR24,DHCR7,HSD17B7,FDFT1                                                                                           |
| SMALL MOLECULE BIOSYNTHETIC PROCESS (GO:0044283)                                   | 0.00319149 | 0.17480774  | CDS1,IDI1,G6PD,HMGCS1,INSIG1,UROS,ASNS,MSMO1,DHCR24,ELOVL6,PLOD1,SGMS2,HSD17B7,ASS1,SQLE,ALDH1A3,FA2H,SPTLC2,SC5D,PHGDH,PTPLAD2,DHCR7,GLUL,FDFT1 |
| MYELOID CELL DIFFERENTIATION (GO:0030099)                                          | 0.00320924 | 0.15093131  | DAB2,FECH,PARP1,ID2,PIR,CTNNB1,SNX10,DNASE2                                                                                                      |
| CHOLESTEROL BIOSYNTHESIS_HOMO SAPIENS_WP197                                        | 0.00326584 | 0.16296035  | SQLE,IDI1,HMGCS1,SC5D,MSMO1,DHCR7,FDFT1                                                                                                          |
| GLUTAMINE FAMILY AMINO ACID METABOLIC PROCESS (GO:0009064)                         | 0.00328947 | 0.17866288  | ALDH5A1,ADSSL1,ASNS,PHGDH,GLUL,ASS1                                                                                                              |
| CELLULAR RESPONSE TO METAL ION (GO:0071248)                                        | 0.00355114 | 0.22263457  | CCNB1,ASPH,ID2,RYR3,SNCA                                                                                                                         |
| RESPONSE TO METAL ION (GO:0010038)                                                 | 0.00422961 | 0.1684212   | CCNB1,FECH,ASPH,ID2,CYBRD1,CTNNB1,RYR3,ASS1,SNCA                                                                                                 |
| CHOLESTEROL BIOSYNTHESIS I_HOMO SAPIENS_PWY66-341                                  | 0.00464191 | 0.16876855  | SQLE,SC5D,MSMO1,DHCR24,DHCR7,HSD17B7,FDFT1                                                                                                       |
| CHOLESTEROL BIOSYNTHESIS III (VIA DESMOSTEROL)_HOMO SAPIENS_PWY66-4                | 0.00472973 | 0.14859524  | SQLE,SC5D,MSMO1,DHCR24,DHCR7,HSD17B7,FDFT1                                                                                                       |
| NEGATIVE REGULATION OF PROTEIN COMPLEX ASSEMBLY (GO:0031333)                       | 0.00550585 | 0.2092183   | SCIN,INSIG1,RDX,CLU,SNCA                                                                                                                         |
| STEROID BIOSYNTHESIS_HOMO SAPIENS_HSA00100                                         | 0.00649351 | 0.205981    | SQLE,SC5D,MSMO1,DHCR24,DHCR7,HSD17B7,FDFT1                                                                                                       |
| REGULATION OF NEURON APOPTOTIC PROCESS (GO:0043523)                                | 0.00779727 | 0.20230176  | NQO1,CASP7,G6PD,EPHA7,BAG1,FGFR3,SNCA                                                                                                            |
| DICARBOXYLIC ACID METABOLIC PROCESS (GO:0043648)                                   | 0.00829082 | 0.23782068  | ALDH5A1,IDH1,IDH2,ADSSL1,ALDH1L2,GLUL,ASS1                                                                                                       |
| STEROID BIOSYNTHETIC PROCESS (GO:0006694)                                          | 5.93E-04   | 0.014826146 | SQLE,IDI1,G6PD,HMGCS1,INSIG1,SRD5A3,SC5D,MSMO1,DHCR24,DHCR7,HSD17B7,FDFT1                                                                        |
| CHOLESTEROL BIOSYNTHETIC PROCESS (GO:0006695)                                      | 6.20E-04   | 0.018628284 | SQLE,IDI1,G6PD,HMGCS1,INSIG1,SC5D,MSMO1,DHCR24,DHCR7,HSD17B7,FDFT1                                                                               |
| ISOPRENOID METABOLIC PROCESS (GO:0006720)                                          | 6.44E-04   | 0.0966241   | ALDH1A3,IDI1,AKR1B10,HMGCS1,SRD5A3,PDE3A,FDFT1                                                                                                   |
| GLUTAMINE METABOLIC PROCESS (GO:0006541)                                           | 7.02E-04   | 0.0934765   | ALDH5A1,ADSSL1,ASNS,PHGDH,GLUL                                                                                                                   |
| ALANINE ASPARTATE AND GLUTAMATE METABOLISM_HOMO SAPIENS_HSA00250                   | 7.46E-04   | 0.16602619  | ALDH5A1,ADSSL1,ASNS,GLUL,ASS1                                                                                                                    |

Supplementary Table 2.3:

Enriched pathways and GO BP terms for Up regulated genes

| Enriched Pathway/GOBP                                                  | NOM p-val  | FDR q-val   | Genes (Up Regulated)                                                                                                                 |
|------------------------------------------------------------------------|------------|-------------|--------------------------------------------------------------------------------------------------------------------------------------|
| NEGATIVE REGULATION OF PHOSPHORUS METABOLIC PROCESS (GO:0010563)       | 0          | 0.002367434 | DUSP4,ERRFI1,PTPRR,EDN1,PID1,SPINK1,GADD45A,TNFAIP3,IRS2,ADARB1,DKK1,DUSP6,SPOCD1,SPRED2,SH3RF2,IL6,UBASH3B,SPRY2,SH3BP4,BIRC3,DACT1 |
| NEGATIVE REGULATION OF PHOSPHATE METABOLIC PROCESS (GO:0045936)        | 0          | 0.003546336 | DUSP4,ERRFI1,PTPRR,EDN1,PID1,SPINK1,GADD45A,TNFAIP3,IRS2,ADARB1,DKK1,DUSP6,SPOCD1,SPRED2,SH3RF2,IL6,UBASH3B,SPRY2,SH3BP4,BIRC3,DACT1 |
| NEGATIVE REGULATION OF PROTEIN PHOSPHORYLATION (GO:0001933)            | 0          | 0.005562093 | DUSP4,ERRFI1,PID1,SPINK1,GADD45A,TNFAIP3,ADARB1,DKK1,DUSP6,SPRED2,IL6,UBASH3B,SPRY2                                                  |
| INFLAMMATORY RESPONSE (GO:0006954)                                     | 0          | 0.005735289 | CXCL8,TNFAIP6,SPHK1,TNFAIP3,LIAS,THBS1,HDAC9,IL6,CXCL11,BCL6,IRAK2,CCL5,SAI1,PTX3,SCG2,MGLL                                          |
| NEGATIVE REGULATION OF PROTEIN KINASE ACTIVITY (GO:0006469)            | 0          | 0.006173807 | DUSP4,SPRED2,ERRFI1,IL6,UBASH3B,GADD45A,SPRY2,TNFAIP3,ADARB1,DUSP6                                                                   |
| NEGATIVE REGULATION OF PROTEIN MODIFICATION PROCESS (GO:0031400)       | 0          | 0.006272291 | DUSP4,ERRFI1,PID1,SPINK1,GADD45A,TNFAIP3,ISG15,ADARB1,DKK1,DUSP6,SPRED2,IL6,UBASH3B,SPRY2                                            |
| NEGATIVE REGULATION OF PHOSPHORYLATION (GO:0042326)                    | 0          | 0.006519801 | DUSP4,ERRFI1,PTPRR,PID1,SPINK1,GADD45A,TNFAIP3,IRS2,ADARB1,DKK1,DUSP6,SPRED2,IL6,UBASH3B,SPRY2,BIRC3,DACT1                           |
| NEGATIVE REGULATION OF KINASE ACTIVITY (GO:0033673)                    | 5.94E-04   | 0.007425739 | DUSP4,SPRED2,ERRFI1,IL6,UBASH3B,GADD45A,SPRY2,TNFAIP3,IRS2,ADARB1,DUSP6                                                              |
| REGULATION OF STRIATED MUSCLE CELL DIFFERENTIATION (GO:0051153)        | 0          | 0.019208333 | EFNB2,EDN1,BMP2,DDIT3,BHLHE41,BCL2,SOX9,DKK1,HDAC9                                                                                   |
| NEGATIVE REGULATION OF TRANSFERASE ACTIVITY (GO:0051348)               | 0          | 0.019321296 | DUSP4,SPRED2,ERRFI1,IL6,UBASH3B,GADD45A,SPRY2,TNFAIP3,IRS2,ADARB1,DUSP6                                                              |
| POSITIVE REGULATION OF LEUKOCYTE CHEMOTAXIS (GO:0002690)               | 0          | 0.019422619 | IL6,EDN1,CXCL8,CCL5,VEGFC,THBS1                                                                                                      |
| CELL CHEMOTAXIS (GO:0060326)                                           | 0          | 0.026154587 | IL6,CXCL11,DOCK4,EDN1,CXCL8,CCL5,SCG2,EPHA2                                                                                          |
| SENSORY PERCEPTION OF SOUND (GO:0007605)                               | 0          | 0.02692999  | THRB,GJB3,TIMM9,LRIG1,SPRY2,SNAI2                                                                                                    |
| SENSORY PERCEPTION OF MECHANICAL STIMULUS (GO:0050954)                 | 7.19E-04   | 0.02738574  | THRB,GJB3,TIMM9,LRIG1,SPRY2,SNAI2                                                                                                    |
| RESPONSE TO OTHER ORGANISM (GO:0051707)                                | 5.44E-04   | 0.02757615  | DDX58,IFI44,ISG15,BCL10,ADARB1,DCLK1,OASL,FOSL1,ISG20,IFIH1,IL6,CCL5,PTX3,IER3                                                       |
| REGULATION OF LEUKOCYTE CHEMOTAXIS (GO:0002688)                        | 0.00196464 | 0.027696999 | IL6,EDN1,CXCL8,CCL5,VEGFC,THBS1                                                                                                      |
| POSITIVE REGULATION OF LEUKOCYTE MIGRATION (GO:0002687)                | 0          | 0.027698588 | IL6,EDN1,CXCL8,CCL5,VEGFC,THBS1                                                                                                      |
| SIGNALING BY FGFR3_HOMO SAPIENS_R-HSA-5654741                          | 0          | 0.027749043 | DUSP4,SPRED2,IRS1,AGO2,SPRY2,IRS2,DUSP6,IER3                                                                                         |
| TAXIS (GO:0042330)                                                     | 0.00116482 | 0.027916707 | FOSL1,IL6,CXCL11,DOCK4,EDN1,CXCL8,CCL5,VEGFC,SCG2,EPHA2                                                                              |
| RESPONSE TO MECHANICAL STIMULUS (GO:0009612)                           | 0          | 0.028261505 | FOSL1,IL6,GADD45A,TNC,TXNIP,ETV1,SOX9,BCL10,THBS1                                                                                    |
| CHEMOTAXIS (GO:0006935)                                                | 0.00114745 | 0.02828646  | FOSL1,IL6,CXCL11,DOCK4,EDN1,CXCL8,CCL5,VEGFC,SCG2,EPHA2                                                                              |
| POSITIVE REGULATION OF CHEMOTAXIS (GO:0050921)                         | 0          | 0.028466364 | IL6,EDN1,CXCL8,CCL5,VEGFC,SCG2,THBS1,F3                                                                                              |
| POSITIVE REGULATION OF LOCOMOTION (GO:0040017)                         | 0.0010929  | 0.028520552 | EDN1,TGFB2,CXCL8,IRS1,ANXA3,SPHK1,PRKCE,VEGFC,IRS2,PTGS2,THBS1,F3,HDAC9,EGFR,CYR61,IL6,BMP2,CCL5,BCL2,SNAI2,CDH13,SOX9,SCG2          |
| NEGATIVE REGULATION OF MAPK CASCADE (GO:0043409)                       | 0.00123839 | 0.02854295  | DUSP4,SPRED2,PTPRR,SPRY2,DUSP6,DACT1                                                                                                 |
| REGULATION OF ESTABLISHMENT OF PROTEIN LOCALIZATION (GO:0070201)       | 5.73E-04   | 0.02866387  | CD274,SNAP25,TGFB2,PID1,DDX58,SPHK1,CARD8,VEGFC,PTGS2,EGFR,IL6,SAI1,BCL2,SNAI2,PM AIP1,TNFRSF21,EPHA2,DACT1,BCL2L1                   |
| INTERLEUKIN SIGNALING PATHWAY_HOMO SAPIENS_P00036                      | 7.56E-04   | 0.028743032 | IL6,CXCL8,IRS1,IRS2                                                                                                                  |
| MAPK1_MAPK3 SIGNALING_HOMO SAPIENS_R-HSA-5684996                       | 0.00185071 | 0.028902713 | DUSP4,SPRED2,IL6,IRS1,IRS2,DUSP6                                                                                                     |
| REGULATION OF TOLL-LIKE RECEPTOR SIGNALING PATHWAY_HOMO SAPIENS_WP1449 | 0.00203666 | 0.028926255 | IL6,CXCL11,JUN,CXCL8,IRAK2,CCL5,TNFAIP3                                                                                              |
| POSITIVE REGULATION OF BEHAVIOR (GO:0048520)                           | 0.00122324 | 0.028980754 | IL6,EDN1,CXCL8,CCL5,VEGFC,SCG2,THBS1,F3                                                                                              |
| POSITIVE REGULATION OF CELL MIGRATION (GO:0030335)                     | 5.57E-04   | 0.029618705 | EDN1,TGFB2,CXCL8,IRS1,ANXA3,SPHK1,PRKCE,VEGFC,IRS2,PTGS2,THBS1,F3,HDAC9,EGFR,CYR61,IL6,BMP2,CCL5,BCL2,SNAI2,CDH13,SOX9               |
| SIGNALING BY FGFR4_HOMO SAPIENS_R-HSA-5654743                          | 0.00117371 | 0.029731862 | DUSP4,SPRED2,IRS1,AGO2,SPRY2,IRS2,DUSP6,IER3                                                                                         |
| RESPONSE TO VIRUS (GO:0009615)                                         | 5.73E-04   | 0.029734995 | SERPINB3,DDX58,IFI44,ISG15,ADARB1,DCLK1,OASL,FOSL1,ISG20,IFIH1,IL6,CCL5,CYP1A1,BCL2,PM AIP1,GBP1,BCL2L1                              |
| SIGNALING BY FGFR1_HOMO SAPIENS_R-HSA-5654736                          | 0          | 0.029983453 | DUSP4,SPRED2,IRS1,AGO2,SPRY2,IRS2,DUSP6,IER3                                                                                         |
| REGULATION OF MUSCLE CELL DIFFERENTIATION (GO:0051147)                 | 6.51E-04   | 0.03018443  | EFNB2,EDN1,BMP2,DDIT3,BHLHE41,BCL2,SOX9,DKK1,HDAC9                                                                                   |
| SIGNALING BY FGFR2_HOMO SAPIENS_R-HSA-5654738                          | 0.00233645 | 0.030239318 | DUSP4,SPRED2,IRS1,AGO2,SPRY2,IRS2,DUSP6,IER3                                                                                         |
| POSITIVE REGULATION OF INNATE IMMUNE RESPONSE (GO:0045089)             | 0.00121507 | 0.030241227 | DUSP4,IFIH1,JUN,DDX58,IRAK2,CCL5,TNFAIP3,BCL10,DUSP6,BIRC3                                                                           |
| CYTOKINE SIGNALING IN IMMUNE SYSTEM_HOMO SAPIENS_R-HSA-1280215         | 5.33E-04   | 0.031034347 | DUSP4,ISG20,SPRED2,IL6,DDX58,IRS1,ISG15,IRS2,IL7R,DUSP6,BIRC3,OASL                                                                   |
| NEGATIVE REGULATION OF MAP KINASE ACTIVITY (GO:0043407)                | 0          | 0.031773083 | DUSP4,SPRED2,SPRY2,DUSP6                                                                                                             |
| POSITIVE REGULATION OF CELL MOTILITY (GO:2000147)                      | 0.00112045 | 0.033348013 | EDN1,TGFB2,CXCL8,IRS1,ANXA3,SPHK1,PRKCE,VEGFC,IRS2,PTGS2,THBS1,F3,HDAC9,EGFR,CYR61,IL6,BMP2,CCL5,BCL2,SNAI2,CDH13,SOX9               |
| POSITIVE REGULATION OF CELLULAR COMPONENT MOVEMENT (GO:0051272)        | 0.00110988 | 0.033505257 | EDN1,TGFB2,CXCL8,IRS1,ANXA3,SPHK1,PRKCE,VEGFC,IRS2,PTGS2,THBS1,F3,HDAC9,EGFR,CYR61,IL6,BMP2,BCL6,CCL5,BCL2,SNAI2,CDH13,SOX9          |
| REGULATION OF LEUKOCYTE MIGRATION (GO:0002685)                         | 0.00129786 | 0.033555984 | IL6,EDN1,CXCL8,CCL5,VEGFC,THBS1                                                                                                      |
| SIGNALING BY FGFR_HOMO SAPIENS_R-HSA-190236                            | 0          | 0.03366679  | DUSP4,SPRED2,IRS1,AGO2,SPRY2,IRS2,DUSP6,IER3                                                                                         |
| PATTERN RECOGNITION RECEPTOR SIGNALING PATHWAY (GO:0002221)            | 0.00123533 | 0.036397062 | DUSP4,IFIH1,JUN,DDX58,IRAK2,TNFAIP3,BCL10,DUSP6,BIRC3                                                                                |
| INNATE IMMUNE RESPONSE-ACTIVATING SIGNAL TRANSDUCTION (GO:0002758)     | 6.25E-04   | 0.038572934 | DUSP4,IFIH1,JUN,DDX58,IRAK2,TNFAIP3,BCL10,DUSP6,BIRC3                                                                                |



|                                                                              |            |             |                                                                                                                       |
|------------------------------------------------------------------------------|------------|-------------|-----------------------------------------------------------------------------------------------------------------------|
| REGULATION OF INNATE IMMUNE RESPONSE (GO:0045088)                            | 0.00431832 | 0.046441685 | DUSP4,IFIH1,JUN,DDX58,IRAK2,CCL5,TNFAIP3,BCL10,DUSP6,BIRC3                                                            |
| REGULATION OF BEHAVIOR (GO:0050795)                                          | 0.00243754 | 0.047637463 | IL6,EDN1,CXCL8,CCL5,VEGFC,SCG2,THBS1,F3                                                                               |
| RESPONSE TO FIBROBLAST GROWTH FACTOR (GO:0071774)                            | 0.00372209 | 0.04765472  | CXCL8,IRS1,CCL5,AGO2,TNC,SPRY2,IRS2                                                                                   |
| CELLULAR RESPONSE TO BIOTIC STIMULUS (GO:0071216)                            | 0.00190718 | 0.04867306  | ABCA1,IL6,CXCL8,IRAK2,CCL5,DDIT3,TXNIP,TNFAIP3                                                                        |
| SIDS SUSCEPTIBILITY PATHWAYS_HOMO SAPIENS_WP706                              | 0.00264375 | 0.049318876 | RYR2,SNAP25,IL6,JUN,CXCL8,THRB,NFYA,HDAC9                                                                             |
| LEUKOCYTE CHEMOTAXIS (GO:0030595)                                            | 6.53E-04   | 0.052524004 | IL6,CXCL11,EDN1,CXCL8,CCL5,SCG2                                                                                       |
| REGULATION OF CHEMOTAXIS (GO:0050920)                                        | 0.00299222 | 0.05419648  | IL6,EDN1,CXCL8,CCL5,VEGFC,SCG2,THBS1,F3                                                                               |
| SECRETION BY CELL (GO:0032940)                                               | 0.00304878 | 0.05518527  | ABCA1,IL6,EDN1,CCL5,TMEM79,VEGFC,SCG2,THBS1                                                                           |
| POSITIVE REGULATION OF STEM CELL PROLIFERATION (GO:2000648)                  | 0.00274348 | 0.05532315  | NFYA,IRS1,VEGFC,IRS2,SOX9                                                                                             |
| NEGATIVE REGULATION OF PROTEIN SERINE_THREONINE KINASE ACTIVITY (GO:0071901) | 0.00200133 | 0.055681203 | DUSP4,SPRED2,SPRY2,DUSP6                                                                                              |
| MAPK FAMILY SIGNALING CASCADES_HOMO SAPIENS_R-HSA-5683057                    | 0.00119761 | 0.056000385 | DUSP4,SPRED2,IL6,IRS1,AGO2,IRS2,DUSP6                                                                                 |
| NON-ALCOHOLIC FATTY LIVER DISEASE (NAFLD)_HOMO SAPIENS_HSA04932              | 0.00204499 | 0.056360893 | IL6,JUN,NDUFA7,CXCL8,IRS1,DDIT3,IRS2                                                                                  |
| POSITIVE REGULATION OF PROTEIN TRANSPORT (GO:0051222)                        | 0.00504732 | 0.05664086  | CD274,IL6,TGFB2,DDX58,SPHK1,CARD8,SAA1,VEGFC,PTGS2,EGFR,DACT1                                                         |
| REGULATION OF CELL CYCLE PROCESS (GO:0010564)                                | 0.00116279 | 0.05700247  | EDN1,PID1,PRKCE,GATA6,LIF,GIGYF2,RAD51B,CUL4A,FLCN,CCND1,CYP1A1,BCL2,SOX9,HORMAD1,ZNF655,MAD1L1,DACT1,IER3,BCL2L1     |
| ACTIVATION OF INNATE IMMUNE RESPONSE (GO:0002218)                            | 0.00309215 | 0.058400616 | DUSP4,IFIH1,JUN,DDX58,IRAK2,TNFAIP3,BCL10,DUSP6,BIRC3                                                                 |
| SIGNALING BY PDGF_HOMO SAPIENS_R-HSA-186797                                  | 0.00638051 | 0.05900691  | DUSP4,SPRED2,IRS1,AGO2,IRS2,THBS1,DUSP6,IER3                                                                          |
| RESPONSE TO TUMOR NECROSIS FACTOR (GO:0034612)                               | 0.0026936  | 0.059184715 | EDN1,PID1,CXCL8,CCL5,PTGS2,THBS1,TNFRSF21,KLF2                                                                        |
| MONOCARBOXYLIC ACID METABOLIC PROCESS (GO:0032787)                           | 0.00431035 | 0.06335281  | EDN1,SPHK1,ELOVL2,LIAS,PTGS2,PRKAB1,PDP1,SRR,ACOX2,SLCO1B3,UST,CYP1A1,RPP14,ALDH8A1,MGLL                              |
| CELLULAR RESPONSE TO TUMOR NECROSIS FACTOR (GO:0071356)                      | 0.00143575 | 0.06395416  | EDN1,PID1,CXCL8,CCL5,THBS1,TNFRSF21,KLF2                                                                              |
| BEHAVIOR (GO:0007610)                                                        | 0.00547113 | 0.064056285 | JUN,THRB,PRKCE,ETV1,PTGS2,THBS1,OXR1,GIGYF2,EGFR,NPAS2,FOSL1,IL6,BCL2                                                 |
| SIGNALING BY EGFR_HOMO SAPIENS_R-HSA-177929                                  | 0.00576701 | 0.06536959  | DUSP4,SPRED2,IRS1,AGO2,SPRY2,IRS2,DUSP6,IER3                                                                          |
| REGULATION OF CELL ADHESION (GO:0030155)                                     | 0.00497238 | 0.06542526  | PTPRR,CXCL8,PRKCE,TPM1,TNC,VEGFC,THBS1,CYR61,PTPRG,BMP2,BCL6,UBASH3B,CCL5,SAA1,BCL2,SNAI2,CDH13,SOX9,CYTH1,EPHA2,TGM2 |
| MAPK CASCADE (GO:0000165)                                                    | 0.00324044 | 0.06554355  | DUSP4,JUN,IRAK2,CCL5,SOX9,SCG2,DUSP6,EGFR                                                                             |
| REGULATION OF PROTEIN TRANSPORT (GO:0051223)                                 | 0.00247985 | 0.06591955  | CD274,TGFB2,DDX58,SPHK1,CARD8,VEGFC,PTGS2,EGFR,IL6,SAA1,SNAI2,TNFRSF21,DACT1                                          |
| POSITIVE REGULATION OF EPITHELIAL CELL PROLIFERATION (GO:0050679)            | 0.00364964 | 0.06624051  | IL6,JUN,BMP2,CCND1,VEGFC,TNFAIP3,CDH13,SOX9,SCG2,F3,EGFR                                                              |
| MYD88-INDEPENDENT TLR3_TLR4 CASCADE_HOMO SAPIENS_R-HSA-166166                | 0.00205761 | 0.066564776 | DUSP4,JUN,IRAK2,SAA1,DUSP6,BIRC3                                                                                      |
| REGULATION OF PROTEIN KINASE B SIGNALING (GO:0051896)                        | 0.00313283 | 0.06741587  | INPP4B,IL6,SPRY2,THBS1,F3,EPHA2                                                                                       |
| POSITIVE REGULATION OF PROTEIN KINASE B SIGNALING (GO:0051897)               | 0.00207756 | 0.068253644 | IL6,SPRY2,THBS1,F3                                                                                                    |
| INFLUENZA A_HOMO SAPIENS_HSA05164                                            | 0.00465116 | 0.06847375  | IFIH1,IL6,CXCL8,DDX58,CCL5                                                                                            |
| TOLL LIKE RECEPTOR 3 (TLR3) CASCADE_HOMO SAPIENS_R-HSA-168164                | 0.00210674 | 0.06901073  | DUSP4,JUN,IRAK2,SAA1,DUSP6,BIRC3                                                                                      |
| CELL-TYPE SPECIFIC APOPTOTIC PROCESS (GO:0097285)                            | 0.00283688 | 0.069695525 | GNGT1,RYR2,IL6,BCL2,BCL10,TNFRSF21,BCL2L1                                                                             |
| RIG-I-LIKE RECEPTOR SIGNALING PATHWAY_HOMO SAPIENS_HSA04622                  | 0.00435098 | 0.070998356 | IFIH1,CXCL8,DDX58,ISG15                                                                                               |
| ACTIVATED TLR4 SIGNALLING_HOMO SAPIENS_R-HSA-166054                          | 0.00266667 | 0.07113266  | DUSP4,JUN,IRAK2,SAA1,DUSP6,BIRC3                                                                                      |
| NEGATIVE REGULATION OF PURINE NUCLEOTIDE METABOLIC PROCESS (GO:1900543)      | 0.00289226 | 0.07118217  | EDN1,PID1,SPRY2,SH3BP4                                                                                                |
| SIGNALING BY SCF-KIT_HOMO SAPIENS_R-HSA-1433557                              | 0.0066305  | 0.071652986 | DUSP4,SPRED2,IRS1,AGO2,IRS2,DUSP6,IER3                                                                                |
| LIPID CATABOLIC PROCESS (GO:0016042)                                         | 0.00422833 | 0.07166646  | PLCB4,ACOX2,IRS1,SPHK1,MGLL                                                                                           |
| TRIF-MEDIATED TLR3_TLR4 SIGNALING_HOMO SAPIENS_R-HSA-937061                  | 0.00208044 | 0.071672745 | DUSP4,JUN,IRAK2,SAA1,DUSP6,BIRC3                                                                                      |
| REGULATION OF MULTI-ORGANISM PROCESS (GO:0043900)                            | 0.00916905 | 0.07169645  | ISG20,CXCL8,SPINK1,DDX58,CCL5,TNFAIP3,PTX3,ISG15,ADARB1,BIRC3,OASL                                                    |
| POSITIVE REGULATION OF CELL ACTIVATION (GO:0050867)                          | 0.00837321 | 0.07444609  | CD274,IL6,BCL6,CCL5,IRS2,BCL10,IL7R,THBS1                                                                             |
| SINGLE-ORGANISM BEHAVIOR (GO:0044708)                                        | 0.00434783 | 0.07547154  | FOSL1,JUN,PRKCE,BCL2,ETV1,PTGS2,THBS1,OXR1,GIGYF2,EGFR,NPAS2                                                          |
| RESPONSE TO INORGANIC SUBSTANCE (GO:0010035)                                 | 0.00908575 | 0.075513065 | RYR2,JUN,TXNRD2,SPHK1,TNFAIP3,THBS1,EGFR,KLF2,FOSL1,IL6,CCND1,CYP1A1,BCL2,TXNIP,GART                                  |
| CELLULAR RESPONSE TO LIPOPOLYSACCHARIDE (GO:0071222)                         | 0.0091683  | 0.07563052  | ABCA1,IL6,CXCL8,IRAK2,CCL5,TNFAIP3                                                                                    |
| REGULATION OF MITOTIC CELL CYCLE PHASE TRANSITION (GO:1901990)               | 0.00567108 | 0.07577528  | RAD51B,CUL4A,PID1,CCND1,CYP1A1,BCL2,ZNF655,GIGYF2,MAD1L1,DACT1,IER3,BCL2L1                                            |
| NEGATIVE REGULATION OF NUCLEOTIDE METABOLIC PROCESS (GO:0045980)             | 0.0043573  | 0.0760714   | EDN1,PID1,SPRY2,SH3BP4                                                                                                |

|                                                                            |            |             |                                                                                      |
|----------------------------------------------------------------------------|------------|-------------|--------------------------------------------------------------------------------------|
| CELLULAR RESPONSE TO LIPID (GO:0071396)                                    | 0.00852273 | 0.07618898  | ABCA1,IL6,PID1,CXCL8,THRB,IRAK2,CCL5,TNC,TNFAIP3,SOX9                                |
| CELLULAR RESPONSE TO MOLECULE OF BACTERIAL ORIGIN (GO:0071219)             | 0.00529801 | 0.076322004 | ABCA1,IL6,CXCL8,IRAK2,CCL5,TNFAIP3                                                   |
| DOWNSTREAM SIGNAL TRANSDUCTION_HOMO SAPIENS_R-HSA-186763                   | 0.00603136 | 0.07714068  | DUSP4,SPRED2,IRS1,AGO2,IRS2,DUSP6,IER3                                               |
| VEGFR2 MEDIATED CELL PROLIFERATION_HOMO SAPIENS_R-HSA-5218921              | 0.00925355 | 0.07750045  | DUSP4,SPRED2,IRS1,SPHK1,IRS2,DUSP6                                                   |
| TNF SIGNALING PATHWAY_HOMO SAPIENS_HSA04668                                | 0.006875   | 0.07976957  | IL6,EDN1,JUN,JAG1,CCL5,LIF,VEGFC,TNFAIP3,PTGS2,BIRC3                                 |
| DOWNSTREAM SIGNALING OF ACTIVATED FGFR3_HOMO SAPIENS_R-HSA-5654708         | 0.00591716 | 0.08037108  | DUSP4,SPRED2,IRS1,AGO2,IRS2,DUSP6,IER3                                               |
| CELLULAR RESPONSE TO CYTOKINE STIMULUS (GO:0071345)                        | 0.00437159 | 0.081886984 | EDN1,PID1,CXCL8,ISG15,THBS1,OASL,ISG20,IL6,CXCL11,IRAK2,CCL5,SOX9,IL7R               |
| REGULATION OF GRANULOCYTE CHEMOTAXIS (GO:0071622)                          | 0.00592154 | 0.08215986  | EDN1,CXCL8,CCL5,THBS1                                                                |
| SIGNALING BY ERBB4_HOMO SAPIENS_R-HSA-1236394                              | 0.00596659 | 0.08233849  | DUSP4,SPRED2,IRS1,AGO2,IRS2,DUSP6,IER3                                               |
| DAP12 SIGNALING_HOMO SAPIENS_R-HSA-2424491                                 | 0.00654372 | 0.08236539  | DUSP4,SPRED2,IRS1,AGO2,IRS2,DUSP6,IER3                                               |
| RESPONSE TO DRUG (GO:0042493)                                              | 0.00802292 | 0.082616284 | ABCA1,EDN1,JUN,VEGFC,THBS1,DUSP6,EGFR,FOSL1,IL6,SRR,CCND1,LOX,CYP1A1,BCL2,TXNIP      |
| DOWNSTREAM SIGNALING OF ACTIVATED FGFR2_HOMO SAPIENS_R-HSA-5654696         | 0.00522648 | 0.08274677  | DUSP4,SPRED2,IRS1,AGO2,IRS2,DUSP6,IER3                                               |
| TOLL-LIKE RECEPTOR SIGNALING PATHWAY_HOMO SAPIENS_HSA04620                 | 0.00498221 | 0.08287968  | IL6,CXCL11,CXCL8,CCL5                                                                |
| DAP12 INTERACTIONS_HOMO SAPIENS_R-HSA-2172127                              | 0.01016746 | 0.08292123  | DUSP4,SPRED2,IRS1,AGO2,IRS2,DUSP6,IER3                                               |
| NEGATIVE REGULATION OF NUCLEOSIDE METABOLIC PROCESS (GO:0045978)           | 0.00597907 | 0.08297979  | PID1,SPRY2,SH3BP4                                                                    |
| DOWNSTREAM SIGNALING OF ACTIVATED FGFR4_HOMO SAPIENS_R-HSA-5654716         | 0.00955224 | 0.08358416  | DUSP4,SPRED2,IRS1,AGO2,IRS2,DUSP6,IER3                                               |
| POSITIVE REGULATION OF DEFENSE RESPONSE (GO:0031349)                       | 0.00399088 | 0.08361114  | DUSP4,JUN,DDX58,TNFAIP3,BCL10,DUSP6,EGFR,IFIH1,IL6,IRAK2,CCL5,BIRC3,TGM2             |
| REGULATION OF REACTIVE OXYGEN SPECIES METABOLIC PROCESS (GO:2000377)       | 0.00842697 | 0.08380972  | PID1,GADD45A,THBS1,EGFR,BIRC3,IER3                                                   |
| SMALL MOLECULE BIOSYNTHETIC PROCESS (GO:0044283)                           | 0.00973236 | 0.083816536 | EDN1,ELOVL2,LIAS,PTGS2,FGF2,PRKAB1,SRR,ACOX2,MTHFD2L,UST,CYP1A1,ALDH8A1,GART,MGLL    |
| TRANSCRIPTIONAL MISREGULATION IN CANCER_HOMO SAPIENS_HSA05202              | 0.00715991 | 0.08396103  | IL6,CXCL8,BCL6,ETV1,DUSP6,BIRC3                                                      |
| REGULATION OF CELL CYCLE PHASE TRANSITION (GO:1901987)                     | 0.00641437 | 0.08407585  | RAD51B,CUL4A,PID1,CCND1,CYP1A1,BCL2,ZNF655,GIGYF2,MAD1L1,DACT1,IER3,BCL2L1           |
| AGE-RAGE SIGNALING PATHWAY IN DIABETIC COMPLICATIONS_HOMO SAPIENS_HSA04933 | 0.01386263 | 0.08420209  | IL6,EDN1,JUN,TGFB2,CXCL8,PLCB4,CCND1,PRKCE,BCL2,VEGFC,F3                             |
| DOWNSTREAM SIGNALING OF ACTIVATED FGFR1_HOMO SAPIENS_R-HSA-5654687         | 0.01294118 | 0.084466435 | DUSP4,SPRED2,IRS1,AGO2,IRS2,DUSP6,IER3                                               |
| NEGATIVE REGULATION OF VIRAL PROCESS (GO:0048525)                          | 0.00967118 | 0.08448238  | ISG20,CCL5,PTX3,ISG15,OASL                                                           |
| POSITIVE REGULATION OF LEUKOCYTE ACTIVATION (GO:0002696)                   | 0.00961539 | 0.08475803  | CD274,IL6,BCL6,CCL5,IRS2,BCL10,IL7R,THBS1                                            |
| SHC1 EVENTS IN EGFR SIGNALING_HOMO SAPIENS_R-HSA-180336                    | 0.00991326 | 0.08482032  | DUSP4,SPRED2,IRS1,IRS2,DUSP6                                                         |
| LIPID BIOSYNTHETIC PROCESS (GO:0008610)                                    | 0.01053284 | 0.08494102  | EDN1,SPHK1,ELOVL2,LIAS,PTGS2,FGF2,PRKAB1,INPP4B,ACOX2,CYP1A1,PIGL,ALDH8A1,AJUBA,MGLL |
| SIGNALING PATHWAYS IN GLIOBLASTOMA_HOMO SAPIENS_WP2261                     | 0.00220751 | 0.085006595 | ERRF1,CCND1,IRS1,SPRY2,EGFR                                                          |
| PEPTIDYL-TYROSINE DEPHOSPHORYLATION (GO:0035335)                           | 0.00856955 | 0.085065186 | DUSP4,PTPRR,UBASH3B,DUSP6,PTPRG                                                      |
| IMMUNE RESPONSE-ACTIVATING SIGNAL TRANSDUCTION (GO:0002757)                | 0.01499423 | 0.08520345  | DUSP4,JUN,DDX58,PRKCE,TNFAIP3,BCL10,DUSP6,IFIH1,ENAH,IRAK2,BCL2,TNFRSF21,BIRC3       |
| NEGATIVE REGULATION OF INTRACELLULAR SIGNAL TRANSDUCTION (GO:1902532)      | 0.00762943 | 0.08538064  | DUSP4,SPRED2,PTPRR,BCL6,SPRY2,SH3BP4,THBS1,DUSP6,EPHA2,DACT1                         |
| NEGATIVE REGULATION OF TRANSPORT (GO:0051051)                              | 0.00824014 | 0.08551345  | EDN1,PID1,SPINK1,IRS1,PRKCE,LIF,IRS2,PTGS2,THBS1,YRDC,IL6,BCL2,SNAI2,TNFRSF21,IER3   |
| RESPONSE TO CALCIUM ION (GO:0051592)                                       | 0.00653168 | 0.08558642  | RYR2,IL6,JUN,CCND1,TXNIP,THBS1,EGFR                                                  |
| NEGATIVE REGULATION OF CYTOKINE PRODUCTION (GO:0001818)                    | 0.00866873 | 0.08569638  | IFIH1,IL6,BCL6,DDX58,GATA6,TNFAIP3,ISG15,THBS1,TNFRSF21,KLF2                         |
| TOLL-LIKE RECEPTOR SIGNALING PATHWAY_HOMO SAPIENS_WP75                     | 0.00724113 | 0.08571813  | IL6,CXCL11,CXCL8,CCL5                                                                |
| SIGNALING BY INTERLEUKINS_HOMO SAPIENS_R-HSA-449147                        | 0.00845547 | 0.085936375 | DUSP4,SPRED2,IL6,IRS1,IRS2,IL7R,DUSP6                                                |
| RESPONSE TO EXTRACELLULAR STIMULUS (GO:0009991)                            | 0.00848416 | 0.08595282  | ABCA1,JUN,SPHK1,TNC,BCL10,PTGS2,EGFR,FOSL1,IL6,CCND1,DDIT3,STC2,CYP1A1,BCL2,PMAIP1   |
| ARMS-MEDIATED ACTIVATION_HOMO SAPIENS_R-HSA-170984                         | 0.01111797 | 0.08595473  | DUSP4,SPRED2,IRS1,IRS2,DUSP6                                                         |
| REGULATION OF LEUKOCYTE APOPTOTIC PROCESS (GO:2000106)                     | 0.00601052 | 0.088058785 | BCL6,CCL5,IRS2,BCL10                                                                 |

|                                                                            |            |             |                                                                                                                        |
|----------------------------------------------------------------------------|------------|-------------|------------------------------------------------------------------------------------------------------------------------|
| PROLONGED ERK ACTIVATION EVENTS_HOMO SAPIENS_R-HSA-169893                  | 0.01288344 | 0.08807814  | DUSP4,SPRED2,IRS1,IRS2,DUSP6                                                                                           |
| REGULATION OF CYTOKINE PRODUCTION (GO:0001817)                             | 0.00786075 | 0.08819868  | CD274,TGFB2,DDX58,SPHK1,CARD8,GATA6,TNFAIP3,ISG15,BCL10,DTX4,PTGS2,THBS1,KLF2,IFIH1,IL6,BCL6,DDIT3,SAA1,SNAI2,TNFRSF21 |
| POSITIVE REGULATION OF PROTEIN IMPORT INTO NUCLEUS (GO:0042307)            | 0.00929235 | 0.08823063  | IL6,DDX58,SPHK1,DACT1                                                                                                  |
| RESPONSE TO REACTIVE OXYGEN SPECIES (GO:0000302)                           | 0.01044868 | 0.08834711  | FOSL1,IL6,JUN,TXNRD2,SPHK1,TPM1,BCL2,TXNIP,TNFAIP3,KLF2                                                                |
| SIGNALING BY LEPTIN_HOMO SAPIENS_R-HSA-2586552                             | 0.01719902 | 0.08839871  | DUSP4,SPRED2,IRS1,IRS2,DUSP6                                                                                           |
| RESPONSE TO PROGESTERONE (GO:0032570)                                      | 0.00782361 | 0.08843364  | FOSL1,SPHK1,TXNIP,THBS1                                                                                                |
| SIGNALING BY VEGF_HOMO SAPIENS_R-HSA-194138                                | 0.01353738 | 0.088488415 | DUSP4,SPRED2,IRS1,SPHK1,VEGFC,IRS2,DUSP6                                                                               |
| SIGNALING BY WNT_HOMO SAPIENS_R-HSA-195721                                 | 0.00861009 | 0.08857965  | GNGT1,AGO2,RSPO3,ROR1,SOX9,DKK1,DACT1                                                                                  |
| HEPATITIS C_HOMO SAPIENS_HSA05160                                          | 0.00769769 | 0.08886272  | CXCL8,DDX58,PPP2R2D,CLDN1                                                                                              |
| GRB2 EVENTS IN EGFR SIGNALING_HOMO SAPIENS_R-HSA-179812                    | 0.00809969 | 0.08908706  | DUSP4,SPRED2,IRS1,IRS2,DUSP6                                                                                           |
| FRS-MEDIATED FGFR1 SIGNALING_HOMO SAPIENS_R-HSA-5654693                    | 0.0124844  | 0.089140415 | DUSP4,SPRED2,IRS1,IRS2,DUSP6                                                                                           |
| REGULATION OF VIRAL PROCESS (GO:0050792)                                   | 0.01153613 | 0.08916335  | ISG20,CXCL8,CCL5,PTX3,ISG15,ADARB1,OASL                                                                                |
| MORPHOGENESIS OF AN EPITHELIUM (GO:0002009)                                | 0.00676437 | 0.08916446  | RYR2,EDN1,FOXD1,JAG1,TNC,VEGFC,EGFR,IL6,BMP2,BCL2,RSPO3,SOX9,EPHA2,TGM2                                                |
| REGULATION OF NUCLEOCYTOPLASMIC TRANSPORT (GO:0046822)                     | 0.0136646  | 0.089166015 | INPP4B,IL6,DDX58,SPHK1,SNAI2,EGFR,DACT1,IER3                                                                           |
| SHC1 EVENTS IN ERBB4 SIGNALING_HOMO SAPIENS_R-HSA-1250347                  | 0.01489758 | 0.08917179  | DUSP4,SPRED2,IRS1,IRS2,DUSP6                                                                                           |
| REGULATION OF STEM CELL PROLIFERATION (GO:0072091)                         | 0.00962199 | 0.08918695  | NFYA,IRS1,VEGFC,SNAI2,IRS2,SOX9                                                                                        |
| LEUKOCYTE MIGRATION (GO:0050900)                                           | 0.01244555 | 0.089277714 | IL6,CXCL11,EDN1,CXCL8,CCL5,SCG2                                                                                        |
| FRS-MEDIATED FGFR4 SIGNALING_HOMO SAPIENS_R-HSA-5654712                    | 0.01220256 | 0.08934107  | DUSP4,SPRED2,IRS1,IRS2,DUSP6                                                                                           |
| POSITIVE REGULATION OF LEUKOCYTE PROLIFERATION (GO:0070665)                | 0.0096022  | 0.08948557  | CD274,IL6,BCL6,CCL5,IRS2                                                                                               |
| NGF SIGNALLING VIA TRKA FROM THE PLASMA MEMBRANE_HOMO SAPIENS_R-HSA-187037 | 0.01957296 | 0.0895527   | DUSP4,SPRED2,IRS1,AGO2,IRS2,DUSP6,IER3                                                                                 |
| RESPONSE TO METAL ION (GO:0010038)                                         | 0.01208459 | 0.08955971  | RYR2,IL6,JUN,CCND1,SPHK1,CYP1A1,BCL2,TXNIP,THBS1,EGFR                                                                  |
| RESPONSE TO PURINE-CONTAINING COMPOUND (GO:0014074)                        | 0.0064982  | 0.08962952  | FOSL1,RYR2,IL6,JUN,SPHK1                                                                                               |
| NCAM SIGNALING FOR NEURITE OUT-GROWTH_HOMO SAPIENS_R-HSA-375165            | 0.00991941 | 0.0896903   | DUSP4,SPRED2,IRS1,IRS2,DUSP6                                                                                           |
| POSITIVE REGULATION OF LYMPHOCYTE PROLIFERATION (GO:0050671)               | 0.01081081 | 0.089813426 | CD274,IL6,BCL6,CCL5,IRS2                                                                                               |
| MONOCARBOXYLIC ACID BIOSYNTHETIC PROCESS (GO:0072330)                      | 0.00965873 | 0.08991038  | EDN1,SRR,ACOX2,ELOVL2,UST,CYP1A1,LIAS,PTGS2,ALDH8A1,PRKAB1,MGLL                                                        |
| SIGNALLING TO ERKS_HOMO SAPIENS_R-HSA-187687                               | 0.0093985  | 0.08997404  | DUSP4,SPRED2,IRS1,IRS2,DUSP6                                                                                           |
| SIGNALLING TO P38 VIA RIT AND RIN_HOMO SAPIENS_R-HSA-187706                | 0.01201011 | 0.08999913  | DUSP4,SPRED2,IRS1,IRS2,DUSP6                                                                                           |
| REGULATION OF LYMPHOCYTE APOPTOTIC PROCESS (GO:0070228)                    | 0.01259259 | 0.090015225 | BCL6,CCL5,IRS2,BCL10                                                                                                   |
| SIGNALLING TO RAS_HOMO SAPIENS_R-HSA-167044                                | 0.01177929 | 0.09003018  | DUSP4,SPRED2,IRS1,IRS2,DUSP6                                                                                           |
| POSITIVE REGULATION OF INTRACELLULAR PROTEIN TRANSPORT (GO:0090316)        | 0.00906555 | 0.090066575 | IL6,DDX58,SPHK1,DACT1                                                                                                  |
| FRS-MEDIATED FGFR3 SIGNALING_HOMO SAPIENS_R-HSA-5654706                    | 0.01125    | 0.090205744 | DUSP4,SPRED2,IRS1,IRS2,DUSP6                                                                                           |
| REGULATION OF HORMONE LEVELS (GO:0010817)                                  | 0.00836013 | 0.09021323  | CPA3,IL6,EDN1,SCG5,DHRS2                                                                                               |
| SOS-MEDIATED SIGNALLING_HOMO SAPIENS_R-HSA-112412                          | 0.0067734  | 0.090219    | DUSP4,SPRED2,IRS1,IRS2,DUSP6                                                                                           |
| INTERLEUKIN-3 5 AND GM-CSF SIGNALING_HOMO SAPIENS_R-HSA-512988             | 0.0142063  | 0.0902249   | DUSP4,SPRED2,IRS1,IRS2,DUSP6                                                                                           |
| FRS2-MEDIATED ACTIVATION_HOMO SAPIENS_R-HSA-170968                         | 0.01433022 | 0.090239815 | DUSP4,SPRED2,IRS1,IRS2,DUSP6                                                                                           |
| TOLL LIKE RECEPTOR 4 (TLR4) CASCADE_HOMO SAPIENS_R-HSA-166016              | 0.01132578 | 0.09026391  | DUSP4,JUN,IRAK2,SAA1,DUSP6,BIRC3                                                                                       |
| CHAGAS DISEASE (AMERICAN TRYPAOSOMIASIS)_HOMO SAPIENS_HSA05142             | 0.01082544 | 0.09039036  | IL6,JUN,CXCL8,PLCB4,CCL5,PPP2R2D                                                                                       |
| CARBOXYLIC ACID BIOSYNTHETIC PROCESS (GO:0046394)                          | 0.0105068  | 0.09040088  | EDN1,ELOVL2,LIAS,PTGS2,PRKAB1,SRR,ACOX2,MTHFD2L,UST,CYP1A1,ALDH8A1,GART,MGLL                                           |
| REGULATION OF EPITHELIAL CELL PROLIFERATION (GO:0050678)                   | 0.01357466 | 0.09046081  | JUN,VEGFC,TNFAIP3,THBS1,F3,EGFR,EFNB2,IL6,BMP2,CCND1,SNAI2,CDH13,SOX9,SCG2                                             |
| RESPONSE TO NUTRIENT LEVELS (GO:0031667)                                   | 0.01175088 | 0.090470925 | ABCA1,JUN,SPHK1,TNC,BCL10,PTGS2,EGFR,IL6,CCND1,DDIT3,STC2,CYP1A1,BCL2,PMAIP1                                           |

|                                                                                    |            |             |                                                                                                             |
|------------------------------------------------------------------------------------|------------|-------------|-------------------------------------------------------------------------------------------------------------|
| INTERLEUKIN RECEPTOR SHC SIGNALING_HOMO SAPIENS_R-HSA-912526                       | 0.01997503 | 0.09050358  | DUSP4,SPRED2,IRS1,IRS2,DUSP6                                                                                |
| NOD-LIKE RECEPTOR SIGNALING PATHWAY_HOMO SAPIENS_HSA04621                          | 0.00930233 | 0.09062472  | IL6,CXCL8,CCL5,TNFAIP3,BIRC3                                                                                |
| REGULATION OF DNA METABOLIC PROCESS (GO:0051052)                                   | 0.0122399  | 0.090688206 | IL6,JUN,PID1,CXCL8,BCL6,IL7R,RAD18,EGFR,NPAS2,IER3                                                          |
| INTERLEUKIN-2 SIGNALING_HOMO SAPIENS_R-HSA-451927                                  | 0.01065163 | 0.09075626  | DUSP4,SPRED2,IRS1,IRS2,DUSP6                                                                                |
| NEGATIVE REGULATION OF MUSCLE CELL DIFFERENTIATION (GO:0051148)                    | 0.00654546 | 0.090767026 | BMP2,DDIT3,BHLHE41,SOX9,DKK1                                                                                |
| ORGANIC ACID BIOSYNTHETIC PROCESS (GO:0016053)                                     | 0.01604938 | 0.090780325 | EDN1,ELOVL2,LIAS,PTGS2,PRKAB1,SRR,ACOX2,MTHFD2L,UST,CYP1A1,ALDH8A1,GART,MGLL                                |
| FRS-MEDIATED FGFR2 SIGNALING_HOMO SAPIENS_R-HSA-5654700                            | 0.01180858 | 0.09081796  | DUSP4,SPRED2,IRS1,IRS2,DUSP6                                                                                |
| RAF_MAP KINASE CASCADE_HOMO SAPIENS_R-HSA-5673001                                  | 0.01270648 | 0.09082938  | DUSP4,SPRED2,IRS1,IRS2,DUSP6                                                                                |
| REGULATION OF SYMBIOSIS ENCOMPASSING MUTUALISM THROUGH PARASITISM (GO:0043903)     | 0.0087925  | 0.090856366 | ISG20,CXCL8,CCL5,PTX3,ISG15,ADARB1,OASL                                                                     |
| MICRORNAS IN CANCER_HOMO SAPIENS_HSA05206                                          | 0.01674641 | 0.09098774  | TGFB2,IRS1,PRKCE,TPM1,TNC,IRS2,PTGS2,THBS1,EGFR,CCND1,BCL2,SPRY2,MCL1                                       |
| HERPES SIMPLEX INFECTION_HOMO SAPIENS_HSA05168                                     | 0.01342756 | 0.09100722  | IFIH1,IL6,DDX58,CCL5                                                                                        |
| TRIF-DEPENDENT TOLL-LIKE RECEPTOR SIGNALING PATHWAY (GO:0035666)                   | 0.01686578 | 0.09114178  | DUSP4,JUN,IRAK2,DUSP6,BIRC3                                                                                 |
| NEGATIVE REGULATION OF CELL ADHESION (GO:0007162)                                  | 0.01737968 | 0.09120485  | BMP2,BCL6,UBASH3B,TNC,SNAI2,CDH13,THBS1                                                                     |
| POSITIVE REGULATION OF MONONUCLEAR CELL PROLIFERATION (GO:0032946)                 | 0.01680108 | 0.09121822  | CD274,IL6,BCL6,CCL5,IRS2                                                                                    |
| INNATE IMMUNE SYSTEM_HOMO SAPIENS_R-HSA-168249                                     | 0.00952885 | 0.09122859  | DUSP4,JUN,DDX58,IRS1,TNFAIP3,ISG15,IRS2,BCL10,DTX4,DUSP6,EGFR,IFIH1,SPRED2,IRAK2,AGO2,SAA1,TXNIP,BIRC3,IER3 |
| NEGATIVE REGULATION OF TYPE I INTERFERON PRODUCTION (GO:0032480)                   | 0.00676692 | 0.09124986  | IFIH1,DDX58,TNFAIP3,ISG15                                                                                   |
| POSITIVE REGULATION OF NUCLEOCYTOPLASMIC TRANSPORT (GO:0046824)                    | 0.00606878 | 0.09126266  | IL6,DDX58,SPHK1,DACT1                                                                                       |
| EPITHELIAL CELL DIFFERENTIATION (GO:0030855)                                       | 0.01259748 | 0.09131282  | TAGLN,JUN,BMP2,THRB,JAG1,CYP1A1,BCL2,GATA6,TXNIP,SOX9,KLF2,EPHA2                                            |
| NEGATIVE REGULATORS OF RIG-I_MDA5 SIGNALING_HOMO SAPIENS_R-HSA-936440              | 0.00970149 | 0.09139549  | IFIH1,DDX58,TNFAIP3,ISG15                                                                                   |
| NEGATIVE REGULATION OF HYDROLASE ACTIVITY (GO:0051346)                             | 0.00748848 | 0.09139797  | SPOCD1,SERPINB3,SH3RF2,IL6,SPINK1,SPRY2,SH3BP4,PTX3,THBS1                                                   |
| POSITIVE REGULATION OF LYMPHOCYTE ACTIVATION (GO:0051251)                          | 0.01214329 | 0.09148757  | CD274,IL6,BCL6,CCL5,IRS2,BCL10,IL7R                                                                         |
| IL4-MEDIATED SIGNALING EVENTS_HOMO SAPIENS_CFF33F50-6193-11E5-8AC5-06603EB7F303    | 0.01155235 | 0.09158369  | BCL6,IRS1,IRS2                                                                                              |
| DEPHOSPHORYLATION (GO:0016311)                                                     | 0.01276596 | 0.091692574 | DUSP4,PDP1,INPP4B,PTPRR,UBASH3B,DUSP6,PTPRG                                                                 |
| EPITHELIAL CELL PROLIFERATION (GO:0050673)                                         | 0.01267512 | 0.09171365  | IL6,CCND1,FST,CDH13,SOX9,EPHA2                                                                              |
| TOLL-LIKE RECEPTOR 3 SIGNALING PATHWAY (GO:0034138)                                | 0.01259622 | 0.09192158  | DUSP4,JUN,IRAK2,DUSP6,BIRC3                                                                                 |
| CYTOPLASMIC PATTERN RECOGNITION RECEPTOR SIGNALING PATHWAY (GO:0002753)            | 0.00883653 | 0.09363945  | IFIH1,DDX58,IRAK2,TNFAIP3                                                                                   |
| MYELOID LEUKOCYTE MIGRATION (GO:0097529)                                           | 0.01688049 | 0.093690656 | IL6,EDN1,CXCL8,CCL5,SCG2                                                                                    |
| REGULATION OF LEUKOCYTE PROLIFERATION (GO:0070663)                                 | 0.01408451 | 0.09378819  | CD274,IL6,BCL6,CCL5,BCL2,TNFAIP3,IRS2,TNFRSF21                                                              |
| REGULATION OF MYOTUBE DIFFERENTIATION (GO:0010830)                                 | 0.0095941  | 0.094104476 | DDIT3,BHLHE41,BCL2,SOX9,HDAC9                                                                               |
| RESPONSE TO ALKALOID (GO:0043279)                                                  | 0.02086137 | 0.09414926  | RYR2,IL6,EDN1,SRR,PRKCE,BCL2,HNMT,BCL2L1                                                                    |
| RESPONSE TO LIPOPOLYSACCHARIDE (GO:0032496)                                        | 0.01995305 | 0.09438113  | ABCA1,IL6,EDN1,JUN,SRR,CXCL8,IRAK2,CCL5,CYP1A1,TNFAIP3,LIAS                                                 |
| PI3K-AKT SIGNALING PATHWAY_HOMO SAPIENS_HSA04151                                   | 0.01686341 | 0.09443853  | LAMB3,IRS1,TNC,VEGFC,OSMR,THBS1,EGFR,GNGT1,IL6,CCND1,GNG4,PPP2R2D,PDGFC,BCL2,IL7R,EPHA2,BCL2L1,MCL1         |
| GROWTH (GO:0040007)                                                                | 0.01192504 | 0.09446284  | IL6,EDN1,TNC,SPRY2,SOX9,IL7R,GIGYF2,DCLK1                                                                   |
| CALCIUM-MEDIATED SIGNALING (GO:0019722)                                            | 0.01017442 | 0.09459127  | RYR2,EDN1,CXCL8,SPHK1,EGFR                                                                                  |
| PROTEIN DEPHOSPHORYLATION (GO:0006470)                                             | 0.01619938 | 0.094946116 | DUSP4,PDP1,PTPRR,UBASH3B,DUSP6,PTPRG                                                                        |
| REGULATION OF VIRAL GENOME REPLICATION (GO:0045069)                                | 0.01527689 | 0.097258426 | ISG20,CXCL8,CCL5,ISG15,ADARB1,OASL                                                                          |
| REGULATION OF PROTEIN SECRETION (GO:0050708)                                       | 0.00710227 | 0.09793691  | CD274,IL6,TGFB2,CARD8,SAA1,VEGFC,TNFRSF21                                                                   |
| RIG-I_MDA5 MEDIATED INDUCTION OF IFN-ALPHA_BETA PATHWAYS_HOMO SAPIENS_R-HSA-168928 | 0.01197183 | 0.09807048  | IFIH1,DDX58,SAA1,TNFAIP3,ISG15                                                                              |
| CELL FATE COMMITMENT (GO:0045165)                                                  | 0.02181323 | 0.0983794   | ACVR1,IL6,BMP2,TGFB2,BCL2,SPRY2,SOX9,RUNX2                                                                  |
| CELLULAR RESPONSE TO FIBROBLAST GROWTH FACTOR STIMULUS (GO:0044344)                | 0.01849568 | 0.098609306 | CXCL8,IRS1,CCL5,AGO2,SPRY2,IRS2                                                                             |
| REGULATION OF IMMUNE EFFECTOR PROCESS (GO:0002697)                                 | 0.02060606 | 0.09873231  | IL6,BCL6,DDX58,IL7R,BIRC3                                                                                   |

|                                                                                                        |            |             |                                                                                    |
|--------------------------------------------------------------------------------------------------------|------------|-------------|------------------------------------------------------------------------------------|
| FC EPSILON RECEPTOR (FCERI) SIGNALING_HOMO SAPIENS_R-HSA-2454202                                       | 0.01849711 | 0.098839134 | DUSP4,SPRED2,IRS1,AGO2,IRS2,BCL10,DUSP6,IER3                                       |
| TOLL LIKE RECEPTOR TLR6:TLR2 CASCADE_HOMO SAPIENS_R-HSA-168188                                         | 0.01977401 | 0.098968625 | DUSP4,JUN,IRAK2,SAA1,DUSP6                                                         |
| REGULATION OF ERK1 AND ERK2 CASCADE (GO:0070372)                                                       | 0.02291422 | 0.09901012  | IL6,PTPRR,SPRY2,DUSP6,EPHA2                                                        |
| TRAF6 MEDIATED INDUCTION OF NFKB AND MAP KINASES UPON TLR7_8 OR 9 ACTIVATION_HOMO SAPIENS_R-HSA-975138 | 0.01732502 | 0.09906246  | DUSP4,JUN,IRAK2,SAA1,DUSP6                                                         |
| REGULATION OF INTRACELLULAR TRANSPORT (GO:0032386)                                                     | 0.02122777 | 0.09916547  | RYR2,DDX58,SPHK1,PTGS2,EGFR,INPP4B,IL6,CXCL11,UBASH3B,BCL2,SNAI2,PMAIP1,DACT1,IER3 |
| RESPONSE TO OXIDATIVE STRESS (GO:0006979)                                                              | 0.02757456 | 0.0991728   | JUN,TXNRD2,SPHK1,TPM1,TNFAIP3,LIAS,DHRS2,OXR1,EGFR,KLF2,FOSL1,IL6,STC2,BCL2,TXNIP  |
| REGULATION OF HORMONE SECRETION (GO:0046883)                                                           | 0.01668727 | 0.09918941  | IL6,EDN1,IRS1,CCL5,SCG5,IRS2                                                       |
| MYD88 CASCADE INITIATED ON PLASMA MEMBRANE_HOMO SAPIENS_R-HSA-975871                                   | 0.01336146 | 0.09923533  | DUSP4,JUN,IRAK2,SAA1,DUSP6                                                         |
| EMBRYONIC MORPHOGENESIS (GO:0048598)                                                                   | 0.0167727  | 0.099238    | RYR2,EDN1,MAFB,LRIG1,SPRY2,RSPO3,VEGFC,SOX9,DKK1,DACT1                             |
| RESPONSE TO HYDROGEN PEROXIDE (GO:0042542)                                                             | 0.01083493 | 0.09927581  | FOSL1,IL6,JUN,SPHK1,BCL2,TXNIP,TNFAIP3,KLF2                                        |
| FATTY ACID METABOLIC PROCESS (GO:0006631)                                                              | 0.02465931 | 0.09929374  | EDN1,ACOX2,SPHK1,ELOVL2,CYP1A1,LIAS,RPP14,PTGS2,MGLL                               |
| POSITIVE REGULATION OF PROTEIN LOCALIZATION TO NUCLEUS (GO:1900182)                                    | 0.0147552  | 0.09935633  | IL6,DDX58,SPHK1,LIF,PTGS2,EGFR,DACT1                                               |
| POSITIVE REGULATION OF SYNAPTIC TRANSMISSION (GO:0050806)                                              | 0.01440922 | 0.0994376   | SNAP25,SPHK1,PRKCE,NAT8L,PTGS2,EGFR                                                |
| TOLL LIKE RECEPTOR TLR1:TLR2 CASCADE_HOMO SAPIENS_R-HSA-168179                                         | 0.01597222 | 0.099590294 | DUSP4,JUN,IRAK2,SAA1,DUSP6                                                         |
| TOLL LIKE RECEPTOR 5 (TLR5) CASCADE_HOMO SAPIENS_R-HSA-168176                                          | 0.01257862 | 0.09961472  | DUSP4,JUN,IRAK2,SAA1,DUSP6                                                         |
| REGULATION OF CELLULAR KETONE METABOLIC PROCESS (GO:0010565)                                           | 0.01620527 | 0.09968879  | PDP1,IL6,IRS1,IRS2                                                                 |
| REGULATION OF CARBOHYDRATE BIOSYNTHETIC PROCESS (GO:0043255)                                           | 0.01658604 | 0.099718615 | IL6,IRS1,IRS2                                                                      |
| TOLL LIKE RECEPTOR 10 (TLR10) CASCADE_HOMO SAPIENS_R-HSA-168142                                        | 0.01694915 | 0.099731155 | DUSP4,JUN,IRAK2,SAA1,DUSP6                                                         |
| REGULATION OF MUSCLE ORGAN DEVELOPMENT (GO:0048634)                                                    | 0.01464036 | 0.09979082  | EFNB2,IL6,BMP2,DDIT3,BCL2,GATA6,SOX9,DKK1,HDAC9                                    |
| DIRECT P53 EFFECTORS_HOMO SAPIENS_67C3B75D-6191-11E5-8AC5-06603EB7F303                                 | 0.01964395 | 0.09982809  | JUN,BCL6,NFYA,GADD45A,BCL2,LIF,SNAI2,PMAIP1,DKK1,EGFR,EPHA2,MCL1                   |
| TOLL LIKE RECEPTOR 9 (TLR9) CASCADE_HOMO SAPIENS_R-HSA-168138                                          | 0.01988636 | 0.099881515 | DUSP4,JUN,IRAK2,SAA1,DUSP6                                                         |
| FOXO SIGNALING PATHWAY_HOMO SAPIENS_HSA04068                                                           | 0.0203202  | 0.09989662  | IL6,BCL6,IRS1,IRS2,IL7R                                                            |
| FCERI MEDIATED MAPK ACTIVATION_HOMO SAPIENS_R-HSA-2871796                                              | 0.01717791 | 0.09990984  | DUSP4,SPRED2,IRS1,IRS2,DUSP6                                                       |
| REGULATION OF T CELL DIFFERENTIATION (GO:0045580)                                                      | 0.01397624 | 0.09994338  | IL6,BCL6,IL7R                                                                      |
| NEGATIVE REGULATION OF MITOTIC CELL CYCLE (GO:0045930)                                                 | 0.01641497 | 0.09995994  | BTG3,CCND1,BCL2,ZNF655,GIGYF2,EGFR,MAD1L1,DACT1,IER3,BCL2L1                        |
| MYD88 DEPENDENT CASCADE INITIATED ON ENDOSOME_HOMO SAPIENS_R-HSA-975155                                | 0.01552576 | 0.10008633  | DUSP4,JUN,IRAK2,SAA1,DUSP6                                                         |
| RESPONSE TO MOLECULE OF BACTERIAL ORIGIN (GO:0002237)                                                  | 0.02258251 | 0.10009409  | ABCA1,IL6,EDN1,JUN,SRR,CXCL8,IRAK2,CCL5,CYP1A1,TNFAIP3,BCL10,LIAS                  |
| TRAF6 MEDIATED INDUCTION OF PROINFLAMMATORY CYTOKINES_HOMO SAPIENS_R-HSA-168180                        | 0.01460362 | 0.10014907  | DUSP4,JUN,IRAK2,SAA1,DUSP6                                                         |
| TOLL LIKE RECEPTOR 2 (TLR2) CASCADE_HOMO SAPIENS_R-HSA-181438                                          | 0.01198872 | 0.10027214  | DUSP4,JUN,IRAK2,SAA1,DUSP6                                                         |
| TOLL LIKE RECEPTOR 7_8 (TLR7_8) CASCADE_HOMO SAPIENS_R-HSA-168181                                      | 0.01414427 | 0.100328825 | DUSP4,JUN,IRAK2,SAA1,DUSP6                                                         |
| DIVALENT INORGANIC CATION HOMEOSTASIS (GO:0072507)                                                     | 0.0216987  | 0.10356614  | INPP4B,RYR2,EDN1,CCL5,DDIT3,STC2,PRKCE,SAA1,BCL2,EGFR,TGM2                         |
| NEGATIVE REGULATION OF VIRAL GENOME REPLICATION (GO:0045071)                                           | 0.01798064 | 0.10400655  | ISG20,CCL5,ISG15,OASL                                                              |
| POSITIVE REGULATION OF SEQUENCE-SPECIFIC DNA BINDING TRANSCRIPTION FACTOR ACTIVITY (GO:0051091)        | 0.01933874 | 0.10429333  | FOSL1,IL6,DDX58,IRAK2,SPHK1,BCL10                                                  |
| SIGNALING BY TYPE 1 INSULIN-LIKE GROWTH FACTOR 1 RECEPTOR (IGF1R)_HOMO SAPIENS_R-HSA-2404192           | 0.01778305 | 0.10456859  | DUSP4,SPRED2,IRS1,IRS2,DUSP6                                                       |
| CELLULAR RESPONSE TO EXTERNAL STIMULUS (GO:0071496)                                                    | 0.01716738 | 0.10596281  | FOSL1,JUN,GADD45A,SPHK1,TNC,BCL2,PMAIP1,SOX9,BCL10,PTGS2,EGFR                      |

|                                                                                                         |            |             |                                                                                                                                    |
|---------------------------------------------------------------------------------------------------------|------------|-------------|------------------------------------------------------------------------------------------------------------------------------------|
| REGULATION OF ANGIOGENESIS (GO:0045765)                                                                 | 0.02996475 | 0.10596724  | IL6,TNFRSF12A,ANXA3,SPHK1,GATA6,VEGFC,TNFAIP3,PTGS2,THBS1,F3,HDAC9,EPHA2                                                           |
| SIGNALING BY INSULIN RECEPTOR_HOMO SAPIENS_R-HSA-74752                                                  | 0.0266584  | 0.106099345 | DUSP4,SPRED2,IRS1,IRS2,DUSP6                                                                                                       |
| POSITIVE REGULATION OF B CELL ACTIVATION (GO:0050871)                                                   | 0.02616279 | 0.106262095 | IL6,BCL6,IRS2                                                                                                                      |
| IRS-RELATED EVENTS TRIGGERED BY IGF1R_HOMO SAPIENS_R-HSA-2428928                                        | 0.02467613 | 0.10626693  | DUSP4,SPRED2,IRS1,IRS2,DUSP6                                                                                                       |
| TOLL-LIKE RECEPTORS CASCADES_HOMO SAPIENS_R-HSA-168898                                                  | 0.02076574 | 0.106325716 | DUSP4,JUN,IRAK2,SAA1,DUSP6,BIRC3                                                                                                   |
| MYD88:MAL CASCADE INITIATED ON PLASMA MEMBRANE_HOMO SAPIENS_R-HSA-166058                                | 0.02177068 | 0.10635562  | DUSP4,JUN,IRAK2,SAA1,DUSP6                                                                                                         |
| POSITIVE REGULATION OF POSITIVE CHEMOTAXIS (GO:0050927)                                                 | 0.01890756 | 0.10636473  | CXCL8,VEGFC,CDH13,SCG2,F3                                                                                                          |
| REGULATION OF LYMPHOCYTE DIFFERENTIATION (GO:0045619)                                                   | 0.0212766  | 0.10640381  | IL6,BCL6,IL7R                                                                                                                      |
| ERBB SIGNALING PATHWAY (GO:0038127)                                                                     | 0.01770452 | 0.106469885 | PTPRR,IRS1,AGO2,SPRY2,IRS2,SOX9                                                                                                    |
| REGULATION OF POSITIVE CHEMOTAXIS (GO:0050926)                                                          | 0.01572112 | 0.10663065  | CXCL8,VEGFC,CDH13,SCG2,F3                                                                                                          |
| IGF1R SIGNALING CASCADE_HOMO SAPIENS_R-HSA-2428924                                                      | 0.02565669 | 0.106685124 | DUSP4,SPRED2,IRS1,IRS2,DUSP6                                                                                                       |
| INSULIN RECEPTOR SIGNALLING CASCADE_HOMO SAPIENS_R-HSA-74751                                            | 0.02182045 | 0.10703934  | DUSP4,SPRED2,IRS1,IRS2,DUSP6                                                                                                       |
| VEGFA-VEGFR2 PATHWAY_HOMO SAPIENS_R-HSA-4420097                                                         | 0.02611276 | 0.10723629  | DUSP4,SPRED2,IRS1,SPHK1,IRS2,DUSP6                                                                                                 |
| VALIDATED TARGETS OF C-MYC TRANSCRIPTIONAL REPRESSION_HOMO SAPIENS_6BBDAFA6-6196-11E5-8AC5-06603EB7F303 | 0.02323992 | 0.10755258  | NFYA,CCND1,GADD45A,CCL5,DDIT3,BCL2,DKK1                                                                                            |
| NEGATIVE REGULATION OF CELL CYCLE (GO:0045786)                                                          | 0.02111111 | 0.10764173  | PPP1R15A,BTG3,TGFB2,CXCL8,GADD45A,LIF,TNFAIP3,PTGS2,THBS1,GIGYF2,EGFR,CUL4A,BMP2,CCND1,DDIT3,BCL2,HORMAD1,MAD1L1,DACT1,IER3,BCL2L1 |
| NEUROTROPHIN SIGNALING PATHWAY (GO:0038179)                                                             | 0.02429668 | 0.10877707  | DUSP4,IRS1,AGO2,IRS2,DUSP6                                                                                                         |
| REGULATION OF GLUCOSE METABOLIC PROCESS (GO:0010906)                                                    | 0.02380952 | 0.10900087  | IL6,IRS1,IRS2                                                                                                                      |
| DNA DAMAGE RESPONSE (ONLY ATM DEPENDENT)_HOMO SAPIENS_WP710                                             | 0.02506596 | 0.109123334 | FOSL1,JUN,BCL6,CCND1,IRS1,BCL2,PMAIP1                                                                                              |
| REGULATION OF PROTEIN MODIFICATION BY SMALL PROTEIN CONJUGATION OR REMOVAL (GO:1903320)                 | 0.024      | 0.10945668  | SPHK1,TNFAIP3,ISG15,BCL10,BIRC3                                                                                                    |
| POSITIVE REGULATION OF SECRETION BY CELL (GO:1903532)                                                   | 0.03285803 | 0.10958146  | CD274,IL6,EDN1,TGFB2,SPHK1,PRKCE,CARD8,SAA1,VEGFC,IRS2,RAB27B                                                                      |
| RESPONSE TO GLUCOSE (GO:0009749)                                                                        | 0.01702443 | 0.10972666  | TXNIP,IRS2,THBS1                                                                                                                   |
| TISSUE REMODELING (GO:0048771)                                                                          | 0.02250352 | 0.10984     | IL6,TGFB2,JAG1,LIF,HOXA3,EPHA2,TGM2                                                                                                |
| NEGATIVE REGULATION OF MULTI-ORGANISM PROCESS (GO:0043901)                                              | 0.02581864 | 0.10994586  | ISG20,JUN,CCL5,TNFAIP3,PTX3,ISG15,OASL                                                                                             |
| CHEMOKINE SIGNALING PATHWAY_HOMO SAPIENS_HSA04062                                                       | 0.02188783 | 0.11006861  | GNGT1,CXCL11,CXCL8,PLCB4,CCL5                                                                                                      |
| CELLULAR RESPONSE TO INTERLEUKIN-1 (GO:0071347)                                                         | 0.02896552 | 0.110106535 | EDN1,CXCL8,IRAK2,CCL5,SOX9                                                                                                         |
| NEUROTROPHIN TRK RECEPTOR SIGNALING PATHWAY (GO:0048011)                                                | 0.02652684 | 0.11034576  | DUSP4,IRS1,AGO2,IRS2,DUSP6                                                                                                         |
| PEPTIDE LIGAND-BINDING RECEPTORS_HOMO SAPIENS_R-HSA-375276                                              | 0.02635328 | 0.11054753  | CXCL11,EDN1,CXCL8,CCL5,SAA1                                                                                                        |
| IRS-MEDIATED SIGNALLING_HOMO SAPIENS_R-HSA-112399                                                       | 0.02843315 | 0.11166824  | DUSP4,SPRED2,IRS1,IRS2,DUSP6                                                                                                       |
| REGULATION OF SEQUENCE-SPECIFIC DNA BINDING TRANSCRIPTION FACTOR ACTIVITY (GO:0051090)                  | 0.02228739 | 0.1127494   | FOSL1,IL6,JUN,DDX58,IRAK2,SPHK1,DDIT3,TNFAIP3,BCL10                                                                                |
| RESPONSE TO INTERLEUKIN-1 (GO:0070555)                                                                  | 0.02977346 | 0.113167204 | EDN1,CXCL8,IRAK2,SPHK1,CCL5,SOX9                                                                                                   |
| REGULATION OF LEUKOCYTE ACTIVATION (GO:0002694)                                                         | 0.03103448 | 0.115206905 | CD274,IL6,BCL6,CCL5,TNFAIP3,IRS2,BCL10,IL7R,THBS1                                                                                  |
| TISSUE MORPHOGENESIS (GO:0048729)                                                                       | 0.02480706 | 0.11559695  | RYR2,EDN1,FOXD1,JAG1,TPM1,TNC,VEGFC,EGFR,IL6,BMP2,BCL2,RSPO3,SNAI2,SOX9,EPHA2,TGM2                                                 |
| REGULATION OF CELL ACTIVATION (GO:0050865)                                                              | 0.02664399 | 0.11608129  | CD274,IL6,BCL6,UBASH3B,CCL5,TNFAIP3,IRS2,BCL10,IL7R,THBS1                                                                          |
| POSITIVE REGULATION OF INTRACELLULAR TRANSPORT (GO:0032388)                                             | 0.02694236 | 0.1164248   | IL6,CXCL11,DDX58,SPHK1,DACT1                                                                                                       |
| GRANULOCYTE CHEMOTAXIS (GO:0071621)                                                                     | 0.02031144 | 0.11662957  | EDN1,CXCL8,CCL5,SAA1,SCG2                                                                                                          |
| SIGNAL TRANSDUCTION BY PHOSPHORYLATION (GO:0023014)                                                     | 0.03289058 | 0.116828    | DUSP4,JUN,IRAK2,CCL5,SOX9,SCG2,DUSP6,EGFR                                                                                          |
| REGULATION OF PROTEIN UBIQUITINATION (GO:0031396)                                                       | 0.0260521  | 0.11686695  | SPHK1,TNFAIP3,ISG15,BCL10,BIRC3                                                                                                    |
| SIGNALLING BY NGF_HOMO SAPIENS_R-HSA-166520                                                             | 0.02672865 | 0.1168984   | DUSP4,SPRED2,IRS1,AGO2,IRS2,DUSP6,IER3                                                                                             |
| NEGATIVE REGULATION OF ERK1 AND ERK2 CASCADE (GO:0070373)                                               | 0.02762431 | 0.11698072  | PTPRR,SPRY2,DUSP6                                                                                                                  |
| G ALPHA (I) SIGNALLING EVENTS_HOMO SAPIENS_R-HSA-418594                                                 | 0.02833226 | 0.11734296  | GNGT1,CXCL11,CXCL8,CCL5,SAA1,RS20,RS7                                                                                              |

|                                                                                                                              |            |             |                                                                                                             |
|------------------------------------------------------------------------------------------------------------------------------|------------|-------------|-------------------------------------------------------------------------------------------------------------|
| REGULATION OF NUCLEAR BETA CATENIN SIGNALING AND TARGET GENE TRANSCRIPTION_HOMO SAPIENS_1590A3B3-6195-11E5-8AC5-06603EB7F303 | 0.02331779 | 0.11833839  | JUN,CXCL8,TLE1,CCND1,SNAI2,DKK1                                                                             |
| MULTICELLULAR ORGANISMAL REPRODUCTIVE PROCESS (GO:0048609)                                                                   | 0.02471265 | 0.11881515  | EDN1,THRB,RNF114,BCL6,FST,CYP1A1,HSF2BP,SOX9,HORMAD1,RAD18,EGFR,BIRC3                                       |
| REGULATION OF TRANSLATION (GO:0006417)                                                                                       | 0.02554745 | 0.11978746  | IL6,CCL5,AGO2,ENC1,THBS1,GIGYF2                                                                             |
| CELLULAR CHEMICAL HOMEOSTASIS (GO:0055082)                                                                                   | 0.02925373 | 0.12122305  | INPP4B,RYR2,EDN1,CCL5,DDIT3,STC2,PRKCE,SAA1,BCL2,IRS2,RAB38,TGM2                                            |
| SENSORY PERCEPTION (GO:0007600)                                                                                              | 0.03542062 | 0.12229912  | EDN1,THRB,GJB3,TIMM9,LRIG1,SPRY2,SNAI2                                                                      |
| FORMATION OF PRIMARY GERM LAYER (GO:0001704)                                                                                 | 0.02346041 | 0.122436546 | DUSP4,DKK1,EPHA2                                                                                            |
| POSITIVE REGULATION OF SECRETION (GO:0051047)                                                                                | 0.02960725 | 0.12268689  | CD274,IL6,EDN1,TGFB2,SPHK1,PRKCE,CARD8,SAA1,VEGFC,IRS2,RAB27B                                               |
| CELLULAR CALCIUM ION HOMEOSTASIS (GO:0006874)                                                                                | 0.03298071 | 0.12409176  | INPP4B,RYR2,EDN1,CCL5,DDIT3,STC2,PRKCE,SAA1,BCL2,TGM2                                                       |
| ACTIVATION OF IMMUNE RESPONSE (GO:0002253)                                                                                   | 0.02357677 | 0.124229535 | DUSP4,JUN,DDX58,PRKCE,TNFAIP3,BCL10,DUSP6,IFIH1,ENAH,IRAK2,BCL2,TNFRSF21,BIRC3                              |
| AP-1 TRANSCRIPTION FACTOR NETWORK_HOMO SAPIENS_3CE2F9C5-6189-11E5-8AC5-06603EB7F303                                          | 0.02941177 | 0.1243189   | FOSL1,IL6,EDN1,JUN,CXCL8,CCND1                                                                              |
| CELLULAR DIVALENT INORGANIC CATION HOMEOSTASIS (GO:0072503)                                                                  | 0.02883436 | 0.1245423   | INPP4B,RYR2,EDN1,CCL5,DDIT3,STC2,PRKCE,SAA1,BCL2,TGM2                                                       |
| NOTCH SIGNALING PATHWAY (GO:0007219)                                                                                         | 0.03371501 | 0.124974586 | BMP2,TLE1,JAG1,CCND1,AGO2,SNAI2,MAML3,DTX4,HDAC9                                                            |
| LPA RECEPTOR MEDIATED EVENTS_HOMO SAPIENS_4B994CDE-6194-11E5-8AC5-06603EB7F303                                               | 0.03267974 | 0.12561157  | IL6,JUN,CXCL8,PRKCE,EGFR                                                                                    |
| MAP KINASE ACTIVATION IN TLR CASCADE_HOMO SAPIENS_R-HSA-450294                                                               | 0.02351212 | 0.12583952  | DUSP4,JUN,IRAK2,DUSP6                                                                                       |
| TOLL-LIKE RECEPTOR 4 SIGNALING PATHWAY (GO:0034142)                                                                          | 0.02376103 | 0.12703057  | DUSP4,JUN,IRAK2,DUSP6,BIRC3                                                                                 |
| FIBROBLAST GROWTH FACTOR RECEPTOR SIGNALING PATHWAY (GO:0008543)                                                             | 0.02960103 | 0.12918353  | IRS1,AGO2,SPRY2,IRS2                                                                                        |
| MITOTIC CELL CYCLE CHECKPOINT (GO:0007093)                                                                                   | 0.02925731 | 0.12930368  | CCND1,GIGYF2,MAD1L1,IER3,BCL2L1                                                                             |
| REGULATION OF EPITHELIAL CELL MIGRATION (GO:0010632)                                                                         | 0.03294118 | 0.12950738  | NRP1,PTPRR,EDN1,TGFB2,ANXA3,PRKCE,ITGA2,PDGFB,VEGFC,PTGS2,THBS1,HDAC9,FGF2,PTPRG,SOX9,SLIT2,EPHA2           |
| MYD88-INDEPENDENT TOLL-LIKE RECEPTOR SIGNALING PATHWAY (GO:0002756)                                                          | 0.03183391 | 0.13011351  | DUSP4,JUN,IRAK2,DUSP6,BIRC3                                                                                 |
| DEVELOPMENTAL GROWTH INVOLVED IN MORPHOGENESIS (GO:0060560)                                                                  | 0.02232143 | 0.13011974  | TNC,SPRY2,DCLK1                                                                                             |
| CATION HOMEOSTASIS (GO:0055080)                                                                                              | 0.03315571 | 0.13023448  | INPP4B,RYR2,EDN1,CCL5,DDIT3,STC2,PRKCE,SAA1,BCL2,RAB38,EGFR,TGM2                                            |
| REGULATION OF MITOTIC CELL CYCLE (GO:0007346)                                                                                | 0.03641618 | 0.13038805  | BTG3,EDN1,PID1,SPHK1,PDGFB,GIGYF2,EGFR,THAP1,RAD51B,CUL4A,CCND1,CYP1A1,BCL2,ZNF655,MAD1L1,DACT1,IER3,BCL2L1 |
| REGULATION OF MONONUCLEAR CELL PROLIFERATION (GO:0032944)                                                                    | 0.03550678 | 0.13272074  | CD274,IL6,BCL6,CCL5,BCL2,IRS2,TNFRSF21                                                                      |
| SYNDECAN-4-MEDIATED SIGNALING EVENTS_HOMO SAPIENS_076BC549-6196-11E5-8AC5-06603EB7F303                                       | 0.0197119  | 0.1327364   | CCL5,TNC,THBS1                                                                                              |
| TOLL-LIKE RECEPTOR SIGNALING PATHWAY (GO:0002224)                                                                            | 0.03903709 | 0.13282043  | DUSP4,JUN,IRAK2,BCL10,DUSP6,BIRC3                                                                           |
| CELLULAR ION HOMEOSTASIS (GO:0006873)                                                                                        | 0.0365408  | 0.13302873  | INPP4B,RYR2,EDN1,CCL5,DDIT3,STC2,PRKCE,SAA1,BCL2,RAB38,TGM2                                                 |
| CELLULAR CATION HOMEOSTASIS (GO:0030003)                                                                                     | 0.0419916  | 0.13310824  | INPP4B,RYR2,EDN1,CCL5,DDIT3,STC2,PRKCE,SAA1,BCL2,RAB38,TGM2                                                 |
| CALCIUM ION HOMEOSTASIS (GO:0055074)                                                                                         | 0.03738318 | 0.13323577  | INPP4B,RYR2,EDN1,CCL5,DDIT3,STC2,PRKCE,SAA1,BCL2,TGM2                                                       |
| MORPHOGENESIS OF A BRANCHING STRUCTURE (GO:0001763)                                                                          | 0.03429603 | 0.1344726   | ACVR1,NRP1,EDN1,COL13A1,PDGFB,FGF2,IL6,BMP2,BCL2,RSPO3,SOX9,SLIT2,EPHA2,TGM2                                |
| REGULATION OF MAP KINASE ACTIVITY (GO:0043405)                                                                               | 0.03388823 | 0.1347459   | DUSP4,SPRED2,EDN1,IRAK2,SPRY2,THBS1,DUSP6                                                                   |
| VITAMIN B12 METABOLISM_HOMO SAPIENS_WP1533                                                                                   | 0.02721563 | 0.13485013  | ABCA1,IL6,CCL5,SAA1                                                                                         |
| RESPONSE TO ACID CHEMICAL (GO:0001101)                                                                                       | 0.03617863 | 0.1352796   | ABCA1,IL6,EDN1,PID1,TNC,SH3BP4,SOX9,DKK1                                                                    |
| ATF-2 TRANSCRIPTION FACTOR NETWORK_HOMO SAPIENS_C76C900A-618A-11E5-8AC5-06603EB7F303                                         | 0.03555268 | 0.13532294  | IL6,JUN,CXCL8,CCND1,GADD45A,DDIT3,BCL2                                                                      |
| NEGATIVE REGULATION OF CELL CYCLE PROCESS (GO:0010948)                                                                       | 0.03882877 | 0.13744661  | CCND1,BCL2,LIF,HORMAD1,GIGYF2,MAD1L1,DACT1,IER3,BCL2L1                                                      |
| LONG-CHAIN FATTY ACID METABOLIC PROCESS (GO:0001676)                                                                         | 0.03549383 | 0.1374492   | SPHK1,ELOVL2,CYP1A1,PTGS2,MGLL                                                                              |
| APOPTOSIS-RELATED NETWORK DUE TO ALTERED NOTCH3 IN OVARIAN CANCER_HOMO SAPIENS_WP2864                                        | 0.0238806  | 0.13769756  | IL7R,THBS1,TNFRSF21,IER3                                                                                    |
| POSITIVE REGULATION OF PROTEIN SECRETION (GO:0050714)                                                                        | 0.02575423 | 0.13776438  | CD274,IL6,TGFB2,CARD8,SAA1,VEGFC                                                                            |
| REGULATION OF LYMPHOCYTE PROLIFERATION (GO:0050670)                                                                          | 0.03470858 | 0.13788338  | CD274,IL6,BCL6,CCL5,BCL2,IRS2,TNFRSF21                                                                      |
| G ALPHA (Z) SIGNALLING EVENTS_HOMO SAPIENS_R-HSA-418597                                                                      | 0.02551021 | 0.13988152  | GNGT1,RGS17,GNG4,PRKCE,RGS20                                                                                |

|                                                                                                                      |            |            |                                                                                             |
|----------------------------------------------------------------------------------------------------------------------|------------|------------|---------------------------------------------------------------------------------------------|
| ALPHA9 BETA1 INTEGRIN SIGNALING EVENTS_HOMO SAPIENS_OF5519CF-6188-11E5-8AC5-06603EB7F303                             | 0.0329912  | 0.13999735 | TNC,VEGFC,SAT1                                                                              |
| GRANULOCYTE MIGRATION (GO:0097530)                                                                                   | 0.03099174 | 0.14023876 | EDN1,CXCL8,CCL5,SAA1,SCG2                                                                   |
| POSITIVE REGULATION OF RESPONSE TO EXTERNAL STIMULUS (GO:0032103)                                                    | 0.03658536 | 0.14038624 | IL6,EDN1,CXCL8,CCL5,VEGFC,SCG2,THBS1,F3                                                     |
| REGULATION OF STRIATED MUSCLE TISSUE DEVELOPMENT (GO:0016202)                                                        | 0.03519799 | 0.14045337 | EFNB2,ACVR1,BMP2,DDIT3,BCL2,GATA6,SOX9,DKK1,HDAC9,FGF2                                      |
| REGULATION OF PROTEIN TARGETING (GO:1903533)                                                                         | 0.03213115 | 0.14056045 | IL6,DDX58,SPHK1,SNAI2,EGFR,DACT1                                                            |
| REGULATION OF SKELETAL MUSCLE TISSUE DEVELOPMENT (GO:0048641)                                                        | 0.04063861 | 0.14060557 | ACVR1,DDIT3,BCL2,SOX9,DKK1,HDAC9                                                            |
| INSULIN SIGNALING_HOMO SAPIENS_WP481                                                                                 | 0.03305204 | 0.1408384  | SNAP25,JUN,IRS1,IRS2,STX4                                                                   |
| POSITIVE REGULATION OF T CELL ACTIVATION (GO:0050870)                                                                | 0.03194888 | 0.14097166 | CD274,IL6,CCL5,BCL10,IL7R                                                                   |
| REGULATION OF INTRACELLULAR PROTEIN TRANSPORT (GO:0033157)                                                           | 0.0309822  | 0.14361973 | IL6,DDX58,SPHK1,SNAI2,EGFR,DACT1                                                            |
| POSITIVE REGULATION OF PEPTIDYL-SERINE PHOSPHORYLATION (GO:0033138)                                                  | 0.04027778 | 0.14425153 | IL6,SPRY2                                                                                   |
| POSITIVE REGULATION OF OSSIFICATION (GO:0045778)                                                                     | 0.03840878 | 0.14496726 | ACVR1,IL6,BMP2,TGFB2,JAG1,RUNX2,CYR61                                                       |
| REGULATION OF MUSCLE TISSUE DEVELOPMENT (GO:1901861)                                                                 | 0.04077792 | 0.14532499 | EFNB2,ACVR1,BMP2,DDIT3,BCL2,GATA6,SOX9,DKK1,HDAC9,FGF2                                      |
| EGF_EGFR SIGNALING PATHWAY_HOMO SAPIENS_WP437                                                                        | 0.04623179 | 0.14534949 | ERRFI1,PTPRR,SPRY2                                                                          |
| CYTOKINE-CYTOKINE RECEPTOR INTERACTION_HOMO SAPIENS_HSA04060                                                         | 0.04022989 | 0.1466679  | ACVR1,TGFB2,CXCL8,TNFRSF12A,LIF,VEGFC,OSMR,EGFR,IL6,CXCL11,BMP2,CCL5,PDGFC,IL7R,TNFRSF21    |
| REGULATION OF CELLULAR CARBOHYDRATE METABOLIC PROCESS (GO:0010675)                                                   | 0.04809619 | 0.14774422 | IL6,IRS1,IRS2,IER3                                                                          |
| REGULATION OF G-PROTEIN COUPLED RECEPTOR PROTEIN SIGNALING PATHWAY (GO:0008277)                                      | 0.04299754 | 0.14803502 | GNGT1,RGS17,EDN1,CXCL8,GNG4,CCL5,RGS20,MGLL,GPR158,RGS7                                     |
| GPCR DOWNSTREAM SIGNALING_HOMO SAPIENS_R-HSA-388396                                                                  | 0.03657143 | 0.14807259 | GNGT1,RGS17,CXCL11,EDN1,CXCL8,PLCB4,CCL5,SAA1,RGS20,MGLL,RGS7                               |
| TGF-BETA SIGNALING PATHWAY_HOMO SAPIENS_P00052                                                                       | 0.02930665 | 0.14809336 | FOSL1,ACVR1,JUN,BMP2,TGFB2,MAP3K7CL                                                         |
| RETROGRADE ENDOCANNABINOID SIGNALING_HOMO SAPIENS_HSA04723                                                           | 0.02969562 | 0.14809698 | GNGT1,PLCB4,GNG4,PTGS2,MGLL                                                                 |
| REGULATION OF PROTEIN IMPORT INTO NUCLEUS (GO:0042306)                                                               | 0.03590426 | 0.1481836  | IL6,DDX58,SPHK1,SNAI2,EGFR,DACT1                                                            |
| SECOND-MESSENGER-MEDIATED SIGNALING (GO:0019932)                                                                     | 0.0343461  | 0.14818491 | RYR2,EDN1,CXCL8,SPHK1,SOX9,EGFR                                                             |
| UNSATURATED FATTY ACID METABOLIC PROCESS (GO:0033559)                                                                | 0.03465347 | 0.14822233 | EDN1,SPHK1,ELOVL2,CYP1A1,PTGS2,MGLL                                                         |
| CELL CYCLE CHECKPOINT (GO:0000075)                                                                                   | 0.03963839 | 0.14829318 | CCND1,HORMAD1,GIGYF2,MAD1L1,IER3,BCL2L1                                                     |
| POSITIVE REGULATION OF EPITHELIAL CELL MIGRATION (GO:0010634)                                                        | 0.040625   | 0.1484203  | NRP1,EDN1,TGFB2,ANXA3,PRKCE,ITGA2,PDGFB,VEGFC,PTGS2,THBS1,HDAC9,FGF2,SOX9                   |
| REGULATION OF NEUROLOGICAL SYSTEM PROCESS (GO:0031644)                                                               | 0.03610906 | 0.14861088 | IL6,EDN1,MGLL,TNFRSF21                                                                      |
| TRANSMEMBRANE TRANSPORT OF SMALL MOLECULES_HOMO SAPIENS_R-HSA-382551                                                 | 0.04886212 | 0.15063761 | GNGT1,RYR2,GNG4,MYO5B,SLCO1B3,SLC2A3,NALCN,ANO2                                             |
| INTEGRATED BREAST CANCER PATHWAY_HOMO SAPIENS_WP1984                                                                 | 0.0432295  | 0.15080522 | FOSL1,JUN,CCND1,IRS1,GADD45A,MAP3K7CL,BCL2,EGFR                                             |
| MEASLES_HOMO SAPIENS_HSA05162                                                                                        | 0.03708791 | 0.1509264  | IFIH1,IL6,CCND1,DDX58,TNFAIP3                                                               |
| INSULIN RESISTANCE_HOMO SAPIENS_HSA04931                                                                             | 0.04385965 | 0.15115532 | IL6,IRS1,IRS2                                                                               |
| INTERFERON ALPHA_BETA SIGNALING_HOMO SAPIENS_R-HSA-909733                                                            | 0.03597651 | 0.1518284  | ISG20,ISG15,OASL                                                                            |
| REGULATION OF LYMPHOCYTE ACTIVATION (GO:0051249)                                                                     | 0.04117647 | 0.15425865 | CD274,IL6,BCL6,CCL5,TNFAIP3,IRS2,BCL10,IL7R                                                 |
| RESPONSE TO KETONE (GO:1901654)                                                                                      | 0.04688504 | 0.15432705 | FOSL1,EDN1,CCND1,SPHK1,TXNIP,THBS1,EGFR                                                     |
| MYELOID LEUKOCYTE ACTIVATION (GO:0002274)                                                                            | 0.04752066 | 0.15659487 | JUN,CXCL8,ANXA3,CCL5,PRKCE,DHRS2,RELB                                                       |
| REGULATION OF PEPTIDYL-SERINE PHOSPHORYLATION (GO:0033135)                                                           | 0.0541272  | 0.15777053 | IL6,SPRY2,DKK1                                                                              |
| RESPONSE TO ENDOPLASMIC RETICULUM STRESS (GO:0034976)                                                                | 0.05039267 | 0.15797396 | PPP1R15A,JUN,CXCL8,CCND1,DDIT3,STC2,BCL2,THBS1                                              |
| INTRACELLULAR RECEPTOR SIGNALING PATHWAY (GO:0030522)                                                                | 0.04618227 | 0.1588073  | IFIH1,RBM14,THRB,DDX58,IRAK2,BCL2,TXNIP,TNFAIP3,BCL2L1                                      |
| REGULATION OF CYCLIC NUCLEOTIDE METABOLIC PROCESS (GO:0030799)                                                       | 0.03445635 | 0.1588684  | ABCA1,CXCL11,EDN1                                                                           |
| RESPONSE TO TYPE I INTERFERON (GO:0034340)                                                                           | 0.03736264 | 0.15977755 | ISG20,ISG15,OASL                                                                            |
| NUCLEOTIDE-BINDING DOMAIN LEUCINE RICH REPEAT CONTAINING RECEPTOR (NLR) SIGNALING PATHWAYS_HOMO SAPIENS_R-HSA-168643 | 0.04041096 | 0.16011046 | IRAK2,BCL2,TXNIP,TNFAIP3,BIRC3,BCL2L1                                                       |
| REGULATION OF CELL CYCLE G1_S PHASE TRANSITION (GO:1902806)                                                          | 0.04689564 | 0.16017501 | CUL4A,PID1,CCND1,CYP1A1,BCL2,ZNF655,GIGYF2,DACT1                                            |
| ANGIOGENESIS (GO:0001525)                                                                                            | 0.05192532 | 0.16034986 | NRP1,JUN,TGFB2,CXCL8,JAG1,TNFRSF12A,FN1,VEGFC,PTGS2,SAT1,THBS1,CYR61,HOXA3,CDH13,SCG2,EPHA2 |



|                                                                                                  |            |            |                                                                                                         |
|--------------------------------------------------------------------------------------------------|------------|------------|---------------------------------------------------------------------------------------------------------|
| TWEAK SIGNALING PATHWAY_HOMO SAPIENS_WP2036                                                      | 0.04034582 | 0.16279334 | IL6,JUN,TNFRSF12A,CCL5,BIRC3,RELB                                                                       |
| REGULATION OF RAS PROTEIN SIGNAL TRANSDUCTION (GO:0046578)                                       | 0.05053908 | 0.1631174  | ABCA1,BCL6,SPRY2                                                                                        |
| POSITIVE REGULATION OF SMOOTH MUSCLE CELL PROLIFERATION (GO:0048661)                             | 0.05       | 0.16577965 | IL6,EDN1,JUN,CCL5,CDH13,EGFR,TGM2                                                                       |
| NEGATIVE REGULATION OF CATABOLIC PROCESS (GO:0009895)                                            | 0.04497355 | 0.16620047 | BCL2,SPRY2,SH3BP4,EGFR,MAD1L1,IER3,BCL2L1                                                               |
| TOLL-LIKE RECEPTOR 2 SIGNALING PATHWAY (GO:0034134)                                              | 0.03862661 | 0.16630861 | DUSP4,JUN,IRAK2,DUSP6                                                                                   |
| NEGATIVE REGULATION OF HORMONE SECRETION (GO:0046888)                                            | 0.04492053 | 0.1664696  | IL6,EDN1,IRS1                                                                                           |
| CELL-CELL ADHESION (GO:0098609)                                                                  | 0.04778637 | 0.1667154  | PCDH9,AMIGO2,CDH13,CLDN1                                                                                |
| MAPK SIGNALING PATHWAY_HOMO SAPIENS_WP382                                                        | 0.04323308 | 0.16674723 | DUSP4,PTPRR,JUN,GADD45A,DDIT3,DUSP6,EGFR                                                                |
| REGULATION OF CAMP METABOLIC PROCESS (GO:0030814)                                                | 0.04118497 | 0.16722266 | ABCA1,CXCL11,EDN1                                                                                       |
| CELL-CELL ADHESION VIA PLASMA-MEMBRANE ADHESION MOLECULES (GO:0098742)                           | 0.03971119 | 0.16738053 | PCDH9,AMIGO2,CDH13,CLDN1                                                                                |
| INTEGRIN CELL SURFACE INTERACTIONS_HOMO SAPIENS_R-HSA-216083                                     | 0.04659014 | 0.16827577 | COL13A1,TNC,THBS1                                                                                       |
| FOCAL ADHESION_HOMO SAPIENS_WP306                                                                | 0.04379124 | 0.16968043 | JUN,LAMB3,CCND1,TNC,BCL2,VEGFC,THBS1,EGFR,BIRC3                                                         |
| DEVELOPMENTAL GROWTH (GO:0048589)                                                                | 0.05256242 | 0.16986242 | TNC,SPRY2,SOX9,DCLK1                                                                                    |
| CELLULAR RESPONSE TO TYPE I INTERFERON (GO:0071357)                                              | 0.04745042 | 0.17008469 | ISG20,ISG15,OASL                                                                                        |
| POSITIVE REGULATION OF T CELL PROLIFERATION (GO:0042102)                                         | 0.04839911 | 0.17011103 | CD274,IL6,CCL5                                                                                          |
| STEM CELL DEVELOPMENT (GO:0048864)                                                               | 0.0405694  | 0.17029867 | EDN1,JAG1,BCL2,SNAI2,SOX9                                                                               |
| TOLL-LIKE RECEPTOR 10 SIGNALING PATHWAY (GO:0034166)                                             | 0.04978355 | 0.1704176  | DUSP4,JUN,IRAK2,DUSP6                                                                                   |
| REGULATION OF G1_S TRANSITION OF MITOTIC CELL CYCLE (GO:2000045)                                 | 0.04878049 | 0.17054307 | CUL4A,PID1,CCND1,CYP1A1,BCL2,ZNF655,GIGYF2,DACT1                                                        |
| TYPE I INTERFERON SIGNALING PATHWAY (GO:0060337)                                                 | 0.03971631 | 0.17056389 | ISG20,ISG15,OASL                                                                                        |
| NUCLEOTIDE-BINDING DOMAIN LEUCINE RICH REPEAT CONTAINING RECEPTOR SIGNALING PATHWAY (GO:0035872) | 0.05479452 | 0.17057422 | IRAK2,BCL2,TXNIP,TNFAIP3,BCL2L1                                                                         |
| NEGATIVE REGULATION OF CELL CYCLE PHASE TRANSITION (GO:1901988)                                  | 0.05917553 | 0.1706547  | CCND1,BCL2,ZNF655,GIGYF2,MAD1L1,DACT1,IER3,BCL2L1                                                       |
| STEROID METABOLIC PROCESS (GO:0008202)                                                           | 0.04562453 | 0.17071578 | ABCA1,ACOX2,SLCO1B3,CYP1A1,DHRS2                                                                        |
| REGULATION OF CYTOKINE SECRETION (GO:0050707)                                                    | 0.04459562 | 0.17083833 | CD274,IL6,SAA1,TNFRSF21                                                                                 |
| POSITIVE REGULATION OF NITRIC OXIDE BIOSYNTHETIC PROCESS (GO:0045429)                            | 0.05532213 | 0.1710209  | IL6,EDN1,PTX3                                                                                           |
| SIGNALING BY NOTCH_HOMO SAPIENS_R-HSA-157118                                                     | 0.0608365  | 0.1711638  | JUN,TLE1,JAG1,CCND1,AGO2,MAML3,DTX4,HDAC9                                                               |
| NEGATIVE REGULATION OF MITOTIC CELL CYCLE PHASE TRANSITION (GO:1901991)                          | 0.06466667 | 0.17157277 | CCND1,BCL2,ZNF655,GIGYF2,MAD1L1,DACT1,IER3,BCL2L1                                                       |
| OSTEOBLAST DIFFERENTIATION (GO:0001649)                                                          | 0.05344494 | 0.17170724 | RSL1D1,SYNCRIP,BMP2,TNC,FHL2,SNAI2,RUNX2,CYR61,EPHA2                                                    |
| RESPONSE TO HEXOSE (GO:0009746)                                                                  | 0.04232425 | 0.17197302 | TXNIP,IRS2,THBS1                                                                                        |
| TOLL-LIKE RECEPTOR TLR6:TLR2 SIGNALING PATHWAY (GO:0038124)                                      | 0.04646176 | 0.17216    | DUSP4,JUN,IRAK2,DUSP6                                                                                   |
| TOLL-LIKE RECEPTOR 9 SIGNALING PATHWAY (GO:0034162)                                              | 0.04454023 | 0.17243175 | DUSP4,JUN,IRAK2,DUSP6                                                                                   |
| REGULATION OF NITRIC OXIDE BIOSYNTHETIC PROCESS (GO:0045428)                                     | 0.05156038 | 0.1724514  | IL6,EDN1,PTX3                                                                                           |
| CYTOKINE-MEDIATED SIGNALING PATHWAY (GO:0019221)                                                 | 0.05670971 | 0.1727706  | ISG20,IL6,CXCL11,CCL5,ISG15,IL7R,OASL                                                                   |
| RHEUMATOID ARTHRITIS_HOMO SAPIENS_HSA05323                                                       | 0.05184659 | 0.17412148 | IL6,JUN,CXCL8,CCL5                                                                                      |
| REGULATION OF CYSTEINE-TYPE ENDOPEPTIDASE ACTIVITY (GO:2000116)                                  | 0.05393401 | 0.17414275 | IL6,BCL10,THBS1,F3,BIRC3                                                                                |
| TOLL-LIKE RECEPTOR 5 SIGNALING PATHWAY (GO:0034146)                                              | 0.04625088 | 0.17430152 | DUSP4,JUN,IRAK2,DUSP6                                                                                   |
| REGULATION OF ANOIKIS (GO:2000209)                                                               | 0.04464286 | 0.17443053 | TLE1,BCL2,SNAI2,BCL2L1,MCL1                                                                             |
| NEGATIVE REGULATION OF ANOIKIS (GO:2000811)                                                      | 0.05510052 | 0.17443891 | TLE1,BCL2,SNAI2,BCL2L1,MCL1                                                                             |
| CELLULAR METAL ION HOMEOSTASIS (GO:0006875)                                                      | 0.05142503 | 0.17471069 | INPP4B,RYR2,EDN1,CCL5,DDIT3,STC2,PRKCE,SAA1,BCL2,TGM2                                                   |
| WNT SIGNALING PATHWAY_HOMO SAPIENS_P00057                                                        | 0.06050956 | 0.17494428 | EDN1,PLCB4,TLE1,PCDH9,CCND1,GNG4,PRKCE,CDH13,DACT1                                                      |
| MORPHOGENESIS OF A BRANCHING EPITHELIUM (GO:0061138)                                             | 0.0627666  | 0.17631757 | ACVR1,NRP1,EDN1,PDGFB,FGF2,IL6,BMP2,BCL2,RSP03,SOX9,SLIT2,EPHA2,TGM2                                    |
| REGULATION OF CELLULAR RESPONSE TO STRESS (GO:0080135)                                           | 0.05736783 | 0.17649291 | EDN1,TGFB2,GPR37,GADD45A,EGFR,NPAS2,SH3RF3,CUL4A,SPRED2,RSL1D1,BMP2,SNAI2,PMAIP1,DACT1,IER3,BCL2L1,MCL1 |
| REGULATION OF CELL-MATRIX ADHESION (GO:0001952)                                                  | 0.05274412 | 0.17652763 | BCL6,BCL2,VEGFC,CDH13,THBS1                                                                             |
| REGULATION OF RESPONSE TO DNA DAMAGE STIMULUS (GO:2001020)                                       | 0.06482064 | 0.17654446 | CUL4A,SPRED2,SNAI2,PMAIP1,EGFR,NPAS2,IER3,BCL2L1,MCL1                                                   |
| POSTTRANSCRIPTIONAL REGULATION OF GENE EXPRESSION (GO:0010608)                                   | 0.06655093 | 0.17670701 | IL6,CCL5,AGO2,ENC1,THBS1,GIGYF2,DACT1                                                                   |

|                                                                                       |            |            |                                                                                                    |
|---------------------------------------------------------------------------------------|------------|------------|----------------------------------------------------------------------------------------------------|
| DEFENSE RESPONSE TO VIRUS (GO:0051607)                                                | 0.05882353 | 0.17671134 | ISG20,IL6,BCL2,PMAIP1,ISG15,ADARB1,GBP1,OASL,IFIT2                                                 |
| REGULATION OF PRODUCTION OF MOLECULAR MEDIATOR OF IMMUNE RESPONSE (GO:0002700)        | 0.04806992 | 0.17695221 | IL6,BCL6,BCL10                                                                                     |
| TOLL-LIKE RECEPTOR TLR1:TLR2 SIGNALING PATHWAY (GO:0038123)                           | 0.05961675 | 0.17731333 | DUSP4,JUN,IRAK2,DUSP6                                                                              |
| TCF DEPENDENT SIGNALING IN RESPONSE TO WNT_HOMO SAPIENS_R-HSA-201681                  | 0.05160858 | 0.17743568 | TLE1,RSPO3,SOX9,DKK1,DACT1                                                                         |
| REGULATION OF FIBROBLAST GROWTH FACTOR RECEPTOR SIGNALING PATHWAY (GO:0040036)        | 0.05155367 | 0.17752923 | SPRY2,THBS1,DUSP6                                                                                  |
| POSITIVE REGULATION OF PROTEIN CATABOLIC PROCESS (GO:0045732)                         | 0.05737158 | 0.17844623 | ZFAND2A,TNFAIP3,SOX9,DACT1,IER3                                                                    |
| WNT SIGNALING PATHWAY (GO:0016055)                                                    | 0.06003639 | 0.17898339 | RYR2,TLE1,CCND1,DDIT3,RSPO3,SNAI2,DKK1,DACT1                                                       |
| RESPONSE TO BACTERIUM (GO:0009617)                                                    | 0.05506608 | 0.18000452 | IL6,ISG15                                                                                          |
| REGULATION OF CARBOHYDRATE METABOLIC PROCESS (GO:0006109)                             | 0.05666452 | 0.18009026 | IL6,IRS1,IRS2,IER3                                                                                 |
| POSITIVE REGULATION OF T CELL DIFFERENTIATION (GO:0045582)                            | 0.04988995 | 0.1801531  | IL6,IL7R                                                                                           |
| PI3K EVENTS IN ERBB4 SIGNALING_HOMO SAPIENS_R-HSA-1250342                             | 0.05401845 | 0.1801881  | IRS1,AGO2,IRS2,IER3                                                                                |
| GASTRIN-CREB SIGNALLING PATHWAY VIA PKC AND MAPK_HOMO SAPIENS_R-HSA-881907            | 0.05818597 | 0.1802498  | DUSP4,GNGT1,SPRED2,EDN1,PLCB4,IRS1,SAA1,IRS2,DUSP6,MGLL                                            |
| REGULATION OF EXTRINSIC APOPTOTIC SIGNALING PATHWAY (GO:2001236)                      | 0.05518896 | 0.18028095 | ACVR1,TGFB2,TNFRSF12A,BCL2,TNFAIP3,SNAI2,PMAIP1,BCL10,SCG2,THBS1,BCL2L1,MCL1                       |
| POSITIVE REGULATION OF CELL CYCLE PROCESS (GO:0090068)                                | 0.05163043 | 0.1804912  | RAD51B,CUL4A,EDN1,CCND1,PRKCE,CYP1A1,GATA6                                                         |
| FOLATE METABOLISM_HOMO SAPIENS_WP176                                                  | 0.04640719 | 0.18053494 | ABCA1,IL6,SAA1,GART                                                                                |
| HEPATITIS B_HOMO SAPIENS_HSA05161                                                     | 0.06314433 | 0.18059407 | IFIH1,IL6,JUN,CXCL8,CCND1,DDX58,BCL2                                                               |
| BRAIN DEVELOPMENT (GO:0007420)                                                        | 0.0505618  | 0.18064277 | SRR,SPHK1,IRS2,HNMT,PTPRG                                                                          |
| PI-3K CASCADE:FGFR2_HOMO SAPIENS_R-HSA-5654695                                        | 0.06580733 | 0.18080635 | IRS1,AGO2,IRS2,IER3                                                                                |
| EMBRYO DEVELOPMENT (GO:0009790)                                                       | 0.06332757 | 0.18080808 | ACVR1,AKIRIN2,PTPRR,EDN1,TGFB2,TPM1,GATA6,KLF2,FOSL1,FLCN,BMP2,GJB3,MAFF,CYP1A1,SNAI2,SLIT2,BCL2L1 |
| EPITHELIUM DEVELOPMENT (GO:0060429)                                                   | 0.0620438  | 0.18088315 | ERRF1,BMP2,JAG1,LAMB3,GJB5,SNAI2,SOX9,DKK1,EGFR,EPHA2                                              |
| POSITIVE REGULATION OF TRANSLATION (GO:0045727)                                       | 0.05431755 | 0.18098208 | IL6,CCL5,SAMD4A,THBS1                                                                              |
| MESENCHYMAL CELL DEVELOPMENT (GO:0014031)                                             | 0.05498534 | 0.18116781 | EDN1,JAG1,BCL2,SNAI2,SOX9                                                                          |
| REGULATION OF CALCIUM ION TRANSPORT (GO:0051924)                                      | 0.0551543  | 0.18120417 | RYR2,CXCL11,SPINK1,UBASH3B,CCL5,STC2,BCL2,PTGS2                                                    |
| REGULATION OF T CELL ACTIVATION (GO:0050863)                                          | 0.05803299 | 0.18154158 | CD274,IL6,BCL6,CCL5,BCL10,IL7R                                                                     |
| SENESCENCE AND AUTOPHAGY IN CANCER_HOMO SAPIENS_WP615                                 | 0.05705329 | 0.18163383 | RSL1D1,IL6,JUN,BMP2,CXCL8,BCL2,THBS1                                                               |
| POSITIVE REGULATION OF ENDOTHELIAL CELL PROLIFERATION (GO:0001938)                    | 0.05710401 | 0.18188782 | NRP1,JUN,BMP2,PDGFB,CDH13,SCG2,F3,FGF2                                                             |
| REGULATION OF EXTRINSIC APOPTOTIC SIGNALING PATHWAY IN ABSENCE OF LIGAND (GO:2001239) | 0.04023845 | 0.1819397  | TGFB2,BCL2,SNAI2,BCL2L1,MCL1                                                                       |
| REGULATION OF PROTEIN LOCALIZATION TO NUCLEUS (GO:1900180)                            | 0.06688103 | 0.18196799 | IL6,DDX58,SPHK1,LIF,SNAI2,PTGS2,EGFR,DACT1                                                         |
| HOMEOSTASIS OF NUMBER OF CELLS (GO:0048872)                                           | 0.05060585 | 0.18204924 | BCL2,TNFAIP3,PMAIP1,IL7R,GIGYF2                                                                    |
| REGULATION OF B CELL ACTIVATION (GO:0050864)                                          | 0.0538262  | 0.18205807 | IL6,BCL6,BCL2,TNFAIP3,IRS2,TNFRSF21                                                                |
| PI-3K CASCADE:FGFR3_HOMO SAPIENS_R-HSA-5654710                                        | 0.06191117 | 0.18232019 | IRS1,AGO2,IRS2,IER3                                                                                |
| REGULATION OF TYPE I INTERFERON PRODUCTION (GO:0032479)                               | 0.05751015 | 0.1823886  | IFIH1,DDX58,TNFAIP3,ISG15,DTX4                                                                     |
| DEFENSE RESPONSE TO OTHER ORGANISM (GO:0098542)                                       | 0.0591133  | 0.18723206 | ISG20,IL6,ANXA3,BCL2,PMAIP1,ISG15,ADARB1,GBP1,OASL,IFIT2                                           |
| POSITIVE REGULATION OF REACTIVE OXYGEN SPECIES METABOLIC PROCESS (GO:2000379)         | 0.05551443 | 0.18757626 | PID1,GADD45A,THBS1,EGFR                                                                            |
| RESPONSE TO STARVATION (GO:0042594)                                                   | 0.05904059 | 0.18760653 | JUN,SPHK1,DDIT3,BCL2,PMAIP1                                                                        |
| REGULATION OF CELL DIVISION (GO:0051302)                                              | 0.05469235 | 0.18760678 | FLCN,EDN1,TGFB2,PRKCE,PDGFC,LIF,PDGFB,TXNIP,VEGFC,HORMAD1,FGF2,MAD1L1                              |
| GAB1 SIGNALOSOME_HOMO SAPIENS_R-HSA-180292                                            | 0.06233244 | 0.18761477 | IRS1,AGO2,IRS2,IER3                                                                                |
| METAL ION HOMEOSTASIS (GO:0055065)                                                    | 0.0667071  | 0.1876567  | INPP4B,RYR2,EDN1,CCL5,DDIT3,STC2,PRKCE,SAA1,BCL2,EGFR,TGM2                                         |
| NEGATIVE REGULATION OF RAS PROTEIN SIGNAL TRANSDUCTION (GO:0046580)                   | 0.05833957 | 0.18776582 | BCL6,SPRY2                                                                                         |
| POSITIVE REGULATION OF OSTEOBLAST DIFFERENTIATION (GO:0045669)                        | 0.07868383 | 0.19036266 | ACVR1,IL6,BMP2,JAG1,RUNX2,CYR61                                                                    |
| MYOMETRIAL RELAXATION AND CONTRACTION PATHWAYS_HOMO SAPIENS_WP289                     | 0.06662665 | 0.19136508 | GNGT1,RGS17,RYR2,IL6,JUN,GNG4,PRKCE,MAFF,RGS20,RGS7                                                |
| OSSIFICATION (GO:0001503)                                                             | 0.0573711  | 0.19305442 | COL13A1,BCL2,SOX9,EGFR,RUNX2                                                                       |
| PIP3 ACTIVATES AKT SIGNALING_HOMO SAPIENS_R-HSA-1257604                               | 0.0634501  | 0.19413638 | IRS1,AGO2,IRS2,IER3                                                                                |

|                                                                                                                   |            |            |                                                                              |
|-------------------------------------------------------------------------------------------------------------------|------------|------------|------------------------------------------------------------------------------|
| PI-3K CASCADE:FGFR4_HOMO SAPIENS_R-HSA-5654720                                                                    | 0.05737158 | 0.19432934 | IRS1,AGO2,IRS2,IER3                                                          |
| REGULATION OF VASCULATURE DEVELOPMENT (GO:1901342)                                                                | 0.06760729 | 0.19448404 | IL6,TNFRSF12A,ANXA3,SPHK1,GATA6,VEGFC,TNFAIP3,PTGS2,THBS1,F3,HDAC9,EPHA2     |
| ROLE OF LAT2_NTAL_LAB ON CALCIUM MOBILIZATION_HOMO SAPIENS_R-HSA-2730905                                          | 0.06233244 | 0.1945235  | IRS1,AGO2,IRS2,IER3                                                          |
| KERATINOCYTE DIFFERENTIATION_HOMO SAPIENS_H_KERATINOCYTEPATHWAY                                                   | 0.05635838 | 0.19481778 | JUN,PRKCE,BCL2,EGFR,BIRC3                                                    |
| IL2-MEDIATED SIGNALING EVENTS_HOMO SAPIENS_A2A1883C-6193-11E5-8AC5-06603EB7F303                                   | 0.05229227 | 0.19481862 | JUN,IRS1,PRKCE,BCL2,IRS2                                                     |
| REGULATION OF SMOOTH MUSCLE CELL PROLIFERATION (GO:0048660)                                                       | 0.06953846 | 0.19521652 | IL6,EDN1,JUN,CCL5,TNFAIP3,CDH13,EGFR,TGM2                                    |
| EMBRYO DEVELOPMENT ENDING IN BIRTH OR EGG HATCHING (GO:0009792)                                                   | 0.06978119 | 0.19595394 | FOSL1,PTPRR,EDN1,BMP2,GJB3,MAFF,TPM1,CYP1A1,GATA6,KLF2,BCL2L1                |
| TNF ALPHA SIGNALING PATHWAY_HOMO SAPIENS_WP231                                                                    | 0.07345808 | 0.19605312 | IL6,JUN,TNFAIP3,BIRC3,BCL2L1                                                 |
| POSITIVE REGULATION OF APOPTOTIC SIGNALING PATHWAY (GO:2001235)                                                   | 0.07367716 | 0.19843322 | TGFB2,TNFRSF12A,BCL2,PMAIP1,BCL10,THBS1,BCL2L1,MCL1                          |
| PI-3K CASCADE:FGFR1_HOMO SAPIENS_R-HSA-5654689                                                                    | 0.07588986 | 0.19954018 | IRS1,AGO2,IRS2,IER3                                                          |
| PI3K_AKT ACTIVATION_HOMO SAPIENS_R-HSA-198203                                                                     | 0.07124183 | 0.20127298 | IRS1,AGO2,IRS2,IER3                                                          |
| SELENIUM MICRONUTRIENT NETWORK_HOMO SAPIENS_WP15                                                                  | 0.07271418 | 0.20182845 | ABCA1,IL6,TXNRD2,SAA1,PTGS2                                                  |
| NITROGEN COMPOUND TRANSPORT (GO:0071705)                                                                          | 0.07816538 | 0.2028195  | ABCA1,SNAP25,IL6,EDN1,SLC35F3,SH3BP4                                         |
| PROTEIN FOLDING_HOMO SAPIENS_R-HSA-391251                                                                         | 0.07251909 | 0.2029478  | GNGT1,GNG4,SPHK1,KIFC3,SGS7                                                  |
| APOPTOSIS_HOMO SAPIENS_WP254                                                                                      | 0.06176853 | 0.20421074 | JUN,CASP4,BCL2,PMAIP1,TNFRSF21,BIRC3,BCL2L1,MCL1                             |
| POSITIVE REGULATION OF CELL CYCLE (GO:0045787)                                                                    | 0.07620818 | 0.20438285 | FOSL1,RAD51B,CUL4A,EDN1,TGFB2,CCND1,SPHK1,PRKCE,CYP1A1,GATA6,EGFR            |
| AXON GUIDANCE_HOMO SAPIENS_R-HSA-422475                                                                           | 0.07790055 | 0.20444283 | DUSP4,SPRED2,IRS1,NTN4,IRS2,DUSP6,EPHA2                                      |
| CELLULAR RESPONSE TO EXTRACELLULAR STIMULUS (GO:0031668)                                                          | 0.07016394 | 0.2052456  | FOSL1,JUN,SPHK1,TNC,BCL2,PMAIP1                                              |
| STABILIZATION AND EXPANSION OF THE E-CADHERIN ADHERENS JUNCTION_HOMO SAPIENS_F1A6CD94-6195-11E5-8AC5-06603EB7F303 | 0.06545454 | 0.20532356 | ENAH,STX4,KIFC3,EGFR,EPHA2                                                   |
| CHAPERONIN-MEDIATED PROTEIN FOLDING_HOMO SAPIENS_R-HSA-390466                                                     | 0.07071483 | 0.2059546  | GNGT1,GNG4,SPHK1,KIFC3,SGS7                                                  |
| CANONICAL WNT SIGNALING PATHWAY (GO:0060070)                                                                      | 0.06271777 | 0.20635484 | RYR2,CCND1,RPO3,SNAI2                                                        |
| POSITIVE REGULATION OF NF-KAPPAB TRANSCRIPTION FACTOR ACTIVITY (GO:0051092)                                       | 0.0602649  | 0.20712556 | IL6,IRAK2,SPHK1,BCL10                                                        |
| BLOOD VESSEL REMODELING (GO:0001974)                                                                              | 0.06306306 | 0.20738791 | TGFB2,JAG1,LIF,HOXA3,TGM2                                                    |
| CELL GROWTH (GO:0016049)                                                                                          | 0.07799619 | 0.20769049 | IL6,EDN1,SOX9,IL7R,DCLK1                                                     |
| MUSCLE STRUCTURE DEVELOPMENT (GO:0061061)                                                                         | 0.06681351 | 0.21043625 | IFRD1,ETV1                                                                   |
| SMALL CELL LUNG CANCER_HOMO SAPIENS_HSA05222                                                                      | 0.09250507 | 0.2112614  | LAMB3,CCND1,ITGA2,BCL2,FN1,PTGS2,BIRC3,BCL2L1                                |
| REGULATION OF BLOOD PRESSURE (GO:0008217)                                                                         | 0.07212622 | 0.211262   | EDN1,VEGFC,IER3                                                              |
| NEGATIVE REGULATION OF TRANSLATION (GO:0017148)                                                                   | 0.07198306 | 0.21129848 | SYNCRIP,AGO2,ENC1,SAMD4A,GIGYF2                                              |
| CALCIUM REGULATION IN THE CARDIAC CELL_HOMO SAPIENS_WP536                                                         | 0.08219178 | 0.2125747  | GNGT1,SGS17,RYR2,GJB3,GNG4,PRKCE,GJB5,SGS20,SGS7                             |
| EPIDERMIS DEVELOPMENT (GO:0008544)                                                                                | 0.07112676 | 0.21557052 | TGFB2,LAMB3,GJB5,SOX9,DKK1,EGFR                                              |
| NEGATIVE REGULATION OF EPITHELIAL CELL MIGRATION (GO:0010633)                                                     | 0.07648725 | 0.21622181 | PTPRR,THBS1,PTPRG                                                            |
| PATHWAYS IN CANCER_HOMO SAPIENS_HSA05200                                                                          | 0.08264004 | 0.21927792 | JUN,CXCL8,LAMB3,VEGFC,EGFR,GNGT1,IL6,BMP2,PLCB4,CCND1,GNG4,BCL2,BIRC3,BCL2L1 |
| POSITIVE REGULATION OF LYMPHOCYTE DIFFERENTIATION (GO:0045621)                                                    | 0.08117565 | 0.22109841 | IL6,IL7R                                                                     |
| RESPONSE TO RETINOIC ACID (GO:0032526)                                                                            | 0.08067665 | 0.22163706 | ABCA1,TNC,SOX9,DKK1                                                          |
| POSITIVE REGULATION OF ENDOTHELIAL CELL MIGRATION (GO:0010595)                                                    | 0.08500669 | 0.22265644 | NRP1,EDN1,ANXA3,PDGFB,VEGFC,PTGS2,THBS1,HDAC9,FGF2                           |
| EPIDERMAL GROWTH FACTOR RECEPTOR SIGNALING PATHWAY (GO:0007173)                                                   | 0.08404908 | 0.22356027 | IRS1,AGO2,SPRY2,IRS2,SOX9                                                    |
| SPHINGOLIPID SIGNALING PATHWAY_HOMO SAPIENS_HSA04071                                                              | 0.0754717  | 0.22443059 | PLCB4,SPHK1,PRKCE,PPP2R2D,BCL2                                               |
| ORGANIC HYDROXY COMPOUND METABOLIC PROCESS (GO:1901615)                                                           | 0.07582349 | 0.22469665 | ABCA1,INPP4B,TGFB2,PLCB4,GPR37,ACOX2,SPHK1,SLCO1B3,CYP1A1,BCL2               |
| AMOEBIASIS_HOMO SAPIENS_HSA05146                                                                                  | 0.0804829  | 0.22475287 | SERPINB3,IL6,CXCL8,PLCB4,LAMB3                                               |
| CELLULAR RESPONSE TO NUTRIENT LEVELS (GO:0031669)                                                                 | 0.08811189 | 0.22557797 | JUN,SPHK1,TNC,BCL2,PMAIP1                                                    |
| POSITIVE REGULATION OF LIPID METABOLIC PROCESS (GO:0045834)                                                       | 0.08161866 | 0.22623818 | IRS1,PRKCE,PDGFB,IRS2,PTGS2,FGF2,CYR61                                       |
| NEGATIVE REGULATION OF IMMUNE SYSTEM PROCESS (GO:0002683)                                                         | 0.10034803 | 0.2273377  | INPP4B,CD274,MAFB,BCL6,TNFAIP3,SOX9,BCL10,IL7R,THBS1,TNFRSF21                |
| FATTY ACID DERIVATIVE METABOLIC PROCESS (GO:1901568)                                                              | 0.09252406 | 0.22921039 | EDN1,SPHK1,CYP1A1,PTGS2,MGLL                                                 |

|                                                                                      |            |            |                                                                                  |
|--------------------------------------------------------------------------------------|------------|------------|----------------------------------------------------------------------------------|
| APOPTOSIS SIGNALING PATHWAY_HOMO SAPIENS_P00006                                      | 0.08695652 | 0.230252   | JUN,PRKCE,BCL2,BIRC3,BCL2L1,RELB,MCL1                                            |
| RESPONSE TO AMINO ACID (GO:0043200)                                                  | 0.08298755 | 0.23028962 | IL6,EDN1,PDGFC,SH3BP4,EGFR,BCL2L1                                                |
| POSITIVE REGULATION OF CYTOKINE PRODUCTION (GO:0001819)                              | 0.09462617 | 0.23032522 | IFIH1,CD274,IL6,DDX58,DDIT3,SAA1,BCL10,DTX4,THBS1                                |
| REGULATION OF CALCIUM ION TRANSPORT INTO CYTOSOL (GO:0010522)                        | 0.08563135 | 0.23041616 | RYR2,CXCL11,UBASH3B,BCL2                                                         |
| REGULATION OF MEMBRANE POTENTIAL (GO:0042391)                                        | 0.09108041 | 0.23044696 | RYR2,EDN1,JUN,PID1,BCL2,PMAIP1,NALCN,BCL2L1                                      |
| HAIR CYCLE PROCESS (GO:0022405)                                                      | 0.08701564 | 0.23047684 | FST,TMEM79,BCL2,SOX9,DKK1,EGFR                                                   |
| REGULATION OF MITOCHONDRION ORGANIZATION (GO:0010821)                                | 0.08465245 | 0.23070076 | PID1,INF2,BCL2,PMAIP1,IER3,BCL2L1                                                |
| RESPONSE TO MONOSACCHARIDE (GO:0034284)                                              | 0.08281998 | 0.23071659 | TXNIP,IRS2,THBS1                                                                 |
| MOLTING CYCLE PROCESS (GO:0022404)                                                   | 0.08835341 | 0.23162687 | FST,TMEM79,BCL2,SOX9,DKK1,EGFR                                                   |
| SIGNALING BY THE B CELL RECEPTOR (BCR)_HOMO SAPIENS_R-HSA-983705                     | 0.08868895 | 0.23339921 | IRS1,AGO2,IRS2,BCL10,IER3                                                        |
| NEGATIVE REGULATION OF SECRETION BY CELL (GO:1903531)                                | 0.09134287 | 0.23459958 | IL6,EDN1,IRS1                                                                    |
| POSITIVE REGULATION OF ERK1 AND ERK2 CASCADE (GO:0070374)                            | 0.08635465 | 0.23473974 | IL6,SPRY2                                                                        |
| REGULATION OF RAS GTPASE ACTIVITY (GO:0032318)                                       | 0.10071514 | 0.23494364 | ERRF1,DOCK4,BCL6,SPRY2,EPHA2                                                     |
| FOCAL ADHESION_HOMO SAPIENS_HSA04510                                                 | 0.09090909 | 0.2349988  | JUN,LAMB3,ITGA2,TNC,FN1,PDGFB,VEGFC,THBS1,EGFR,CCND1,PDGFC,BCL2,MYL9,BIRC3       |
| PLATELET ACTIVATION (GO:0030168)                                                     | 0.1016731  | 0.23513596 | IL6,SAA1,VEGFC,STX4,THBS1,MGLL                                                   |
| REGULATION OF ENDOTHELIAL CELL PROLIFERATION (GO:0001936)                            | 0.09042905 | 0.23761246 | NRP1,JUN,BMP2,PDGFB,CDH13,SCG2,THBS1,F3,FGF2                                     |
| PANCREATIC SECRETION_HOMO SAPIENS_HSA04972                                           | 0.08422665 | 0.23932806 | CPA3,RYR2,PLCB4,RAB27B                                                           |
| REGULATION OF PEPTIDE TRANSPORT (GO:0090087)                                         | 0.09389067 | 0.24230587 | SNAP25,PCSK1,IRS1,SPHK1,CCL5,PRKCE,IRS2,PTGS2                                    |
| FATTY ACID BIOSYNTHETIC PROCESS (GO:0006633)                                         | 0.09723208 | 0.24232142 | EDN1,ELOVL2,LIAS,PTGS2,PRKAB1,MGLL                                               |
| NEGATIVE REGULATION OF SMALL GTPASE MEDIATED SIGNAL TRANSDUCTION (GO:0051058)        | 0.09455588 | 0.2424259  | BCL6,SPRY2                                                                       |
| MULTICELLULAR ORGANISMAL DEVELOPMENT (GO:0007275)                                    | 0.09295612 | 0.24271227 | SPRED2,HHAT,RNF114,IFRD1,ENC1,EPHA2                                              |
| APOPTOTIC MITOCHONDRIAL CHANGES (GO:0008637)                                         | 0.10320285 | 0.24358886 | JUN,BCL2,PMAIP1,BCL2L1,IFIT2,MCL1                                                |
| SIGNALING EVENTS MEDIATED BY PTP1B_HOMO SAPIENS_BE498A9B-6195-11E5-8AC5-06603EB7F303 | 0.08382353 | 0.24534336 | IRS1,SPRY2                                                                       |
| LEUKOCYTE ACTIVATION (GO:0045321)                                                    | 0.09648127 | 0.24929076 | EDN1,JUN,CXCL8,ANXA3,PRKCE,DHRS2,ITFG2,HDAC9,RUNX2,RELB,MAFB,BCL6,CCL5,BCL2,IL7R |

Supplementary Table 3:  
Raw data of miRNA expression.

|     |                  | Group1      | Group1      | Group1      | Group1      | Group2      | Group2      | Group2      | Group2      | Group3      | Group3      | Group3      | Group3      |
|-----|------------------|-------------|-------------|-------------|-------------|-------------|-------------|-------------|-------------|-------------|-------------|-------------|-------------|
|     |                  | Input1      | Input2      | Input3      | Input4      | NclKD1      | NclKD2      | NclKD3      | NclKD4      | NclKD1      | NclKD2      | NclKD3      | NclKD4      |
| 897 | U83CDbox 001     | 67.44868746 | 68.77536607 | 62.76830045 | 47.81700113 | 153.6774529 | 146.5732831 | 142.903985  | 154.5223785 | 116.9900125 | 110.8808665 | 108.2782146 | 102.8762522 |
| 896 | U82 aj011568     | 40.89041809 | 37.79429426 | 22.81604858 | 10.74948736 | 44.78285728 | 5.378592967 | 18.01797825 | 9.164173956 | 22.70547518 | 19.64471836 | 19.88498746 | 9.416331498 |
| 895 | U8 001           | 39.24267485 | 37.13218104 | 32.88927544 | 16.2130234  | 28.326549   | 14.24731818 | 15.50281563 | 10.66794771 | 33.50839817 | 18.55319493 | 19.03913452 | 11.62687697 |
| 894 | U6 af452638      | 31.70166541 | 33.98272458 | 41.95341805 | 0.012344103 | 21.37422494 | 0.047265655 | 0.052740788 | 4.021322289 | 6.863982597 | 10.59720714 | 0.016877215 | 4.39236238  |
| 893 | U50 ab017710     | 462.6656508 | 508.1176141 | 532.2471537 | 480.9329029 | 729.7654124 | 777.179559  | 789.0404181 | 808.0141292 | 280.5302902 | 312.2453173 | 316.5141809 | 306.2849016 |
| 892 | U30 001          | 1734.074481 | 1978.197844 | 2059.092083 | 1660.269689 | 2251.230933 | 2146.568363 | 2122.627553 | 2258.406855 | 1547.480853 | 1603.292268 | 1541.452053 | 1435.295119 |
| 891 | U3 001           | 33.90944961 | 32.61367101 | 23.28490696 | 0.013104504 | 33.87618043 | 0.047785004 | 0.052513007 | 8.706495158 | 9.60735259  | 15.35623126 | 1.384967369 | 0.016150911 |
| 890 | U23 aj007015     | 36.63798641 | 35.84827636 | 28.75852463 | 12.50398964 | 107.6572678 | 81.7512292  | 90.62575979 | 87.13381167 | 41.15187256 | 44.8372359  | 37.46967308 | 24.30284011 |
| 889 | U22 001          | 60.84735362 | 54.44057917 | 43.77660585 | 27.52995803 | 68.03018793 | 45.95446069 | 34.32094726 | 31.43042535 | 46.12004213 | 50.98263474 | 40.99903485 | 33.54356262 |
| 888 | U20 86604696     | 33.78484267 | 31.03524902 | 24.02366368 | 0.014790833 | 26.6481993  | 0.048006962 | 0.048265828 | 0.040755085 | 17.65467269 | 11.70445534 | 5.953796554 | 0.014532577 |
| 887 | U18 ab061820     | 340.4752064 | 408.7397035 | 416.736612  | 336.848543  | 803.4266077 | 931.780624  | 866.0960386 | 930.4688024 | 491.0959518 | 546.6703951 | 517.2830278 | 434.3626019 |
| 886 | U14 001          | 185.6430706 | 291.4367121 | 264.067018  | 201.6487451 | 321.9690589 | 423.4282911 | 374.313511  | 369.8261322 | 109.7193821 | 139.0457031 | 123.976817  | 102.073198  |
| 885 | U13 001          | 213.4968931 | 261.0981565 | 245.1361252 | 192.8007769 | 504.6336697 | 523.4859223 | 501.699302  | 513.5423638 | 258.0825862 | 268.9971268 | 253.9400069 | 227.9339729 |
| 884 | U1 002           | 13908.5085  | 15052.77699 | 15001.93752 | 13346.05126 | 22533.88289 | 19649.87804 | 18747.51971 | 22633.98732 | 14467.93963 | 13784.97379 | 13528.05241 | 13915.6092  |
| 883 | U1 001           | 4166.898011 | 4554.742227 | 4515.620852 | 3788.383849 | 5729.031092 | 5132.318279 | 4801.684543 | 5794.813868 | 2392.348208 | 2224.687531 | 2163.651464 | 2188.015547 |
| 882 | snRNA-U1-related | 35.72535506 | 30.19861771 | 24.40894188 | 8.801480834 | 67.21063911 | 48.47124647 | 49.23302103 | 56.1359924  | 54.39938223 | 55.81669909 | 49.44889548 | 34.98842067 |
| 881 | Rrna-320-300     | 39.24985058 | 30.3818648  | 25.66877286 | 11.03274373 | 63.57748337 | 31.95479985 | 45.82196953 | 41.20639442 | 36.53104157 | 39.55380732 | 34.48178819 | 30.70533102 |
| 880 | Rrna-21-1        | 41.54147053 | 37.88115113 | 38.20112513 | 20.98225694 | 49.88885662 | 27.47454969 | 23.32881823 | 32.75376301 | 27.40965591 | 26.56633761 | 21.7247067  | 13.31826711 |
| 879 | Rrna-123-103     | 48.17917045 | 46.67770123 | 35.75524113 | 17.38778009 | 37.91264522 | 48.20073006 | 38.42036925 | 36.6871173  | 51.79987222 | 35.48841056 | 41.84120046 | 34.45599449 |
| 878 | hsa-miR-99b*     | 6.551983262 | 0.011562238 | 20.19991317 | 35.0591933  | 18.86614422 | 18.32106602 | 28.55661335 | 25.88304276 | 27.28547445 | 28.96691143 | 33.46083341 | 20.11974568 |
| 877 | hsa-miR-99b      | 178.788894  | 211.602309  | 221.5306672 | 176.7766824 | 728.574133  | 728.680065  | 722.0518488 | 756.2724934 | 778.85314   | 791.0343003 | 760.8939891 | 757.3019659 |
| 875 | hsa-miR-99a      | 151.8854014 | 168.4611027 | 199.2576647 | 127.4614304 | 270.4247373 | 274.976437  | 329.1559089 | 202.4106256 | 246.8828832 | 291.8886025 | 275.1036816 | 240.4176894 |
| 874 | hsa-miR-98       | 412.8585932 | 427.3364367 | 376.8729345 | 354.030645  | 624.1102178 | 1293.088265 | 640.294531  | 452.7842093 | 542.7629501 | 1137.224043 | 590.9053082 | 456.5914795 |
| 872 | hsa-miR-96       | 244.4506888 | 458.2594029 | 376.3985906 | 347.4792714 | 24.69178684 | 2.493961387 | 21.37372511 | 0.043430505 | 22.13953766 | 23.20513394 | 16.53397378 | 44.76029616 |
| 871 | hsa-miR-95       | 9.683329146 | 26.32993836 | 44.72375078 | 17.75642741 | 21.39274074 | 3.272935348 | 20.91512452 | 4.044696367 | 20.6905686  | 28.94825673 | 16.94547009 | 24.50526131 |
| 870 | hsa-miR-944      | 3.289080492 | 13.1230805  | 43.45016901 | 6.551294975 | 0.042586546 | 8.582852466 | 4.229939464 | 0.445542439 | 17.88755093 | 10.29260568 | 15.67302233 | 14.43792186 |
| 869 | hsa-miR-943      | 0.212497513 | 21.23364552 | 33.93399666 | 14.97017598 | 8.617329609 | 16.26035365 | 27.99350435 | 17.58162685 | 42.23072391 | 18.44952332 | 32.45695978 | 34.26193168 |
| 868 | hsa-miR-942      | 0.011878864 | 15.44542622 | 34.93686709 | 11.81139913 | 6.634691177 | 14.35969447 | 19.47499448 | 0.03922043  | 21.72672625 | 8.830187739 | 18.53856919 | 15.06358489 |
| 867 | hsa-miR-941      | 2.504759929 | 19.60164109 | 35.91910874 | 9.204219993 | 5.4383149   | 20.71155983 | 30.4955712  | 8.222080919 | 39.71224486 | 23.31717377 | 27.06733418 | 43.7300851  |
| 866 | hsa-miR-940      | 70.19517117 | 95.66255008 | 116.7326775 | 104.888993  | 148.9552114 | 153.8635859 | 152.3593719 | 156.3849176 | 356.9367509 | 332.11338   | 317.152653  | 346.7281728 |
| 865 | hsa-miR-939      | 69.25852833 | 93.75880077 | 107.157365  | 86.81542895 | 92.64333551 | 85.91686718 | 86.49790359 | 62.77531348 | 146.2397394 | 118.1042339 | 125.371239  | 125.05908   |
| 863 | hsa-miR-937      | 0.011455707 | 17.47674511 | 41.57107685 | 20.21625434 | 24.07379003 | 30.09093245 | 27.56770512 | 23.21080691 | 25.77451288 | 20.96405333 | 35.36317639 | 46.63312133 |
| 862 | hsa-miR-936      | 230.7049885 | 209.8173624 | 203.0961184 | 223.6155524 | 37.42037481 | 32.23978012 | 43.92309188 | 30.45281519 | 72.0347233  | 61.3058881  | 67.25191543 | 73.18934467 |
| 861 | hsa-miR-935      | 0.011348264 | 14.46380776 | 32.81536918 | 9.32727446  | 27.79639243 | 29.43532655 | 30.64290443 | 19.68517978 | 28.18072245 | 31.01260006 | 29.80823832 | 58.75404022 |
| 860 | hsa-miR-934      | 0.01170183  | 19.42604051 | 39.05821565 | 16.51609997 | 20.7669025  | 23.422883   | 33.05740186 | 20.64373065 | 14.99052674 | 27.31181801 | 29.44587894 | 66.19140533 |
| 859 | hsa-miR-933      | 32.56211336 | 37.97842325 | 69.42352733 | 49.24957672 | 50.39253675 | 71.24311793 | 58.62070191 | 50.06314844 | 85.3748592  | 86.81992656 | 101.3040383 | 129.2869216 |
| 858 | hsa-miR-93*      | 6.267614474 | 28.11188087 | 42.45959585 | 21.16843494 | 26.46835398 | 31.07165615 | 36.89813388 | 30.24208454 | 0.360829853 | 34.57269196 | 40.55224125 | 56.05565137 |
| 857 | hsa-miR-93       | 291.8094358 | 382.253673  | 406.8245702 | 359.3033661 | 1031.645522 | 1115.603728 | 1114.784128 | 979.0647723 | 1004.665968 | 1126.715612 | 1086.425529 | 1057.381996 |
| 856 | hsa-miR-92b*     | 1.046198679 | 10.62719668 | 34.8933928  | 17.68551912 | 41.37099879 | 29.93176509 | 28.76913529 | 16.86724814 | 63.99962448 | 18.74087335 | 39.23258431 | 61.95702296 |
| 855 | hsa-miR-92b      | 1139.769608 | 1368.166811 | 1379.137777 | 1494.512595 | 1850.657678 | 1986.429096 | 1970.795799 | 2072.452491 | 1596.172271 | 1666.019151 | 1691.889703 | 1745.265521 |
| 854 | hsa-miR-92a-2*   | 0.015751071 | 7.777871331 | 39.01514093 | 20.62803487 | 27.34023243 | 22.29398217 | 14.27135202 | 5.151307256 | 41.81714138 | 26.8406664  | 28.37449682 | 32.85680877 |
| 853 | hsa-miR-92a-1*   | 9.179041229 | 27.15951354 | 43.05322536 | 28.71172601 | 162.3396718 | 123.4512538 | 151.5804343 | 112.453412  | 105.9819228 | 103.4033766 | 125.2592853 | 99.90187304 |
| 852 | hsa-miR-92a      | 3287.987071 | 4526.780338 | 4806.709438 | 4756.826627 | 6358.411202 | 7205.859615 | 7089.173874 | 7305.748984 | 5138.775293 | 6202.892126 | 6199.126342 | 6166.05447  |

|     |                |             |             |             |             |              |             |             |             |             |             |             |             |
|-----|----------------|-------------|-------------|-------------|-------------|--------------|-------------|-------------|-------------|-------------|-------------|-------------|-------------|
| 851 | hsa-miR-924    | 0.012520606 | 4.067282968 | 33.29717641 | 9.335563917 | 16.52344137  | 18.02969844 | 22.91451098 | 1.026576852 | 18.6829616  | 271.8107142 | 29.59666146 | 38.45654373 |
| 850 | hsa-miR-922    | 0.016503569 | 24.11432306 | 39.56528926 | 12.34380905 | 3.856190402  | 14.11150093 | 0.060579102 | 10.21874543 | 41.04110224 | 22.58863978 | 17.40360141 | 30.13188239 |
| 849 | hsa-miR-921    | 0.01556946  | 11.74317399 | 41.6211971  | 15.12844511 | 38.29718878  | 23.02904944 | 19.43449319 | 6.109019442 | 56.29980409 | 29.47604318 | 27.63571129 | 27.931255   |
| 848 | hsa-miR-920    | 0.015662952 | 7.800870735 | 32.80667238 | 16.21484898 | 26.67022085  | 23.50899704 | 21.5203559  | 21.77614858 | 69.71776368 | 33.83897881 | 23.98480032 | 39.09686498 |
| 847 | hsa-miR-9*     | 7.822919732 | 29.11500162 | 6.69379502  | 33.27645816 | 8.734802805  | 19.87570774 | 10.77816266 | 0.0427737   | 14.66877003 | 21.48737513 | 12.69814033 | 82.59249347 |
| 846 | hsa-miR-9      | 14.34686761 | 31.56641428 | 11.45095588 | 32.54766966 | 7.734966025  | 21.58965902 | 9.458234433 | 0.044293473 | 10.09314792 | 26.85482405 | 0.018392275 | 11.35028331 |
| 844 | hsa-miR-892a   | 13.3424009  | 32.4100327  | 5.435896086 | 31.50943544 | 21.5825      | 17.58301127 | 24.57486372 | 0.04420528  | 21.98827269 | 20.94038484 | 14.68889044 | 1.477021866 |
| 843 | hsa-miR-891b   | 4.032459013 | 28.23070204 | 0.116285406 | 33.11589905 | 6.967683569  | 12.42341897 | 12.78951068 | 0.049045198 | 18.05937069 | 1.268369019 | 10.272033   | 0.015902048 |
| 842 | hsa-miR-891a   | 11.07939871 | 41.51820931 | 20.7394402  | 46.49562888 | 26.23322591  | 31.48041108 | 29.37319433 | 4.546463807 | 45.83832718 | 17.52262446 | 27.9960267  | 10.91514764 |
| 841 | hsa-miR-890    | 11.34133306 | 33.03088137 | 8.938456603 | 42.17800847 | 14.63262733  | 19.06375347 | 15.165535   | 0.043264032 | 15.30095345 | 9.878768494 | 10.6316494  | 4.880557796 |
| 840 | hsa-miR-889    | 1.31744232  | 27.3079882  | 7.763476469 | 40.07537602 | 21.81353975  | 26.45329217 | 5.368516092 | 0.050038976 | 0.37942344  | 12.29365762 | 1.528467657 | 0.016147978 |
| 838 | hsa-miR-888    | 0.011974703 | 27.08721366 | 12.56124599 | 37.88579199 | 15.6143329   | 25.47100645 | 0.047198053 | 0.043743563 | 22.45608302 | 13.74483052 | 15.44985693 | 2.424163979 |
| 837 | hsa-miR-887    | 8.476022476 | 26.15539231 | 13.68775563 | 42.01395781 | 41.72562503  | 40.95689139 | 28.22646224 | 13.86030017 | 45.41990642 | 33.55644836 | 32.31724599 | 35.45314917 |
| 836 | hsa-miR-886-5p | 71.65904614 | 95.29648992 | 76.07889539 | 106.9108366 | 271.9328967  | 244.3926972 | 228.0538691 | 209.0630572 | 234.0415818 | 207.6337093 | 209.3783631 | 196.2659027 |
| 835 | hsa-miR-886-3p | 7.13304534  | 33.33190076 | 16.82854031 | 44.01574424 | 139.6722206  | 125.9100939 | 107.220831  | 107.1999994 | 122.8808514 | 87.55957161 | 91.01332908 | 85.75679084 |
| 834 | hsa-miR-885-5p | 19.54347768 | 25.2268194  | 11.47290381 | 49.8518257  | 42.48178066  | 39.57703922 | 34.30422608 | 22.11276946 | 31.49445448 | 36.02248663 | 23.53440475 | 29.80268509 |
| 833 | hsa-miR-885-3p | 10.38770668 | 27.86556985 | 17.87511523 | 43.64593922 | 30.44076936  | 35.40450226 | 9.745259729 | 13.8141005  | 41.58151031 | 19.82375061 | 21.0839707  | 15.3472024  |
| 832 | hsa-miR-877*   | 12.8849003  | 27.31209493 | 9.04859523  | 43.54376029 | 52.2067131   | 30.38446792 | 33.85227675 | 30.15360186 | 12.37138927 | 28.82288379 | 15.32896103 | 28.17695796 |
| 831 | hsa-miR-877    | 64.75174539 | 69.86834383 | 53.85716844 | 82.7588275  | 146.2831282  | 120.8524582 | 128.8390647 | 110.9777274 | 156.3097897 | 133.9522921 | 116.0460424 | 147.5485635 |
| 830 | hsa-miR-876-5p | 0.031486594 | 25.91015836 | 0.522671714 | 40.49189337 | 18.96272255  | 31.02266747 | 1.966289237 | 0.044942696 | 16.31755018 | 11.87206471 | 9.804918892 | 11.63681594 |
| 828 | hsa-miR-875-5p | 0.011575155 | 26.65826707 | 9.787052383 | 36.78169774 | 32.15901359  | 53.42382067 | 18.82521502 | 7.012691761 | 22.15785908 | 25.5380739  | 24.54065785 | 22.46790131 |
| 826 | hsa-miR-874    | 114.6578369 | 108.413765  | 107.8879474 | 123.2321477 | 145.82708202 | 51.21500338 | 42.43436873 | 35.13719763 | 58.44313846 | 44.938471   | 47.55629116 | 47.49270041 |
| 825 | hsa-miR-873    | 0.011996566 | 29.05295458 | 7.582594045 | 32.0525338  | 31.11290182  | 31.07567059 | 7.818293664 | 0.042828865 | 17.06915283 | 17.70289765 | 16.31609514 | 17.74270873 |
| 824 | hsa-miR-802    | 5.370042311 | 29.8820581  | 1.757112969 | 30.25091281 | 74.47272827  | 38.66426178 | 0.04932604  | 8.965431775 | 61.29769149 | 21.1818865  | 18.87268719 | 22.0526662  |
| 823 | hsa-miR-770-5p | 0.015389078 | 28.12328004 | 0.012193215 | 38.6523247  | 59.94090227  | 38.89439184 | 17.85106308 | 4.334015773 | 37.99291386 | 40.21432784 | 27.09125989 | 31.4084953  |
| 822 | hsa-miR-769-5p | 10.08351544 | 24.21218105 | 8.148916861 | 47.00315242 | 59.8223589   | 49.78143774 | 24.6133809  | 25.48699337 | 55.53404028 | 36.12262313 | 17.0542614  | 18.3965061  |
| 821 | hsa-miR-769-3p | 311.5669568 | 285.2586284 | 278.3323543 | 358.7014154 | 45.69404824  | 34.153993   | 25.27320999 | 0.053005155 | 90.80745186 | 57.95252887 | 32.91558234 | 27.82713678 |
| 820 | hsa-miR-767-5p | 0.01504981  | 30.59942833 | 12.86017564 | 36.72791211 | 125.385578   | 79.42091349 | 39.49175061 | 32.59048985 | 84.06642241 | 44.09294243 | 23.95640199 | 37.74434408 |
| 819 | hsa-miR-767-3p | 20.73795739 | 37.63698172 | 5.247750982 | 39.7009209  | 109.6590877  | 62.17053582 | 29.92563671 | 14.33195717 | 118.2142697 | 92.48741745 | 91.40795912 | 79.59936004 |
| 818 | hsa-miR-766    | 19.69133872 | 40.13043793 | 24.47685864 | 51.49091222 | 160.535089   | 113.8988076 | 112.4431537 | 87.86992746 | 50.00043313 | 44.12577063 | 32.5154585  | 0.016797915 |
| 817 | hsa-miR-765    | 245.1352723 | 206.2021554 | 312.1087682 | 362.9797893 | 44.34631871  | 36.81904547 | 27.38646369 | 1.344948157 | 62.64934845 | 51.32475807 | 42.10331714 | 16.98668612 |
| 816 | hsa-miR-760    | 23.33210159 | 9.448717905 | 42.37716698 | 55.18571032 | 45.51700837  | 41.73842055 | 24.40299443 | 11.37387609 | 33.16900937 | 33.19731716 | 8.318968961 | 5.772258024 |
| 815 | hsa-miR-758    | 21.92617687 | 0.013446921 | 34.33230427 | 58.42654183 | 40.9004884   | 27.4724341  | 8.418634112 | 0.042028115 | 62.45485013 | 53.12404392 | 37.82717443 | 20.54571259 |
| 814 | hsa-miR-744*   | 18.15833267 | 6.237708081 | 38.05372071 | 51.95790182 | 63.11750716  | 42.16977934 | 37.11717997 | 29.71052522 | 61.81129806 | 55.75296892 | 35.72975202 | 30.68882359 |
| 813 | hsa-miR-744    | 27.37582229 | 17.4318116  | 43.77027852 | 55.37069945 | 77.87265114  | 65.83778504 | 53.63526378 | 48.2016278  | 1305.360524 | 1364.552582 | 1278.219433 | 1267.626956 |
| 812 | hsa-miR-720    | 581.5618213 | 587.3813659 | 691.1782231 | 693.6262554 | 1689.743017  | 1701.348937 | 1532.619144 | 1514.017857 | 23.18265763 | 0.909649154 | 7.028128342 | 1.218682373 |
| 811 | hsa-miR-7-2*   | 21.80833333 | 0.013093738 | 30.76442204 | 50.97319625 | 38.47997944  | 23.22434918 | 7.000555521 | 3.831404995 | 116.606289  | 72.81808414 | 95.36386723 | 68.01361365 |
| 810 | hsa-miR-7-1*   | 40.81946312 | 20.78551548 | 50.8939037  | 53.05688558 | 117.5332464  | 119.600961  | 110.5502624 | 92.63942299 | 29.06634319 | 4.070387713 | 0.018930901 | 1.953099851 |
| 809 | hsa-miR-708*   | 18.19706417 | 0.012318341 | 39.662228   | 49.27061295 | 30.43216186  | 15.08326498 | 1.435551261 | 3.553267262 | 33.43614883 | 16.06354989 | 7.344746865 | 4.424872597 |
| 808 | hsa-miR-708    | 15.42753242 | 0.012018659 | 39.85755608 | 55.92792191 | 33.47968024  | 12.09734048 | 0.138121192 | 0.042073089 | 795.9577989 | 1662.063115 | 1628.995033 | 700.4695783 |
| 807 | hsa-miR-7      | 13.79156262 | 3.806838233 | 45.82404474 | 48.07716185 | 836.3932575  | 2424.374349 | 2226.871959 | 752.0395467 | 69.03784637 | 56.77399283 | 46.08978057 | 48.21302806 |
| 806 | hsa-miR-675*   | 26.08577064 | 0.433051818 | 29.68990719 | 47.5924566  | 77.7105311   | 45.41023034 | 58.04334581 | 50.21410317 | 35.65781745 | 5.660495882 | 17.36168397 | 19.07576173 |
| 805 | hsa-miR-675    | 27.5286901  | 0.532092128 | 40.11191059 | 49.60257784 | 37.76240321  | 17.83646613 | 21.75229789 | 11.69377689 | 180.7787104 | 107.9244134 | 125.8522276 | 121.9367606 |
| 804 | hsa-miR-671-5p | 342.7838453 | 300.8243898 | 344.2156412 | 379.3847022 | 116.3105965  | 102.5372092 | 94.8807658  | 72.30868403 | 53.8793016  | 9.873976055 | 29.87654303 | 39.19603689 |
| 803 | hsa-miR-671-3p | 36.12025516 | 1.053292541 | 37.71196947 | 50.09789613 | 56.70678164  | 35.04421516 | 30.76485509 | 25.51390041 | 91.2777475  | 53.86947655 | 68.68959686 | 68.30640022 |
| 802 | hsa-miR-668    | 25.15323831 | 3.339881255 | 37.76665542 | 48.928378   | 89.3400834   | 83.73183009 | 63.18026972 | 74.90358845 | 107.683068  | 95.25803825 | 105.1839305 | 107.3985684 |
| 801 | hsa-miR-665    | 34.68340689 | 9.842473796 | 43.64984695 | 51.53910063 | 47.62268137  | 31.49816581 | 33.92747326 | 27.3746039  | 13.21307408 | 1.931251662 | 12.37494044 | 18.76241101 |

|     |                |             |             |             |             |             |             |             |             |             |             |             |             |
|-----|----------------|-------------|-------------|-------------|-------------|-------------|-------------|-------------|-------------|-------------|-------------|-------------|-------------|
| 800 | hsa-miR-664*   | 23.01846502 | 0.012520325 | 35.31353957 | 51.45533446 | 46.42564817 | 13.2301744  | 16.18569659 | 30.00623918 | 27.48653925 | 22.46910113 | 21.55599471 | 31.88878557 |
| 799 | hsa-miR-664    | 24.01988704 | 3.856282906 | 40.63814035 | 52.56791824 | 48.95594681 | 24.80963306 | 19.23543753 | 36.62968467 | 53.04798664 | 18.48634029 | 40.56376382 | 41.0891367  |
| 798 | hsa-miR-663b   | 8.863540375 | 0.012107831 | 25.37740607 | 39.45838552 | 54.50247149 | 2.897163647 | 24.95402862 | 25.27686576 | 73.81556198 | 31.97261702 | 38.69585617 | 70.72633492 |
| 797 | hsa-miR-663    | 1195.718178 | 1278.071307 | 1585.384819 | 1366.911192 | 68.51270907 | 56.39942526 | 62.83413567 | 57.45232446 | 42.42799267 | 26.60171461 | 50.59162859 | 43.14754319 |
| 796 | hsa-miR-662    | 16.65040365 | 0.011358634 | 41.65886973 | 42.94022987 | 68.27639767 | 32.06280252 | 56.31986124 | 39.56343569 | 14.27226507 | 2.12317366  | 29.75921409 | 20.56093685 |
| 795 | hsa-miR-661    | 14.72298904 | 2.420914221 | 41.14590266 | 37.21952891 | 34.25681847 | 19.90935042 | 19.35561983 | 25.30561384 | 66.57518091 | 7.747955348 | 58.34885814 | 36.47169391 |
| 794 | hsa-miR-660    | 16.52923108 | 3.112991818 | 44.49567127 | 52.96770707 | 99.87692476 | 30.72399644 | 68.57363889 | 42.85120312 | 52.84287793 | 6.478546028 | 19.86405729 | 39.15115984 |
| 793 | hsa-miR-659    | 36.99826537 | 13.72188801 | 63.0662754  | 66.93388674 | 37.64629215 | 10.34353343 | 0.050206513 | 30.76278523 | 26.62577613 | 0.02003929  | 40.0285438  | 24.01894669 |
| 792 | hsa-miR-658    | 41.1707605  | 20.41289269 | 72.07663112 | 66.11434597 | 56.58855922 | 14.19001952 | 20.09999927 | 17.58746134 | 71.88469883 | 44.29602356 | 55.00214446 | 64.98861586 |
| 791 | hsa-miR-657    | 10.66460593 | 2.236425506 | 30.90270124 | 46.2690213  | 79.22438121 | 49.49604787 | 53.68614755 | 59.80926847 | 79.69061129 | 6.505417593 | 34.6307666  | 37.10110799 |
| 790 | hsa-miR-656    | 4.778613695 | 4.445693679 | 34.42856797 | 46.06474378 | 112.1215752 | 22.21666442 | 24.59240466 | 24.14935537 | 51.26386717 | 0.088401773 | 18.36173739 | 23.57586534 |
| 789 | hsa-miR-655    | 0.015587103 | 0.012695994 | 29.26768982 | 39.35597818 | 38.3032691  | 16.28503936 | 7.067876665 | 12.44505576 | 65.13370725 | 7.69091604  | 35.72081985 | 55.16440202 |
| 788 | hsa-miR-654-5p | 329.4941604 | 189.1979744 | 224.7746408 | 191.1941053 | 63.955834   | 19.57640804 | 0.051988821 | 21.23173204 | 19.198736   | 2.51263242  | 14.39935428 | 27.33595755 |
| 787 | hsa-miR-654-3p | 2.98627042  | 2.539601863 | 26.16260038 | 37.14301836 | 20.03895866 | 30.68936264 | 36.5714882  | 19.39930744 | 5.466039288 | 0.017178642 | 0.020283452 | 3.728472684 |
| 786 | hsa-miR-653    | 0.013011984 | 2.574715797 | 40.47875433 | 41.02235697 | 9.817297482 | 11.18591297 | 0.065493337 | 9.668395329 | 52.66689939 | 35.55595664 | 58.77665078 | 36.97851676 |
| 785 | hsa-miR-652    | 4.825998678 | 9.52270226  | 35.65649671 | 31.54726779 | 38.72508437 | 44.92603734 | 45.38685086 | 38.84751319 | 17.396506   | 9.947668754 | 8.199708702 | 27.40491186 |
| 784 | hsa-miR-650    | 6.506453267 | 7.805385156 | 28.31051749 | 70.89705909 | 21.1022288  | 8.198889762 | 17.52182196 | 10.84355281 | 4.445361049 | 0.018234135 | 8.509783313 | 1.363637703 |
| 783 | hsa-miR-649    | 0.338699658 | 3.334233618 | 29.88811033 | 32.70900054 | 7.094064414 | 16.5988287  | 19.78721964 | 2.85954729  | 19.87165747 | 14.10096071 | 39.09365995 | 21.68561511 |
| 780 | hsa-miR-647    | 0.011022189 | 2.832881521 | 27.59848947 | 31.26530607 | 39.50126164 | 41.62440249 | 45.81086794 | 46.25564538 | 47.67878907 | 48.93424463 | 65.53235931 | 63.10740469 |
| 779 | hsa-miR-646    | 0.011720589 | 27.36761271 | 34.69447044 | 19.0983651  | 22.88797464 | 20.8917673  | 23.93136122 | 3.623011439 | 14.37246445 | 28.97871148 | 23.18625347 | 791.0957845 |
| 778 | hsa-miR-645    | 2.239647299 | 28.60915812 | 28.96349781 | 32.70088514 | 11.35579142 | 15.880625   | 4.375529984 | 0.03825043  | 5.344236018 | 1.264364605 | 9.96745236  | 44.2385996  |
| 775 | hsa-miR-642    | 1.664061753 | 24.92799194 | 35.5052982  | 37.6806751  | 26.39919665 | 27.09687425 | 27.63941619 | 8.804723711 | 6.44822891  | 21.20802097 | 22.00399263 | 35.34608471 |
| 774 | hsa-miR-641    | 13.13793173 | 31.53810804 | 41.82969922 | 43.68969549 | 46.86904669 | 74.81530653 | 47.86530392 | 47.47048472 | 15.01898496 | 12.65759173 | 0.018230569 | 11.19253338 |
| 773 | hsa-miR-640    | 0.011653985 | 32.91832646 | 35.15575129 | 30.45543288 | 23.90126979 | 18.30815842 | 23.35493807 | 8.047778228 | 40.02356015 | 42.61202064 | 34.99360286 | 42.6531753  |
| 772 | hsa-miR-639    | 1.310889475 | 28.92447059 | 24.66557219 | 40.40788138 | 8.210455513 | 30.0397756  | 15.63947098 | 11.3221949  | 7.518149621 | 24.33040329 | 11.21083995 | 4.367443195 |
| 771 | hsa-miR-638    | 6907.690623 | 8940.755606 | 9397.015433 | 9124.074692 | 874.0369182 | 915.4639442 | 846.1210106 | 946.0351341 | 15.42769756 | 14.91615502 | 8.032266231 | 0.016671649 |
| 770 | hsa-miR-637    | 13.64907617 | 30.12952027 | 36.24579099 | 52.29896538 | 15.30074997 | 24.47937984 | 27.82288816 | 12.92585647 | 738.9310873 | 804.3193154 | 785.0826703 | 772.6977109 |
| 769 | hsa-miR-636    | 17.85328808 | 35.18658968 | 29.16473945 | 41.6333964  | 49.05261388 | 67.99378629 | 44.77452385 | 34.95389658 | 9.725304734 | 35.43635985 | 1.553300071 | 11.13841268 |
| 768 | hsa-miR-635    | 0.011986472 | 41.64244176 | 32.93787735 | 32.94322336 | 16.05581572 | 43.61790544 | 10.13817426 | 1126.362233 | 49.2377854  | 50.60288766 | 40.29238834 | 40.7872027  |
| 767 | hsa-miR-634    | 9.487355214 | 32.45198589 | 38.9743473  | 36.58919892 | 47.91126314 | 60.2206024  | 49.13762741 | 47.40285712 | 4.849034591 | 32.68519148 | 9.68320254  | 8.806241051 |
| 766 | hsa-miR-633    | 0.018068122 | 26.35002476 | 38.43877663 | 31.62442588 | 3.239036432 | 26.58170378 | 17.27902176 | 4.03441691  | 40.14962798 | 40.42217784 | 33.91258523 | 48.49274593 |
| 764 | hsa-miR-631    | 6.171159122 | 26.33159667 | 34.82595168 | 34.85726576 | 40.88351338 | 47.98709655 | 34.51527194 | 31.45456417 | 0.032932111 | 0.022266348 | 4.495189937 | 15.62887997 |
| 763 | hsa-miR-630    | 20.02561497 | 35.52637485 | 52.08250755 | 50.065015   | 1.738911559 | 44.25367706 | 12.49235029 | 20.64180657 | 27.91087099 | 25.16976242 | 37.22590041 | 43.75414935 |
| 762 | hsa-miR-629*   | 10.17828988 | 38.49292549 | 49.1945327  | 51.08868125 | 54.13935909 | 81.2045151  | 67.25214021 | 65.82409192 | 15.30337321 | 16.78433271 | 29.73639526 | 31.98571783 |
| 761 | hsa-miR-629    | 63.13510377 | 96.95441789 | 115.6153881 | 106.9629716 | 144.6674896 | 179.6287041 | 166.7405074 | 142.9026981 | 37.50116072 | 35.33483033 | 60.07520216 | 67.66559358 |
| 760 | hsa-miR-628-5p | 0.011967462 | 19.48381621 | 25.52272881 | 34.47862675 | 27.26085181 | 70.03269751 | 28.60576658 | 21.55058518 | 128.0540305 | 117.640717  | 122.044097  | 119.9667757 |
| 759 | hsa-miR-628-3p | 8.00509212  | 39.26637462 | 43.14251856 | 53.12563968 | 37.01919179 | 70.90049011 | 47.18376511 | 56.81817842 | 10.46162943 | 14.43802424 | 25.94194709 | 34.1400581  |
| 758 | hsa-miR-627    | 6.273172684 | 31.54375981 | 38.61882669 | 46.35987297 | 11.86093091 | 26.87016869 | 25.86209056 | 8.234408207 | 31.04905585 | 29.8044077  | 46.80695907 | 44.04548125 |
| 756 | hsa-miR-625*   | 17.72432911 | 25.47646113 | 33.83709582 | 40.71929097 | 30.55792484 | 58.93600466 | 47.22901124 | 36.92543823 | 25.98311821 | 3.308572894 | 27.65377972 | 31.83636196 |
| 755 | hsa-miR-625    | 10.41410344 | 33.68600681 | 30.50597621 | 56.39175109 | 24.04703367 | 36.35193087 | 36.50902963 | 21.99682101 | 62.16842332 | 56.78129808 | 47.87056248 | 59.93391043 |
| 753 | hsa-miR-624    | 0.0195008   | 11.4270772  | 22.19786627 | 25.81943034 | 0.099292453 | 36.93444963 | 9.957485602 | 5.54496767  | 22.21408691 | 20.89611656 | 30.63942998 | 26.91943458 |
| 752 | hsa-miR-623    | 6.134231749 | 32.02080746 | 32.0200832  | 42.81568918 | 36.62611233 | 31.08226595 | 31.87057421 | 19.03999474 | 36.46950224 | 6.04996737  | 16.53564242 | 14.04248075 |
| 751 | hsa-miR-622    | 0.013231689 | 20.82863039 | 22.36353707 | 27.10272938 | 19.02839402 | 41.66852947 | 29.42648402 | 24.10508599 | 40.63659919 | 31.38143024 | 38.83201686 | 42.48586341 |
| 750 | hsa-miR-621    | 0.016989506 | 16.81028669 | 27.64751044 | 22.77288753 | 42.50981303 | 26.96012133 | 22.55953036 | 10.90678847 | 21.34474219 | 38.55215366 | 26.45177396 | 31.51773352 |
| 749 | hsa-miR-620    | 10.07511606 | 13.79841152 | 32.55645574 | 39.87267916 | 17.26233388 | 15.03622446 | 0.403086733 | 0.042251162 | 19.31810721 | 25.0882675  | 7.330375555 | 86.08136841 |
| 748 | hsa-miR-619    | 11.28421896 | 17.1598215  | 28.85444176 | 51.34531129 | 43.56141812 | 27.18353622 | 22.66100819 | 0.047794999 | 11.12305091 | 34.5345953  | 4.820172079 | 0.015498811 |
| 747 | hsa-miR-618    | 15.09820779 | 16.75981297 | 26.54507116 | 55.04627752 | 23.78005843 | 9.598678319 | 5.662792869 | 0.049314617 | 1.36189695  | 18.36105339 | 4.784019323 | 0.015905829 |



|     |                |             |             |             |             |             |             |             |             |             |             |             |             |
|-----|----------------|-------------|-------------|-------------|-------------|-------------|-------------|-------------|-------------|-------------|-------------|-------------|-------------|
| 746 | hsa-miR-617    | 18.36887736 | 23.2875817  | 29.01991612 | 49.47656631 | 62.56203464 | 61.04511199 | 57.24632566 | 29.18124395 | 46.12510308 | 62.42743984 | 40.55147546 | 82.92738973 |
| 745 | hsa-miR-616*   | 8.03953516  | 20.08703115 | 21.84877575 | 44.18929993 | 47.37591499 | 23.42996706 | 18.37633349 | 11.14925038 | 17.4577894  | 18.23381507 | 7.53403726  | 104.0345073 |
| 744 | hsa-miR-616    | 5.800100882 | 19.03134011 | 22.34546198 | 53.17125449 | 31.81602614 | 31.24288231 | 20.4231933  | 0.040311836 | 29.60769285 | 25.9272244  | 22.82475714 | 82.17326163 |
| 743 | hsa-miR-615-5p | 14.50612449 | 24.53799515 | 28.11415351 | 49.09763987 | 33.83591882 | 37.76768285 | 23.52788805 | 3.78543337  | 32.572869   | 34.57200797 | 20.99205022 | 56.53742976 |
| 742 | hsa-miR-615-3p | 20.69282785 | 32.60994751 | 39.62695937 | 50.69597866 | 59.94294281 | 41.74347741 | 37.69010683 | 30.39157287 | 35.00322825 | 44.5553228  | 15.56015925 | 17.51101098 |
| 741 | hsa-miR-614    | 8.803455078 | 19.91635019 | 25.88179764 | 50.34209018 | 46.88669895 | 26.39560362 | 13.79822715 | 0.044598066 | 25.88978887 | 30.97701034 | 17.05891848 | 4.400020542 |
| 740 | hsa-miR-613    | 7.804369517 | 26.0121304  | 25.5300248  | 40.92634722 | 46.26598444 | 13.25163237 | 19.42823528 | 4.099656919 | 32.27683798 | 27.63057642 | 31.30592567 | 10.49758814 |
| 739 | hsa-miR-612    | 16.40101578 | 27.5336843  | 33.46358205 | 53.862248   | 28.423441   | 13.8894653  | 26.46103377 | 0.042899089 | 21.64974693 | 23.62331464 | 0.019585208 | 25.99655282 |
| 738 | hsa-miR-611    | 24.50535696 | 23.82366501 | 32.24989533 | 57.09595996 | 56.60266641 | 23.0442202  | 27.76570514 | 9.512271887 | 36.82683683 | 27.44287117 | 13.26253376 | 14.49109461 |
| 737 | hsa-miR-610    | 2.971501607 | 16.74879342 | 30.45997483 | 47.98611625 | 33.71935603 | 16.29413849 | 14.94772686 | 0.044468711 | 39.25001959 | 17.05196675 | 3.054297406 | 2.523301545 |
| 736 | hsa-miR-609    | 0.011609878 | 15.20538155 | 27.16213478 | 47.74240591 | 33.16622504 | 17.12814152 | 15.94195237 | 0.048380762 | 24.83223784 | 24.30563536 | 4.071073886 | 0.015669516 |
| 735 | hsa-miR-608    | 7.877563584 | 21.80659474 | 28.16078219 | 42.77474673 | 43.22555772 | 29.09300844 | 12.52299802 | 12.00054152 | 23.33018389 | 13.90987646 | 0.01818111  | 14.33185243 |
| 734 | hsa-miR-607    | 10.12338406 | 18.01072464 | 22.477085   | 44.26235124 | 27.35298796 | 21.76293085 | 13.04636509 | 0.052701817 | 24.49250113 | 0.245310355 | 0.01881087  | 0.016858814 |
| 733 | hsa-miR-606    | 0.012137287 | 22.22275925 | 26.38042444 | 47.91189619 | 25.95653566 | 24.01991223 | 4.902859066 | 0.051101036 | 17.08836588 | 0.018136549 | 0.239744822 | 1.348474816 |
| 732 | hsa-miR-605    | 36.24847253 | 55.85786708 | 60.59958234 | 69.25854764 | 84.97316283 | 73.65430603 | 77.75198871 | 65.58442149 | 312.3659416 | 320.9981384 | 285.8642355 | 345.1772516 |
| 731 | hsa-miR-604    | 8.972682059 | 18.38170409 | 19.69923086 | 46.86415535 | 37.34445942 | 18.52572317 | 15.24802273 | 19.35610439 | 29.91369288 | 19.09877307 | 10.86970086 | 14.46936499 |
| 730 | hsa-miR-603    | 1.935654748 | 18.82156097 | 18.04949352 | 46.66534314 | 40.89099838 | 30.12996706 | 28.18103138 | 2.757153197 | 22.11920047 | 0.364806581 | 0.021937785 | 0.023020377 |
| 729 | hsa-miR-602    | 42.94262537 | 43.23482303 | 48.51049844 | 78.29265403 | 64.23258018 | 46.20388707 | 32.46644527 | 27.30569735 | 51.93008718 | 38.43152239 | 37.53065846 | 39.16904076 |
| 728 | hsa-miR-601    | 39.955921   | 45.6166914  | 57.82152766 | 80.4179395  | 104.7280445 | 91.2414231  | 99.14613379 | 79.26329054 | 91.32124668 | 63.91777428 | 70.32920301 | 75.36453701 |
| 727 | hsa-miR-600    | 3.903967176 | 23.11329658 | 15.28337753 | 46.70302119 | 36.62454376 | 19.93570306 | 27.0980563  | 0.04744877  | 20.74322186 | 10.73298387 | 13.89768478 | 9.009316071 |
| 726 | hsa-miR-599    | 0.015361841 | 14.64053687 | 13.46733364 | 34.59071075 | 65.07560785 | 11.13825533 | 17.68961105 | 0.308025103 | 60.40805988 | 3.001873331 | 0.019980495 | 3.677789555 |
| 725 | hsa-miR-598    | 13.53488429 | 18.09776744 | 17.76107992 | 54.81373657 | 66.73265427 | 19.35022908 | 25.61866551 | 2.62005323  | 49.37519541 | 0.017622726 | 2.367910075 | 0.01796761  |
| 724 | hsa-miR-597    | 2.122146012 | 13.8716638  | 17.03938711 | 47.23575364 | 38.01501687 | 23.62439225 | 22.88895887 | 0.945635312 | 23.56938203 | 2.159919359 | 2.472163046 | 9.505001969 |
| 723 | hsa-miR-596    | 15.13414367 | 23.52662564 | 28.98523081 | 50.14935891 | 148.0802984 | 113.9032493 | 124.3819875 | 108.0012822 | 105.9506477 | 90.23025827 | 94.19594584 | 99.78472321 |
| 722 | hsa-miR-595    | 3.272558068 | 17.86337015 | 20.071879   | 48.33551006 | 94.1548471  | 25.69605138 | 18.67502488 | 0.049509456 | 46.3126519  | 23.7630011  | 3.520142882 | 16.83387757 |
| 721 | hsa-miR-593*   | 0.015554591 | 25.73236905 | 19.84671375 | 47.53981316 | 85.47370778 | 29.16941556 | 30.13011771 | 7.759529775 | 12.60058396 | 13.1009293  | 0.020423979 | 5.21109054  |
| 720 | hsa-miR-593    | 164.932539  | 186.5735713 | 148.6181564 | 240.0077171 | 92.47587474 | 30.32872919 | 30.51594554 | 12.6656499  | 24.69328622 | 16.63652653 | 11.20951587 | 17.51924429 |
| 719 | hsa-miR-592    | 14.37406446 | 14.07573932 | 57.81896133 | 46.46746947 | 23.11639696 | 24.24865114 | 0.060042676 | 0.048201595 | 4.454043941 | 0.020346334 | 0.018785295 | 0.015623989 |
| 718 | hsa-miR-591    | 13.36562118 | 13.90986092 | 39.2603918  | 38.24525759 | 15.49301944 | 3.92990936  | 8.703831077 | 0.045360464 | 15.66871265 | 14.69242533 | 10.38488631 | 0.014865017 |
| 717 | hsa-miR-590-5p | 17.50789336 | 8.241702205 | 53.78339513 | 31.36532719 | 29.10766937 | 24.5204908  | 0.053913162 | 13.33585389 | 9.777016231 | 16.21725222 | 1.701092399 | 0.016504947 |
| 716 | hsa-miR-590-3p | 10.32828907 | 0.013637182 | 49.84231497 | 45.27294698 | 21.11228072 | 8.222172631 | 0.054525987 | 0.047466699 | 1.538155433 | 0.017730068 | 0.571223995 | 0.015425357 |
| 715 | hsa-miR-589*   | 24.12644674 | 19.93426032 | 59.98667914 | 49.249419   | 34.74573091 | 44.41554681 | 11.06025781 | 6.096809801 | 14.19221117 | 17.08532617 | 0.018983693 | 7.757638581 |
| 714 | hsa-miR-589    | 9.641529315 | 1.923034407 | 46.29288881 | 35.30625803 | 39.95350036 | 9.486961237 | 12.47098248 | 9.558203574 | 20.37783335 | 15.39490611 | 3.847753343 | 7.670147018 |
| 713 | hsa-miR-588    | 14.46741555 | 5.099062071 | 43.4702041  | 46.75699425 | 24.47907676 | 22.76785927 | 1.548490005 | 0.04639425  | 13.29264206 | 0.019588232 | 1.143191782 | 0.015125267 |
| 712 | hsa-miR-587    | 11.53567988 | 8.786195767 | 49.13892488 | 37.41191396 | 18.52464707 | 12.96967063 | 0.055838352 | 1.981635207 | 9.157730237 | 12.58605243 | 0.017689329 | 3.662911328 |
| 711 | hsa-miR-586    | 13.72829078 | 7.731448299 | 47.17784266 | 37.78002999 | 13.9059091  | 15.50611851 | 0.058272009 | 1.538710752 | 11.700239   | 5.219532751 | 0.018347056 | 0.016403764 |
| 710 | hsa-miR-585    | 7.212881794 | 0.133914198 | 41.67219393 | 30.75366856 | 13.6533879  | 11.35971347 | 0.049267794 | 0.396461481 | 17.00111682 | 6.895661766 | 1.654093296 | 0.393107981 |
| 709 | hsa-miR-584    | 26.04926381 | 13.57693121 | 49.1446326  | 44.74890555 | 57.59478261 | 50.16170658 | 41.91906075 | 32.07560774 | 44.70632164 | 29.55683295 | 40.05759594 | 26.1544732  |
| 708 | hsa-miR-583    | 9.251756557 | 0.012044364 | 46.41594756 | 45.57573824 | 25.55391044 | 13.52462731 | 2.359020363 | 0.042733351 | 8.148596201 | 10.24884114 | 4.585406139 | 1.753132125 |
| 707 | hsa-miR-582-5p | 8.938391994 | 0.043831858 | 57.81672418 | 45.04169902 | 24.73560309 | 12.5467272  | 2.425883979 | 1.717949652 | 22.92496538 | 1.690343202 | 0.036479256 | 4.162920858 |
| 706 | hsa-miR-582-3p | 9.697967383 | 2.481295571 | 62.78908219 | 34.92196611 | 20.67378153 | 19.70045235 | 5.083512914 | 12.13547325 | 16.08668443 | 0.017641863 | 0.019255819 | 4.282821787 |
| 705 | hsa-miR-581    | 0.011861042 | 2.45874115  | 32.70659774 | 45.4324745  | 10.73746871 | 12.8203023  | 2.280451644 | 0.048486642 | 8.355962546 | 0.018579166 | 5.129677442 | 0.015705324 |
| 704 | hsa-miR-580    | 0.01191637  | 0.013092963 | 54.58848834 | 48.69981683 | 9.088172711 | 4.291576425 | 0.059682173 | 0.045987824 | 8.356368881 | 1.676870903 | 0.165347445 | 3.822747889 |
| 703 | hsa-miR-579    | 2.307952604 | 0.013036983 | 38.35706309 | 43.41128771 | 24.60348262 | 19.38492667 | 6.98652479  | 0.851815008 | 17.30363762 | 0.016933851 | 0.019136937 | 12.26184612 |
| 702 | hsa-miR-578    | 6.67015854  | 3.91105201  | 48.09774574 | 37.21057614 | 18.62540188 | 10.68610968 | 2.031585008 | 10.5583806  | 14.69062007 | 7.056134558 | 9.592902669 | 0.017168708 |
| 701 | hsa-miR-577    | 1.108476525 | 0.033290469 | 50.49352828 | 40.07900641 | 18.04084673 | 0.045170389 | 0.060893681 | 12.77646662 | 10.83298941 | 0.01574517  | 0.019033033 | 1.291625089 |
| 700 | hsa-miR-576-5p | 0.011614668 | 0.740529425 | 51.55061614 | 34.43784051 | 27.4689373  | 21.64115806 | 5.943888605 | 9.921140268 | 13.16993642 | 2.851138279 | 0.036973359 | 11.86833088 |

|     |                 |             |             |             |             |             |             |             |             |             |             |             |             |
|-----|-----------------|-------------|-------------|-------------|-------------|-------------|-------------|-------------|-------------|-------------|-------------|-------------|-------------|
| 699 | hsa-miR-576-3p  | 3.892675149 | 1.987334758 | 49.0768447  | 36.46903042 | 13.96712543 | 2.618141049 | 17.68235971 | 3.920306254 | 9.061076835 | 11.23133707 | 1.753836848 | 24.07461338 |
| 698 | hsa-miR-575     | 758.718025  | 701.190857  | 925.105591  | 878.7086735 | 73.588131   | 58.89690499 | 55.01291985 | 55.65764974 | 71.60954303 | 40.31107553 | 53.19781017 | 66.09047219 |
| 697 | hsa-miR-574-5p  | 259.7240863 | 218.0460213 | 268.6478636 | 266.631567  | 178.6567278 | 123.1694222 | 153.8971754 | 142.6806442 | 175.8582991 | 102.9298004 | 136.029049  | 138.3873495 |
| 696 | hsa-miR-574-3p  | 165.9530703 | 150.6714954 | 176.6346548 | 194.542744  | 189.0239588 | 177.6312355 | 175.2219675 | 146.7562216 | 159.3291394 | 109.4167325 | 132.1723883 | 128.7072166 |
| 695 | hsa-miR-573     | 0.015675837 | 0.81261346  | 53.10305621 | 50.07478508 | 38.47270704 | 12.29722859 | 0.123625904 | 0.049902969 | 31.82477138 | 2.483210339 | 0.034669814 | 2.161080836 |
| 694 | hsa-miR-572     | 62.53261749 | 49.67262105 | 90.30060475 | 83.23220507 | 48.18971837 | 35.52944281 | 35.06485876 | 38.50314194 | 45.19227081 | 26.92578645 | 24.42438685 | 33.49997261 |
| 693 | hsa-miR-571     | 12.79759669 | 1.34470395  | 39.25493763 | 40.77684867 | 58.43254712 | 21.11701601 | 3.601583206 | 5.870399806 | 57.36769197 | 14.79652644 | 22.26086144 | 38.05884792 |
| 692 | hsa-miR-570     | 2.072385979 | 0.013574896 | 36.43849897 | 38.06748741 | 47.57210194 | 14.01277309 | 5.981752978 | 4.445397522 | 16.06345153 | 0.018247128 | 6.999831444 | 21.08782578 |
| 691 | hsa-miR-569     | 0.015550301 | 1.442428122 | 39.61013822 | 39.88640065 | 81.62188365 | 16.50806397 | 12.36824089 | 10.45213932 | 14.19174295 | 0.01699828  | 5.186189712 | 9.81653291  |
| 690 | hsa-miR-568     | 5.45230983  | 13.63569248 | 32.87519263 | 41.96575779 | 129.141917  | 70.01727566 | 61.38620738 | 46.68641996 | 74.35660562 | 27.07618311 | 30.08550726 | 50.93953007 |
| 689 | hsa-miR-567     | 1.55926711  | 3.219803498 | 24.54401202 | 39.91848931 | 24.43362347 | 12.28897978 | 53.51344081 | 15.35508375 | 4.129349348 | 0.01916221  | 3.623450299 | 5.648321303 |
| 688 | hsa-miR-566     | 0.011639247 | 13.51928461 | 23.4416684  | 41.2343579  | 23.56041927 | 7.237715746 | 19.27009992 | 24.06415945 | 8.773983612 | 2.557315136 | 22.18722458 | 31.29416796 |
| 687 | hsa-miR-564     | 6.862911569 | 22.46844937 | 39.50507324 | 62.36619574 | 34.73186481 | 18.69692639 | 35.83232823 | 31.37798072 | 41.85444878 | 30.94305102 | 29.70883527 | 35.00633756 |
| 686 | hsa-miR-563     | 8.557900626 | 15.54377259 | 42.77435521 | 50.2778623  | 32.77894373 | 23.36804182 | 35.58078781 | 24.34164608 | 35.2913641  | 26.1528295  | 37.51376    | 24.56267571 |
| 685 | hsa-miR-562     | 0.012094737 | 11.26149952 | 28.49345636 | 33.83817792 | 21.91964057 | 11.54163688 | 7.960361841 | 28.43555883 | 16.29236683 | 7.772404346 | 17.17903126 | 21.75596742 |
| 684 | hsa-miR-561     | 0.01239949  | 2.758210695 | 18.14651684 | 36.79513749 | 23.27697111 | 25.60183704 | 41.1786125  | 12.73712133 | 7.808820583 | 0.021796017 | 23.43476327 | 12.44450368 |
| 683 | hsa-miR-559     | 0.013173991 | 8.512855975 | 21.9395921  | 42.44906093 | 21.00739048 | 21.56700057 | 10.70770354 | 8.276617932 | 2.415079948 | 0.030524064 | 13.4675049  | 13.76070639 |
| 682 | hsa-miR-558     | 7.272597258 | 16.69692574 | 10.48379718 | 34.75772893 | 20.85802746 | 14.02707442 | 13.60274801 | 13.00339374 | 22.91292997 | 0.021492773 | 22.74102194 | 12.64296093 |
| 681 | hsa-miR-557     | 7.790219447 | 33.70497476 | 43.95000771 | 25.55615484 | 18.08478181 | 11.10916959 | 21.04953136 | 0.039341171 | 7.183074055 | 8.412132463 | 21.85424331 | 189.3802818 |
| 680 | hsa-miR-556-5p  | 0.018592669 | 27.00933605 | 42.09043662 | 15.20094429 | 0.092229752 | 0.049676922 | 16.04691198 | 0.039974741 | 3.270459857 | 7.099225836 | 20.63701395 | 31.78597792 |
| 679 | hsa-miR-556-3p  | 0.013159612 | 15.31905346 | 43.95120027 | 16.99582435 | 7.536661607 | 23.94769888 | 34.35957896 | 6.008473601 | 10.69694903 | 1.407211393 | 5.068186492 | 12.70060846 |
| 678 | hsa-miR-555     | 0.428981781 | 13.28049963 | 38.42448786 | 15.77251691 | 11.64810804 | 21.41353178 | 24.60187963 | 2.401185304 | 15.11768069 | 13.95996064 | 12.11693706 | 0.641877171 |
| 677 | hsa-miR-554     | 11.82832679 | 26.07072507 | 33.70237198 | 26.7917936  | 30.54177538 | 22.37388346 | 21.43705625 | 1.517719254 | 11.12351528 | 11.98779892 | 9.684790219 | 0.016225596 |
| 676 | hsa-miR-553     | 242.8799172 | 339.7158096 | 387.3705207 | 337.0690253 | 7.919715922 | 22.37813125 | 26.01108926 | 0.052329508 | 14.70586549 | 7.741832909 | 1.202962485 | 0.01646568  |
| 674 | hsa-miR-551b*   | 2.763216333 | 22.92318833 | 36.75122028 | 26.07794529 | 19.28945871 | 24.33744895 | 33.46888166 | 3.884278812 | 40.46567736 | 32.31041249 | 27.14213527 | 4.370454024 |
| 672 | hsa-miR-551a    | 0.011997811 | 24.18283737 | 36.76444599 | 18.07251976 | 33.48170422 | 46.16069513 | 50.72761583 | 41.40202099 | 40.88397421 | 43.79901237 | 28.8671417  | 21.35793594 |
| 671 | hsa-miR-550*    | 15.19262028 | 19.16679844 | 37.21008642 | 26.15863175 | 38.5957381  | 33.7855096  | 53.07342409 | 20.09028693 | 8.969827046 | 12.62689246 | 13.29699128 | 15.29861986 |
| 670 | hsa-miR-550     | 27.41829561 | 33.27934528 | 47.52508597 | 45.55971548 | 24.84229223 | 39.96926507 | 35.73375221 | 14.92410291 | 41.93893764 | 48.08770521 | 33.6494409  | 15.368532   |
| 669 | hsa-miR-549     | 2.651149905 | 18.97401739 | 47.81929378 | 18.18252305 | 3.339505744 | 2.802793687 | 41.91494042 | 2.210981862 | 20.43203847 | 17.1320949  | 0.038162102 | 1.28474378  |
| 668 | hsa-miR-548p    | 0.013734808 | 16.32286978 | 34.16756316 | 24.20555798 | 17.64094747 | 22.71197407 | 25.33623167 | 7.059125676 | 17.4510286  | 20.16344158 | 9.021147362 | 0.016403326 |
| 667 | hsa-miR-548o    | 0.012085665 | 15.85779455 | 38.97645066 | 24.2725462  | 15.75147369 | 22.47024284 | 63.11063502 | 12.22650058 | 15.4006036  | 0.120547165 | 34.83867659 | 4.391328975 |
| 666 | hsa-miR-548n    | 264.5751656 | 363.2511552 | 527.3376528 | 328.3759498 | 20.97238125 | 17.03988726 | 49.06078234 | 13.18792619 | 7.914444821 | 0.020823934 | 31.65906751 | 14.99793471 |
| 665 | hsa-miR-548m    | 2311.037253 | 2880.152961 | 3381.422803 | 2977.760034 | 20.65030675 | 29.09335164 | 22.19533238 | 36.89641187 | 40.15874476 | 28.88959972 | 40.78352541 | 34.93030697 |
| 664 | hsa-miR-548l    | 121.5779574 | 192.1465384 | 237.2308981 | 199.2060116 | 16.71196413 | 21.70546503 | 27.86433322 | 15.71997144 | 24.55522241 | 9.960215999 | 12.17297135 | 19.41912224 |
| 662 | hsa-miR-548j    | 1.282911807 | 26.40527986 | 36.14059312 | 32.56014137 | 6.658848228 | 23.78912133 | 22.45675435 | 15.56644809 | 15.49068393 | 14.89328204 | 14.64727509 | 17.36152654 |
| 661 | hsa-miR-548i    | 0.945433794 | 18.62501017 | 35.53348172 | 21.2623459  | 8.404808229 | 14.7745147  | 30.52636516 | 11.46564106 | 26.22419397 | 14.32856177 | 23.32980536 | 20.12295393 |
| 660 | hsa-miR-548h    | 4146.92718  | 5486.010463 | 3272.305915 | 2505.146833 | 51.53868877 | 29.87656062 | 31.54399958 | 24.41348888 | 104.4414376 | 29.94734672 | 46.65570924 | 28.50741706 |
| 658 | hsa-miR-548f    | 984.4001177 | 864.2356721 | 1066.621029 | 966.0572153 | 25.79512394 | 35.07123814 | 37.38570736 | 23.03606306 | 50.70145882 | 14.39264053 | 41.1567015  | 41.08282745 |
| 657 | hsa-miR-548e    | 0.015850907 | 21.38693536 | 29.92899436 | 14.99429627 | 34.10087234 | 31.61915853 | 25.17585177 | 14.82150296 | 3.45891112  | 17.98703586 | 27.14756664 | 22.60350099 |
| 654 | hsa-miR-548c-5p | 57.65139441 | 90.9799954  | 94.60654902 | 119.9127529 | 15.60011362 | 19.47252982 | 40.4916169  | 12.75072091 | 15.31462365 | 23.21697048 | 19.74793659 | 7.945420038 |
| 651 | hsa-miR-548b-3p | 24.29620369 | 31.8246819  | 18.83974539 | 46.76202269 | 23.48143947 | 30.26956652 | 10.59812026 | 0.043595921 | 21.34288693 | 13.59300513 | 10.13315363 | 0.015159523 |
| 650 | hsa-miR-548a-5p | 17.7909395  | 30.51243563 | 25.44525294 | 41.3022225  | 16.48746478 | 26.27466035 | 0.046105282 | 0.04645932  | 19.55563752 | 15.75964465 | 9.413462753 | 0.015333084 |
| 649 | hsa-miR-548a-3p | 10.41816727 | 21.2366422  | 18.14114824 | 38.72970926 | 14.77973717 | 18.57926306 | 9.412139281 | 0.047056644 | 16.76240582 | 10.63437294 | 0.018230297 | 0.015958401 |
| 648 | hsa-miR-545*    | 1.283176913 | 33.68194788 | 17.20500192 | 42.54873644 | 11.24642961 | 1.735377051 | 6.885481403 | 0.049376771 | 17.18889296 | 14.54656973 | 2.159607182 | 9.123758698 |
| 647 | hsa-miR-545     | 11.77879721 | 26.34941845 | 19.58206818 | 41.11300458 | 19.01307519 | 20.32233325 | 10.67119321 | 0.042180404 | 13.10877273 | 13.12467669 | 0.036319373 | 0.016988205 |
| 646 | hsa-miR-544     | 13.79917261 | 23.11698072 | 32.38670208 | 38.23889054 | 23.59126077 | 28.45743672 | 2.955441077 | 9.551290387 | 28.80836107 | 28.74991094 | 20.33407983 | 4.267815422 |
| 645 | hsa-miR-543     | 12.70280035 | 19.85637772 | 19.27775184 | 39.04436339 | 25.79174067 | 27.1571018  | 19.40301934 | 1.986553951 | 60.11438249 | 51.19064276 | 45.82210485 | 31.12020561 |

|     |                 |              |             |             |             |             |             |             |             |             |             |             |             |
|-----|-----------------|--------------|-------------|-------------|-------------|-------------|-------------|-------------|-------------|-------------|-------------|-------------|-------------|
| 644 | hsa-miR-542-5p  | 28.43572028  | 40.17399143 | 35.26621086 | 52.48932277 | 56.73139534 | 60.51770585 | 40.26721929 | 56.00572259 | 20.37523181 | 15.64062469 | 8.300378505 | 0.015119005 |
| 643 | hsa-miR-542-3p  | 2.546763028  | 23.09209173 | 22.25386511 | 45.05914557 | 30.56465847 | 14.78872363 | 0.074980932 | 0.046354057 | 43.36969759 | 44.25700973 | 35.29458643 | 24.32623004 |
| 642 | hsa-miR-541*    | 12.56893808  | 20.63959876 | 20.01402972 | 36.74346368 | 39.38257681 | 45.40058639 | 34.75617411 | 26.37607804 | 34.22887108 | 12.75011399 | 16.79082507 | 9.97493316  |
| 641 | hsa-miR-541     | 0.011357657  | 20.02380572 | 17.53866443 | 38.19315897 | 18.97038228 | 28.37665882 | 26.52481271 | 1.827193555 | 19.4168189  | 16.30190805 | 0.024923384 | 4.928037438 |
| 640 | hsa-miR-539     | 9.790530178  | 28.16372209 | 28.46096333 | 42.18758695 | 13.16505118 | 20.65231239 | 13.35799471 | 0.045498173 | 76.6248825  | 53.55430447 | 32.99157809 | 33.26158883 |
| 639 | hsa-miR-532-5p  | 30.05757697  | 32.21875138 | 40.81958326 | 58.14916301 | 89.03529486 | 91.65888183 | 93.06868607 | 65.63280746 | 43.8514524  | 41.01028826 | 36.42732975 | 28.15674946 |
| 638 | hsa-miR-532-3p  | 13.30632853  | 20.30828965 | 16.90484716 | 35.30325856 | 53.90141849 | 63.2652981  | 37.86351247 | 38.88499068 | 35.55787011 | 3.845225465 | 0.019097803 | 9.483116732 |
| 637 | hsa-miR-526b*   | 4.834646381  | 20.72474581 | 21.55303964 | 41.15618037 | 37.91140827 | 21.14793514 | 9.096463607 | 0.331833927 | 23.42499422 | 2.959706228 | 0.710379878 | 0.015963503 |
| 636 | hsa-miR-526b    | 11.370694969 | 20.67757675 | 13.04054613 | 43.05374085 | 31.02256218 | 22.5579987  | 10.35906398 | 0.049401358 | 34.50602319 | 5.615442776 | 1.153017732 | 3.498723583 |
| 635 | hsa-miR-525-5p  | 3.129485794  | 22.28528382 | 7.222911698 | 38.29182622 | 21.83009477 | 19.09189487 | 2.935094627 | 7.452696602 | 22.96472753 | 9.090191064 | 0.018999585 | 10.25411114 |
| 634 | hsa-miR-525-3p  | 8.56688106   | 16.46174311 | 12.97024189 | 33.54785665 | 31.77335718 | 32.6287116  | 33.76776933 | 0.642845774 | 22.68038404 | 7.967356311 | 0.01897427  | 0.90159577  |
| 633 | hsa-miR-524-5p  | 11.86523447  | 15.75618402 | 20.19801626 | 45.59805854 | 39.88102935 | 32.47523061 | 0.060105944 | 0.045810627 | 19.09656612 | 16.88705877 | 1.613273157 | 11.44790747 |
| 632 | hsa-miR-524-3p  | 0.011488842  | 18.36833924 | 20.48076174 | 40.95608472 | 21.70613889 | 40.04791537 | 18.08448229 | 17.65274069 | 23.49032327 | 18.6053945  | 13.53244529 | 28.97976682 |
| 631 | hsa-miR-523     | 8.3664641    | 15.25918713 | 15.63305787 | 38.12547533 | 23.94905485 | 21.18390306 | 13.15128616 | 7.173322629 | 29.6793353  | 8.916776385 | 8.643809576 | 8.943353326 |
| 630 | hsa-miR-522     | 5.198481083  | 21.56318976 | 15.86968837 | 38.82980566 | 32.37676889 | 43.52416687 | 30.39275811 | 0.042988698 | 19.86476341 | 9.658253574 | 15.44409838 | 16.01973382 |
| 629 | hsa-miR-521     | 0.011656367  | 16.90789268 | 13.20495939 | 40.58921574 | 26.60388882 | 45.89163802 | 45.4932848  | 1.926862994 | 12.61860179 | 11.85031095 | 0.01906303  | 13.69602163 |
| 628 | hsa-miR-520h    | 5.023831739  | 15.50389026 | 9.672010878 | 33.16430155 | 33.61057439 | 50.48759796 | 24.21308617 | 0.855773059 | 27.14522277 | 8.237614285 | 5.639636468 | 16.98550808 |
| 627 | hsa-miR-520g    | 8.012993054  | 17.82364273 | 15.39197153 | 43.12845469 | 64.71932227 | 43.64520805 | 25.83623536 | 6.994323917 | 74.81483071 | 25.10699537 | 0.322643143 | 11.14919563 |
| 626 | hsa-miR-520f    | 243.3080168  | 239.5043759 | 216.5025756 | 279.0294471 | 96.5259464  | 40.82249373 | 25.89577818 | 9.097365009 | 52.25586408 | 31.26293106 | 4.82850924  | 10.25784167 |
| 625 | hsa-miR-520e    | 3.803597753  | 16.56285896 | 21.42527952 | 41.37487562 | 92.97331813 | 37.53554524 | 8.399051793 | 1.202290022 | 27.60212734 | 21.15369133 | 5.512230611 | 15.42769117 |
| 624 | hsa-miR-520d-5p | 6.01261735   | 15.12207966 | 7.103773753 | 67.72986591 | 42.49621824 | 31.09344486 | 24.02750902 | 6.6350196   | 43.71844315 | 31.00589157 | 12.34531954 | 31.43136279 |
| 623 | hsa-miR-520d-3p | 4.254344164  | 12.21934362 | 13.19458254 | 39.88119804 | 89.18456347 | 38.81206573 | 23.30038636 | 0.045357321 | 48.30019213 | 18.92984786 | 16.54455455 | 14.57145448 |
| 622 | hsa-miR-520c-3p | 0.015364226  | 12.65451997 | 1.599338313 | 63.67055784 | 72.48699305 | 30.30923859 | 20.97771402 | 7.915237311 | 31.56366013 | 15.1108262  | 6.503791854 | 0.016475813 |
| 621 | hsa-miR-520b    | 9.940985876  | 12.26630722 | 30.37162141 | 38.56152106 | 50.91005834 | 16.96719139 | 7.42353147  | 6.597082499 | 18.41119481 | 2.316636273 | 0.018507075 | 0.015066371 |
| 620 | hsa-miR-520a-5p | 10.03746571  | 3.369711828 | 36.31002008 | 42.79723148 | 24.92112264 | 5.931497459 | 12.5816262  | 0.046139393 | 22.65040332 | 14.47791538 | 6.686647317 | 4.094721783 |
| 619 | hsa-miR-520a-3p | 11.8993122   | 11.49496249 | 31.52503453 | 47.19048944 | 28.02312224 | 20.00363618 | 14.06672321 | 0.042494446 | 21.33709985 | 15.85152523 | 7.480566429 | 0.017298192 |
| 618 | hsa-miR-519e*   | 7.104873271  | 10.68301452 | 39.56407913 | 48.60490442 | 16.31282335 | 35.84332804 | 5.376903558 | 14.21233711 | 20.18638718 | 15.14362098 | 13.68177836 | 13.1523276  |
| 617 | hsa-miR-519e    | 0.011461276  | 1.81075522  | 23.83063557 | 33.99684443 | 42.5177211  | 41.6545581  | 31.34135505 | 28.6852584  | 37.13993847 | 18.93917628 | 24.24491818 | 20.87007301 |
| 616 | hsa-miR-519d    | 12.99455922  | 2.890480202 | 34.99011346 | 35.37640899 | 52.73556523 | 46.03764496 | 33.57033264 | 30.20133067 | 12.46264671 | 5.113664237 | 10.54709071 | 0.330844161 |
| 615 | hsa-miR-519c-3p | 2.91610547   | 4.36206391  | 40.6043821  | 38.2929988  | 37.84735514 | 1.912331736 | 0.053048079 | 6.836455998 | 19.57993456 | 8.855784495 | 15.96885151 | 4.006253814 |
| 614 | hsa-miR-519b-3p | 104.4798981  | 106.2515648 | 137.1262939 | 133.7979093 | 32.06159576 | 19.2291132  | 1.585329885 | 12.31052447 | 24.04252837 | 2.654720418 | 7.899965694 | 0.015372155 |
| 613 | hsa-miR-519a    | 4.549693088  | 5.258230268 | 32.89077307 | 47.98079197 | 28.49951978 | 16.52665745 | 14.06272266 | 0.047301663 | 12.76343678 | 0.017807161 | 6.498843517 | 4.186262701 |
| 612 | hsa-miR-518f*   | 4.416448793  | 8.240977095 | 26.6414069  | 46.97393593 | 23.69773657 | 7.993304703 | 11.21079569 | 5.238818538 | 21.8321244  | 13.21248773 | 1.917938007 | 0.015578529 |
| 611 | hsa-miR-518f    | 9.552993639  | 2.722323956 | 32.9634211  | 47.77503194 | 26.54185779 | 11.14077432 | 0.054061265 | 0.048049786 | 31.90804519 | 9.394051094 | 0.018281982 | 6.69690121  |
| 610 | hsa-miR-518e*   | 5.246250652  | 2.061299938 | 34.95033516 | 42.0493047  | 34.27710463 | 13.27435706 | 4.675344389 | 5.494157478 | 28.93311555 | 2.02749552  | 12.79042663 | 5.447093609 |
| 609 | hsa-miR-518e    | 4.076644554  | 3.434981457 | 23.8235371  | 35.94027481 | 36.94741868 | 21.04694029 | 15.57580459 | 15.59357505 | 28.67822168 | 7.647550019 | 0.019008588 | 3.16106862  |
| 608 | hsa-miR-518d-5p | 15.80431469  | 6.287752025 | 31.19110974 | 46.22977847 | 37.62085332 | 15.42254597 | 27.25800803 | 12.51185619 | 26.82380724 | 0.660071246 | 1.683393126 | 15.13963438 |
| 607 | hsa-miR-518d-3p | 9.141268925  | 1.204010445 | 26.69033842 | 41.6509843  | 35.22419692 | 19.70379297 | 12.32873535 | 17.45672318 | 32.71180415 | 3.507740695 | 0.019017157 | 16.68569957 |
| 606 | hsa-miR-518c*   | 12.60304448  | 8.657227147 | 33.95413091 | 55.13577335 | 32.95950585 | 30.22618552 | 21.23490333 | 9.021667526 | 25.01311081 | 0.017802768 | 3.678286722 | 7.587833341 |
| 605 | hsa-miR-518c    | 5.539045101  | 0.013632929 | 23.32828922 | 39.66786898 | 36.06214813 | 8.772533902 | 19.22889006 | 19.48928023 | 25.05830699 | 13.67949028 | 1.311018262 | 35.15180838 |
| 604 | hsa-miR-518b    | 11.19026792  | 0.527433624 | 30.08798393 | 48.2154647  | 42.23306757 | 24.26045326 | 42.09652324 | 27.8540361  | 32.70698779 | 19.62504127 | 0.018682596 | 26.19489329 |
| 603 | hsa-miR-518a-5p | 7.990586063  | 9.155574133 | 32.40815237 | 44.49239541 | 49.56394904 | 21.06028782 | 24.46789062 | 15.85163799 | 21.75931147 | 13.00409479 | 3.96582782  | 22.93979747 |
| 602 | hsa-miR-518a-3p | 7.521818671  | 0.011617989 | 23.08300877 | 37.20814999 | 43.79582018 | 16.58949265 | 12.56517741 | 18.26761571 | 12.95259177 | 11.87860803 | 0.038135203 | 23.41545849 |
| 601 | hsa-miR-517c    | 1.429045752  | 3.369083484 | 37.19938229 | 31.68320325 | 31.32946351 | 6.036796985 | 49.0536207  | 13.57898608 | 18.4988398  | 15.41165242 | 11.32474972 | 22.10643604 |
| 600 | hsa-miR-517b    | 71.47281261  | 49.73601495 | 93.57055146 | 102.5428725 | 38.33632135 | 15.44880907 | 12.12489562 | 12.71402545 | 17.52328874 | 3.12189834  | 8.503331355 | 19.25081655 |
| 599 | hsa-miR-517a    | 0.011742145  | 0.012077616 | 22.03864297 | 38.96510953 | 31.28059226 | 23.93815726 | 21.19289025 | 18.8122547  | 34.11097006 | 1.564868414 | 8.573232639 | 19.60685688 |
| 598 | hsa-miR-517*    | 0.012689831  | 6.156522983 | 24.61868226 | 38.68387938 | 28.25223302 | 13.77780696 | 11.11562377 | 10.85059407 | 19.3529661  | 0.275256968 | 0.01875255  | 17.47143375 |

|     |                  |             |             |             |             |             |             |             |             |             |             |             |             |
|-----|------------------|-------------|-------------|-------------|-------------|-------------|-------------|-------------|-------------|-------------|-------------|-------------|-------------|
| 597 | hsa-miR-516b     | 10.97621875 | 6.177672479 | 36.06591883 | 37.03627284 | 33.81777936 | 13.81942348 | 0.059630635 | 9.083250504 | 34.44312356 | 0.020131607 | 0.020506134 | 12.33761827 |
| 596 | hsa-miR-516a-5p  | 14.60811342 | 5.769850838 | 32.07915438 | 43.52313554 | 102.6708593 | 21.4013074  | 13.46384006 | 9.517903335 | 65.43827393 | 28.04151955 | 9.873275467 | 39.7325212  |
| 595 | hsa-miR-516a-3p  | 8.458761775 | 4.144751515 | 29.21752623 | 35.92389734 | 94.42444363 | 28.58057779 | 32.38730593 | 20.91543961 | 0.034352501 | 0.020972876 | 8.121450742 | 16.7001855  |
| 594 | hsa-miR-515-5p   | 0.016989009 | 0.014221269 | 29.08082499 | 44.92432873 | 42.56184386 | 19.64133406 | 25.03224327 | 15.32507318 | 49.54861008 | 1.989852506 | 0.194803394 | 13.50142313 |
| 593 | hsa-miR-515-3p   | 103.2173234 | 60.91975259 | 126.5021595 | 164.1860942 | 89.93232561 | 18.57765309 | 9.262375175 | 0.050500394 | 9.156320956 | 3.599021867 | 15.81362322 | 16.92159002 |
| 592 | hsa-miR-514      | 0.015909017 | 4.35766287  | 33.4448677  | 34.51267154 | 39.03133985 | 17.44024636 | 3.798020102 | 12.35470306 | 18.89287144 | 0.020743176 | 20.37314864 | 15.42415884 |
| 591 | hsa-miR-513c     | 3.572144079 | 7.237764335 | 28.56468025 | 35.2487094  | 22.72867344 | 31.04080512 | 25.68124763 | 5.570257135 | 13.73871095 | 0.01883633  | 20.47356922 | 14.01328283 |
| 590 | hsa-miR-513b     | 3.766248991 | 20.97674621 | 23.95187752 | 39.76439648 | 16.95166348 | 11.72986773 | 8.87851514  | 2.115570576 | 48.73721697 | 8.068654788 | 19.7490564  | 29.38670565 |
| 589 | hsa-miR-513a-5p  | 244.7802715 | 223.4939456 | 271.7029814 | 245.4835184 | 26.36264802 | 12.56091931 | 25.40036774 | 14.93339832 | 13.82426259 | 15.08097761 | 35.64930448 | 19.82361109 |
| 588 | hsa-miR-513a-3p  | 0.012351108 | 5.205773851 | 28.27229847 | 38.86672437 | 11.20411233 | 24.18624735 | 23.47557351 | 8.901136011 | 19.13839301 | 0.017999785 | 24.9248853  | 20.4784644  |
| 587 | hsa-miR-512-5p   | 2.373203099 | 12.90192395 | 18.91311686 | 34.32729096 | 22.21802883 | 15.80455749 | 12.67133074 | 11.85796083 | 40.31752431 | 7.322427207 | 29.8269313  | 22.42838432 |
| 586 | hsa-miR-512-3p   | 0.011869559 | 7.297309525 | 22.22607174 | 36.60800773 | 19.82554266 | 9.492991749 | 16.74078003 | 7.70057278  | 27.0548988  | 15.34624174 | 20.03347771 | 22.90767247 |
| 584 | hsa-miR-510      | 11.25833513 | 6.605625281 | 30.33546297 | 37.5182041  | 34.87478875 | 8.788359906 | 16.02446171 | 15.64786439 | 10.89176492 | 27.81518337 | 24.64974706 | 295.4005612 |
| 582 | hsa-miR-509-3p   | 2.197667492 | 30.89333589 | 35.74404175 | 17.85124689 | 17.70901952 | 0.054075941 | 6.406001389 | 1.416224629 | 0.017262993 | 22.44989827 | 19.12465248 | 164.0447007 |
| 581 | hsa-miR-509-3-5p | 1.465513481 | 19.40077664 | 32.01178835 | 18.57863206 | 15.1128094  | 17.70270155 | 22.1676688  | 2.933207229 | 4.18786927  | 30.97194155 | 25.73250458 | 19.33678067 |
| 580 | hsa-miR-508-5p   | 6.206503966 | 21.81155683 | 39.8656638  | 21.53386026 | 26.26457744 | 24.15065551 | 23.30008964 | 8.546158429 | 0.017892356 | 40.83201499 | 18.27070069 | 0.016239644 |
| 578 | hsa-miR-507      | 2.778473234 | 23.58963159 | 34.29383712 | 28.86708476 | 3.56335403  | 2.436850084 | 11.01337974 | 0.046264986 | 12.45949273 | 15.40844339 | 14.32480219 | 0.015152744 |
| 577 | hsa-miR-506      | 1.640292929 | 22.81748509 | 25.68754968 | 17.58261572 | 40.58882703 | 37.19000663 | 44.22871304 | 30.51993143 | 33.75656932 | 42.53118036 | 22.94147107 | 23.80563194 |
| 576 | hsa-miR-505*     | 19.47668237 | 63.97969952 | 51.22933775 | 40.43282855 | 44.0605552  | 95.75464484 | 56.03155909 | 35.77759606 | 43.98450592 | 93.78677709 | 40.0685562  | 10.65973337 |
| 575 | hsa-miR-505      | 0.011618857 | 21.97014355 | 39.33333287 | 22.40007327 | 25.15390726 | 29.91027972 | 16.81457727 | 12.41282922 | 26.96333133 | 30.46230299 | 27.58936532 | 8.98609318  |
| 573 | hsa-miR-503      | 15.29774968 | 43.96552671 | 41.94183696 | 38.77621854 | 46.50322609 | 49.06745112 | 58.79115222 | 35.54057872 | 24.85785715 | 42.93647634 | 44.15837984 | 13.05911459 |
| 571 | hsa-miR-502-3p   | 0.011916253 | 22.42836931 | 62.29623482 | 27.65937588 | 22.68122413 | 41.47119374 | 26.23761862 | 19.76081465 | 2.269348362 | 19.73281711 | 16.28607314 | 0.016439583 |
| 570 | hsa-miR-501-5p   | 0.0115832   | 23.32217993 | 34.93383117 | 23.72491511 | 21.23396415 | 28.52826939 | 25.83073843 | 16.4123347  | 41.15231398 | 36.10740974 | 36.56964312 | 9.453340763 |
| 568 | hsa-miR-500*     | 0.011585263 | 28.98402874 | 30.77584713 | 28.83671364 | 29.5757061  | 34.80588208 | 31.3525314  | 29.88363629 | 30.78984899 | 12.36040274 | 34.04287787 | 19.75101788 |
| 564 | hsa-miR-498      | 2649.401338 | 3531.82736  | 3783.785359 | 5253.764081 | 39.36734204 | 76.59738927 | 44.36872337 | 36.91101173 | 95.36427659 | 99.61735581 | 92.46334252 | 72.646334   |
| 562 | hsa-miR-497      | 31.15680811 | 45.05651704 | 69.20811249 | 54.22137221 | 49.15601226 | 40.79376323 | 12.6496297  | 21.42902483 | 37.03518555 | 14.77235431 | 22.92596023 | 20.97267451 |
| 560 | hsa-miR-495      | 1.580918378 | 18.99155257 | 27.16900181 | 18.19458758 | 64.96752394 | 12.77853562 | 17.08383643 | 24.26605346 | 54.86974492 | 39.82687894 | 44.57702846 | 19.34964805 |
| 559 | hsa-miR-494      | 31.47134178 | 38.50767938 | 43.10534809 | 49.5054956  | 42.39751278 | 37.86787923 | 38.15361505 | 23.82043048 | 27.37892938 | 36.31451612 | 41.94684273 | 29.59252939 |
| 558 | hsa-miR-493*     | 0.015765948 | 20.23383466 | 30.11764334 | 29.01513502 | 37.05519083 | 7.476397214 | 4.210767928 | 0.045274857 | 17.74775912 | 30.58715409 | 32.71403144 | 18.74067872 |
| 556 | hsa-miR-492      | 0.017524974 | 16.81998161 | 26.55092243 | 19.22995692 | 11.60996957 | 33.07909466 | 14.57696242 | 12.89278598 | 18.75640083 | 25.52427947 | 23.82278377 | 0.102887657 |
| 555 | hsa-miR-491-5p   | 3.458124951 | 23.30108513 | 26.09056336 | 23.69261332 | 52.40742219 | 38.27475184 | 30.64631122 | 25.9238537  | 14.12118263 | 18.86435738 | 10.99654879 | 0.015467315 |
| 553 | hsa-miR-490-5p   | 15.45359332 | 29.26821489 | 17.03077676 | 42.65280467 | 30.40784862 | 30.94331749 | 20.50304141 | 0.044865512 | 26.72304237 | 37.19315927 | 12.25686156 | 0.014665695 |
| 552 | hsa-miR-490-3p   | 13.31557852 | 25.34964167 | 17.35305615 | 42.76155653 | 23.33497998 | 18.56814565 | 16.87137081 | 0.047591292 | 11.28851004 | 34.12429352 | 8.806882963 | 0.01563725  |
| 551 | hsa-miR-489      | 30.14299014 | 40.05066243 | 46.80951384 | 66.66368692 | 22.32886638 | 26.69986757 | 10.52249614 | 0.044897887 | 10.0787419  | 21.01519842 | 1.611742935 | 0.583646905 |
| 550 | hsa-miR-488*     | 8.101992487 | 23.02464149 | 16.39027326 | 35.13411715 | 41.21074808 | 14.2138317  | 23.65301757 | 0.048112089 | 23.91519209 | 29.36293511 | 0.017693698 | 2.834189422 |
| 549 | hsa-miR-488      | 20.5589041  | 21.15589073 | 19.11908997 | 39.62152232 | 24.73586853 | 13.29007491 | 17.14740634 | 0.044171318 | 16.17111853 | 20.30800251 | 0.759811484 | 0.016226496 |
| 548 | hsa-miR-487b     | 12.4477856  | 24.31209603 | 24.07299406 | 33.96042443 | 43.49453408 | 11.05267843 | 21.53271106 | 3.941625239 | 81.34255514 | 85.64694423 | 51.78391221 | 41.27201123 |
| 547 | hsa-miR-487a     | 8.578205955 | 21.09657318 | 22.00187303 | 49.31364778 | 37.4002101  | 26.51534571 | 16.19441764 | 1.42637688  | 71.58632792 | 68.41419954 | 41.42436335 | 17.15943102 |
| 546 | hsa-miR-486-5p   | 19.18803252 | 26.02390494 | 25.82573609 | 42.06895349 | 81.02959248 | 50.78291679 | 47.84820197 | 47.07299983 | 31.52653743 | 30.01171827 | 0.017650099 | 5.964302637 |
| 545 | hsa-miR-486-3p   | 12.71703962 | 20.91600068 | 15.63351042 | 42.5356409  | 42.81822228 | 49.4476201  | 20.98633944 | 14.54246237 | 62.42577391 | 66.82910729 | 46.72076121 | 38.94120268 |
| 544 | hsa-miR-485-5p   | 10.41623033 | 23.2796707  | 18.66576216 | 38.45299377 | 36.64267748 | 13.34669372 | 11.31008874 | 0.042411584 | 94.22476454 | 108.1039859 | 64.58564373 | 65.38491167 |
| 543 | hsa-miR-485-3p   | 16.21190596 | 20.32184887 | 31.42990723 | 42.71062191 | 95.38228858 | 76.97825424 | 77.32414984 | 61.88504453 | 189.0184814 | 173.8695707 | 119.0625841 | 143.3059548 |
| 542 | hsa-miR-484      | 36.9588673  | 38.46190387 | 32.18992987 | 57.84186973 | 149.4127884 | 130.7184704 | 156.8131773 | 116.711891  | 37.6231846  | 27.58728292 | 11.09871716 | 25.18587131 |
| 541 | hsa-miR-483-5p   | 1916.103053 | 1803.783077 | 1924.210772 | 2381.500105 | 172.6576959 | 150.7933235 | 133.9124308 | 138.7952967 | 34.11469488 | 24.17125869 | 5.978306531 | 7.732579852 |
| 540 | hsa-miR-483-3p   | 8.035496444 | 15.59529195 | 16.64341081 | 37.95436065 | 50.15003096 | 31.07909373 | 35.38254349 | 17.89345909 | 209.4258321 | 195.4994623 | 172.1292421 | 181.2885649 |
| 539 | hsa-miR-455-5p   | 8.394425541 | 17.66134169 | 24.8009195  | 38.5756511  | 28.91957177 | 28.48655995 | 14.57478634 | 2.386568362 | 22.87912079 | 19.05232648 | 7.468925077 | 11.12234976 |
| 538 | hsa-miR-455-3p   | 94.64184661 | 89.50450419 | 107.0362876 | 117.2499729 | 251.0704097 | 229.7856131 | 240.7809791 | 206.6203296 | 319.0591825 | 290.2789803 | 303.1457386 | 314.1339198 |

|     |                 |             |             |             |             |             |             |             |             |             |             |             |             |
|-----|-----------------|-------------|-------------|-------------|-------------|-------------|-------------|-------------|-------------|-------------|-------------|-------------|-------------|
| 537 | hsa-miR-454*    | 11.65634628 | 12.80019228 | 15.47981451 | 45.46244565 | 31.34628907 | 28.28789873 | 34.01285464 | 0.043561999 | 24.25318667 | 27.3844437  | 5.901853756 | 6.39779141  |
| 536 | hsa-miR-454     | 101.171341  | 75.51169464 | 82.91610797 | 128.3359949 | 364.5268172 | 312.7159432 | 362.0519756 | 330.8322862 | 14.93462356 | 19.06358217 | 0.019068314 | 3.028369621 |
| 535 | hsa-miR-453     | 3.068558668 | 15.61464501 | 11.18772438 | 42.70022493 | 30.42939884 | 26.89249241 | 19.18932208 | 4.590182433 | 152.3891944 | 134.2839792 | 125.3884777 | 125.8933279 |
| 534 | hsa-miR-452*    | 0.011784923 | 8.081118819 | 17.2095753  | 41.3037824  | 28.12855893 | 11.82510797 | 8.143833835 | 2.071456179 | 108.9633543 | 80.51668473 | 80.55158768 | 82.92222846 |
| 533 | hsa-miR-452     | 70.08985435 | 61.37429245 | 73.53197155 | 91.83785206 | 185.9177507 | 132.3990533 | 209.5633502 | 114.7038155 | 27.32457149 | 16.80355577 | 2.218596217 | 2.46711595  |
| 532 | hsa-miR-451     | 3.732347963 | 16.03334416 | 19.4394095  | 33.058326   | 94.60379019 | 63.95831129 | 46.68328368 | 42.07705876 | 22.31150093 | 24.23731466 | 14.73931902 | 7.093577504 |
| 531 | hsa-miR-450b-5p | 15.42670447 | 12.31394558 | 15.84287049 | 34.54402056 | 35.01078431 | 25.62354615 | 12.35928698 | 3.775073322 | 43.46538863 | 17.1924466  | 5.119413187 | 0.018422362 |
| 530 | hsa-miR-450b-3p | 0.012798038 | 10.77560365 | 9.836354242 | 41.77542998 | 24.5591932  | 20.91986054 | 16.44151948 | 0.048506609 | 57.81449393 | 48.25904758 | 29.72444861 | 37.04176318 |
| 529 | hsa-miR-450a    | 0.015465699 | 12.70510255 | 23.10046093 | 47.52752707 | 57.95781814 | 22.53153559 | 10.68723873 | 0.058558759 | 0.020255694 | 16.11727798 | 1.334401649 | 16.99819543 |
| 528 | hsa-miR-449b*   | 13.26093889 | 22.43270944 | 29.48557714 | 40.66753157 | 75.45882123 | 46.66807005 | 41.72915701 | 22.83821474 | 21.7283402  | 18.53742027 | 0.8680279   | 10.84363261 |
| 527 | hsa-miR-449b    | 1.695040569 | 8.653593673 | 11.3765612  | 35.26653742 | 48.52198001 | 21.20790296 | 7.262779001 | 2.619619533 | 56.13589784 | 26.69379853 | 13.83906707 | 17.61729845 |
| 526 | hsa-miR-449a    | 2.171194813 | 14.17200875 | 12.51159906 | 31.10490917 | 46.54443763 | 17.50605275 | 23.15738833 | 20.62642477 | 38.61090021 | 9.195571625 | 9.621263804 | 0.015271756 |
| 525 | hsa-miR-448     | 8.595759974 | 8.180619166 | 16.91738551 | 41.73637102 | 58.84693011 | 16.83823018 | 17.43917026 | 5.728728089 | 35.63522308 | 19.99031439 | 13.43550861 | 2.039549793 |
| 524 | hsa-miR-433     | 0.015350904 | 10.02287843 | 1.458526317 | 32.40119833 | 69.62333029 | 30.77907298 | 14.22461975 | 14.72400551 | 35.38564958 | 30.62136215 | 15.96787697 | 0.800285357 |
| 523 | hsa-miR-432*    | 11.90565893 | 14.12021251 | 33.92232573 | 31.82887609 | 36.48926265 | 19.98422829 | 15.54849429 | 2.826192877 | 14.98698472 | 7.125925846 | 9.659150662 | 5.860203554 |
| 522 | hsa-miR-432     | 16.01144192 | 10.76779197 | 36.51760428 | 46.27463719 | 28.13972862 | 6.073539541 | 19.17068774 | 0.04148327  | 16.43087604 | 0.022134849 | 5.780545989 | 2.804018141 |
| 521 | hsa-miR-431*    | 0.011176443 | 12.47824784 | 30.61591006 | 38.81714298 | 30.83384447 | 30.55185471 | 10.48651199 | 6.307113814 | 48.14866253 | 22.57063655 | 26.03130561 | 25.82220521 |
| 520 | hsa-miR-431     | 17.77618116 | 2.373381411 | 34.91485756 | 37.99439168 | 40.57583873 | 36.96419584 | 12.37473067 | 10.40252053 | 120.9501404 | 133.3245328 | 122.6850359 | 91.49453287 |
| 519 | hsa-miR-429     | 4.461618773 | 7.11768893  | 33.33708424 | 46.79028041 | 21.39297313 | 18.28689874 | 0.047335333 | 0.041387625 | 76.26030192 | 54.89193289 | 58.51293395 | 54.17304176 |
| 518 | hsa-miR-425*    | 32.9339469  | 25.89862161 | 43.73990839 | 58.65265976 | 32.38385685 | 23.12312887 | 18.32461315 | 29.10685757 | 46.57221093 | 15.74956598 | 30.67898788 | 11.9597053  |
| 517 | hsa-miR-425     | 110.9271806 | 173.6009653 | 195.7534667 | 135.8294378 | 136.8874042 | 156.2518217 | 161.4062194 | 113.4638367 | 749.2658061 | 684.1346156 | 703.0606324 | 716.3104415 |
| 516 | hsa-miR-424*    | 26.30476701 | 26.49688545 | 43.44215803 | 49.76439822 | 96.90046827 | 71.44804609 | 83.84696878 | 66.97078741 | 72.83327602 | 43.75293698 | 45.48315544 | 31.07636936 |
| 515 | hsa-miR-424     | 21.94929889 | 21.97335406 | 52.73806636 | 52.66051357 | 38.00631976 | 35.24152064 | 37.74172067 | 15.62949588 | 55.92102797 | 13.15565316 | 15.29051359 | 16.58944535 |
| 514 | hsa-miR-423-5p  | 450.9303333 | 457.535079  | 528.2344168 | 551.3619266 | 705.8084649 | 698.3571818 | 637.3842106 | 651.1080911 | 121.9585277 | 68.70731379 | 67.69598837 | 70.64908742 |
| 513 | hsa-miR-423-3p  | 15.02174415 | 19.2791542  | 36.2345649  | 45.4779366  | 40.40704376 | 41.01327029 | 24.42134641 | 25.75943148 | 42.73856424 | 16.15250682 | 5.510812227 | 16.41650649 |
| 512 | hsa-miR-422a    | 16.064238   | 11.71840271 | 32.29988812 | 41.92707471 | 30.74078363 | 29.87211943 | 20.19853883 | 0.039429053 | 40.23920402 | 11.39236297 | 0.051805891 | 17.72543846 |
| 511 | hsa-miR-421     | 36.57823013 | 31.93496079 | 54.44003903 | 66.54767681 | 130.3098864 | 104.8421815 | 111.8876612 | 79.83680294 | 34.99376752 | 0.020123702 | 0.018793934 | 12.56824418 |
| 510 | hsa-miR-412     | 5.272942586 | 5.231203054 | 34.80722987 | 39.47023577 | 42.26764929 | 23.87992308 | 12.32185296 | 15.59121632 | 27.3232994  | 9.89475158  | 1.346194912 | 11.11022206 |
| 509 | hsa-miR-411*    | 0.011400574 | 10.83762283 | 36.48828759 | 44.05745989 | 23.26328132 | 34.83874949 | 3.547179922 | 11.14304174 | 41.08515928 | 1.27665077  | 12.35253986 | 19.64223101 |
| 508 | hsa-miR-411     | 9.997596316 | 8.922148717 | 29.92734646 | 38.1059393  | 29.68274565 | 29.49594413 | 0.483716903 | 5.959975258 | 105.0684093 | 91.67880679 | 79.29845266 | 85.91226769 |
| 507 | hsa-miR-410     | 1.962251692 | 11.62791307 | 21.47279842 | 47.00188312 | 27.16609607 | 19.34518635 | 4.770397704 | 12.84377051 | 33.74457437 | 0.019108119 | 3.432751804 | 9.85603126  |
| 506 | hsa-miR-409-5p  | 1.775797576 | 8.190540836 | 32.76945911 | 40.04159808 | 28.01096417 | 26.72643401 | 12.75865308 | 22.42716542 | 45.96075189 | 3.000304229 | 11.20030758 | 24.05586517 |
| 505 | hsa-miR-409-3p  | 25.65992284 | 14.70911731 | 42.94915783 | 48.59749684 | 44.08647339 | 33.72717331 | 32.05000838 | 26.37435227 | 38.19846519 | 6.751196124 | 18.58047606 | 21.06040458 |
| 504 | hsa-miR-384     | 4.891711776 | 2.564560213 | 29.4410775  | 39.92270547 | 19.00869194 | 20.79071062 | 4.569963005 | 2.557025379 | 34.80077329 | 0.016355075 | 27.83620692 | 27.00707962 |
| 503 | hsa-miR-383     | 0.011586731 | 0.012104614 | 27.33642152 | 40.67432753 | 15.54540666 | 17.59322323 | 9.634199216 | 13.97136623 | 46.30166746 | 0.015989139 | 36.96462561 | 29.54976767 |
| 502 | hsa-miR-382     | 4.825609038 | 10.69460435 | 21.61500609 | 38.95577699 | 38.9837607  | 17.68703853 | 5.937421626 | 5.05287341  | 26.49105685 | 0.017410593 | 9.381762912 | 27.25302109 |
| 501 | hsa-miR-381     | 0.094990851 | 0.01297726  | 39.89098693 | 43.8440883  | 24.92551745 | 14.16125871 | 31.12054465 | 16.43503278 | 52.74637755 | 0.018641759 | 9.733111593 | 23.40414571 |
| 500 | hsa-miR-380*    | 0.48352405  | 0.012782825 | 23.66271571 | 39.75151373 | 28.33754665 | 17.1475685  | 5.964569381 | 7.882680315 | 88.99014946 | 2.140988691 | 21.5163379  | 26.23923542 |
| 499 | hsa-miR-380     | 0.013036721 | 1.438521614 | 28.26666007 | 41.13919995 | 39.02153115 | 17.31024575 | 5.956927327 | 15.06047486 | 48.31006544 | 8.298059315 | 33.32196303 | 36.09000847 |
| 498 | hsa-miR-379*    | 4.180712143 | 8.797224283 | 35.131843   | 44.47707271 | 50.82098319 | 25.08868363 | 4.731650773 | 18.72737522 | 258.5331627 | 167.5234441 | 201.5494741 | 185.0372072 |
| 497 | hsa-miR-379     | 0.162204353 | 16.48449759 | 29.90018793 | 42.65699217 | 70.22503441 | 13.70808952 | 30.94672304 | 14.57803532 | 69.82911407 | 0.017963732 | 20.94271632 | 29.14137322 |
| 496 | hsa-miR-378*    | 3.607435625 | 7.853154756 | 28.36350723 | 38.96036798 | 64.74275987 | 33.96778291 | 33.63883939 | 22.34995359 | 15.79429989 | 9.504020432 | 8.545725773 | 28.35322916 |
| 495 | hsa-miR-378     | 88.69226185 | 85.35737772 | 121.0237669 | 96.76355608 | 342.0740539 | 254.1222143 | 268.7414005 | 189.5915344 | 37.77382538 | 18.33632146 | 15.08221123 | 26.80239723 |
| 494 | hsa-miR-377*    | 0.015370639 | 1.376612791 | 23.97001651 | 27.39617811 | 58.98468155 | 19.67884916 | 3.436524761 | 8.879470142 | 22.38370227 | 6.784143544 | 17.25430445 | 23.16328995 |
| 493 | hsa-miR-377     | 0.012105266 | 12.84789819 | 33.68265361 | 28.25711693 | 24.79524641 | 21.47908019 | 18.35191862 | 32.64072595 | 23.32205075 | 14.9186996  | 34.54317867 | 33.81461373 |
| 492 | hsa-miR-376c    | 2.843018282 | 11.84051896 | 29.64410617 | 32.68844486 | 22.89935459 | 18.19514605 | 13.97634948 | 23.02724444 | 9.503780835 | 1.718831746 | 20.74693022 | 33.1040691  |
| 490 | hsa-miR-376a*   | 0.011707446 | 6.289369207 | 33.71355575 | 34.87063562 | 20.74121022 | 22.97179019 | 11.41722737 | 0.063145042 | 113.6371273 | 53.94685911 | 162.2490814 | 98.5539747  |

|     |                |             |             |              |             |             |             |             |             |             |             |             |             |
|-----|----------------|-------------|-------------|--------------|-------------|-------------|-------------|-------------|-------------|-------------|-------------|-------------|-------------|
| 489 | hsa-miR-376a   | 0.01173377  | 11.33921592 | 41.78342918  | 31.33485974 | 21.10551214 | 11.99434417 | 0.082606246 | 34.13695165 | 48.09308523 | 23.28266405 | 46.25769603 | 1.317106251 |
| 487 | hsa-miR-374b*  | 6.594299303 | 2.963820345 | 45.57263822  | 28.11525472 | 10.68873673 | 5.024297913 | 0.10988622  | 20.50181187 | 24.95291378 | 25.18108828 | 49.0756196  | 17.50456987 |
| 486 | hsa-miR-374b   | 95.71980476 | 88.6264128  | 122.6918769  | 111.6977841 | 119.9008916 | 94.72107946 | 139.4157972 | 93.85586377 | 21.10726997 | 34.5157659  | 27.51870218 | 15.21592692 |
| 484 | hsa-miR-374a   | 0.015508647 | 35.15746958 | 30.53133324  | 32.57846802 | 28.34748689 | 8.771231898 | 32.33861416 | 0.044888573 | 12.31818853 | 14.72123132 | 18.68041184 | 14.54220892 |
| 483 | hsa-miR-373*   | 23.79012001 | 45.18593905 | 51.41170902  | 44.2256655  | 25.90690385 | 22.45751262 | 29.48235339 | 16.14145511 | 114.3901394 | 119.5705136 | 118.124335  | 66.83933317 |
| 482 | hsa-miR-373    | 2.153544186 | 28.63271806 | 32.19721701  | 27.78032834 | 18.16024128 | 17.81409403 | 35.31695349 | 10.82436471 | 34.73655741 | 28.06989926 | 42.45778418 | 11.1781321  |
| 481 | hsa-miR-372    | 0.011963137 | 25.9107858  | 37.26982321  | 28.5023617  | 9.285589007 | 2.730836788 | 21.22306974 | 2.408086579 | 57.06314915 | 48.1168696  | 42.94801691 | 11.2467414  |
| 480 | hsa-miR-371-5p | 43.05157389 | 63.04022483 | 53.97947146  | 61.16477811 | 71.75531122 | 54.13127322 | 77.20228414 | 38.34623685 | 28.26054218 | 29.1700306  | 31.10857878 | 5.009616109 |
| 479 | hsa-miR-371-3p | 0.011532427 | 20.65859202 | 32.26054031  | 34.08633375 | 17.06050006 | 21.18292742 | 59.19061518 | 13.24301827 | 30.00028485 | 46.52579283 | 30.18319069 | 0.01556845  |
| 478 | hsa-miR-370    | 6.596066168 | 27.72417997 | 34.50264891  | 31.77077544 | 22.30138254 | 34.75570665 | 39.44233667 | 19.31481245 | 27.68823389 | 20.37116827 | 26.09252759 | 0.016467077 |
| 477 | hsa-miR-369-5p | 0.01170889  | 29.6524257  | 32.02485711  | 35.98753621 | 11.33962126 | 15.10808014 | 23.47097891 | 14.07114984 | 30.98668635 | 22.64673865 | 22.88415728 | 0.016644568 |
| 476 | hsa-miR-369-3p | 0.011892945 | 26.58965642 | 28.18142183  | 45.93846942 | 12.33884262 | 24.2435141  | 22.51574938 | 0.047993858 | 43.28708041 | 34.06020638 | 46.40234523 | 2.260091659 |
| 475 | hsa-miR-367*   | 17.21057249 | 21.83887914 | 30.52692752  | 37.32700064 | 12.52280313 | 23.29607014 | 41.12195118 | 9.677666639 | 86.44547067 | 94.11053951 | 89.2112977  | 44.4516173  |
| 474 | hsa-miR-367    | 0.78620447  | 29.70425445 | 32.66681991  | 34.56417106 | 12.98346827 | 4.678674764 | 31.38731168 | 2.935995941 | 24.8857723  | 12.86868561 | 22.86010178 | 6.432173935 |
| 473 | hsa-miR-365*   | 11.1089741  | 33.13828716 | 44.20765497  | 42.31714105 | 0.041531782 | 19.16517729 | 32.24436562 | 2.521609288 | 48.14039448 | 50.99120578 | 54.9909608  | 30.78950574 |
| 472 | hsa-miR-365    | 59.17735611 | 44.94396947 | 55.72690074  | 58.13052245 | 53.52641486 | 70.17751526 | 102.5379151 | 48.41270407 | 52.22425832 | 32.07009795 | 37.088677   | 25.34302417 |
| 470 | hsa-miR-363    | 4.129568975 | 14.2417723  | 25.96672898  | 37.97203729 | 12.75478191 | 19.80953703 | 22.99724417 | 0.04366651  | 785.7215212 | 864.141863  | 766.0838993 | 702.9663696 |
| 469 | hsa-miR-362-5p | 6.220354067 | 21.51034636 | 41.01809756  | 41.57236084 | 35.8747694  | 43.81272982 | 73.66556227 | 34.80086409 | 50.1626151  | 35.87752711 | 47.38504049 | 21.02076374 |
| 468 | hsa-miR-362-3p | 10.45457126 | 23.00846976 | 32.02424362  | 31.21878155 | 33.38494241 | 44.51810083 | 51.97673552 | 26.93551552 | 39.32636716 | 12.5204159  | 31.22983097 | 17.08988279 |
| 467 | hsa-miR-361-5p | 392.3417738 | 490.8935901 | 442.0860351  | 461.4708403 | 885.1479995 | 964.2616362 | 874.8472422 | 829.3189454 | 67.07169683 | 44.38465693 | 40.70750315 | 42.41530723 |
| 466 | hsa-miR-361-3p | 122.0076227 | 204.3388824 | 183.4493445  | 177.1727838 | 29.64595361 | 20.29640828 | 46.50572045 | 3.758094073 | 63.40017707 | 18.51731729 | 16.24218232 | 22.45917471 |
| 465 | hsa-miR-34c-5p | 0.12035613  | 16.35034035 | 27.24361278  | 29.1427612  | 13.68750378 | 29.40192149 | 34.18924961 | 10.54656291 | 70.70874015 | 17.33320847 | 33.96276563 | 29.94698073 |
| 464 | hsa-miR-34c-3p | 17.65863963 | 27.7631216  | 30.52094842  | 38.1187342  | 39.58625625 | 40.90749878 | 45.12974209 | 26.2705072  | 75.14499086 | 31.50724116 | 50.44477466 | 35.68801975 |
| 463 | hsa-miR-34b*   | 0.01580586  | 16.24297058 | 23.6655861   | 27.07874019 | 19.08812958 | 29.3611644  | 43.02219956 | 6.525915246 | 181.2959091 | 71.78921965 | 102.4941942 | 81.95238466 |
| 462 | hsa-miR-34b    | 6.527758472 | 23.90378844 | 32.4242071   | 33.53805429 | 47.13531377 | 29.6413418  | 43.8182702  | 29.51586201 | 89.81087516 | 34.51349482 | 47.82893978 | 35.71821823 |
| 461 | hsa-miR-34a*   | 7.410648453 | 27.84416067 | 33.730818767 | 39.09486917 | 20.4726123  | 22.0697748  | 30.12803268 | 20.36868562 | 58.18242181 | 47.06903994 | 51.7952747  | 40.28644567 |
| 460 | hsa-miR-34a    | 28.87408458 | 49.1773268  | 69.81631571  | 76.83766084 | 230.0797519 | 103.5699474 | 169.4021877 | 105.2834438 | 84.55299181 | 31.28230203 | 36.93681754 | 36.31825256 |
| 459 | hsa-miR-346    | 0.015338125 | 26.00331073 | 32.04856401  | 40.36533968 | 56.7082319  | 47.11258403 | 43.5258521  | 23.84719993 | 166.5432364 | 103.3239302 | 123.1832315 | 132.5630916 |
| 458 | hsa-miR-345    | 5.970735901 | 23.00273629 | 40.71418127  | 41.93674148 | 50.10287363 | 61.42377527 | 58.66426503 | 63.03416111 | 21.12682683 | 35.8441562  | 18.17070762 | 0.01508504  |
| 457 | hsa-miR-342-5p | 0.015325659 | 31.09675384 | 35.4521453   | 34.78088155 | 60.52355885 | 36.10098162 | 37.2573569  | 29.52690293 | 17.99424206 | 25.29839482 | 12.68247629 | 3.803760453 |
| 456 | hsa-miR-342-3p | 82.07572618 | 59.10522809 | 72.78041504  | 83.19932795 | 204.695925  | 137.4599422 | 141.3947149 | 144.5247313 | 54.27689941 | 66.13180891 | 57.80575211 | 29.37600653 |
| 455 | hsa-miR-340*   | 9.572937954 | 24.06543076 | 35.24568092  | 44.22021871 | 26.99440312 | 37.90346291 | 15.41826627 | 0.046222321 | 21.09388755 | 36.24227187 | 19.91235876 | 1.594747536 |
| 454 | hsa-miR-340    | 13.82193879 | 20.84828594 | 24.6118196   | 41.92954183 | 23.37827313 | 33.93970085 | 12.13730467 | 0.04233399  | 23.5187588  | 5.404007537 | 16.35897442 | 3.756613072 |
| 453 | hsa-miR-33b*   | 40.13736789 | 43.36402516 | 47.31711738  | 53.3115178  | 57.18889079 | 54.28003348 | 36.64092517 | 17.743877   | 37.6330429  | 21.6311563  | 12.47803531 | 7.827410794 |
| 452 | hsa-miR-33b    | 10.94338334 | 21.20127779 | 25.23491403  | 45.6207181  | 8.408198311 | 31.26926074 | 20.41926046 | 2.390318362 | 37.46276017 | 52.40334497 | 31.18744326 | 8.436390067 |
| 451 | hsa-miR-33a*   | 24.3232328  | 23.01287145 | 30.79189158  | 41.30126768 | 6.596722996 | 30.53519723 | 2.395769492 | 2.44217767  | 54.38852303 | 57.8848076  | 32.04141405 | 15.28572119 |
| 450 | hsa-miR-33a    | 14.41358835 | 16.30955544 | 33.75878537  | 40.09931373 | 13.43701364 | 33.37864747 | 20.4476122  | 0.041541822 | 30.40808773 | 42.93574961 | 11.26297958 | 0.016278046 |
| 449 | hsa-miR-339-5p | 16.97209767 | 22.00797088 | 28.47888742  | 43.01922264 | 24.87858208 | 40.85226685 | 27.34125854 | 6.480490532 | 15.20720447 | 38.45322229 | 6.107024584 | 0.016099557 |
| 448 | hsa-miR-339-3p | 14.01334817 | 23.5496874  | 34.64155873  | 46.45552994 | 41.73322614 | 56.29093137 | 37.6541152  | 17.23590873 | 35.01978237 | 36.22982768 | 8.685782188 | 0.017021095 |
| 447 | hsa-miR-338-5p | 10.86749389 | 19.22439213 | 34.88288979  | 50.02757694 | 21.85104451 | 34.16291442 | 13.47422868 | 1.342620234 | 29.42792469 | 31.40951772 | 1.818365513 | 1.977691761 |
| 446 | hsa-miR-338-3p | 14.46175366 | 21.86845146 | 22.52416542  | 57.21419192 | 11.14516237 | 27.78316653 | 0.051006693 | 0.050043889 | 34.4522647  | 45.16469234 | 17.65046449 | 14.00552509 |
| 445 | hsa-miR-337-5p | 20.29347029 | 22.9925298  | 36.08219802  | 56.26826712 | 32.94066864 | 33.88549507 | 20.74568754 | 6.778404634 | 88.2543582  | 69.0859061  | 29.14678284 | 38.58733932 |
| 444 | hsa-miR-337-3p | 7.423199515 | 19.2637246  | 21.1572242   | 45.65391988 | 36.03860887 | 25.00027206 | 26.26490132 | 0.043985929 | 39.83858179 | 43.32985492 | 18.02288905 | 1.271455347 |
| 443 | hsa-miR-335*   | 14.26310581 | 22.35381131 | 36.58501436  | 51.13899872 | 55.02331952 | 43.88083686 | 33.48890016 | 4.367631076 | 52.00569952 | 53.19213697 | 26.77952502 | 27.51333476 |
| 442 | hsa-miR-335    | 46.61758723 | 36.52048436 | 56.37779518  | 80.41627154 | 88.14919333 | 81.03775465 | 56.12091315 | 53.03783597 | 43.85386076 | 31.70372654 | 17.11435696 | 21.41020771 |
| 441 | hsa-miR-331-5p | 1.503182472 | 20.90978117 | 30.51957823  | 56.56530444 | 43.12873619 | 45.8015658  | 16.96247888 | 0.043286221 | 42.46574132 | 35.25077759 | 34.23338353 | 18.00636491 |
| 440 | hsa-miR-331-3p | 10.54295031 | 33.0354425  | 41.65269897  | 62.22150969 | 76.9864939  | 87.02774699 | 50.67371908 | 30.56285643 | 38.7082383  | 32.02024537 | 20.39317529 | 26.05673072 |

|     |                |             |             |             |             |             |             |             |             |             |             |             |             |
|-----|----------------|-------------|-------------|-------------|-------------|-------------|-------------|-------------|-------------|-------------|-------------|-------------|-------------|
| 439 | hsa-miR-330-5p | 0.011240299 | 11.73488954 | 28.45563543 | 41.28548579 | 37.4549289  | 36.60473687 | 26.07039506 | 14.96994797 | 38.62181662 | 34.82875688 | 21.74391017 | 21.81237095 |
| 438 | hsa-miR-330-3p | 10.09848572 | 19.22690083 | 36.45972122 | 47.92944847 | 45.16806141 | 60.29575372 | 63.31979161 | 15.96140107 | 49.10990789 | 31.61957979 | 28.39696196 | 30.37272375 |
| 437 | hsa-miR-329    | 386.0167872 | 401.6200152 | 505.0535552 | 482.6464843 | 36.04993509 | 56.88937692 | 34.04394849 | 12.2724284  | 28.18127997 | 29.86123717 | 19.18558101 | 15.03468107 |
| 436 | hsa-miR-328    | 0.01135845  | 23.78703946 | 30.91054304 | 53.60023387 | 42.44301768 | 46.89396733 | 42.02370482 | 10.29807335 | 160.4761494 | 111.7281421 | 118.4049841 | 117.9531216 |
| 435 | hsa-miR-326    | 4.777814679 | 17.54393564 | 36.91172845 | 47.14216627 | 48.23818596 | 54.14819753 | 68.7766643  | 12.98580994 | 75.65499802 | 55.79382168 | 30.90265319 | 41.16183895 |
| 434 | hsa-miR-325    | 0.011948448 | 6.937658954 | 18.60440441 | 41.04557305 | 35.48409017 | 41.52516358 | 38.36459234 | 4.511526459 | 78.96743101 | 39.36846245 | 25.33557268 | 40.75000786 |
| 433 | hsa-miR-324-5p | 26.18396851 | 41.48415503 | 50.03965738 | 69.33640169 | 190.0600927 | 176.4536563 | 209.7279936 | 145.0736628 | 79.03480875 | 31.77720791 | 19.4814164  | 22.04864741 |
| 432 | hsa-miR-324-3p | 10.66730819 | 28.15970814 | 39.92534842 | 52.21083001 | 65.77321191 | 42.55593766 | 34.81452277 | 19.6609525  | 1729.868444 | 1683.19578  | 1563.208747 | 1592.705783 |
| 431 | hsa-miR-323-5p | 11.279276   | 23.17393992 | 26.43282317 | 41.0446108  | 59.31341283 | 47.97486431 | 28.61928359 | 13.16920319 | 3610.602483 | 3404.789571 | 3208.274726 | 3168.646681 |
| 430 | hsa-miR-323-3p | 0.019189689 | 15.46726862 | 22.24828714 | 47.23613125 | 111.0292471 | 45.05999247 | 19.25844257 | 7.381090074 | 2942.640387 | 2795.250194 | 2469.815576 | 2564.468466 |
| 429 | hsa-miR-320d   | 774.301643  | 807.0876928 | 875.0110868 | 968.3850106 | 1435.408536 | 1363.107886 | 1223.935571 | 1136.118941 | 2961.352433 | 2982.694573 | 3065.939347 | 2948.721774 |
| 428 | hsa-miR-320c   | 2717.05159  | 2868.284997 | 2978.733691 | 3386.283532 | 2693.998455 | 2591.072012 | 2327.562088 | 2088.979356 | 40.35039218 | 32.05673568 | 0.034755009 | 0.015658773 |
| 427 | hsa-miR-320b   | 2169.405329 | 2405.378524 | 2465.911475 | 2808.442844 | 2138.836009 | 2005.516807 | 1748.39455  | 1721.771559 | 40.65357363 | 19.86136208 | 5.074021946 | 0.016800889 |
| 426 | hsa-miR-320a   | 2547.703216 | 2838.942733 | 2961.385753 | 3273.829564 | 2300.27823  | 2499.98252  | 2253.406876 | 2051.586693 | 50.40743553 | 52.1799091  | 36.90647498 | 30.30220966 |
| 425 | hsa-miR-32*    | 7.734701246 | 34.90988123 | 63.50955589 | 40.46540606 | 27.11080163 | 22.28329734 | 0.124211597 | 0.048259924 | 1985.07537  | 2103.19063  | 1949.26042  | 1989.980344 |
| 424 | hsa-miR-32     | 12.72440503 | 20.53956724 | 52.62986653 | 32.70630426 | 31.45134377 | 16.41649407 | 0.054779027 | 4.648760121 | 182.5340939 | 183.7014068 | 173.6232787 | 158.674961  |
| 423 | hsa-miR-31*    | 4.115223796 | 21.3010536  | 45.04517977 | 27.51660804 | 63.2935408  | 81.54516992 | 38.16502199 | 41.10702072 | 163.8937643 | 166.2645266 | 143.8588913 | 99.49592685 |
| 422 | hsa-miR-31     | 647.1704831 | 737.4491165 | 781.0442954 | 676.721051  | 1927.99396  | 1927.138963 | 1688.645178 | 1854.93894  | 33.82143059 | 26.70293313 | 8.418193208 | 9.164499096 |
| 421 | hsa-miR-30e*   | 35.98438462 | 47.22687346 | 78.40143792 | 72.32969353 | 189.1677632 | 159.3825506 | 166.100627  | 159.0225041 | 295.813072  | 276.8991413 | 292.6703299 | 211.4676836 |
| 420 | hsa-miR-30e    | 56.01135564 | 72.439924   | 90.71543801 | 74.48698612 | 170.9566675 | 152.7642745 | 143.1304712 | 121.2269433 | 60.35110409 | 52.99343137 | 34.2514628  | 33.67938294 |
| 419 | hsa-miR-30d*   | 4.734847139 | 18.01938801 | 43.48403754 | 37.20438394 | 35.55507341 | 19.24498295 | 6.992503483 | 18.30468861 | 49.44196225 | 25.58639208 | 9.820608951 | 10.00247131 |
| 418 | hsa-miR-30d    | 270.6973989 | 335.7077736 | 390.8730428 | 254.1730451 | 396.6785311 | 397.6376598 | 374.2127223 | 338.1779498 | 1506.337647 | 1486.434486 | 1554.861273 | 1376.219185 |
| 417 | hsa-miR-30c-2* | 16.85816449 | 27.36304772 | 41.69745442 | 43.13883042 | 76.52946065 | 41.73607055 | 39.14787155 | 35.31689744 | 47.64252121 | 23.67050037 | 11.08604866 | 18.93552684 |
| 416 | hsa-miR-30c-1* | 18.4625115  | 24.71527186 | 53.55176864 | 43.69528187 | 48.44301924 | 19.44186739 | 0.046733715 | 22.362952   | 1141.361273 | 984.0180918 | 964.1022414 | 873.0367271 |
| 415 | hsa-miR-30c    | 678.9153255 | 737.2435624 | 788.7400588 | 779.6123915 | 1428.624515 | 1304.196406 | 1358.246034 | 1300.531162 | 358.2560321 | 369.4790665 | 328.9118329 | 307.1635217 |
| 414 | hsa-miR-30b*   | 12.26935126 | 16.92911791 | 46.94591188 | 35.22002291 | 45.73051019 | 26.4768737  | 15.71381719 | 25.9962742  | 594.4116112 | 670.7129299 | 570.967297  | 465.1053689 |
| 413 | hsa-miR-30b    | 495.0287421 | 470.9609339 | 514.2394581 | 491.1973896 | 993.232596  | 818.1616842 | 780.1105123 | 724.9038565 | 48.98858272 | 31.10297192 | 5.646622989 | 30.49844188 |
| 412 | hsa-miR-30a*   | 131.9657298 | 156.5623644 | 172.6081153 | 141.3666773 | 365.3831239 | 362.0820288 | 339.1993828 | 306.0078632 | 41.0540138  | 36.6965664  | 7.928849268 | 23.4472505  |
| 411 | hsa-miR-30a    | 354.4364259 | 475.4657454 | 439.6336925 | 329.6960661 | 688.749923  | 785.2056285 | 630.0738963 | 545.9071538 | 42.86680532 | 35.88065391 | 16.50430041 | 24.86183665 |
| 410 | hsa-miR-302f   | 590.5846012 | 672.4963186 | 825.6265856 | 699.1922301 | 33.41659508 | 8.72092762  | 8.757570488 | 20.98000186 | 39.52261366 | 24.73537739 | 6.20157071  | 28.03362598 |
| 409 | hsa-miR-302e   | 2.670210529 | 15.60280798 | 32.26176226 | 36.22224763 | 38.3050025  | 22.53615411 | 8.224432574 | 27.23174025 | 51.94163609 | 32.20380364 | 19.66356138 | 27.08599327 |
| 408 | hsa-miR-302d*  | 1.317122427 | 11.70799533 | 44.06596455 | 42.47828861 | 32.34718815 | 28.5419851  | 5.749222607 | 26.68739865 | 41.85258926 | 33.11420963 | 2.229605959 | 25.24358706 |
| 407 | hsa-miR-302d   | 0.011831443 | 0.012475115 | 49.37106317 | 33.65895606 | 28.58489631 | 7.153773087 | 18.61673668 | 27.18234772 | 46.77408915 | 7.766373913 | 0.019455649 | 21.38993396 |
| 406 | hsa-miR-302c*  | 7.98054349  | 16.16265444 | 45.89550592 | 39.95722758 | 45.07856849 | 16.1018413  | 9.831782863 | 35.56785156 | 57.71859203 | 0.018387615 | 3.289959936 | 26.33785908 |
| 405 | hsa-miR-302c   | 0.011990026 | 17.52448525 | 47.04570386 | 37.81688667 | 38.81597673 | 18.36869476 | 7.913329617 | 26.01043933 | 41.63897193 | 0.018356799 | 9.084798539 | 26.36229928 |
| 404 | hsa-miR-302b*  | 1.870383066 | 3.79156978  | 36.93399038 | 28.57288946 | 46.74598227 | 2.176448588 | 16.1773722  | 21.8253447  | 83.22315082 | 13.13845457 | 6.166293499 | 33.42355602 |
| 403 | hsa-miR-302b   | 2.034191735 | 23.44805161 | 45.01344102 | 35.34605036 | 39.50667431 | 10.16697832 | 0.113507903 | 21.26290598 | 65.2229222  | 2.27835384  | 21.20762994 | 31.41436039 |
| 402 | hsa-miR-302a*  | 0.582585977 | 12.77385316 | 47.86266548 | 35.05073339 | 39.61380238 | 22.11451802 | 12.72937555 | 26.29419041 | 165.3388228 | 51.92905082 | 57.96984322 | 95.28877142 |
| 401 | hsa-miR-302a   | 0.015338977 | 15.74960485 | 39.77174744 | 28.93751247 | 58.82359136 | 19.05590128 | 4.590640674 | 30.31734162 | 37.86756732 | 12.61940334 | 19.5417508  | 34.51691463 |
| 400 | hsa-miR-301b   | 1.94339433  | 8.881867921 | 50.10689471 | 33.39328043 | 85.93894084 | 11.65574933 | 1.786871896 | 27.87692156 | 45.76066499 | 6.908591017 | 3.588838087 | 32.70364376 |
| 399 | hsa-miR-301a   | 20.07902215 | 17.8729812  | 52.1241368  | 49.25801879 | 194.8458052 | 85.40135597 | 63.91476666 | 85.96082351 | 107.9875887 | 24.52059897 | 39.0011261  | 46.97501239 |
| 398 | hsa-miR-300    | 2.87113824  | 12.75275271 | 31.50924939 | 29.37326515 | 63.28305672 | 26.3954775  | 16.71055836 | 37.13349774 | 36.82888756 | 24.44043207 | 22.22973434 | 27.1605533  |
| 397 | hsa-miR-29c*   | 0.015346253 | 11.28368002 | 38.55360468 | 29.20137021 | 78.2880595  | 20.70323574 | 9.269990755 | 33.68215279 | 88.33955732 | 66.9512305  | 123.4307583 | 90.96416319 |
| 396 | hsa-miR-29c    | 31.45142303 | 33.13643463 | 64.07108103 | 41.32171497 | 100.0366633 | 25.99589008 | 45.28539667 | 33.03310812 | 49.50374555 | 18.43408897 | 49.00835759 | 32.09134506 |
| 395 | hsa-miR-29b-2* | 15.26396363 | 8.243985553 | 44.61008895 | 40.78516037 | 24.56434748 | 40.34031965 | 3.406723464 | 31.74593955 | 24.51212423 | 6.612134965 | 28.92381355 | 27.15235849 |
| 394 | hsa-miR-29b-1* | 38.73346738 | 39.5299506  | 76.61349122 | 72.53940463 | 128.6019096 | 97.67399369 | 200.3170095 | 106.1022138 | 1402.02942  | 1173.498227 | 1411.068973 | 1175.557567 |
| 393 | hsa-miR-29b    | 12.4083423  | 23.05157219 | 59.44948033 | 49.2355393  | 24.29447432 | 32.79104283 | 36.5035002  | 28.69323701 | 69.06186386 | 46.11194807 | 63.64350819 | 66.46888595 |

|     |                  |             |             |             |             |              |             |             |             |             |             |             |             |
|-----|------------------|-------------|-------------|-------------|-------------|--------------|-------------|-------------|-------------|-------------|-------------|-------------|-------------|
| 392 | hsa-miR-29a*     | 1.599392393 | 14.02055244 | 43.91818563 | 45.92867407 | 31.75685677  | 22.40284552 | 4.067909515 | 24.69970903 | 44.57678554 | 5.261591186 | 25.87819685 | 24.06994703 |
| 391 | hsa-miR-29a      | 971.9109884 | 878.4101597 | 1233.800426 | 890.1460822 | 1252.614994  | 1102.672213 | 1236.280887 | 1080.30424  | 41.72334478 | 12.09169444 | 26.91166382 | 38.73759352 |
| 390 | hsa-miR-299-5p   | 11.91509662 | 20.31752641 | 40.20027012 | 48.10042928 | 83.51913925  | 77.5750288  | 72.08364551 | 70.24866096 | 2.526305215 | 24.58920567 | 28.60520312 | 0.014777131 |
| 389 | hsa-miR-299-3p   | 9.966331686 | 12.28750759 | 37.79799904 | 39.28997983 | 35.59381451  | 40.22766633 | 8.556159201 | 27.78906645 | 105.1094681 | 96.99146473 | 100.5755186 | 55.93788713 |
| 388 | hsa-miR-298      | 1.433516292 | 17.14276084 | 39.60158208 | 47.95211979 | 34.37913437  | 22.03689554 | 15.17468581 | 24.08292339 | 26.23579579 | 30.73841862 | 46.26305658 | 13.46035711 |
| 387 | hsa-miR-297      | 8.751391701 | 25.70840825 | 44.41374304 | 15.9746929  | 41.76535757  | 1.780305262 | 17.4946414  | 0.04464379  | 86.51428426 | 83.63950646 | 81.97599794 | 59.89965024 |
| 386 | hsa-miR-296-5p   | 58.05527125 | 56.85060874 | 62.7416374  | 49.88829021 | 80.38328631  | 72.23316211 | 83.62793466 | 54.61636542 | 89.17349328 | 81.63720901 | 77.75575665 | 66.72190588 |
| 385 | hsa-miR-296-3p   | 16.75777673 | 35.02228646 | 52.46390244 | 29.41727726 | 22.36079654  | 19.24779445 | 26.32623809 | 12.24335007 | 139.5648719 | 162.0540081 | 152.9476652 | 131.2507625 |
| 384 | hsa-miR-28-5p    | 39.14208285 | 50.80738566 | 69.23949047 | 37.94624235 | 105.6178998  | 99.31447627 | 102.0631126 | 75.26257825 | 1534.833774 | 1608.8715   | 1511.48575  | 1436.675111 |
| 383 | hsa-miR-28-3p    | 37.8065148  | 45.31060501 | 60.60861158 | 38.50473232 | 122.4128545  | 97.40366567 | 121.1259534 | 72.47535484 | 39.37855324 | 52.36063144 | 45.59933862 | 17.32775733 |
| 382 | hsa-miR-27b*     | 25.22391356 | 43.27192861 | 55.26696525 | 31.10134779 | 208.257663   | 183.3694845 | 205.1527464 | 153.3914914 | 2290.765453 | 2465.353662 | 2315.885423 | 2254.674654 |
| 381 | hsa-miR-27b      | 936.1126    | 1024.534603 | 981.853872  | 1058.52023  | 1440.492351  | 1495.845007 | 1438.483828 | 1360.413894 | 11.56733941 | 26.68141432 | 15.33737756 | 1.435971673 |
| 380 | hsa-miR-27a*     | 4.759375861 | 33.16514307 | 41.33336104 | 14.00697412 | 51.46134957  | 27.3529579  | 35.9331457  | 18.15871664 | 1090.928502 | 801.9265047 | 950.9424017 | 847.3696854 |
| 379 | hsa-miR-27a      | 1593.957491 | 2008.887795 | 1884.838135 | 1852.817285 | 2247.120034  | 2337.640314 | 2308.865951 | 2208.684513 | 30.50676936 | 24.08028632 | 14.91166678 | 3.680222539 |
| 378 | hsa-miR-26b*     | 1.592468031 | 25.43118943 | 44.74789654 | 22.60764124 | 14.98088036  | 17.11410636 | 28.74464137 | 10.9640264  | 12.96570813 | 8.939076712 | 14.65855096 | 19.47279222 |
| 377 | hsa-miR-26b      | 781.764197  | 575.7131066 | 712.3123898 | 746.9318036 | 1067.987529  | 715.8121258 | 871.2729375 | 841.1162454 | 2145.483797 | 1895.530064 | 2010.099461 | 1759.535959 |
| 376 | hsa-miR-26a-2*   | 0.015620413 | 26.1826888  | 40.64468185 | 25.14936906 | 45.64814699  | 17.89816511 | 21.73684588 | 6.204194339 | 87.83382417 | 87.62861965 | 71.54981275 | 76.81624346 |
| 375 | hsa-miR-26a-1*   | 0.012076505 | 24.53839258 | 48.21167856 | 19.67425618 | 19.02931834  | 10.29324964 | 15.76667469 | 3.4223444   | 1856.426529 | 1832.022418 | 1858.212358 | 1809.625873 |
| 374 | hsa-miR-26a      | 1891.480388 | 1829.902034 | 1999.816042 | 1798.213334 | 2006.457033  | 1700.183422 | 1782.331542 | 1736.487516 | 160.9015502 | 153.0703949 | 154.7400833 | 158.9773505 |
| 373 | hsa-miR-25*      | 3.281921444 | 19.26623919 | 54.07791814 | 28.91299682 | 124.6600203  | 100.0445086 | 127.7194216 | 99.19147322 | 21.522202   | 19.18677918 | 28.44226082 | 18.74350814 |
| 372 | hsa-miR-25       | 906.9215145 | 937.8665614 | 983.5774368 | 1074.520141 | 1714.521108  | 1600.620172 | 1664.282781 | 1590.495908 | 3581.352445 | 3838.048332 | 3925.35279  | 3811.090165 |
| 371 | hsa-miR-24-2*    | 64.63453201 | 87.0491412  | 113.0271843 | 87.55352195 | 171.3550891  | 173.3977396 | 198.3796404 | 171.8853323 | 38.27218887 | 37.55309544 | 36.46193985 | 22.07931937 |
| 370 | hsa-miR-24-1*    | 0.328956596 | 32.16085205 | 43.85708092 | 26.84414072 | 30.54363415  | 18.6909488  | 21.08812714 | 12.65804613 | 9080.224322 | 9659.393132 | 9666.849296 | 9713.425391 |
| 369 | hsa-miR-24       | 2027.235687 | 2473.400965 | 2719.644627 | 2596.617473 | 3567.215789  | 3592.958355 | 3666.568668 | 3423.868334 | 333.1819532 | 231.0658029 | 238.3080565 | 244.9914815 |
| 368 | hsa-miR-23b*     | 107.1539965 | 166.6634607 | 195.4860903 | 160.2471638 | 40.03761784  | 31.85719827 | 42.35956873 | 16.59889705 | 11537.05122 | 12545.47222 | 12553.6925  | 12698.4413  |
| 367 | hsa-miR-23b      | 7155.143809 | 8569.237348 | 8872.942666 | 9022.330806 | 8480.467263  | 8643.6739   | 8708.456964 | 8341.446611 | 77.02368473 | 45.47652499 | 43.04722171 | 43.4488267  |
| 366 | hsa-miR-23a*     | 272.1110168 | 326.2363785 | 365.1095471 | 278.9251646 | 276.3601892  | 227.2794441 | 247.4114074 | 209.4929373 | 4680.510569 | 1582.865501 | 1826.376841 | 1729.840123 |
| 365 | hsa-miR-23a      | 8809.774928 | 10626.22958 | 11222.03923 | 11483.30197 | 11361.89518  | 11805.3735  | 11701.57512 | 11394.84853 | 57.82736938 | 22.4005277  | 32.07458075 | 30.76743365 |
| 364 | hsa-miR-224*     | 21.13623016 | 49.17776746 | 64.53497814 | 46.13199214 | 67.99816023  | 42.45632757 | 55.10978252 | 39.7950935  | 48.65862559 | 32.09832364 | 37.32766251 | 37.42247179 |
| 363 | hsa-miR-224      | 1600.452518 | 622.5040663 | 751.576481  | 729.2989745 | 5107.459796  | 1418.482459 | 1673.501832 | 1496.737666 | 34.92672721 | 26.53290974 | 36.28601704 | 21.63892402 |
| 362 | hsa-miR-223*     | 0.015508707 | 20.83353814 | 35.68060726 | 20.34597213 | 44.54843069  | 18.08202336 | 22.92778459 | 22.98893652 | 1177.694417 | 1193.633757 | 1233.409963 | 1254.318555 |
| 361 | hsa-miR-223      | 9.880809457 | 24.19177421 | 49.74842163 | 34.52263754 | 62.83932123  | 46.83552367 | 50.06525945 | 32.47912339 | 40.26309854 | 20.6086838  | 26.18360083 | 24.90457677 |
| 360 | hsa-miR-222*     | 12.60240286 | 31.87996564 | 40.86284346 | 32.33015545 | 49.51243437  | 23.87096945 | 37.8875826  | 16.64164536 | 783.0478039 | 844.7935429 | 865.2087965 | 690.6499823 |
| 359 | hsa-miR-222      | 485.0616115 | 581.9792732 | 595.119579  | 627.3956457 | 1095.630912  | 1028.259926 | 1022.645744 | 1025.376213 | 20.23047945 | 42.32238507 | 23.57180575 | 1.357738018 |
| 358 | hsa-miR-221*     | 0.015581262 | 25.34035684 | 42.27297616 | 22.2317292  | 44.03053853  | 23.47369731 | 40.60633552 | 28.7396083  | 43.68005151 | 41.3756175  | 30.17985805 | 6.549880374 |
| 357 | hsa-miR-221      | 427.8367843 | 473.2764622 | 497.3305533 | 456.2220574 | 882.4638456  | 884.9060811 | 901.0393784 | 733.1033085 | 37.0350618  | 46.0308179  | 29.24871891 | 13.56330019 |
| 356 | hsa-miR-220c     | 18.8886623  | 26.93625578 | 17.66556367 | 45.90519228 | 22.99492132  | 25.26850433 | 18.10118122 | 0.042705401 | 53.64857671 | 61.68861494 | 49.70476634 | 29.72232304 |
| 355 | hsa-miR-220b     | 16.01445003 | 32.96071634 | 22.41677474 | 44.21215073 | 38.76715691  | 37.43646681 | 27.44182844 | 15.71993258 | 132.8103067 | 190.8356662 | 183.4444953 | 117.7402138 |
| 354 | hsa-miR-220a     | 25.91058887 | 37.41172095 | 19.77095526 | 48.48967712 | 50.25838397  | 60.13577146 | 35.98092654 | 11.90250948 | 31.96581651 | 20.24249217 | 10.12069435 | 0.08151875  |
| 353 | hsa-miR-22*      | 33.10953348 | 47.48519153 | 37.83508186 | 59.76933902 | 171.21110869 | 64.43717421 | 47.63315368 | 49.62959773 | 41.17916076 | 34.55157385 | 24.48906808 | 0.015181443 |
| 352 | hsa-miR-22       | 98.60993508 | 144.1624064 | 119.4640521 | 125.7021224 | 147.4713669  | 220.1516907 | 195.5492193 | 140.3000694 | 39.19982406 | 53.12286385 | 27.5933112  | 3.293154895 |
| 351 | hsa-miR-219-5p   | 22.79623958 | 35.29098508 | 24.54753745 | 58.2341838  | 22.80423689  | 37.50231103 | 17.69544638 | 0.046155413 | 54.5639446  | 41.71084738 | 35.42863539 | 8.522107917 |
| 350 | hsa-miR-219-2-3p | 11.00807908 | 35.32635001 | 18.53605991 | 57.05383369 | 23.59258446  | 38.33973882 | 12.88863065 | 0.046692537 | 40.61512285 | 42.43987536 | 29.38018609 | 4.77884022  |
| 349 | hsa-miR-219-1-3p | 18.81945444 | 33.39423451 | 20.26325031 | 48.23523483 | 28.60557394  | 18.79812938 | 34.22053128 | 4.870958026 | 41.48259916 | 37.06196787 | 5.53366842  | 1.960261894 |
| 348 | hsa-miR-218-2*   | 27.09271403 | 36.00422478 | 28.26058184 | 62.9707302  | 32.74225231  | 41.50903313 | 28.7342321  | 2.238158682 | 39.36999155 | 25.06716158 | 3.86636684  | 3.112104874 |
| 347 | hsa-miR-218-1*   | 12.78089273 | 30.89008463 | 21.45252393 | 58.32631949 | 27.02393475  | 39.86803465 | 33.2376581  | 0.042095747 | 39.54612015 | 39.27408571 | 4.255292972 | 0.015784002 |
| 346 | hsa-miR-218      | 20.13380416 | 24.14192437 | 19.64117012 | 64.25736911 | 21.09598753  | 26.76847936 | 37.38039596 | 0.045002907 | 27.6708812  | 21.11884729 | 2.544676934 | 0.016706096 |



|     |                 |             |             |             |             |             |             |             |             |             |             |             |             |
|-----|-----------------|-------------|-------------|-------------|-------------|-------------|-------------|-------------|-------------|-------------|-------------|-------------|-------------|
| 345 | hsa-miR-217     | 16.48694577 | 29.84980518 | 19.67015486 | 42.1646898  | 30.69750437 | 25.52732088 | 29.03890158 | 4.867126942 | 51.26828069 | 25.38715237 | 10.99967497 | 16.53403891 |
| 344 | hsa-miR-216b    | 18.23363927 | 29.6075252  | 21.16329039 | 58.9384256  | 23.46536056 | 36.95426806 | 40.96522419 | 0.0489034   | 44.210737   | 30.52433064 | 7.297967096 | 11.69330037 |
| 343 | hsa-miR-216a    | 10.87581897 | 25.49161125 | 19.83071469 | 51.52137974 | 17.28590907 | 34.09922469 | 35.34800316 | 0.052220008 | 39.81483276 | 38.86029281 | 28.65529012 | 31.58647538 |
| 342 | hsa-miR-215     | 12.76977991 | 24.08489645 | 27.30638341 | 53.00626166 | 27.44247702 | 38.09501381 | 14.3561935  | 12.95702713 | 112.0044446 | 104.3469135 | 113.1835499 | 100.3375797 |
| 341 | hsa-miR-214*    | 4.877717043 | 25.17823118 | 15.91075294 | 44.57530654 | 26.20843659 | 34.03016313 | 16.43935859 | 4.858513798 | 42.03713903 | 12.99179851 | 11.83230179 | 9.637238581 |
| 340 | hsa-miR-214     | 26.07457141 | 36.1302382  | 33.94434452 | 66.16317789 | 49.27192554 | 55.40421721 | 38.27594596 | 34.95416359 | 59.79975007 | 46.05571299 | 46.09583226 | 39.95883235 |
| 339 | hsa-miR-212     | 31.69865653 | 37.76084635 | 32.39790688 | 56.82322323 | 118.0085617 | 161.681877  | 133.8684121 | 107.0339344 | 37.02825562 | 29.6291481  | 17.07902543 | 26.68489843 |
| 338 | hsa-miR-2113    | 10.5829311  | 15.76910901 | 23.71069217 | 44.24351543 | 27.49668206 | 28.11766015 | 24.65886721 | 1.053806774 | 44.98400369 | 32.49610339 | 55.4009343  | 31.28192717 |
| 337 | hsa-miR-2110    | 20.66532482 | 28.02059677 | 23.88835759 | 56.57879917 | 34.29528275 | 40.87923976 | 58.46429879 | 8.718097701 | 61.1858704  | 28.99104527 | 29.45228841 | 35.87861655 |
| 336 | hsa-miR-211     | 3.515775917 | 26.01852426 | 25.91194343 | 46.32094609 | 23.13525288 | 44.49537484 | 27.06538425 | 11.29559412 | 12852.17495 | 12831.27298 | 25383.8535  | 12223.20713 |
| 335 | hsa-miR-210     | 26.63342354 | 33.82188142 | 52.72345778 | 58.82397895 | 33.81994509 | 49.38194195 | 82.54484232 | 21.53537762 | 94.35519015 | 22.23516647 | 25.42544318 | 29.12334104 |
| 334 | hsa-miR-21*     | 15.44721759 | 12.14443947 | 16.00856796 | 54.78222269 | 40.7818291  | 35.30516415 | 32.45564658 | 9.402892941 | 2394.798324 | 2113.24393  | 5037.229204 | 2073.81926  |
| 333 | hsa-miR-21      | 9733.767611 | 10518.65419 | 25562.47716 | 12459.41256 | 12879.35569 | 12883.64127 | 26423.70584 | 10883.45212 | 90.69963401 | 30.09224347 | 21.34385446 | 17.76186383 |
| 332 | hsa-miR-20b*    | 4.823179329 | 16.38007764 | 21.55420452 | 43.53306052 | 80.58329704 | 40.43249929 | 17.75257755 | 8.662589356 | 4938.567108 | 4370.46624  | 5200.531348 | 4305.631243 |
| 331 | hsa-miR-20b     | 1094.03612  | 1116.83449  | 2987.81924  | 1424.737726 | 2019.057826 | 1736.30579  | 5160.221799 | 1674.491582 | 54.00031642 | 26.07153045 | 20.35341648 | 19.55170397 |
| 330 | hsa-miR-20a*    | 11.91109376 | 20.51964403 | 27.02717874 | 51.67701391 | 106.5718097 | 48.69909972 | 26.07410567 | 5.829695735 | 32.84029836 | 2.990096375 | 18.00756041 | 0.015649658 |
| 329 | hsa-miR-20a     | 2401.126122 | 2314.522725 | 2971.493512 | 2687.198923 | 4996.418207 | 4205.086908 | 4891.323894 | 3628.39823  | 109.7434615 | 87.29677872 | 101.2381248 | 80.54649966 |
| 328 | hsa-miR-208b    | 0.01525985  | 23.81708387 | 27.71859435 | 53.01355161 | 91.27593464 | 34.03729657 | 43.76520551 | 0.101586194 | 0.026049162 | 18.94892563 | 9.601769112 | 3.274421453 |
| 327 | hsa-miR-208a    | 21.19678772 | 20.01180564 | 49.33979503 | 65.41235197 | 40.10625186 | 17.75082907 | 0.049272036 | 0.04846421  | 12.85851777 | 18.20177292 | 9.281588016 | 17.29662662 |
| 326 | hsa-miR-206     | 17.48572258 | 21.0626638  | 49.23663876 | 49.58657895 | 69.32416656 | 46.95710835 | 28.11476203 | 44.21116651 | 21.96726581 | 36.13449693 | 13.34238561 | 1.740341728 |
| 325 | hsa-miR-2054    | 15.27610079 | 33.55106687 | 61.40989498 | 41.93612938 | 28.60824243 | 11.63611788 | 7.178042068 | 2.157464915 | 22.5298591  | 14.52868321 | 6.482405718 | 8.221750967 |
| 324 | hsa-miR-2053    | 20.9425079  | 21.27745509 | 47.78547367 | 52.93535625 | 44.29130326 | 29.42002436 | 14.61643354 | 7.770511115 | 43.31455685 | 23.50960538 | 18.05312845 | 15.52990109 |
| 323 | hsa-miR-2052    | 15.01987387 | 13.5641188  | 42.90169173 | 46.09478623 | 23.55532086 | 20.42409268 | 0.445284814 | 4.517471978 | 30.16286123 | 8.354619234 | 8.71050408  | 13.05165217 |
| 322 | hsa-miR-205*    | 19.11387269 | 18.06690338 | 56.4299836  | 44.15184701 | 24.66403734 | 21.20410249 | 0.051941454 | 11.90441085 | 91.32380231 | 82.43538086 | 76.43621494 | 60.7236063  |
| 321 | hsa-miR-205     | 17.72032261 | 10.04004564 | 48.1575647  | 46.53143134 | 34.47984157 | 33.88530448 | 8.978151984 | 19.51709612 | 30.28356266 | 0.020728159 | 0.034772839 | 3.909146048 |
| 320 | hsa-miR-204     | 17.60670226 | 17.92645915 | 47.21488028 | 54.94037898 | 36.70584891 | 21.57693835 | 26.10546693 | 7.477080201 | 53.61759106 | 31.82180222 | 20.75619441 | 19.74023669 |
| 319 | hsa-miR-203     | 51.03987885 | 49.5839718  | 78.15026544 | 77.3384424  | 122.3828518 | 82.80835688 | 77.68773163 | 84.18535112 | 28.17863061 | 34.94994411 | 19.14514553 | 15.23803622 |
| 318 | hsa-miR-202*    | 13.95404553 | 18.75436178 | 65.92956703 | 51.51993041 | 27.42033409 | 11.89826672 | 0.12433434  | 5.357588438 | 24.18547869 | 50.88679551 | 30.98613493 | 39.79083925 |
| 317 | hsa-miR-202     | 16.55339703 | 24.23003744 | 42.04800539 | 54.31511969 | 29.70991024 | 31.89989353 | 11.51661761 | 11.05250745 | 40.45843366 | 22.06994447 | 14.51364686 | 17.50467972 |
| 316 | hsa-miR-200c*   | 9.198971634 | 19.3089581  | 48.63877824 | 46.9951582  | 40.01768101 | 34.73958821 | 16.50862855 | 13.92987476 | 52.2147143  | 10.92213135 | 3.724788557 | 3.881725491 |
| 315 | hsa-miR-200c    | 29.71926518 | 42.45216651 | 73.30739746 | 73.32075086 | 86.17713878 | 103.7537059 | 63.19512956 | 68.88854779 | 38.42925375 | 25.33758213 | 12.44588243 | 14.86493526 |
| 314 | hsa-miR-200b*   | 19.45160974 | 24.73665993 | 59.52488413 | 62.31771676 | 31.70726749 | 27.98158745 | 7.900103297 | 17.41598261 | 30.83203687 | 24.66456689 | 4.129401482 | 15.98153603 |
| 313 | hsa-miR-200b    | 0.86480842  | 19.38738489 | 49.45016627 | 54.8424648  | 47.66476039 | 32.82688039 | 0.054422527 | 15.16131525 | 23.90637589 | 17.95924928 | 6.10123523  | 18.75139305 |
| 312 | hsa-miR-200a*   | 0.011559536 | 13.48219814 | 49.91719987 | 52.85714189 | 24.49808105 | 41.4007727  | 11.56717172 | 17.40194527 | 41.25664147 | 26.5178624  | 23.45044246 | 31.79480527 |
| 311 | hsa-miR-200a    | 2.530830753 | 10.59340569 | 50.40378354 | 56.44803477 | 37.77042227 | 13.88011413 | 0.048411431 | 8.970510412 | 1598.743404 | 2028.52739  | 1804.392077 | 1471.009684 |
| 310 | hsa-miR-19b-2*  | 0.01148583  | 5.304361123 | 45.84741137 | 49.00389777 | 33.54496325 | 15.41139259 | 0.050057451 | 23.58121473 | 32.47222544 | 10.68105953 | 0.017034404 | 25.38524597 |
| 309 | hsa-miR-19b-1*  | 2.223117582 | 9.509749097 | 37.19349276 | 47.34862322 | 28.7859543  | 21.66688225 | 5.66092212  | 29.46911591 | 145.352482  | 68.18991506 | 110.3089221 | 84.35070814 |
| 308 | hsa-miR-19b     | 362.7101183 | 446.3749855 | 477.3564556 | 339.8486774 | 1528.113752 | 1795.847412 | 1592.2673   | 1251.150302 | 36.92156473 | 6.436395139 | 3.864406791 | 28.34750339 |
| 307 | hsa-miR-19a*    | 2.258273065 | 7.78529322  | 42.42877594 | 41.51415936 | 26.50253213 | 20.71352675 | 0.053327028 | 22.38180389 | 49.17368737 | 11.51840319 | 12.75788277 | 21.41940613 |
| 306 | hsa-miR-19a     | 14.7031279  | 17.23863521 | 59.37994792 | 49.60706987 | 114.8718061 | 67.31090174 | 129.2362936 | 80.04571759 | 73.10951787 | 6.187032242 | 7.267108809 | 33.76194111 |
| 305 | hsa-miR-199b-5p | 0.01272302  | 5.246269113 | 36.68714886 | 46.34789958 | 22.55790632 | 31.26568037 | 13.87016747 | 19.85130396 | 176.7511052 | 25.73755709 | 38.12098244 | 53.86073575 |
| 304 | hsa-miR-199a-5p | 6.444558995 | 5.670248904 | 41.67704822 | 45.83458248 | 55.52519233 | 33.3299957  | 6.130113548 | 28.38530667 | 7490.463358 | 8453.915434 | 8206.628559 | 8602.320835 |
| 303 | hsa-miR-199a-3p | 14.78995908 | 17.3079346  | 53.40368335 | 59.1162625  | 80.1173443  | 32.5047147  | 0.705420737 | 26.12735998 | 260.3740736 | 257.3443038 | 251.6773908 | 310.0490523 |
| 302 | hsa-miR-198     | 87.02335063 | 64.8308463  | 89.67671614 | 99.69487724 | 126.0781686 | 45.22528238 | 25.29278778 | 36.16929232 | 1828.041617 | 1793.721134 | 1713.306254 | 1717.640564 |
| 301 | hsa-miR-1979    | 2365.791976 | 2974.351585 | 3256.506714 | 3320.790083 | 10003.46002 | 10660.72349 | 9644.604524 | 10618.20036 | 65.5883524  | 15.86274747 | 23.76774195 | 41.91458247 |
| 300 | hsa-miR-1978    | 533.9903843 | 712.3139801 | 771.9226675 | 785.1431719 | 633.6029017 | 650.9351486 | 589.4444589 | 655.2713698 | 9122.818654 | 8938.570251 | 8854.21407  | 9354.384358 |
| 299 | hsa-miR-1977    | 978.3719816 | 1062.055405 | 1133.366851 | 1126.760753 | 2855.372879 | 2851.256365 | 2582.115743 | 2680.162862 | 5891.769864 | 5918.564729 | 5803.902751 | 6140.519273 |

|     |                 |             |             |             |             |             |             |             |             |             |             |             |             |
|-----|-----------------|-------------|-------------|-------------|-------------|-------------|-------------|-------------|-------------|-------------|-------------|-------------|-------------|
| 298 | hsa-miR-1976    | 0.015230903 | 13.80318677 | 44.16357351 | 45.70115276 | 89.51035693 | 39.27760028 | 11.27944242 | 36.60427859 | 47.45445054 | 25.70394893 | 34.2889696  | 33.98156609 |
| 297 | hsa-miR-1975    | 2911.414903 | 2940.226894 | 3306.473852 | 3272.764243 | 10611.3995  | 10462.4434  | 9348.5228   | 10464.78212 | 50.16583386 | 31.05544483 | 36.17811487 | 40.37513383 |
| 296 | hsa-miR-1974    | 2739.13969  | 2807.800162 | 3133.918202 | 3145.872725 | 5309.99817  | 5273.938488 | 4748.263295 | 5261.924132 | 174.238847  | 151.7238965 | 183.5176473 | 148.2870599 |
| 295 | hsa-miR-1973    | 20.66635348 | 41.23967355 | 49.72530648 | 46.74211638 | 50.05586341 | 63.05291041 | 34.73833498 | 39.90675462 | 47.70093331 | 28.26387604 | 45.49722314 | 38.12089712 |
| 294 | hsa-miR-1972    | 10.31773583 | 20.53664846 | 32.91839587 | 26.44944762 | 30.98443602 | 37.79147812 | 20.51805678 | 38.50241159 | 55.89739952 | 22.39873979 | 89.41305162 | 34.49243129 |
| 293 | hsa-miR-197     | 28.61839277 | 40.13667513 | 53.20660469 | 42.25810157 | 197.1074133 | 192.48958   | 198.2642416 | 171.2417077 | 40.41535777 | 30.0724492  | 26.42806181 | 21.86898675 |
| 292 | hsa-miR-196b*   | 6.599486927 | 28.18380671 | 30.60348443 | 35.16460814 | 38.09569848 | 25.77651494 | 19.02077026 | 22.45071894 | 730.0316594 | 2067.002868 | 738.2153747 | 710.327034  |
| 291 | hsa-miR-196b    | 24.61531965 | 26.96934878 | 38.52451546 | 41.3227012  | 44.54722961 | 39.47944099 | 53.77949397 | 40.53639238 | 29.35345728 | 29.14230112 | 42.50663693 | 5.706382665 |
| 290 | hsa-miR-196a*   | 12.77590746 | 21.21698914 | 29.02998979 | 30.96978441 | 38.14863234 | 30.67608202 | 15.02895864 | 18.9446368  | 179.4737941 | 202.279943  | 189.35162   | 131.4234795 |
| 289 | hsa-miR-196a    | 341.1308197 | 604.7091523 | 354.8783233 | 402.3269655 | 801.4428046 | 2016.8027   | 815.9757467 | 753.1240165 | 29.60095709 | 31.3155133  | 9.894836699 | 0.016177538 |
| 288 | hsa-miR-195*    | 20.92536358 | 29.05217955 | 32.92584324 | 53.30373802 | 48.00094025 | 11.91669639 | 27.34293968 | 0.040462316 | 66.07391286 | 64.64664003 | 70.43573054 | 47.18158908 |
| 287 | hsa-miR-195     | 108.2194432 | 82.85243909 | 101.5404389 | 101.9397514 | 192.8027177 | 156.0612073 | 161.0675195 | 131.6387721 | 143.6984104 | 139.5194864 | 133.4440426 | 109.7355622 |
| 286 | hsa-miR-194*    | 9.621605118 | 21.94403084 | 39.38298597 | 50.77887626 | 18.02875971 | 9.434737983 | 21.00000117 | 3.779797998 | 53.46115228 | 34.8680189  | 41.89156964 | 22.51473141 |
| 285 | hsa-miR-194     | 30.82086607 | 38.42828836 | 40.35903351 | 62.0198731  | 67.3478652  | 54.7773598  | 82.83324393 | 51.49516109 | 111.0385447 | 134.9793436 | 94.3334333  | 63.1912968  |
| 284 | hsa-miR-193b*   | 50.65572051 | 52.4843849  | 67.50054647 | 69.67898322 | 128.7882415 | 124.5003071 | 124.7942392 | 107.1490997 | 35.82781576 | 32.33948122 | 22.17960495 | 0.016382579 |
| 283 | hsa-miR-193b    | 31.39548062 | 31.75450743 | 44.52734345 | 61.37545044 | 54.2724328  | 44.13473304 | 44.90112737 | 21.33004142 | 23.64803815 | 25.29404641 | 22.9914277  | 7.528173047 |
| 282 | hsa-miR-193a-5p | 71.26150081 | 85.08560252 | 71.85938721 | 78.5322199  | 107.1867654 | 114.677813  | 112.4186556 | 93.82334571 | 129.034461  | 151.3599538 | 127.0810436 | 117.6146348 |
| 281 | hsa-miR-193a-3p | 20.92095188 | 32.48632116 | 30.71803984 | 57.33766507 | 33.88702169 | 29.70457068 | 24.76644609 | 1.108085009 | 43.58059983 | 38.08031243 | 37.69250651 | 11.02846203 |
| 280 | hsa-miR-192*    | 1.130324795 | 24.45675332 | 26.25267242 | 47.1175354  | 37.93572583 | 22.35277312 | 19.16048443 | 0.042634675 | 399.5555324 | 388.7668091 | 377.6641408 | 347.2865843 |
| 279 | hsa-miR-192     | 67.21268433 | 82.1370522  | 69.63402092 | 89.16430645 | 133.4866042 | 121.1593497 | 125.6540432 | 98.04791934 | 44.13825515 | 47.84295557 | 54.97768069 | 4.410485043 |
| 278 | hsa-miR-1915*   | 12.51713753 | 23.63909285 | 24.62646107 | 45.42770891 | 39.36552688 | 21.70592414 | 31.67964344 | 11.1975253  | 89.61615186 | 78.30634279 | 84.66346044 | 65.09250567 |
| 277 | hsa-miR-1915    | 2040.619143 | 2458.590642 | 2750.214712 | 2652.572327 | 391.2187547 | 403.550713  | 407.8727828 | 356.8519984 | 104.2482035 | 85.93766089 | 91.34450703 | 69.28322791 |
| 276 | hsa-miR-1914*   | 14.03695679 | 21.5504494  | 23.00451673 | 53.41199627 | 39.73577907 | 31.50730427 | 32.93253404 | 11.7572381  | 32.6967086  | 28.47124098 | 48.45342638 | 14.21403052 |
| 275 | hsa-miR-1914    | 11.89678941 | 27.11620481 | 35.2788505  | 49.80436023 | 90.79057095 | 73.40507002 | 95.05822267 | 68.63282194 | 32.34756084 | 30.92387244 | 43.32385213 | 12.8686051  |
| 274 | hsa-miR-1913    | 32.71690338 | 38.5728809  | 40.6484163  | 55.77557855 | 84.40179143 | 73.19682554 | 74.02219338 | 64.96757796 | 33.4839556  | 40.74995867 | 47.45092255 | 29.80768116 |
| 273 | hsa-miR-1912    | 0.011391971 | 18.73001943 | 29.92496666 | 48.75040492 | 31.11594696 | 16.50455121 | 23.60150649 | 6.557352423 | 47.70508617 | 55.04875155 | 57.92129152 | 0.016028202 |
| 272 | hsa-miR-1911*   | 2.951486977 | 31.1856563  | 29.42597206 | 48.65674662 | 34.95548455 | 28.71733497 | 22.15288379 | 13.80580443 | 92.87440221 | 74.87573537 | 64.65519855 | 65.70770473 |
| 271 | hsa-miR-1911    | 0.011347113 | 20.78678569 | 28.65867036 | 41.25845151 | 37.48496806 | 34.92362908 | 42.3427666  | 33.07972428 | 798.8617117 | 815.3566458 | 794.7441763 | 802.906448  |
| 270 | hsa-miR-1910    | 11.70184547 | 20.67219185 | 35.39108375 | 42.33163147 | 43.00651088 | 34.96426011 | 36.33074949 | 32.2484696  | 42.9158514  | 26.95354388 | 31.46678962 | 13.9859233  |
| 269 | hsa-miR-191*    | 19.49712292 | 51.48726812 | 48.41470051 | 67.01579022 | 66.64035479 | 58.82083993 | 54.52559727 | 42.08896142 | 52.85095344 | 32.14906722 | 44.50874532 | 35.69072587 |
| 268 | hsa-miR-191     | 687.0039899 | 776.03161   | 729.9950343 | 803.169732  | 788.3040575 | 808.6011358 | 790.1457501 | 764.5639028 | 58.73842184 | 48.71348201 | 63.40696936 | 38.50256315 |
| 267 | hsa-miR-190b    | 11.59759035 | 17.35612149 | 30.03480606 | 50.34545116 | 0.104589056 | 22.98519708 | 32.6554655  | 0.051569127 | 86.17372807 | 53.5622815  | 73.40105081 | 41.4550486  |
| 266 | hsa-miR-1909*   | 1.311488317 | 19.10527718 | 25.57337168 | 44.41176846 | 37.50758025 | 22.76679584 | 29.44047573 | 15.689326   | 36.08600577 | 29.46052074 | 21.83474615 | 21.80005858 |
| 265 | hsa-miR-1909    | 0.011788909 | 17.11974577 | 23.05535741 | 43.88504495 | 38.4098221  | 34.3442307  | 31.48252564 | 24.50087975 | 60.6329786  | 54.01043573 | 49.58133823 | 64.47268685 |
| 264 | hsa-miR-1908    | 132.3899546 | 88.88174311 | 92.43416504 | 119.5785888 | 59.0443347  | 49.56848733 | 31.43061425 | 44.53806321 | 248.2558253 | 128.63886   | 136.2474564 | 137.2072048 |
| 263 | hsa-miR-190     | 3.655406956 | 19.02394415 | 20.78489738 | 42.29108386 | 58.88658735 | 0.180999645 | 12.12972036 | 0.053934987 | 85.09147543 | 42.41566546 | 62.70125268 | 29.18258254 |
| 262 | hsa-miR-18b*    | 17.8051007  | 22.79504967 | 28.52812933 | 45.75049996 | 45.93672131 | 42.62527204 | 43.90920339 | 37.89329866 | 525.5999687 | 466.4908818 | 514.3343539 | 341.1582212 |
| 261 | hsa-miR-18b     | 32.76357193 | 38.58275004 | 51.74809286 | 71.28597413 | 296.6125856 | 153.4623664 | 141.6378929 | 308.9847219 | 169.451014  | 159.4017627 | 127.7825183 | 87.71083042 |
| 260 | hsa-miR-18a*    | 0.015111137 | 2.468275879 | 13.13083513 | 38.37624428 | 109.211453  | 52.20849949 | 46.47986834 | 31.15485355 | 40.49183225 | 49.97062513 | 18.50142547 | 0.015062066 |
| 259 | hsa-miR-18a     | 92.58988113 | 83.70107337 | 128.5512894 | 99.69744396 | 566.0789696 | 489.1461304 | 521.33712   | 404.2646586 | 70.28828543 | 54.38145806 | 38.46016174 | 25.84457322 |
| 258 | hsa-miR-188-5p  | 65.66983108 | 46.60529409 | 75.4292281  | 67.83521629 | 116.7177566 | 103.921839  | 98.15971151 | 68.52217902 | 30.53974753 | 23.9020026  | 18.98552789 | 1.900261506 |
| 257 | hsa-miR-188-3p  | 15.94845649 | 11.92724659 | 35.62546063 | 48.75229786 | 28.88913994 | 30.09429954 | 21.04568041 | 0.046185297 | 39.7899733  | 29.64293992 | 31.7293831  | 4.249959609 |
| 256 | hsa-miR-187*    | 20.49684716 | 21.94385342 | 46.32616136 | 50.49642173 | 35.59178842 | 37.05830824 | 21.2619613  | 13.54182755 | 157.2602189 | 125.2262535 | 106.9869268 | 89.065703   |
| 255 | hsa-miR-187     | 22.35743318 | 28.20174741 | 47.87353174 | 51.02315803 | 16.94598153 | 28.03687628 | 13.06951902 | 4.923560012 | 42.29405563 | 35.1271792  | 19.35294628 | 8.751667985 |
| 254 | hsa-miR-186*    | 653.7534581 | 372.239465  | 915.0273936 | 669.3899629 | 30.7990472  | 17.68651589 | 16.89216958 | 0.047158703 | 183.345182  | 170.5247752 | 371.7602331 | 134.9546136 |
| 253 | hsa-miR-186     | 21.38457105 | 32.57017737 | 88.59992228 | 61.61790863 | 127.5824226 | 141.2334198 | 103.0882282 | 93.19872081 | 46.74054379 | 23.91479755 | 17.11267493 | 1.325248114 |
| 252 | hsa-miR-185*    | 11.8851932  | 17.23836557 | 30.247445   | 44.03077189 | 18.91777362 | 34.64083265 | 17.04451204 | 2.476251175 | 55.22953455 | 56.47714885 | 44.68181256 | 20.5329274  |

|     |                 |             |             |             |             |              |              |             |              |             |             |             |             |
|-----|-----------------|-------------|-------------|-------------|-------------|--------------|--------------|-------------|--------------|-------------|-------------|-------------|-------------|
| 251 | hsa-miR-185     | 91.4737313  | 103.5241275 | 172.1895758 | 127.0016727 | 222.0978522  | 220.5924742  | 503.2771121 | 168.5649268  | 532.3604265 | 496.3202425 | 541.9380672 | 398.7637787 |
| 250 | hsa-miR-184     | 12.47331504 | 14.85572461 | 33.32378244 | 51.47328554 | 33.65899335  | 26.15211247  | 21.78291087 | 0.044929558  | 47.29601844 | 26.52526611 | 14.65975947 | 2.61343635  |
| 249 | hsa-miR-183*    | 14.61893594 | 24.4856581  | 45.90278055 | 50.35920978 | 58.29876574  | 53.57421305  | 39.93087911 | 22.60377666  | 10861.77864 | 11056.5221  | 11010.08553 | 10377.34115 |
| 248 | hsa-miR-183     | 206.9627722 | 216.6848758 | 299.6742645 | 249.9713776 | 513.8774443  | 493.1308614  | 649.0647196 | 436.11121728 | 345.4373217 | 305.8646814 | 286.4548586 | 303.7331981 |
| 247 | hsa-miR-1827    | 0.480350111 | 13.8851714  | 31.2126799  | 44.32932578 | 22.36302662  | 26.81442735  | 24.68222818 | 0.042960674  | 47.28029951 | 24.14481482 | 3.477361633 | 10.54250508 |
| 246 | hsa-miR-1826    | 15162.8437  | 16562.30135 | 17512.71805 | 18102.31353 | 21488.31232  | 22634.75012  | 20528.49901 | 18278.56966  | 1224.103597 | 1185.21703  | 1331.332164 | 1277.863831 |
| 245 | hsa-miR-1825    | 22.3884346  | 23.27993898 | 34.56510885 | 37.31656925 | 97.1385311   | 84.40977868  | 74.62694267 | 70.82355761  | 279.5456573 | 228.6751603 | 392.7967449 | 234.4783228 |
| 244 | hsa-miR-182*    | 10.29031713 | 16.6575093  | 38.14322835 | 53.46820609 | 32.98220407  | 19.37513313  | 19.78051697 | 0.046542567  | 36.51050044 | 31.98371844 | 26.48900266 | 23.58099583 |
| 243 | hsa-miR-182     | 527.7007863 | 539.5058302 | 648.3102932 | 764.2207138 | 1368.289774  | 1354.874477  | 1408.723503 | 1265.004605  | 49.29476234 | 33.35016048 | 28.51086676 | 28.66023878 |
| 242 | hsa-miR-181d    | 41.87525124 | 37.8308449  | 69.00836785 | 89.88319036 | 257.3763944  | 223.7447824  | 481.4509811 | 235.2342543  | 1259.899945 | 1013.290976 | 1266.118645 | 1107.715276 |
| 241 | hsa-miR-181c*   | 10.10766306 | 15.88278108 | 37.05256338 | 37.41050294 | 37.61206626  | 21.88802104  | 6.084033249 | 21.97775593  | 198.1738266 | 141.0720446 | 157.5238354 | 145.9039857 |
| 240 | hsa-miR-181c    | 7.414426243 | 16.19277405 | 31.78880874 | 41.22837443 | 46.12129004  | 28.75832897  | 30.70908228 | 16.69239099  | 57.30236195 | 55.11910784 | 59.90674035 | 57.16308799 |
| 239 | hsa-miR-181b    | 119.2756494 | 101.0222332 | 146.6374895 | 149.6789571 | 1209.891802  | 1022.505895  | 1238.840667 | 1018.106256  | 980.5114439 | 889.8922338 | 998.7203502 | 929.108704  |
| 238 | hsa-miR-181a-2* | 24.52443305 | 25.13533102 | 38.30763747 | 58.25630194 | 169.4952606  | 128.2343982  | 160.4896653 | 124.1389348  | 71.25624232 | 39.84663541 | 50.52300959 | 34.38825295 |
| 237 | hsa-miR-181a*   | 0.397625763 | 19.98718422 | 40.6175833  | 45.84407101 | 51.31750444  | 50.26848342  | 58.93141831 | 31.43226112  | 3633.831114 | 3567.131385 | 3663.102042 | 3487.417487 |
| 236 | hsa-miR-181a    | 382.6962815 | 415.9658602 | 449.9375162 | 507.0262157 | 1110.048568  | 1086.488099  | 1049.896916 | 969.2992743  | 177.5399837 | 89.1482178  | 93.81971705 | 98.86636058 |
| 235 | hsa-miR-17*     | 6.384347324 | 22.68651968 | 56.94702099 | 50.86442905 | 67.23997404  | 58.30555998  | 92.39027956 | 34.98716441  | 68.95283718 | 31.18515693 | 22.48191981 | 24.04932685 |
| 234 | hsa-miR-17      | 1846.336242 | 1833.72219  | 2211.067891 | 2251.69145  | 3490.240044  | 3310.394725  | 3213.964161 | 2887.315833  | 3016.987849 | 2531.534328 | 2837.508324 | 2794.406441 |
| 233 | hsa-miR-16-2*   | 52.50109332 | 36.37683561 | 64.72630571 | 70.23708425 | 251.8273564  | 106.3063959  | 160.1837406 | 92.60157116  | 145.9959514 | 50.28094049 | 41.06686127 | 39.46015232 |
| 232 | hsa-miR-16-1*   | 0.015379857 | 20.64446654 | 29.8022146  | 48.39805593 | 57.88462139  | 21.56784298  | 24.40310266 | 0.048026103  | 1589.623269 | 1610.619978 | 1564.954915 | 1559.228399 |
| 231 | hsa-miR-16      | 1761.203866 | 1560.023906 | 1936.300261 | 2108.942887 | 2808.554311  | 2341.175802  | 2344.937951 | 2254.547559  | 46.66971039 | 27.15265807 | 15.13854896 | 2.65971527  |
| 230 | hsa-miR-15b*    | 3.322692904 | 17.46466255 | 37.41226786 | 52.92766015 | 140.5150494  | 47.18060044  | 46.38057777 | 21.82188663  | 107.4974824 | 136.4551673 | 106.4534428 | 78.19577585 |
| 229 | hsa-miR-15b     | 1165.036633 | 1309.294396 | 1418.159447 | 1388.37438  | 1733.227603  | 1658.910503  | 1550.619047 | 1751.051349  | 23.93146108 | 41.37001734 | 0.01784166  | 1.700103205 |
| 228 | hsa-miR-15a*    | 10.73398631 | 26.5626363  | 44.1717756  | 31.06681176 | 17.29912457  | 18.35556465  | 1.425204959 | 0.039472064  | 536.7747092 | 647.0240553 | 550.540509  | 504.7039614 |
| 227 | hsa-miR-15a     | 42.74246219 | 66.76222425 | 65.27205094 | 62.55755142 | 122.7813267  | 163.8092637  | 117.3387719 | 106.3898991  | 39.57761852 | 26.20307567 | 10.04669026 | 0.016337586 |
| 226 | hsa-miR-155*    | 3.069659904 | 38.21765282 | 40.14548568 | 38.21765282 | 17.664432573 | 17.664432573 | 36.79416645 | 2.891682898  | 33.89571638 | 22.70669249 | 8.823691434 | 8.704623475 |
| 225 | hsa-miR-155     | 270.868829  | 363.7297701 | 332.941298  | 290.5986886 | 547.1693638  | 653.4196751  | 493.0273388 | 574.7046065  | 46.47390591 | 35.78391326 | 16.27104639 | 10.49939382 |
| 224 | hsa-miR-154*    | 10.33129396 | 32.64997486 | 52.80391972 | 34.8779982  | 16.91312647  | 25.70576904  | 0.059318103 | 15.95906337  | 37.36671615 | 37.44561261 | 17.24928538 | 7.583519476 |
| 223 | hsa-miR-154     | 7.351495397 | 34.82092481 | 38.72524766 | 25.34015508 | 23.53948969  | 30.88119752  | 2.955760551 | 10.93410081  | 30.96670198 | 24.25749754 | 1.538493722 | 8.32581097  |
| 222 | hsa-miR-1539    | 7.764812375 | 34.0345499  | 36.64963376 | 30.28149093 | 18.78127401  | 31.89006227  | 10.71039698 | 12.93932039  | 26.84601146 | 19.55876859 | 2.172202152 | 10.14180203 |
| 221 | hsa-miR-1538    | 11.60854482 | 33.72671855 | 49.16401621 | 27.79655746 | 28.54815755  | 26.23294765  | 5.123888446 | 21.35101383  | 50.22297432 | 37.67596478 | 15.21324544 | 19.66188495 |
| 220 | hsa-miR-1537    | 5.736796304 | 35.10208657 | 63.01275845 | 36.1983567  | 21.31120866  | 19.23424802  | 0.116089145 | 15.31538429  | 971.7512924 | 1117.981736 | 1158.143649 | 881.435252  |
| 219 | hsa-miR-153     | 0.011827865 | 28.71112843 | 48.71026582 | 30.81857691 | 8.384845506  | 20.97631971  | 0.68110585  | 17.05863102  | 198.8431223 | 259.8696905 | 221.8505569 | 162.2395231 |
| 218 | hsa-miR-152     | 48.32339863 | 72.52661812 | 90.69756503 | 73.70395638 | 29.81372825  | 44.47652191  | 17.5541399  | 15.0610223   | 150.4193988 | 116.0850663 | 108.8518762 | 104.2957406 |
| 217 | hsa-miR-151-5p  | 261.227504  | 355.5929285 | 474.2463698 | 374.024084  | 978.2763285  | 1094.690813  | 1124.180108 | 896.2760046  | 64.6159833  | 41.94227807 | 34.94352331 | 57.04827561 |
| 216 | hsa-miR-151-3p  | 87.398834   | 131.2623958 | 151.6437946 | 102.4551746 | 206.6390945  | 283.6477332  | 293.7038028 | 193.2493428  | 181.3370417 | 175.8357668 | 153.7285313 | 145.3200955 |
| 215 | hsa-miR-150*    | 223.5267765 | 287.899749  | 325.5636625 | 262.2895208 | 68.70336555  | 73.32679082  | 68.84718086 | 62.29897178  | 64.85786044 | 52.03247418 | 41.54619635 | 59.05569154 |
| 214 | hsa-miR-150     | 96.92484868 | 130.7722012 | 129.0294824 | 129.2944397 | 90.02412878  | 104.3782325  | 70.42108045 | 89.21759573  | 25.71940784 | 24.65971741 | 16.78932975 | 33.65626466 |
| 213 | hsa-miR-149*    | 1902.243444 | 2177.337998 | 2311.764043 | 2438.01816  | 110.6491254  | 107.1840903  | 92.08870649 | 93.68120209  | 206.011696  | 226.5281115 | 216.8734559 | 157.6388871 |
| 212 | hsa-miR-149     | 26.44132153 | 42.94674561 | 40.2652603  | 42.30663115 | 53.35205123  | 43.45197718  | 40.13283212 | 51.4211719   | 23.48332664 | 22.87867775 | 44.30880572 | 28.86652746 |
| 211 | hsa-miR-148b*   | 9.349887362 | 25.44819161 | 40.44436171 | 34.41104795 | 31.23051331  | 16.26404086  | 0.052868827 | 24.2264843   | 27.57398889 | 29.70032346 | 25.14091483 | 32.21708838 |
| 210 | hsa-miR-148b    | 59.10160165 | 61.9612463  | 87.15599355 | 86.14692322 | 250.0587339  | 275.169563   | 269.795614  | 215.3064589  | 25.37157382 | 11.1089325  | 16.8901706  | 34.52097407 |
| 209 | hsa-miR-148a*   | 3.018079578 | 28.57693846 | 51.7875405  | 36.89831498 | 31.32210826  | 24.81460949  | 10.90197428 | 30.02064994  | 56.31282168 | 40.92407887 | 24.56143925 | 44.11317413 |
| 208 | hsa-miR-148a    | 7.38240014  | 28.59537994 | 48.81941188 | 36.0295743  | 18.51896578  | 28.5954283   | 31.0019275  | 23.45925758  | 76.12815677 | 33.54434534 | 34.84713274 | 58.04747963 |
| 207 | hsa-miR-147b    | 2.734311362 | 17.47293477 | 41.13656983 | 25.03431395 | 14.43218091  | 31.77034251  | 0.057689502 | 24.97977369  | 31.47327423 | 12.07589777 | 18.19582841 | 48.64356689 |
| 206 | hsa-miR-1471    | 3.291329103 | 22.26890752 | 39.97706018 | 30.33611222 | 16.25221588  | 20.97994099  | 20.87207983 | 23.0463927   | 96.96516678 | 30.95856697 | 25.14363097 | 45.98076068 |
| 205 | hsa-miR-1470    | 22.24845008 | 30.06228584 | 34.51278696 | 33.74921389 | 44.91254237  | 69.97792325  | 26.59910707 | 42.39412303  | 35.5008241  | 18.36915574 | 23.49313523 | 42.95955231 |

|     |                 |             |             |             |             |             |             |             |             |             |             |             |             |
|-----|-----------------|-------------|-------------|-------------|-------------|-------------|-------------|-------------|-------------|-------------|-------------|-------------|-------------|
| 203 | hsa-miR-146b-5p | 55.39765862 | 33.4912335  | 45.25708993 | 49.09023524 | 107.9598503 | 39.21676644 | 26.7174079  | 42.67260598 | 20.02001248 | 1.71576155  | 17.44755633 | 24.97949363 |
| 202 | hsa-miR-146b-3p | 3.534801717 | 19.89900402 | 32.27871213 | 21.50035964 | 57.502225   | 33.97862405 | 12.42052829 | 31.99261784 | 60.35219877 | 30.26125788 | 43.73425081 | 49.81818697 |
| 201 | hsa-miR-146a*   | 0.01582859  | 14.63074072 | 35.08649163 | 27.69973682 | 32.39558674 | 29.68386361 | 18.19156064 | 18.82373505 | 334.5637114 | 325.5350092 | 328.1189918 | 340.0531712 |
| 200 | hsa-miR-146a    | 949.8921329 | 719.7897184 | 905.4910934 | 641.1856445 | 41.01552708 | 30.95574227 | 27.40126523 | 30.1622608  | 17.73459139 | 28.49881217 | 15.72057425 | 29.39266627 |
| 199 | hsa-miR-1469    | 1323.532077 | 1526.530424 | 1559.323443 | 1622.401407 | 201.0317826 | 199.0175346 | 204.4505496 | 208.8080933 | 23.12196451 | 17.585779   | 56.89790116 | 34.52997049 |
| 198 | hsa-miR-1468    | 4.649892778 | 24.04294006 | 28.47974141 | 34.14094618 | 23.0313894  | 28.80786174 | 23.81806104 | 34.88442515 | 128.1937976 | 151.5350173 | 174.856389  | 125.4717371 |
| 197 | hsa-miR-145*    | 0.012058162 | 21.52013571 | 37.31893285 | 30.15745802 | 24.41650341 | 27.4874706  | 48.49745694 | 34.26062994 | 15.01369919 | 35.87532766 | 35.08842441 | 18.91232543 |
| 196 | hsa-miR-145     | 15.77466382 | 35.41156736 | 46.39145589 | 48.53875418 | 185.352338  | 184.5171186 | 215.5769622 | 157.5515231 | 19.56896725 | 31.14759479 | 39.72546404 | 37.33937875 |
| 195 | hsa-miR-144*    | 0.0157389   | 25.2162742  | 19.61003133 | 28.48129976 | 36.87163408 | 3.295262823 | 13.32592834 | 27.88403164 | 190.2189629 | 208.626633  | 213.3573246 | 167.6852799 |
| 194 | hsa-miR-144     | 0.012190278 | 14.0149797  | 29.21814359 | 26.24906944 | 11.92718655 | 18.31750235 | 35.79545901 | 22.17865618 | 24.50490594 | 28.18862201 | 24.04604663 | 0.015906971 |
| 192 | hsa-miR-143     | 12.78078561 | 24.19812495 | 26.40295211 | 34.03574327 | 228.1433366 | 250.7960192 | 235.4024883 | 175.4037629 | 12.51295636 | 32.73909093 | 17.68341912 | 0.015924067 |
| 191 | hsa-miR-142-5p  | 21.77226627 | 17.01302373 | 24.7284621  | 45.19111661 | 27.8401864  | 16.34838948 | 30.79889122 | 0.049219381 | 24.23033018 | 25.1784252  | 29.77651175 | 4.741570421 |
| 190 | hsa-miR-142-3p  | 24.13575722 | 25.44231086 | 27.38574426 | 43.43656031 | 21.86056761 | 15.32959917 | 26.24529201 | 0.04926185  | 27.35015907 | 15.75285696 | 23.91588884 | 4.788029718 |
| 189 | hsa-miR-141*    | 0.012137801 | 22.2726963  | 24.42928217 | 41.1814438  | 14.77840874 | 11.54959405 | 22.91910927 | 0.860873598 | 33.36684766 | 32.09805604 | 35.77086712 | 13.58275844 |
| 188 | hsa-miR-141     | 16.95490453 | 25.44341282 | 27.10019415 | 41.8573219  | 15.35349549 | 15.0578975  | 27.13632301 | 0.043381369 | 160.8801113 | 163.9531961 | 136.4752981 | 119.5236061 |
| 187 | hsa-miR-140-5p  | 22.21504718 | 20.67536355 | 19.20886633 | 40.71135753 | 21.91446703 | 28.30218096 | 31.0256694  | 6.337349371 | 403.777007  | 407.8588154 | 361.363238  | 352.6077226 |
| 186 | hsa-miR-140-3p  | 42.48525041 | 34.14858813 | 42.42421353 | 60.47295761 | 187.8396126 | 191.6279247 | 158.7702492 | 128.9449615 | 59.63704626 | 60.22583205 | 52.23820363 | 9.2112083   |
| 185 | hsa-miR-139-5p  | 92.95004692 | 110.212308  | 91.44643479 | 110.9956022 | 432.1074809 | 415.8932343 | 387.3199279 | 351.8944119 | 44.01749357 | 40.05994772 | 31.49203321 | 1.307344149 |
| 184 | hsa-miR-139-3p  | 12.51713881 | 16.50631546 | 25.35287099 | 50.47745679 | 57.16305467 | 42.36446483 | 42.15611949 | 16.12940237 | 54.57363356 | 49.87643664 | 29.19314224 | 24.51279779 |
| 183 | hsa-miR-138-2*  | 22.33558573 | 41.8385933  | 41.97951912 | 68.54224173 | 16.41159826 | 32.61291411 | 31.71850106 | 3.836537181 | 45.15804407 | 32.72869926 | 32.39107614 | 24.79528432 |
| 182 | hsa-miR-138-1*  | 19.40688723 | 21.05830046 | 24.3540879  | 44.63129013 | 42.05194728 | 36.34295063 | 45.1628371  | 16.8462872  | 37.74559847 | 29.96813606 | 33.22822073 | 8.398146948 |
| 181 | hsa-miR-138     | 18.52124848 | 28.95972407 | 31.07547786 | 48.76464334 | 46.1562495  | 41.70121317 | 37.74287818 | 22.20841578 | 33.6144185  | 9.093831647 | 20.57090366 | 7.651783021 |
| 180 | hsa-miR-137     | 11.49996092 | 20.99811658 | 30.34978885 | 47.74713626 | 26.67892022 | 30.52850388 | 31.30862842 | 0.045439437 | 25.74405378 | 20.98909895 | 33.7178822  | 0.016402026 |
| 179 | hsa-miR-136*    | 3.820566681 | 19.40846988 | 20.91959376 | 54.11802577 | 17.95062875 | 16.82839975 | 42.18923626 | 0.044853347 | 52.14451742 | 41.89905887 | 52.13515596 | 8.812747455 |
| 178 | hsa-miR-136     | 0.012320075 | 17.64282759 | 23.76514787 | 48.74480206 | 14.72552168 | 24.66968735 | 28.55318964 | 0.051071392 | 14.22806812 | 21.87991489 | 23.2128033  | 1.461056802 |
| 177 | hsa-miR-135b*   | 19.62718631 | 25.63349464 | 34.07695476 | 52.18738759 | 28.44743239 | 24.51809716 | 41.31597606 | 6.06521687  | 54.95083357 | 41.05952947 | 57.48888947 | 25.54711079 |
| 176 | hsa-miR-135b    | 0.011895336 | 14.67604408 | 27.99401376 | 46.47930499 | 16.48122142 | 27.99290211 | 30.63584362 | 7.53951188  | 16.64483407 | 19.12638242 | 35.78074143 | 0.635198114 |
| 175 | hsa-miR-135a*   | 9.80380444  | 25.16476795 | 23.16457694 | 58.50457009 | 24.86263452 | 24.61261732 | 34.41342893 | 14.81013903 | 123.2070673 | 102.7082982 | 107.3838074 | 76.72685332 |
| 174 | hsa-miR-135a    | 1.533171688 | 20.09549059 | 23.06473154 | 54.49949464 | 9.492547025 | 27.19998717 | 28.69741296 | 0.049149434 | 50.46337627 | 47.60236541 | 60.63999453 | 48.43761088 |
| 173 | hsa-miR-134     | 14.14699269 | 38.64895777 | 38.15550462 | 64.32697845 | 75.54815744 | 69.19251545 | 81.82389165 | 51.88046725 | 82.74425839 | 71.188637   | 63.22942588 | 59.50538667 |
| 172 | hsa-miR-133b    | 19.52259761 | 14.6787415  | 22.15563897 | 54.07531458 | 41.92884811 | 64.21429335 | 58.93873885 | 34.28101333 | 33.70168821 | 11.69131844 | 17.89697064 | 21.03401696 |
| 171 | hsa-miR-133a    | 8.939877383 | 22.86573269 | 30.89639649 | 46.26502242 | 48.9424022  | 87.09373856 | 59.84481408 | 33.78031423 | 59.24392977 | 24.91345251 | 44.98070342 | 14.93892968 |
| 170 | hsa-miR-1324    | 7.497226039 | 17.88770628 | 23.75463483 | 50.60148313 | 34.82191383 | 33.48911225 | 21.25402145 | 0.206838222 | 40.0102006  | 41.41964293 | 39.13352569 | 38.08941221 |
| 169 | hsa-miR-1323    | 240.2249064 | 269.0283066 | 216.5978342 | 299.4355248 | 29.2311576  | 32.13941172 | 29.21547238 | 29.69615557 | 52.98119312 | 32.58543479 | 49.89147326 | 18.4420367  |
| 168 | hsa-miR-1322    | 1.115071685 | 8.698671101 | 16.32866927 | 43.28753448 | 24.76840368 | 20.69411272 | 30.98794121 | 14.79821344 | 61.01127588 | 27.30546607 | 34.30254602 | 20.09409609 |
| 167 | hsa-miR-1321    | 0.013488178 | 12.21890765 | 12.61520572 | 46.49661374 | 12.66886445 | 44.53840018 | 30.9726645  | 19.40414099 | 695.1885614 | 701.9996199 | 700.8977607 | 784.2796302 |
| 166 | hsa-miR-132*    | 0.16570452  | 4.339314022 | 23.0203684  | 37.52013094 | 63.31203773 | 35.66355552 | 31.9806568  | 15.15388335 | 38.80807003 | 41.4681211  | 34.36369916 | 16.72999995 |
| 165 | hsa-miR-132     | 175.974068  | 187.0860312 | 176.6729678 | 239.9270137 | 876.3160084 | 817.9502108 | 795.2362482 | 830.6455881 | 536.1497083 | 207.9415502 | 247.4950901 | 263.1147329 |
| 164 | hsa-miR-130b*   | 5.325760613 | 18.57181442 | 15.41630546 | 49.44239153 | 59.21091788 | 47.56314487 | 30.40072805 | 12.26523586 | 31.13293461 | 42.52151346 | 40.86555496 | 29.26940791 |
| 163 | hsa-miR-130b    | 0.171875181 | 158.1946132 | 161.9121753 | 245.6136641 | 694.0934891 | 246.0341888 | 258.8129227 | 285.2246882 | 77.0917728  | 69.25154646 | 55.17428778 | 14.58984293 |
| 162 | hsa-miR-130a*   | 0.015571046 | 12.72429119 | 19.06078958 | 42.36114189 | 51.6285736  | 38.44593201 | 30.57232655 | 13.63122285 | 973.3009624 | 989.4440784 | 912.259569  | 999.2893219 |
| 161 | hsa-miR-130a    | 60.25639162 | 58.31114091 | 84.85987305 | 84.60031159 | 85.96617946 | 66.62075597 | 61.61142588 | 37.62355261 | 165.1259434 | 160.514845  | 150.3220229 | 103.8154903 |
| 160 | hsa-miR-1308    | 1460.549449 | 1421.806099 | 1638.152883 | 2280.657617 | 892.7170862 | 843.8620226 | 784.5352903 | 842.2415708 | 61.53838214 | 52.78185168 | 39.90768672 | 12.98545589 |
| 159 | hsa-miR-1307    | 160.1308283 | 137.4855515 | 187.2194508 | 179.1357195 | 142.5728309 | 133.3790047 | 108.7194533 | 101.6742061 | 180.6269981 | 142.4719602 | 114.0743977 | 95.20438837 |
| 158 | hsa-miR-1306    | 15.60500638 | 24.99240422 | 43.54394352 | 51.30168587 | 60.45759053 | 35.30239943 | 19.69338257 | 1.952006221 | 38.27768663 | 43.23604788 | 55.48273135 | 6.214107829 |
| 157 | hsa-miR-1305    | 148.5948084 | 110.842184  | 179.9763901 | 187.1446792 | 106.9408439 | 87.62804785 | 84.86046665 | 57.11412741 | 58.60333137 | 52.61380329 | 26.84230382 | 9.882477067 |
| 156 | hsa-miR-1304    | 6.910763416 | 18.50544951 | 55.98166961 | 44.32200724 | 42.67319449 | 29.63043946 | 5.317880397 | 2.353456974 | 37.31528467 | 26.66130208 | 11.96889392 | 0.015342962 |

|     |                |             |             |             |             |             |             |             |             |             |             |             |             |
|-----|----------------|-------------|-------------|-------------|-------------|-------------|-------------|-------------|-------------|-------------|-------------|-------------|-------------|
| 155 | hsa-miR-1303   | 9.868326957 | 21.13888105 | 47.89562421 | 49.46137526 | 55.21589699 | 40.04679508 | 40.07915506 | 19.98858699 | 73.06375284 | 55.58285953 | 32.33259855 | 27.67351338 |
| 154 | hsa-miR-1302   | 7.059869255 | 14.65688502 | 35.14177446 | 41.55774615 | 28.60714829 | 26.95637497 | 19.25069486 | 0.047126376 | 73.45305128 | 62.95180105 | 43.63203948 | 29.13495391 |
| 153 | hsa-miR-1301   | 13.72782549 | 17.60050239 | 51.92603971 | 41.34033746 | 53.55083222 | 43.64773911 | 22.34259853 | 6.058217248 | 69.3209175  | 48.26986988 | 36.26619278 | 14.09832976 |
| 152 | hsa-miR-1300   | 53.01514803 | 52.35778502 | 78.81121164 | 84.32378454 | 56.84247371 | 40.50583857 | 44.37842824 | 25.63192266 | 36.78888342 | 31.76587827 | 14.14700773 | 11.48825928 |
| 151 | hsa-miR-1299   | 9.21832652  | 17.30116863 | 39.74714098 | 43.29558576 | 39.74274202 | 48.28293174 | 14.58627927 | 11.22049783 | 43.28503254 | 46.4923288  | 9.000276244 | 8.603873109 |
| 150 | hsa-miR-1298   | 3.942626274 | 9.231824614 | 38.97189066 | 34.99958926 | 36.05605426 | 32.0335803  | 5.703778835 | 1.737705596 | 57.17394269 | 57.60464317 | 21.12544524 | 19.86036284 |
| 149 | hsa-miR-1297   | 0.011243108 | 7.741956073 | 40.68085919 | 38.04861821 | 36.67902833 | 24.35338468 | 8.928353314 | 0.040972143 | 57.20752384 | 32.59713772 | 12.28386179 | 14.36917861 |
| 148 | hsa-miR-1296   | 14.4590763  | 8.808838131 | 44.9420297  | 36.57096703 | 35.4708386  | 46.61975228 | 17.22395007 | 4.352817531 | 66.87605568 | 49.73285116 | 6.549167072 | 24.03872821 |
| 147 | hsa-miR-129-5p | 33.66416657 | 44.05952126 | 69.83742634 | 94.25195123 | 46.34671025 | 34.36442312 | 31.49002365 | 11.08010344 | 36.38626535 | 30.45141848 | 12.2158929  | 12.99058637 |
| 146 | hsa-miR-1295   | 7.548734277 | 14.65721425 | 38.05140419 | 41.49603658 | 45.44411285 | 36.58398112 | 13.53760032 | 1.343799088 | 48.98334942 | 38.64738634 | 29.80598344 | 26.33553906 |
| 145 | hsa-miR-1294   | 4.274489773 | 7.329096239 | 37.89785408 | 39.754584   | 31.48370428 | 31.86620716 | 0.046811263 | 0.04455336  | 37.05251682 | 37.87098268 | 34.90987273 | 28.41150503 |
| 144 | hsa-miR-129-3p | 11.19173187 | 14.62396643 | 43.5267496  | 50.40811393 | 57.54342734 | 42.56883571 | 31.63742051 | 14.3241688  | 57.85392873 | 37.23133982 | 21.62748439 | 29.02862959 |
| 143 | hsa-miR-1293   | 7.006084831 | 11.26400697 | 53.37737723 | 41.14926045 | 33.42597968 | 35.00506675 | 53.69129534 | 11.67789079 | 52.61241425 | 38.2692201  | 66.56827839 | 31.31050994 |
| 142 | hsa-miR-1292   | 17.2277994  | 6.548762194 | 39.9470597  | 39.52142244 | 50.43989407 | 49.39950361 | 31.13202714 | 26.55243267 | 89.42980383 | 55.97505807 | 39.90256621 | 48.20473761 |
| 141 | hsa-miR-1291   | 0.896530586 | 5.261780341 | 46.58515221 | 39.47364454 | 39.64625383 | 37.16256949 | 59.3279501  | 7.604534052 | 44.96939003 | 49.20480094 | 26.56502653 | 39.15404954 |
| 140 | hsa-miR-1290   | 578.2699315 | 388.2418767 | 507.2110824 | 503.6981191 | 44.32749037 | 35.39199294 | 24.60034516 | 20.56344852 | 64.36543924 | 35.2623136  | 28.03009511 | 39.08397743 |
| 139 | hsa-miR-129*   | 6.843054423 | 4.665138987 | 39.25944196 | 39.13044675 | 46.52145616 | 52.33060437 | 29.81955483 | 27.2070482  | 51.40995646 | 31.77970058 | 19.35590389 | 27.35212276 |
| 138 | hsa-miR-1289   | 1468.280221 | 1474.746723 | 3058.329135 | 1796.485495 | 50.98629665 | 44.58569793 | 14.95402285 | 14.91894423 | 40.29918592 | 40.29918592 | 21.2189519  | 34.30046762 |
| 137 | hsa-miR-1288   | 6.582830274 | 7.121950574 | 33.93656295 | 35.54242821 | 65.25969915 | 43.64467055 | 14.99933534 | 11.99508887 | 66.80320412 | 48.71383711 | 26.94917877 | 36.56322808 |
| 136 | hsa-miR-1287   | 2.859235023 | 20.97147075 | 37.93886554 | 30.12496785 | 49.02608524 | 32.90152736 | 12.66953149 | 14.60368359 | 117.9792663 | 52.17206564 | 44.93053329 | 29.13355527 |
| 135 | hsa-miR-1286   | 3.067609911 | 14.27258418 | 37.39079452 | 40.03296366 | 57.279367   | 35.73116921 | 11.80553776 | 6.237521053 | 59.47663068 | 29.24169541 | 12.35729458 | 24.19185669 |
| 134 | hsa-miR-1285   | 7.174600355 | 17.82634927 | 33.91374578 | 39.87438398 | 147.7712365 | 38.60875171 | 28.08219525 | 21.80630283 | 77.52047194 | 30.0104765  | 30.91680569 | 19.81954862 |
| 133 | hsa-miR-1284   | 182.6219908 | 301.9901477 | 153.3427811 | 166.3291423 | 124.7557694 | 50.73120561 | 17.54135821 | 21.31661463 | 32.54984191 | 5.357369582 | 15.33069145 | 0.015059996 |
| 132 | hsa-miR-1283   | 0.015094046 | 19.1099561  | 41.97107485 | 44.79247817 | 120.1406111 | 27.55877413 | 13.85443201 | 0.043999167 | 980.6844986 | 945.9950773 | 952.4640186 | 1025.631018 |
| 131 | hsa-miR-1282   | 509.2846823 | 997.8457823 | 809.4756985 | 597.2354904 | 31.68760148 | 28.97830074 | 0.049842423 | 0.047423961 | 1807.048233 | 1669.622945 | 1733.029219 | 1876.586487 |
| 130 | hsa-miR-1281   | 74.05392297 | 92.17599917 | 97.75991104 | 88.92097535 | 304.7096896 | 290.5183722 | 251.8289125 | 390.6685517 | 381.7871841 | 605.9924192 | 380.7267825 | 331.2167919 |
| 129 | hsa-miR-1280   | 288.9934998 | 314.8638199 | 346.8301446 | 344.2430411 | 1542.9974   | 1492.932113 | 1391.189366 | 1587.773986 | 31.83221737 | 23.44836152 | 21.19519499 | 13.38991343 |
| 128 | hsa-miR-128    | 351.3112302 | 641.9845825 | 431.0555544 | 352.9971207 | 388.4067322 | 595.6570686 | 391.4639138 | 368.7424549 | 34.91952396 | 21.31985194 | 12.81338573 | 9.755818347 |
| 127 | hsa-miR-1279   | 18.91598925 | 41.62888829 | 58.37063716 | 39.01937478 | 28.26280399 | 16.08356793 | 0.044840159 | 16.61016438 | 61.46111952 | 50.97056657 | 24.16113773 | 17.35385802 |
| 126 | hsa-miR-1278   | 12.33671997 | 37.45748811 | 31.1753504  | 27.41453291 | 38.01019082 | 26.51831462 | 2.275950381 | 31.24786175 | 67.16562308 | 41.45438963 | 32.89655871 | 25.45963633 |
| 125 | hsa-miR-1277   | 1820.749127 | 3185.395579 | 2358.795776 | 1372.467084 | 33.27542405 | 11.67930928 | 14.2864403  | 19.14612293 | 44.89429312 | 35.82489349 | 14.47853596 | 10.48280316 |
| 124 | hsa-miR-1276   | 5.62290099  | 36.91164978 | 39.37011914 | 32.67686195 | 40.05913576 | 27.24461856 | 17.6577783  | 37.75125034 | 342.6998636 | 322.5282965 | 294.2257687 | 284.8863026 |
| 123 | hsa-miR-127-5p | 5.714247921 | 28.67019419 | 38.41729824 | 37.46846663 | 38.84405118 | 27.03784487 | 1.13529789  | 31.97549691 | 89.33342909 | 76.73497476 | 60.85463217 | 50.00913767 |
| 122 | hsa-miR-1275   | 3667.91234  | 3836.978486 | 4135.533386 | 5488.919959 | 257.3899667 | 238.0575124 | 213.5744577 | 224.6126525 | 72.45996912 | 43.9658215  | 34.26276452 | 32.46903467 |
| 121 | hsa-miR-1274b  | 22.79619265 | 37.13084323 | 45.42989862 | 42.56093634 | 69.31840176 | 52.06631402 | 43.52678273 | 52.70950221 | 53.15915621 | 18.7844428  | 11.61237705 | 11.16838932 |
| 120 | hsa-miR-1274a  | 11.87244761 | 34.14006845 | 40.09840298 | 34.44666323 | 57.72079317 | 47.42558624 | 13.97183128 | 35.75602134 | 40.18141575 | 8.088604078 | 10.49718316 | 21.66601641 |
| 119 | hsa-miR-127-3p | 6.482929725 | 27.51999542 | 33.22038243 | 25.50994074 | 32.95376984 | 20.62104356 | 17.77989619 | 21.91256048 | 28.10988165 | 18.19736118 | 2.831947968 | 14.65891488 |
| 118 | hsa-miR-1273   | 16.11690512 | 37.36513536 | 43.68548739 | 39.96540705 | 25.02466447 | 0.063520177 | 0.111100661 | 22.76460205 | 60.59160581 | 48.43188017 | 29.71967998 | 32.83028169 |
| 117 | hsa-miR-1272   | 16.3252442  | 41.82065857 | 28.63491257 | 39.50988628 | 24.30524864 | 7.084213702 | 5.086698517 | 12.40977564 | 109.3473992 | 94.44653292 | 62.19434785 | 78.44205403 |
| 116 | hsa-miR-1271   | 4.97043312  | 27.28611211 | 32.41152286 | 38.33181286 | 31.52859113 | 14.94061192 | 18.70131379 | 40.20695432 | 17.9911668  | 35.44392482 | 14.43002817 | 76.90505841 |
| 115 | hsa-miR-1270   | 1.121961482 | 29.89349113 | 36.19459177 | 40.54092781 | 42.22688174 | 64.91661356 | 29.16173608 | 60.86904482 | 386.9186721 | 408.3505537 | 397.344583  | 385.5889179 |
| 114 | hsa-miR-1269   | 11.24943073 | 22.14878108 | 34.30230399 | 28.13746359 | 26.04621738 | 28.713922   | 11.56014652 | 25.9979959  | 30.33037587 | 21.47320344 | 20.58786192 | 35.86450558 |
| 113 | hsa-miR-1268   | 182.9476448 | 198.0609142 | 210.3591929 | 211.1398478 | 336.9379082 | 360.6044505 | 323.3144181 | 303.6752975 | 48.00757209 | 29.81621843 | 24.93097756 | 50.5990574  |
| 112 | hsa-miR-1267   | 11.80375471 | 38.98912411 | 37.66597076 | 43.39427762 | 24.98621649 | 10.20380399 | 12.89464026 | 38.78909157 | 34.8697084  | 17.88369591 | 37.2540797  | 39.75461119 |
| 111 | hsa-miR-1266   | 0.011551049 | 28.32922017 | 26.31026965 | 31.13057528 | 32.71942599 | 14.3009022  | 22.0772238  | 38.46134872 | 29.67994837 | 23.29073892 | 44.87269297 | 38.75582029 |
| 110 | hsa-miR-1265   | 10.34698152 | 23.50722441 | 33.01385845 | 28.98335992 | 24.41233682 | 18.06990648 | 32.65288463 | 31.15971656 | 42.07115279 | 26.81704268 | 30.23838733 | 51.3684214  |
| 109 | hsa-miR-1264   | 0.012720847 | 24.07625964 | 34.38302012 | 31.9585733  | 28.54695009 | 16.65006958 | 35.31010384 | 24.58155723 | 78.69310178 | 16.37988581 | 27.75283114 | 33.36200782 |

|     |                 |             |             |             |             |             |             |             |             |             |             |             |             |
|-----|-----------------|-------------|-------------|-------------|-------------|-------------|-------------|-------------|-------------|-------------|-------------|-------------|-------------|
| 108 | hsa-miR-1263    | 3.594491111 | 23.58034833 | 28.66547727 | 33.03148013 | 36.76993241 | 31.11836955 | 18.83444112 | 34.89754767 | 53.25668166 | 22.48043428 | 20.41546492 | 38.16534365 |
| 107 | hsa-miR-1262    | 0.935744449 | 19.19243235 | 27.83244792 | 32.11951049 | 42.6178805  | 0.942498846 | 14.76643175 | 22.03687093 | 172.5822785 | 119.735558  | 114.8289079 | 91.69349196 |
| 105 | hsa-miR-1260    | 18.4045101  | 36.9630128  | 37.57903344 | 30.70012238 | 158.4119558 | 114.2485045 | 124.535671  | 81.82233796 | 43.91039222 | 11.39689173 | 15.11192831 | 41.37017876 |
| 104 | hsa-miR-126*    | 0.68500423  | 35.4534718  | 36.31507263 | 25.6345397  | 68.33797894 | 22.2723155  | 0.053444325 | 29.28745482 | 184.2904032 | 74.11346975 | 75.03401946 | 90.53104323 |
| 103 | hsa-miR-126     | 37.10428228 | 56.62369413 | 47.22007343 | 52.7579476  | 275.8560704 | 81.04517971 | 78.35196567 | 94.11192645 | 92.15139775 | 35.01646062 | 44.35134284 | 51.09841154 |
| 102 | hsa-miR-125b-2* | 0.015169054 | 28.46935961 | 26.6117034  | 31.5789153  | 89.25987064 | 40.16892793 | 35.05296981 | 49.24245274 | 18.43797911 | 18.02423307 | 20.01622158 | 32.16456169 |
| 101 | hsa-miR-125b-1* | 0.011839546 | 20.11715287 | 37.75900692 | 29.60077856 | 8.918373276 | 28.01253882 | 0.366221431 | 17.55968716 | 665.6507043 | 761.2849396 | 726.5272481 | 634.3172129 |
| 100 | hsa-miR-125b    | 359.7103744 | 450.0358264 | 436.751764  | 400.5390426 | 794.600583  | 892.2893865 | 794.6699255 | 718.7319271 | 1100.059566 | 1196.449666 | 1268.599222 | 1120.989764 |
| 99  | hsa-miR-125a-5p | 224.2541359 | 240.9123344 | 278.6617406 | 247.3321812 | 1064.181951 | 1122.917215 | 1099.70216  | 1047.098413 | 132.0495649 | 118.900525  | 134.4300589 | 97.25977912 |
| 98  | hsa-miR-125a-3p | 18.72360081 | 33.03705772 | 41.17857791 | 39.61287491 | 86.37609972 | 99.7649638  | 86.60031598 | 85.33879106 | 34.41202392 | 35.29067775 | 24.44745609 | 37.31022431 |
| 97  | hsa-miR-1259    | 1212.564409 | 2659.499637 | 1616.044219 | 1343.159524 | 30.63332963 | 37.37456994 | 8.900017254 | 29.06175843 | 10.98032307 | 22.95277581 | 29.26423264 | 33.39927137 |
| 95  | hsa-miR-1257    | 0.011580363 | 9.593107875 | 30.84331141 | 25.5634117  | 28.65003822 | 33.71236868 | 18.23011513 | 24.857317   | 38.15421958 | 35.36419113 | 31.68626058 | 22.99069723 |
| 93  | hsa-miR-1255b   | 12.09982099 | 21.6893456  | 27.95384008 | 46.35516656 | 40.45051174 | 4.264378782 | 16.57391384 | 0.047550851 | 31.80854569 | 24.59035711 | 34.48713261 | 0.015445367 |
| 92  | hsa-miR-1255a   | 9.604128258 | 24.23669218 | 28.32366931 | 40.37445811 | 63.64255315 | 8.720994231 | 35.97845733 | 2.076068357 | 25.56396603 | 12.28713702 | 29.10422141 | 1.101253157 |
| 91  | hsa-miR-1254    | 13.68788984 | 23.06138821 | 25.81878348 | 46.86230275 | 44.18508978 | 20.66082215 | 43.08885121 | 7.047482566 | 40.36029094 | 42.86683433 | 46.2643497  | 12.24659212 |
| 90  | hsa-miR-1253    | 16.97326297 | 30.34601241 | 20.47995749 | 50.75535377 | 37.71034437 | 24.06531807 | 38.63236527 | 0.042492672 | 12.93562817 | 28.3475645  | 21.07027424 | 4.692594714 |
| 89  | hsa-miR-1252    | 0.011911138 | 14.93214117 | 17.74393363 | 57.50143809 | 24.28636158 | 13.10229894 | 21.25186761 | 0.047203423 | 21.39936179 | 14.1075083  | 22.06721961 | 0.015321054 |
| 88  | hsa-miR-1251    | 6.21015752  | 21.01482071 | 17.44500632 | 46.98589269 | 20.076194   | 25.75853112 | 26.52371443 | 0.040749062 | 28.88180948 | 18.33902072 | 30.69650756 | 7.92035567  |
| 87  | hsa-miR-1250    | 11.51934582 | 24.79004512 | 29.25047072 | 47.96074945 | 25.89755745 | 25.34516212 | 34.13792628 | 6.107896477 | 31.21706224 | 28.0984914  | 22.29592108 | 7.140317765 |
| 86  | hsa-miR-1249    | 41.27912452 | 47.6747076  | 42.39541377 | 63.87666909 | 74.06788309 | 81.8717095  | 72.30200848 | 59.37203609 | 89.31063306 | 84.46272634 | 77.98823655 | 49.80077341 |
| 85  | hsa-miR-1248    | 3.286058672 | 23.48629811 | 25.67656023 | 53.57758196 | 38.23077448 | 29.33399323 | 26.19678957 | 0.047709803 | 31.98345744 | 18.08960589 | 17.87973962 | 0.067613601 |
| 84  | hsa-miR-1247    | 19.9480017  | 31.98653907 | 40.94152418 | 58.76919716 | 69.66741256 | 57.4625744  | 70.80321704 | 44.89096047 | 72.17626081 | 49.83590157 | 52.89693358 | 44.75450103 |
| 83  | hsa-miR-1246    | 16089.0454  | 17137.14797 | 17446.57764 | 20728.22141 | 2647.288725 | 2021.415417 | 2331.089567 | 2541.003641 | 3345.009419 | 2799.330868 | 3123.345603 | 3426.728886 |
| 82  | hsa-miR-1245    | 3.393990634 | 22.16012027 | 41.60453965 | 47.53139655 | 41.07855089 | 21.16903313 | 30.20558397 | 4.568853112 | 38.38159482 | 18.34163031 | 25.06135102 | 7.797972206 |
| 81  | hsa-miR-1244    | 0.01250992  | 22.98932297 | 26.88444762 | 43.88387524 | 60.87552763 | 36.4040202  | 36.13133971 | 22.7765332  | 39.74518182 | 17.17971093 | 23.6415098  | 7.911578261 |
| 80  | hsa-miR-1243    | 6.686056684 | 19.4541875  | 20.8609505  | 56.78978615 | 88.30980269 | 9.985628208 | 23.5594957  | 0.048859445 | 72.63899857 | 14.35423248 | 52.86593126 | 0.015777056 |
| 79  | hsa-miR-124*    | 3.482402682 | 15.26232685 | 26.21358284 | 50.52230377 | 31.27433142 | 13.04215197 | 26.91972815 | 0.04397106  | 40.99849369 | 18.47966516 | 26.32364752 | 7.927681618 |
| 78  | hsa-miR-124     | 4.351186266 | 18.23895498 | 23.29785578 | 47.55714936 | 38.81075545 | 8.748838004 | 26.76032177 | 6.888625284 | 46.62962703 | 22.77919707 | 36.89939234 | 8.659711032 |
| 77  | hsa-miR-1238    | 36.22962186 | 35.1314232  | 38.19442199 | 59.38798699 | 81.44557945 | 54.59101045 | 62.76025726 | 43.89417405 | 93.15796005 | 93.78467004 | 89.68667971 | 69.47255486 |
| 76  | hsa-miR-1237    | 14.32966633 | 37.61833196 | 36.13377565 | 57.37341173 | 83.98448263 | 69.94336877 | 66.54509862 | 51.7766344  | 107.2440558 | 97.48920842 | 96.79549014 | 70.63804912 |
| 75  | hsa-miR-1236    | 3.023346303 | 21.88445647 | 21.80608408 | 50.07038663 | 49.6396768  | 23.61739219 | 36.84392386 | 23.90265874 | 35.91035561 | 24.45105757 | 37.50965951 | 28.23011987 |
| 74  | hsa-miR-1234    | 23.06062711 | 38.46024003 | 31.6302578  | 64.55316039 | 244.8546422 | 252.3402629 | 260.4154614 | 229.7663726 | 233.6466243 | 212.9774741 | 213.4224286 | 217.8282241 |
| 73  | hsa-miR-1233    | 11.90586414 | 21.48767191 | 22.99959184 | 45.2864162  | 44.90189574 | 35.69521971 | 34.9477967  | 24.20774215 | 50.26569527 | 37.89215016 | 51.97824475 | 43.32019624 |
| 72  | hsa-miR-1231    | 86.19027525 | 78.34174405 | 70.29939483 | 107.8236944 | 43.42703697 | 29.45456856 | 31.75061677 | 22.98761191 | 56.80431585 | 29.56036868 | 54.05490647 | 51.57494992 |
| 71  | hsa-miR-1229    | 9.123799588 | 26.6074388  | 26.49918931 | 54.49939647 | 90.75071629 | 67.42112837 | 74.48049939 | 49.27820269 | 88.10641413 | 70.02284217 | 69.97148335 | 65.05557114 |
| 70  | hsa-miR-1228*   | 68.90446818 | 62.78550932 | 43.36835348 | 109.3387949 | 60.71465333 | 42.86554139 | 44.52880844 | 17.41179063 | 112.3956229 | 79.90839117 | 78.98703668 | 64.42171927 |
| 69  | hsa-miR-1228    | 24.64489304 | 35.17024792 | 30.59972923 | 53.13257124 | 126.4213008 | 91.61505828 | 94.76977801 | 74.54095238 | 281.526828  | 228.5766374 | 239.3032291 | 223.3462067 |
| 68  | hsa-miR-1227    | 11.73326655 | 24.35121449 | 26.07252247 | 46.5073132  | 155.9203105 | 44.9030425  | 47.31102818 | 39.88768598 | 136.4846767 | 51.85082635 | 66.88897726 | 44.21960407 |
| 67  | hsa-miR-1226*   | 0.012559242 | 21.96723204 | 24.08041632 | 42.10492582 | 40.14958827 | 41.11799981 | 32.32736363 | 22.43957614 | 55.17967153 | 42.71366195 | 58.07231605 | 49.20438866 |
| 66  | hsa-miR-1226    | 20.30419733 | 29.96885733 | 25.00969052 | 64.14402375 | 137.600091  | 41.80102645 | 45.57818657 | 26.57549401 | 85.28658635 | 34.93362328 | 47.7946146  | 39.09688975 |
| 65  | hsa-miR-1225-5p | 0.012409753 | 20.26951635 | 15.5860651  | 46.96106695 | 48.76357145 | 50.65255489 | 24.79987101 | 6.658447948 | 54.69280846 | 37.44565439 | 42.51624176 | 42.21069935 |
| 64  | hsa-miR-1225-3p | 2.160720821 | 26.07327474 | 32.61112945 | 54.17578756 | 84.01406201 | 56.19284719 | 47.39365703 | 33.42229095 | 70.88245526 | 65.39780417 | 69.3695774  | 53.42561703 |
| 63  | hsa-miR-1224-5p | 101.4881773 | 79.25782623 | 132.8941671 | 139.5581752 | 88.39823415 | 71.92122819 | 56.52393495 | 38.57944978 | 116.7498568 | 96.56426458 | 95.9386535  | 43.66301889 |
| 62  | hsa-miR-1224-3p | 18.38226395 | 26.38199345 | 43.39946253 | 43.72238345 | 57.11911655 | 54.53405073 | 32.71611562 | 27.97068571 | 61.68450962 | 48.9265756  | 45.47473554 | 21.92181814 |
| 61  | hsa-miR-122*    | 8.364984935 | 18.34378566 | 41.65641122 | 41.7733084  | 33.32355842 | 23.66572423 | 11.85709832 | 0.048758286 | 25.92250263 | 25.70876742 | 11.6771629  | 0.015791351 |
| 60  | hsa-miR-122     | 16.41196582 | 21.66986852 | 50.60552786 | 48.85652029 | 22.60094788 | 17.75552951 | 0.048984577 | 0.044662486 | 45.60498228 | 42.52331641 | 37.81206067 | 6.794225439 |
| 59  | hsa-miR-1208    | 35.36570589 | 36.52349233 | 56.43088983 | 64.55356981 | 51.15896383 | 61.86059556 | 29.13698735 | 19.30355027 | 73.37409514 | 69.98256728 | 52.4478597  | 32.00319618 |

|    |                 |             |             |             |             |             |             |             |             |             |             |              |             |
|----|-----------------|-------------|-------------|-------------|-------------|-------------|-------------|-------------|-------------|-------------|-------------|--------------|-------------|
| 58 | hsa-miR-1207-5p | 50.89210096 | 41.20270386 | 86.46114175 | 81.71188888 | 50.53157967 | 58.92324279 | 33.04570527 | 23.33360768 | 78.76908799 | 67.19485458 | 73.54016442  | 31.71739836 |
| 57 | hsa-miR-1207-3p | 19.97945931 | 18.75003075 | 43.14974964 | 41.9330393  | 34.78353096 | 32.28312558 | 12.85366721 | 7.476818318 | 45.87138647 | 35.50272622 | 22.96704333  | 1.683440879 |
| 56 | hsa-miR-1206    | 14.75029999 | 8.965661483 | 49.14810547 | 41.49688923 | 29.84604746 | 27.94136034 | 0.056793297 | 0.041608048 | 30.10990865 | 23.5175649  | 30.44671416  | 6.481077337 |
| 55 | hsa-miR-1205    | 0.685509636 | 13.61693776 | 51.12737658 | 44.7121587  | 30.31589225 | 31.23389999 | 14.17457369 | 0.042660457 | 41.88831763 | 29.62150108 | 50.0454885   | 7.35015336  |
| 54 | hsa-miR-1204    | 18.54543519 | 19.8660093  | 69.31009513 | 50.99189492 | 18.82162432 | 30.38217921 | 2.922042812 | 6.448099625 | 28.12145062 | 19.08477507 | 8.579595702  | 0.016679626 |
| 53 | hsa-miR-1203    | 17.27703929 | 19.57082309 | 43.60522043 | 50.68305011 | 42.70069917 | 26.73349781 | 4.86122977  | 0.03949972  | 42.78368947 | 38.24142487 | 34.14627736  | 12.71836782 |
| 52 | hsa-miR-1202    | 17.08396364 | 15.08931826 | 47.21995403 | 47.26411572 | 48.67881386 | 52.31426488 | 32.94509562 | 10.68644292 | 94.14916927 | 72.3829042  | 52.56511671  | 30.22992273 |
| 51 | hsa-miR-1201    | 9.126979899 | 15.72665878 | 52.91609576 | 42.73882309 | 35.96160943 | 36.73114378 | 21.56008475 | 13.12234934 | 26.40154113 | 28.1377396  | 29.03185067  | 3.175051197 |
| 50 | hsa-miR-1200    | 12.3514221  | 10.76075035 | 40.7069493  | 41.77088484 | 35.70199614 | 32.69574291 | 19.91813047 | 0.044006235 | 27.44628142 | 19.99509199 | 19.37422577  | 11.03978155 |
| 49 | hsa-miR-1197    | 8.291257491 | 12.52744881 | 44.10401266 | 41.38590365 | 30.40931649 | 28.17804862 | 12.41501814 | 4.05248034  | 30.35031329 | 23.55340575 | 0.66665096   | 5.401405014 |
| 48 | hsa-miR-1185    | 5.299320147 | 13.94152103 | 39.10146168 | 44.2958776  | 33.99850283 | 27.12706616 | 16.40208495 | 2.6915037   | 30.83865049 | 25.19748138 | 17.78744617  | 13.32324203 |
| 47 | hsa-miR-1184    | 19.11620661 | 17.59055153 | 57.65762361 | 38.01177673 | 15.38568935 | 23.93557507 | 0.111092507 | 0.042865619 | 23.15406906 | 22.4397815  | 15.97597055  | 17.66287317 |
| 46 | hsa-miR-1183    | 4.307165227 | 18.56502168 | 37.74053113 | 48.88440853 | 29.77466375 | 19.33982717 | 22.51276995 | 10.58223066 | 65.81545861 | 52.75557919 | 42.96445437  | 39.68268434 |
| 45 | hsa-miR-1182    | 16.95731263 | 29.74075248 | 54.75901934 | 61.32686361 | 47.58019772 | 42.72779459 | 28.71133568 | 28.1410108  | 64.39141274 | 59.05670375 | 53.81882578  | 45.84002339 |
| 44 | hsa-miR-1181    | 24.15850062 | 28.57109491 | 46.1951007  | 46.15192766 | 63.55912898 | 59.9355227  | 46.17511746 | 50.26000619 | 64.23361567 | 56.21438389 | 41.0114092   | 55.74895951 |
| 43 | hsa-miR-1180    | 31.6415351  | 28.17849097 | 91.98456962 | 65.37973163 | 179.4510979 | 179.5909393 | 385.5051711 | 164.0335713 | 152.8826003 | 158.140537  | 317.6736179  | 167.0247086 |
| 42 | hsa-miR-1179    | 0.011561272 | 11.00790336 | 48.33141939 | 40.34073007 | 28.83644154 | 21.76652033 | 28.81258146 | 8.6982404   | 33.89171601 | 14.66602222 | 49.22374472  | 26.40209175 |
| 41 | hsa-miR-1178    | 11.87301089 | 11.40699924 | 40.86599488 | 36.88121978 | 37.58982937 | 24.17981692 | 30.11227277 | 18.27802194 | 19.3635874  | 20.90305758 | 20.85138981  | 27.90023804 |
| 40 | hsa-miR-10b*    | 1.776807556 | 18.64837222 | 33.99686488 | 45.76760243 | 27.9751502  | 22.50238474 | 3.904994227 | 4.45941227  | 41.59891491 | 34.62881357 | 24.57315832  | 34.93957982 |
| 39 | hsa-miR-10b     | 6.343281815 | 20.58969121 | 53.39055294 | 50.36606823 | 43.15654961 | 40.03700334 | 74.35671413 | 16.27926489 | 24.94921942 | 22.31324189 | 45.09564175  | 34.81524864 |
| 38 | hsa-miR-10a*    | 0.813719807 | 21.82642359 | 57.08908489 | 47.92218805 | 69.97524276 | 21.87993844 | 14.53258822 | 1.827116795 | 69.92549541 | 38.80050928 | 21.95347998  | 17.44451812 |
| 37 | hsa-miR-10a     | 40.38909788 | 40.35878031 | 63.12214172 | 74.28066358 | 198.0875102 | 71.19671599 | 69.12178741 | 73.02312103 | 138.4688349 | 70.34530565 | 57.024078    | 60.52361165 |
| 36 | hsa-miR-107     | 841.9493094 | 415.7926024 | 688.7737162 | 586.0750912 | 2101.883194 | 605.366095  | 786.5190089 | 644.6393559 | 1389.417904 | 445.6460423 | 631.5065756  | 534.9422522 |
| 35 | hsa-miR-106b*   | 1.97958024  | 20.12315449 | 40.58189382 | 40.23844669 | 129.5748594 | 91.47866827 | 88.22748644 | 72.45072161 | 96.27130167 | 73.79995214 | 66.67132424  | 82.59732048 |
| 34 | hsa-miR-106b    | 514.450962  | 294.7309061 | 494.9130859 | 363.3234319 | 2959.428461 | 898.6015689 | 1259.828348 | 877.8159296 | 2448.218729 | 790.1587832 | 1140.835793  | 827.2982334 |
| 33 | hsa-miR-106a*   | 7.26904452  | 35.71120511 | 41.60828303 | 42.67593501 | 12.54543937 | 15.76887956 | 0.053595352 | 0.044526697 | 33.16905017 | 23.16905017 | 0.017926241  | 0.014619255 |
| 32 | hsa-miR-106a    | 1733.966723 | 2355.074109 | 2132.345506 | 1917.309593 | 3137.789301 | 3455.174984 | 2869.902821 | 3393.517733 | 3361.423212 | 4054.854224 | 3428.810158  | 3737.674618 |
| 31 | hsa-miR-105*    | 7.210444432 | 37.29914199 | 39.06775674 | 26.01950563 | 21.44267277 | 0.065517519 | 22.59534138 | 5.997288232 | 27.73435086 | 20.38557495 | 0.018038707  | 5.986891963 |
| 30 | hsa-miR-105     | 15.55713651 | 43.78128302 | 39.25444247 | 35.48800968 | 47.35691053 | 58.05098149 | 43.3470336  | 48.77091545 | 58.75720583 | 59.15698154 | 39.80273105  | 28.93168267 |
| 29 | hsa-miR-103-as  | 13.73937002 | 52.1015861  | 37.95075158 | 36.41489174 | 72.82872954 | 129.2421541 | 42.23059031 | 55.38741482 | 48.20410282 | 100.5543416 | 37.91314519  | 33.73220135 |
| 28 | hsa-miR-103-2*  | 18.59296274 | 31.728601   | 42.61326644 | 43.52756509 | 42.79853233 | 47.23497215 | 16.80722211 | 36.81265484 | 33.1448378  | 38.59910908 | 11.73105943  | 12.22612509 |
| 27 | hsa-miR-103     | 454.9241548 | 898.6689084 | 670.4430747 | 495.3755672 | 811.5093939 | 1345.981895 | 991.528641  | 776.6609065 | 651.0592349 | 1114.675578 | 796.2118657  | 511.1978021 |
| 26 | hsa-miR-101*    | 16.14280286 | 39.21336481 | 44.3780009  | 29.89718248 | 23.48865965 | 48.01083955 | 1.545691937 | 25.24360273 | 36.16787015 | 52.86674982 | 56.610968308 | 13.00207353 |
| 25 | hsa-miR-101     | 2.862248294 | 40.96437728 | 43.83010934 | 38.10445137 | 128.7629643 | 62.8852538  | 27.31354529 | 40.81806588 | 106.801864  | 105.1489961 | 25.27961399  | 10.41891454 |
| 24 | hsa-miR-100*    | 8.959234892 | 37.08628449 | 45.10701203 | 31.55150882 | 23.15861949 | 59.10494887 | 0.112634742 | 16.35489003 | 26.97093605 | 58.23805222 | 5.09432195   | 9.234567879 |
| 23 | hsa-miR-100     | 492.9501845 | 580.3145386 | 654.5888319 | 553.7726059 | 479.8832079 | 504.402393  | 510.625386  | 456.178566  | 524.3068142 | 562.5342866 | 528.2797653  | 506.6560332 |
| 22 | hsa-miR-1       | 3.814929277 | 24.48633585 | 25.60064277 | 31.69282248 | 64.16753824 | 75.78557309 | 92.63640521 | 90.51453168 | 235.459302  | 254.3119564 | 231.514457   | 199.995115  |
| 21 | hsa-let-7i*     | 9.866870332 | 32.54251504 | 32.6445073  | 31.21495138 | 30.07237309 | 24.98273272 | 14.6286707  | 25.3549461  | 30.47495751 | 30.26972393 | 7.713722263  | 23.60372472 |
| 20 | hsa-let-7i      | 4960.198818 | 5683.536023 | 6019.414415 | 6751.610872 | 3869.805525 | 3868.613791 | 3624.333639 | 4189.782637 | 3781.48167  | 4177.246724 | 3938.734103  | 4559.514721 |
| 19 | hsa-let-7g*     | 13.26121832 | 25.59193785 | 34.70764717 | 30.08919367 | 43.63232943 | 23.97973772 | 22.9041367  | 24.10268529 | 48.31979614 | 38.12377843 | 24.07200501  | 38.34846731 |
| 18 | hsa-let-7g      | 2480.822944 | 6958.426027 | 3376.660323 | 3009.624437 | 2034.329332 | 6556.061996 | 2123.736938 | 1960.46409  | 2180.442076 | 6385.15224  | 2442.674837  | 2184.820052 |
| 17 | hsa-let-7f-2*   | 2.058999039 | 22.37014902 | 38.41271805 | 37.27418649 | 17.19395009 | 20.62808689 | 14.97046643 | 32.00375753 | 20.08086033 | 24.22191108 | 2.866910281  | 34.69331601 |
| 16 | hsa-let-7f-1*   | 17.60699846 | 34.57751548 | 43.90862802 | 39.08718984 | 43.71940446 | 43.88630351 | 36.45954419 | 36.55783877 | 44.19542491 | 37.1764627  | 32.40256677  | 51.51322106 |
| 15 | hsa-let-7f      | 4946.655635 | 6089.653263 | 6150.094581 | 6294.904251 | 4868.079049 | 4979.409524 | 4712.063189 | 5195.25468  | 5282.243018 | 5840.36405  | 5684.490549  | 6221.546936 |
| 14 | hsa-let-7e*     | 8.994846264 | 20.05347763 | 23.33800214 | 35.81319771 | 37.45475182 | 41.28825878 | 20.90630298 | 34.94111181 | 39.26900971 | 47.04007428 | 21.02452068  | 39.64108885 |
| 13 | hsa-let-7e      | 2834.663445 | 2965.027289 | 4151.384355 | 3132.261849 | 1537.821714 | 1443.737434 | 1957.207573 | 1396.083144 | 2037.143598 | 2007.687177 | 2591.934837  | 1921.354015 |
| 12 | hsa-let-7d*     | 106.0430892 | 148.7940628 | 150.3848202 | 116.63974   | 344.0257817 | 333.3920577 | 345.1920363 | 303.1631721 | 304.7133118 | 349.5289222 | 345.036332   | 285.7582121 |

|    |               |             |             |             |             |             |             |             |             |             |             |             |             |
|----|---------------|-------------|-------------|-------------|-------------|-------------|-------------|-------------|-------------|-------------|-------------|-------------|-------------|
| 11 | hsa-let-7d    | 4762.881758 | 5258.20365  | 5454.337114 | 6328.820351 | 3371.419252 | 3194.199215 | 3044.086943 | 3536.07714  | 3801.422186 | 3896.362553 | 3830.32881  | 4229.478977 |
| 10 | hsa-let-7c*   | 9.303500883 | 19.54750852 | 22.74156259 | 29.88139204 | 39.87361358 | 42.08523886 | 26.98935768 | 31.6567584  | 27.74074922 | 26.163146   | 29.40670525 | 40.27199838 |
| 9  | hsa-let-7c    | 5369.570679 | 5538.501534 | 5784.356518 | 7169.248802 | 3878.793696 | 3253.186453 | 3017.762716 | 4022.51392  | 5250.510896 | 4795.768282 | 4726.253953 | 5970.985438 |
| 8  | hsa-let-7b*   | 54.68394631 | 55.47607017 | 57.02345145 | 55.19227188 | 169.9387531 | 127.0978151 | 121.0507104 | 101.9724547 | 109.6063175 | 104.877665  | 107.2940643 | 111.4396166 |
| 7  | hsa-let-7b    | 4060.782394 | 4250.876262 | 4531.402645 | 5106.267403 | 2859.317712 | 2118.691779 | 2158.929895 | 2838.327618 | 3985.310473 | 3903.105139 | 3791.700099 | 4510.207876 |
| 6  | hsa-let-7a-2* | 0.01527069  | 22.01736219 | 28.55717145 | 30.45961359 | 89.8562297  | 49.59187602 | 26.82163342 | 40.80685322 | 52.51647832 | 34.21267811 | 30.06001013 | 46.15758874 |
| 5  | hsa-let-7a*   | 0.245417565 | 17.80372382 | 44.37877343 | 30.08457025 | 43.55906802 | 31.43432538 | 0.053657454 | 13.15198577 | 46.99759968 | 10.31482082 | 6.179772075 | 17.05123332 |
| 4  | hsa-let-7a    | 6221.541803 | 7439.243177 | 7795.387536 | 8727.004311 | 5303.407735 | 5428.009382 | 4823.744708 | 5928.163453 | 6173.405309 | 6913.277358 | 6563.21928  | 7816.911532 |
| 3  | E3_001        | 35.9733636  | 26.23821519 | 23.48536177 | 0.012503957 | 33.6726762  | 9.731724303 | 8.616099887 | 14.72374358 | 24.01236105 | 9.345312337 | 2.443982014 | 0.132980165 |
| 2  | E2_001        | 38.45593729 | 31.04559927 | 25.73863765 | 5.178659719 | 57.19903111 | 41.40287101 | 28.14852254 | 30.74931662 | 32.26878029 | 47.44964095 | 16.09168969 | 15.4192403  |
| 1  | E1_17A        | 45.32256248 | 40.87297149 | 32.98457974 | 3.033925259 | 85.01745361 | 70.26676049 | 64.48769839 | 71.13169235 | 72.79907989 | 80.77317661 | 61.1923001  | 52.22572905 |



Supplementary Table 4:  
Up and down regulated miRNAs

| Differentially Regulated miRNAs |      |                 |       | Enriched target diff. exp. genes in diff. exp. miRNA |       |                          |      |                |       |
|---------------------------------|------|-----------------|-------|------------------------------------------------------|-------|--------------------------|------|----------------|-------|
| Up Reg miRNA                    |      | Down Reg miRNA  |       | Enriched up & down miRNA                             |       | Up Reg. mRNA Enriched in |      | Down Reg. mRNA |       |
| microRNA                        | FC   | microRNA        | FC    | miRNA(up Reg.)                                       | FC    | mRNA(up)                 | FC   | mRNA(Down)     | FC    |
| hsa-miR-7-5p                    | 5.81 | hsa-miR-548h-5p | -6.81 | hsa-miR-16-5p                                        | 0.6   | TMEM87A                  | 0.60 | ZNF362         | -1.08 |
| hsa-miR-1281                    | 3.47 | hsa-miR-1277-3p | -6.8  | hsa-miR-27b-3p                                       | 0.61  | CPEB2                    | 0.62 | SEMA6D         | -2.17 |
| hsa-miR-1825                    | 3.4  | hsa-miR-548m    | -6.73 | hsa-miR-24-3p                                        | 0.63  | GFPT2                    | 0.86 | SLC4A4         | -1.10 |
| hsa-miR-143-3p                  | 3.19 | hsa-miR-498     | -6.27 | hsa-miR-30a-5p                                       | 0.73  | CEP41                    | 0.68 | ARID5B         | -0.99 |
| hsa-miR-181b-5p                 | 3.17 | hsa-miR-1289    | -5.96 | hsa-miR-192-5p                                       | 0.77  | SOCS6                    | 0.65 | ACTC1          | -1.12 |
| hsa-miR-1228-3p                 | 2.76 | hsa-miR-302f    | -5.28 | hsa-miR-17-5p                                        | 0.82  | EPHB2                    | 0.61 | CEP120         | -1.01 |
| hsa-miR-1234-3p                 | 2.65 | hsa-miR-548f-3p | -5    | hsa-miR-195-5p                                       | 0.83  | PTPRK                    | 0.59 | PAK1           | -0.77 |
| hsa-miR-605-5p                  | 2.51 | hsa-miR-663a    | -4.66 | hsa-miR-106a-5p                                      | 0.84  | DPF2                     | 0.64 | RRM2           | -0.68 |
| hsa-miR-145-5p                  | 2.35 | hsa-miR-146a-5p | -4.63 | hsa-miR-155-5p                                       | 0.85  | BCL2L1                   | 0.84 | SEMA4F         | -0.63 |
| hsa-miR-181d-5p                 | 2.33 | hsa-miR-186-3p  | -4.63 | hsa-miR-20a-5p                                       | 0.86  | DDX19B                   | 0.72 | LGR4           | -0.74 |
| hsa-miR-18a-5p                  | 2.29 | hsa-miR-149-3p  | -4.45 | hsa-miR-221-3p                                       | 0.88  | RYBP                     | 0.72 | WDR37          | -0.93 |
| hsa-miR-27b-5p                  | 2.28 | hsa-miR-1275    | -4.2  | hsa-miR-25-3p                                        | 0.91  | RAD23B                   | 0.60 | COL1A1         | -0.80 |
| hsa-miR-125a-5p                 | 2.24 | hsa-miR-1290    | -3.98 | hsa-miR-125b-5p                                      | 0.96  | BHLHE41                  | 1.48 | MAP4K4         | -0.70 |
| hsa-miR-18b-5p                  | 2.21 | hsa-miR-329-3p  | -3.92 | hsa-miR-30c-5p                                       | 0.99  | HDAC9                    | 0.93 | SCD            | -0.74 |
| hsa-miR-197-3p                  | 2.21 | hsa-miR-548n    | -3.89 | hsa-miR-361-5p                                       | 0.99  | LPHN3                    | 0.60 | TGDS           | -0.98 |
| hsa-miR-181a-2-3p               | 2.14 | hsa-miR-575     | -3.82 | hsa-miR-30e-5p                                       | 1     | CCND1                    | 0.90 | PLA2G3         | -0.75 |
| hsa-miR-132-3p                  | 2.09 | hsa-miR-483-5p  | -3.75 | hsa-miR-30b-5p                                       | 1.01  | PAPPA                    | 0.62 | UBE2I          | -0.69 |
| hsa-miR-19b-3p                  | 2.09 | hsa-miR-96-5p   | -3.74 | hsa-miR-342-3p                                       | 1.08  | RND3                     | 1.06 | GNPTAB         | -0.78 |
| hsa-miR-596                     | 2.07 | hsa-miR-513a-5p | -3.64 | hsa-miR-222-3p                                       | 1.09  | IRS2                     | 1.43 | EPHA7          | -0.99 |
| hsa-miR-1180-3p                 | 2.06 | hsa-miR-548l    | -3.5  | hsa-miR-15a-5p                                       | 1.1   | MXD1                     | 0.63 | Sep-07         | -0.81 |
| hsa-miR-1260a                   | 2.01 | hsa-miR-638     | -3.47 | hsa-miR-183-5p                                       | 1.1   | ACVR1                    | 0.79 | SCYL3          | -1.16 |
| hsa-miR-139-5p                  | 1.97 | hsa-miR-593-3p  | -3.4  | hsa-miR-182-5p                                       | 1.12  | PAFAH1B1                 | 0.66 | SNTB2          | -1.13 |
| hsa-miR-99b-5p                  | 1.97 | hsa-miR-593-5p  | -3.4  | hsa-miR-181a-5p                                      | 1.26  | FNDC3B                   | 0.71 | AGO1           | -0.69 |
| hsa-miR-324-5p                  | 1.95 | hsa-miR-519b-3p | -3.31 | hsa-miR-93-5p                                        | 1.57  | NFAT5                    | 0.81 | RDX            | -1.51 |
| hsa-miR-140-3p                  | 1.89 | hsa-miR-769-3p  | -3.27 | hsa-miR-148b-3p                                      | 1.78  | NRP1                     | 0.75 | MAPK9          | -0.61 |
| hsa-miR-125a-3p                 | 1.86 | hsa-miR-1323    | -3.09 | hsa-miR-454-3p                                       | 1.82  | GIGYF2                   | 1.35 | SMC1A          | -0.67 |
| hsa-miR-454-3p                  | 1.82 | hsa-miR-1246    | -2.9  | hsa-miR-139-5p                                       | 1.97  | SPRY4                    | 0.59 | TAF9B          | -0.66 |
| hsa-miR-766-3p                  | 1.81 | hsa-miR-1469    | -2.89 | hsa-miR-19b-3p                                       | 2.09  | SOX9                     | 1.09 | ELOVL5         | -0.60 |
| hsa-miR-940                     | 1.8  | hsa-miR-1915-3p | -2.71 | hsa-miR-18b-5p                                       | 2.21  | RGS2                     | 0.61 | USP48          | -0.60 |
| hsa-miR-148b-3p                 | 1.78 | hsa-miR-1284    | -2.68 | hsa-miR-18a-5p                                       | 2.29  | OSBPL3                   | 0.71 | DNAJC13        | -1.10 |
| hsa-miR-484                     | 1.74 | hsa-miR-936     | -2.59 | miRNA(Dwn Reg.)                                      | FC    | ZFPM2                    | 0.60 | GALNT2         | -0.91 |
| hsa-miR-212-3p                  | 1.71 | hsa-miR-23b-5p  | -2.27 | hsa-let-7e-5p                                        | -1.05 | BCL2                     | 0.86 | RPS6KA5        | -0.91 |
| hsa-miR-30e-3p                  | 1.58 | hsa-miR-517b-3p | -2.24 | hsa-let-7b-5p                                        | -0.85 | ABCA1                    | 1.43 | ICK            | -0.83 |
| hsa-miR-93-5p                   | 1.57 | hsa-miR-361-3p  | -2.15 | hsa-let-7c-5p                                        | -0.75 | ENAH                     | 0.85 | CALU           | -0.65 |
| hsa-miR-31-5p                   | 1.5  | hsa-miR-548c-5p | -2.04 | hsa-let-7d-5p                                        | -0.73 | CAMK2D                   | 0.60 | USP46          | -0.82 |
| hsa-miR-151a-5p                 | 1.49 | hsa-miR-150-3p  | -2.01 | hsa-let-7i-5p                                        | -0.59 | NPAS2                    | 0.88 | PKD2           | -0.61 |
| hsa-miR-378a-3p                 | 1.43 | hsa-miR-671-5p  | -1.82 |                                                      |       | ETV1                     | 2.08 | IKZF4          | -0.78 |
| hsa-miR-378a-5p                 | 1.43 | hsa-miR-1231    | -1.42 |                                                      |       | NTN4                     | 1.30 | GTF2H1         | -0.80 |
| hsa-let-7d-3p                   | 1.35 | hsa-miR-874-3p  | -1.31 |                                                      |       | F3                       | 1.25 | PTGFRN         | -0.83 |
| hsa-miR-181a-5p                 | 1.26 | hsa-miR-150-5p  | -1.29 |                                                      |       | EFNB2                    | 0.87 | SSX2IP         | -0.88 |
| hsa-let-7b-3p                   | 1.23 | hsa-miR-1908-5p | -1.23 |                                                      |       | THBS1                    | 1.27 | DPYSL2         | -0.73 |
| hsa-miR-30a-3p                  | 1.19 | hsa-miR-572     | -1.14 |                                                      |       | MCL1                     | 0.80 | RAB5B          | -0.60 |
| hsa-miR-28-3p                   | 1.18 | hsa-let-7e-5p   | -1.05 |                                                      |       | SLC2A3                   | 0.82 | FAM81A         | -0.96 |
| hsa-miR-455-3p                  | 1.18 | hsa-miR-574-5p  | -0.87 |                                                      |       |                          |      | RECK           | -0.85 |

|                 |      |               |       |
|-----------------|------|---------------|-------|
| hsa-miR-193b-5p | 1.13 | hsa-let-7b-5p | -0.85 |
| hsa-miR-182-5p  | 1.12 | hsa-let-7c-5p | -0.75 |
| hsa-miR-15a-5p  | 1.1  | hsa-let-7d-5p | -0.73 |
| hsa-miR-183-5p  | 1.1  | hsa-let-7i-5p | -0.59 |
| hsa-miR-188-5p  | 1.09 |               |       |
| hsa-miR-222-3p  | 1.09 |               |       |
| hsa-miR-342-3p  | 1.08 |               |       |
| hsa-miR-1913    | 1.06 |               |       |
| hsa-miR-151a-3p | 1.05 |               |       |
| hsa-miR-1238-3p | 1.03 |               |       |
| hsa-miR-877-5p  | 1.03 |               |       |
| hsa-miR-24-2-5p | 1.02 |               |       |
| hsa-miR-30b-5p  | 1.01 |               |       |
| hsa-miR-30e-5p  | 1    |               |       |
| hsa-miR-30c-5p  | 0.99 |               |       |
| hsa-miR-361-5p  | 0.99 |               |       |
| hsa-miR-1268a   | 0.98 |               |       |
| hsa-miR-125b-5p | 0.96 |               |       |
| hsa-miR-320d    | 0.94 |               |       |
| hsa-miR-25-3p   | 0.91 |               |       |
| hsa-miR-221-3p  | 0.88 |               |       |
| hsa-miR-20a-5p  | 0.86 |               |       |
| hsa-miR-452-5p  | 0.86 |               |       |
| hsa-miR-155-5p  | 0.85 |               |       |
| hsa-miR-106a-5p | 0.84 |               |       |
| hsa-miR-195-5p  | 0.83 |               |       |
| hsa-miR-17-5p   | 0.82 |               |       |
| hsa-miR-192-5p  | 0.77 |               |       |
| hsa-miR-30a-5p  | 0.73 |               |       |
| hsa-miR-99a-5p  | 0.7  |               |       |
| hsa-miR-24-3p   | 0.63 |               |       |
| hsa-miR-27b-3p  | 0.61 |               |       |
| hsa-miR-16-5p   | 0.6  |               |       |

|        |       |
|--------|-------|
| MINK1  | -0.80 |
| ITGA6  | -0.82 |
| EXOC5  | -0.60 |
| KAT2B  | -0.94 |
| TMEM47 | -0.70 |
| INSIG1 | -2.18 |
| DICER1 | -0.70 |
| DCP2   | -1.24 |

**Supplementary table 5 :**

The pathways and GO biological processes(GOBP) data were compiled from the various resources as mentioned below. All these pathways and GOBP were combined and made a database in house at BioCOS Life Sciences to be used for the enrichment analysis.

Data sources used in creating Pathway/GOBP DB ( Block "pathways/GOBP DB" - genes database for enrichment as shown in figure-1 A)

| Data Source        | Link                                                                                                                                                                                                                                                                                                                                                               | Reference Paper                                                                                                                                                                                                   |
|--------------------|--------------------------------------------------------------------------------------------------------------------------------------------------------------------------------------------------------------------------------------------------------------------------------------------------------------------------------------------------------------------|-------------------------------------------------------------------------------------------------------------------------------------------------------------------------------------------------------------------|
| Kegg Pathways      | <a href="http://www.genome.jp/kegg-bin/get_htext?query=hsa00010&amp;htext=hsa00010.keg">http://www.genome.jp/kegg-bin/get_htext?query=hsa00010&amp;htext=hsa00010.keg</a>                                                                                                                                                                                          |                                                                                                                                                                                                                   |
| Reactome Pathway   | <a href="http://www.reactome.org/pages/download-data/">http://www.reactome.org/pages/download-data/</a>                                                                                                                                                                                                                                                            | <a href="https://www.ncbi.nlm.nih.gov/pubmed/27589964">https://www.ncbi.nlm.nih.gov/pubmed/27589964</a>                                                                                                           |
| Wiki Pathways      | <a href="http://www.wikipathways.org/index.php/Download_Pathways">www.wikipathways.org/index.php/Download_Pathways</a>                                                                                                                                                                                                                                             | <a href="https://academic.oup.com/nar/article-lookup/doi/10.1093/nar/gkv1024">https://academic.oup.com/nar/article-lookup/doi/10.1093/nar/gkv1024</a>                                                             |
| NCI Nature Pathway | <a href="http://www.pathwaycommons.org/pc2/data/PathwayCommons.8.pid.GSEA.hgnc.gmt.gz">PathwayCommons.8.pid.GSEA.hgnc.gmt.gz</a> (data)                                                                                                                                                                                                                            | <a href="https://academic.oup.com/nar/article/37/suppl_1/D674/1002223/PID-the-Pathway-Interaction-Database">https://academic.oup.com/nar/article/37/suppl_1/D674/1002223/PID-the-Pathway-Interaction-Database</a> |
| Panther Pathways   | <a href="ftp://ftp.pantherdb.org/pathway/current_releases/SequenceAssociationPathway3.4.1.txt">ftp://ftp.pantherdb.org/pathway/current_releases/SequenceAssociationPathway3.4.1.txt</a>                                                                                                                                                                            | <a href="https://www.ncbi.nlm.nih.gov/pubmed/26578592">https://www.ncbi.nlm.nih.gov/pubmed/26578592</a>                                                                                                           |
| Humancyc           | <a href="https://humancyc.org/">https://humancyc.org/</a> (site)<br><a href="http://www.pathwaycommons.org/archives/PC2/current/">http://www.pathwaycommons.org/archives/PC2/current/</a> (data: pathway commons) File: <a href="http://www.pathwaycommons.org/pc2/data/PathwayCommons.8.humancyc.GSEA.hgnc.gmt.gz">PathwayCommons.8.humancyc.GSEA.hgnc.gmt.gz</a> | <a href="http://genomebiology.biomedcentral.com/articles/10.1186/gb-2004-6-1-r2">http://genomebiology.biomedcentral.com/articles/10.1186/gb-2004-6-1-r2</a>                                                       |
| Biological Process | <a href="http://www.geneontology.org/page/download-annotations">http://www.geneontology.org/page/download-annotations</a><br><a href="http://www.geneontology.org/page/download-annotations">goa_human.gaf.gz</a> (file)                                                                                                                                           | -                                                                                                                                                                                                                 |

**Supplementary table 6 :**

The miRNA targets data were compiled from the various resources as mentioned below including the experimentally validated targets such as from Tarbase. All these miRNAs and corresponding target genes were combined and made a database in house at BioCOS Life Sciences to be used for the enrichment analysis. To reduce the false positives, only those target genes of a miRNA were taken - (1) Which are experimentally validated (2) which are at least reported in 5 databases/predictions and that is called as target genes with hit score 5.

Data sources used in creating miRNA target genes DB ( Block "miRNAs Target Genes DB" - target genes database for enrichment as shown in figure-1 C2)

| MiRNA TargetGenes Source            | Link                                                                                                                                      | Publication                                                                                                                                                                                                                        |
|-------------------------------------|-------------------------------------------------------------------------------------------------------------------------------------------|------------------------------------------------------------------------------------------------------------------------------------------------------------------------------------------------------------------------------------|
| miRTarbase                          | <a href="http://mirtarbase.mbc.nctu.edu.tw/">http://mirtarbase.mbc.nctu.edu.tw/</a>                                                       | <a href="https://academic.oup.com/nar/article-lookup/doi/10.1093/nar/gkn809">https://academic.oup.com/nar/article-lookup/doi/10.1093/nar/gkn809</a>                                                                                |
| miRecords                           | <a href="http://c1.accurascience.com/miRecords/">http://c1.accurascience.com/miRecords/</a>                                               | <a href="https://academic.oup.com/nar/article-lookup/doi/10.1093/nar/gkn851">https://academic.oup.com/nar/article-lookup/doi/10.1093/nar/gkn851</a>                                                                                |
| <b>Prediction Algorithm sources</b> |                                                                                                                                           |                                                                                                                                                                                                                                    |
| DIANA                               | <a href="http://diana.imis.athena-innovation.gr/DianaTools/index.php">http://diana.imis.athena-innovation.gr/DianaTools/index.php</a>     | <a href="https://www.ncbi.nlm.nih.gov/pmc/articles/PMC2703977/">https://www.ncbi.nlm.nih.gov/pmc/articles/PMC2703977/</a>                                                                                                          |
| miRanda                             | <a href="http://www.microrna.org/microrna/home.do">http://www.microrna.org/microrna/home.do</a>                                           | <a href="http://link.springer.com/protocol/10.1385%2F1-59745-123-1%3A101">http://link.springer.com/protocol/10.1385%2F1-59745-123-1%3A101</a>                                                                                      |
| targetscan                          | <a href="http://www.targetscan.org/vert_71/">http://www.targetscan.org/vert_71/</a>                                                       | <a href="https://elifesciences.org/content/4/e05005">https://elifesciences.org/content/4/e05005</a><br><a href="http://www.cell.com/cell/pdf/S0092-8674(04)01260-7.pdf">http://www.cell.com/cell/pdf/S0092-8674(04)01260-7.pdf</a> |
| picTar                              | <a href="http://www.pictar.org/">http://www.pictar.org/</a>                                                                               | <a href="http://www.nature.com/ng/journal/v37/n5/full/ng1536.html">http://www.nature.com/ng/journal/v37/n5/full/ng1536.html</a>                                                                                                    |
| PITA                                | <a href="https://genie.weizmann.ac.il/pubs/mir07/mir07_prediction.html">https://genie.weizmann.ac.il/pubs/mir07/mir07_prediction.html</a> | <a href="http://www.nature.com/ng/journal/v39/n10/full/ng2135.html">http://www.nature.com/ng/journal/v39/n10/full/ng2135.html</a>                                                                                                  |
| rna22                               | <a href="https://cm.jefferson.edu/rna22/Interactive/">https://cm.jefferson.edu/rna22/Interactive/</a>                                     | <a href="http://www.cell.com/cell/pdf/S0092-8674(06)01099-3.pdf">http://www.cell.com/cell/pdf/S0092-8674(06)01099-3.pdf</a>                                                                                                        |
| miRBridge                           |                                                                                                                                           | <a href="https://www.ncbi.nlm.nih.gov/pmc/articles/PMC3110938/">https://www.ncbi.nlm.nih.gov/pmc/articles/PMC3110938/</a>                                                                                                          |

Supplementary Table 7.1:

Literature evidence of the target genes for the miRNA for Supplementary Figure S2 A and S2 B

| Literature evidence of the target genes for the miRNA for Supplementary figure S2 A and S2 B |          |               |                                                                                                                                                                                                                                                      |                                                                                                                                               |
|----------------------------------------------------------------------------------------------|----------|---------------|------------------------------------------------------------------------------------------------------------------------------------------------------------------------------------------------------------------------------------------------------|-----------------------------------------------------------------------------------------------------------------------------------------------|
| Literature evidence of the target genes for the miRNA for Supplementary figure S2 A          |          |               |                                                                                                                                                                                                                                                      |                                                                                                                                               |
| MiRNA                                                                                        | MRNA     | Pubmed id     | Reference                                                                                                                                                                                                                                            | Link                                                                                                                                          |
| Let-7                                                                                        | RRM2     | PMID:23335963 | PLoS One. 2013;8(1):e53436. Epub 2013 Jan 15. Differential processing of let-7a precursors influences RRM2 expression and chemosensitivity in pancreatic cancer: role of LIN-28 and SET oncoprotein. Bhutia YD1, Hung SW                             | <a href="https://www.ncbi.nlm.nih.gov/pubmed/23335963">https://www.ncbi.nlm.nih.gov/pubmed/23335963</a>                                       |
|                                                                                              | MAP4K4   | PMID:27531260 | 2016 Jul;38(7):485-91. [Let-7 miRNA silencing promotes Kaposi's sarcoma-associated herpesvirus lytic replication via activating mitogen-activated protein kinase kinase kinase 4 and its downstream factors]. [Article in Chinese] Zou C, Xu T, Xu Y | <a href="https://www.ncbi.nlm.nih.gov/pubmed/27531260">https://www.ncbi.nlm.nih.gov/pubmed/27531260</a>                                       |
|                                                                                              | PAK1,RDX | PMID:23339187 | Mol Cancer Res. Epub 2013 Jan 21. The heterochronic microRNA let-7 inhibits cell motility by regulating the genes in the actin cytoskeleton pathway in breast cancer. Hu X, Guo J, Zheng L, Li C                                                     | <a href="https://www.ncbi.nlm.nih.gov/pubmed/23339187">https://www.ncbi.nlm.nih.gov/pubmed/23339187</a>                                       |
| MiR-106a                                                                                     | MAPK9    | PMID:23029228 | PLoS One Published online 2012 Sep 24. The miR-17 Family Links p63 Protein to MAPK Signaling to Promote the Onset of Human Keratinocyte Differentiation Ning Wu, Eric Sulpice                                                                        | <a href="https://www.ncbi.nlm.nih.gov/pmc/articles/PMC3454365/">https://www.ncbi.nlm.nih.gov/pmc/articles/PMC3454365/</a>                     |
| MiR-125                                                                                      | DICER1   | PMID:24513630 | Oncogenesis. 2014 Feb 10 Serum levels of mature microRNAs in DICER1-mutated pleuropulmonary blastoma. Murray MJ, Bailey S                                                                                                                            | <a href="http://www.nature.com/oncis/journal/v3/n2/full/oncis20141a.html">http://www.nature.com/oncis/journal/v3/n2/full/oncis20141a.html</a> |

Sheet1

|         |              |                                                 |                                                                                                                                                                                                                                              |                                                                                                                                                                                                                                                                                                                                         |
|---------|--------------|-------------------------------------------------|----------------------------------------------------------------------------------------------------------------------------------------------------------------------------------------------------------------------------------------------|-----------------------------------------------------------------------------------------------------------------------------------------------------------------------------------------------------------------------------------------------------------------------------------------------------------------------------------------|
|         | <i>JKZF4</i> | PMID:22723551                                   | Blood. 2012 Jun 21.<br>The down-regulation of miR-125b in chronic lymphocytic leukemias leads to metabolic adaptation of cells to a transformed state.<br>Tili E, Michaille JJ, Luo Z                                                        | <a href="http://www.bloodjournal.org/content/120/13/2631.long?sso-checked=true">http://www.bloodjournal.org/content/120/13/2631.long?sso-checked=true</a>                                                                                                                                                                               |
| MiR-15a | RECK         | PMID:23176145                                   | FEBS J. Epub 2013 Jan 16.<br>MicroRNA-15a promotes neuroblastoma migration by targeting reversion-inducing cysteine-rich protein with Kazal motifs (RECK) and regulating matrix metalloproteinase-9 expression.<br>Xin C, Buhe B, Hongting L | <a href="https://www.ncbi.nlm.nih.gov/pubmed/23176145">https://www.ncbi.nlm.nih.gov/pubmed/23176145</a>                                                                                                                                                                                                                                 |
| MiR-16  | RECK         | PMID:24852767                                   | Cell Physiol Biochem. Epub 2014 May 5.<br>MiR-16 induced the suppression of cell apoptosis while promote proliferation in esophageal squamous cell carcinoma.<br>Zhu Y, Xia Y, Niu H                                                         | <a href="https://www.karger.com/Article/FullText/358701">https://www.karger.com/Article/FullText/358701</a>                                                                                                                                                                                                                             |
|         | CALU         | PMID:19549910                                   | Cancer Res. Epub 2009 Jun 23.<br>miR-15a and miR-16 are implicated in cell cycle regulation in a Rb-dependent manner and are frequently deleted or down-regulated in non-small cell lung cancer.<br>Bandi N, Zbinden S                       | <a href="http://cancerres.aacrjournals.org/content/69/13/5553">http://cancerres.aacrjournals.org/content/69/13/5553</a>                                                                                                                                                                                                                 |
|         | SLC4A4       | PMID:25701361                                   | Pathol Res Pract. Epub 2015 Jan 14.<br>Global correlation analysis for microRNA and gene expression profiles in human obesity.<br>Li J, Zhou C                                                                                               | <a href="https://www.ncbi.nlm.nih.gov/pubmed/25701361">https://www.ncbi.nlm.nih.gov/pubmed/25701361</a>                                                                                                                                                                                                                                 |
| MiR-17  | PKD2         | PMID:19821056<br>PMID:23759744<br>PMID:20215348 | Mol Biol Rep. Epub 2009 Oct 10.<br>MicroRNA-17 post-transcriptionally regulates polycystic kidney disease-2 gene and promotes cell proliferation.<br>Sun H, Li QW, Lv XY<br><br>Proc Natl Acad Sci U S A. Epub 2012 Jun 12.                  | <a href="https://www.ncbi.nlm.nih.gov/pubmed/19821056">https://www.ncbi.nlm.nih.gov/pubmed/19821056</a><br><br><a href="http://www.pnas.org/content/110/26/10765.full">http://www.pnas.org/content/110/26/10765.full</a><br><br><a href="https://www.ncbi.nlm.nih.gov/pubmed/20215348">https://www.ncbi.nlm.nih.gov/pubmed/20215348</a> |



Sheet1

|          |       |               |                                                                                                                                                                                              |                                                                                                                             |
|----------|-------|---------------|----------------------------------------------------------------------------------------------------------------------------------------------------------------------------------------------|-----------------------------------------------------------------------------------------------------------------------------|
|          | IKZF4 | PMID:24644282 | J Biol Chem. Epub 2014 Mar 18. miR-17-92 cluster targets phosphatase and tensin homology and Ikaros Family Zinc Finger 4 to promote TH17-mediated inflammation. Liu SQ, Jiang S              | <a href="https://www.ncbi.nlm.nih.gov/pubmed/24644282">https://www.ncbi.nlm.nih.gov/pubmed/24644282</a>                     |
|          | KAT2B | PMID:23095762 | BMC Cancer. 2012 Oct 24; miR-17-5p targets the p300/CBP-associated factor and modulates androgen receptor transcriptional activity in cultured prostate cancer cells. Gong AY, Eischeid AN   | <a href="https://www.ncbi.nlm.nih.gov/pmc/articles/PMC3519561/">https://www.ncbi.nlm.nih.gov/pmc/articles/PMC3519561/</a>   |
|          | MAPK9 | PMID:23029228 | PLoS One. Epub 2012 Sep 24. The miR-17 family links p63 protein to MAPK signaling to promote the onset of human keratinocyte differentiation. Wu N, Sulpice E, Obeid P                       | <a href="https://www.ncbi.nlm.nih.gov/pmc/articles/PMC3454365/">https://www.ncbi.nlm.nih.gov/pmc/articles/PMC3454365/</a>   |
| MiR-181a | RECK  | PMID:25230784 | Acta Biochim Biophys Sin (Shanghai). Epub 2014 Sep 17. Clinical significance of up-regulated miR-181a in prognosis and progression of esophageal cancer. Xiang Z, Dong X, Sun Q              | <a href="http://abbs.oxfordjournals.org/content/46/11/1007.full">http://abbs.oxfordjournals.org/content/46/11/1007.full</a> |
| MiR-182  | RECK  | PMID:26609496 | Am J Cancer Res. 2015 Aug 15; MicroRNA miR-182 cluster mediated modulation of RECK without changes in cell surface membrane type-1 matrix metalloproteinase (MT1-MMP). Silva M, Hernandez ME | <a href="https://www.ncbi.nlm.nih.gov/pmc/articles/PMC4633917/">https://www.ncbi.nlm.nih.gov/pmc/articles/PMC4633917/</a>   |
|          | AGO1  | PMID:21195000 | Mol Cell. Epub 2010 Dec 30. miR-182-mediated downregulation of BRCA1 impacts DNA repair and sensitivity to PARP inhibitors. Moskwa P, Buffa FM                                               | <a href="https://www.ncbi.nlm.nih.gov/pmc/articles/PMC3249932/">https://www.ncbi.nlm.nih.gov/pmc/articles/PMC3249932/</a>   |
|          | RDX   | PMID:20186779 | Am J Med Genet A. 2010 Mar; miRNA mutations are not a common cause of deafness. Hildebrand MS, Witmer PD                                                                                     | <a href="https://www.ncbi.nlm.nih.gov/pmc/articles/PMC2830307/">https://www.ncbi.nlm.nih.gov/pmc/articles/PMC2830307/</a>   |

Sheet1

|         |        |                                |                                                                                                                                                                                                                                                                                                   |                                                                                                                                                                                                                                                                |
|---------|--------|--------------------------------|---------------------------------------------------------------------------------------------------------------------------------------------------------------------------------------------------------------------------------------------------------------------------------------------------|----------------------------------------------------------------------------------------------------------------------------------------------------------------------------------------------------------------------------------------------------------------|
| MiR-192 | DICER1 | PMID:24223844                  | PLoS One. 2013 Nov 1;<br>MiR-192 directly binds and regulates Dicer1 expression in neuroblastoma.<br>Feinberg-Gorenshtein G, Guedj A                                                                                                                                                              | <a href="http://journals.plos.org/plosone/article?id=10.1371/journal.pone.0078713">http://journals.plos.org/plosone/article?id=10.1371/journal.pone.0078713</a>                                                                                                |
| MiR-20a | MAPK9  | PMID:23029228                  | PLoS One. Epub 2012 Sep 24.<br>The miR-17 family links p63 protein to MAPK signaling to promote the onset of human keratinocyte differentiation.<br>Wu N, Sulpice E, Obeid P                                                                                                                      | <a href="https://www.ncbi.nlm.nih.gov/pmc/articles/PMC3454365/">https://www.ncbi.nlm.nih.gov/pmc/articles/PMC3454365/</a>                                                                                                                                      |
| MiR-221 | PAK1   | PMID:25447917<br>PMID:23333386 | Gene. Epub 2014 Nov 18.<br>The investigation of miR-221-3p and PAK1 gene expressions in breast cancer cell lines.<br>Ergun S, Tayeb TS<br><br>Biochem Biophys Res Commun. Epub 2013 Jan 16.<br>Increased expression of microRNA-221 inhibits PAK1 in endothelial progenitor cells and impairs its | <a href="http://www.sciencedirect.com/science/article/pii/S0378111914012980">http://www.sciencedirect.com/science/article/pii/S0378111914012980</a><br><a href="https://www.ncbi.nlm.nih.gov/pubmed/23333386">https://www.ncbi.nlm.nih.gov/pubmed/23333386</a> |
| MiR-222 | PAK1   | PMID:19962668                  | Cancer Cell. 2009.10.014.<br>miR-221&222 regulate TRAIL resistance and enhance tumorigenicity through PTEN and TIMP3 downregulation.<br>Garofalo M, Di Leva G                                                                                                                                     | <a href="http://www.sciencedirect.com/science/article/pii/S1535610809003833">http://www.sciencedirect.com/science/article/pii/S1535610809003833</a>                                                                                                            |
| MiR-24  | INSIG1 | PMID:24677249                  | Hepatology. Epub 2014 May 19.<br>Inhibition of microRNA-24 expression in liver prevents hepatic lipid accumulation and hyperlipidemia.<br>Ng R, Wu H                                                                                                                                              | <a href="https://www.ncbi.nlm.nih.gov/pubmed/24677249">https://www.ncbi.nlm.nih.gov/pubmed/24677249</a>                                                                                                                                                        |
| MiR-25  | KAT2B  | PMID:27507706                  | Sci Rep. 2016 Aug 10;<br>miRNA profiles in livers with different mass deficits after partial hepatectomy and miR-106b~25 cluster accelerating hepatocyte proliferation in rats.<br>Xu X, Liu Z, Wang J                                                                                            | <a href="https://www.ncbi.nlm.nih.gov/pmc/articles/PMC4978973/">https://www.ncbi.nlm.nih.gov/pmc/articles/PMC4978973/</a>                                                                                                                                      |

Sheet1

|                                                                                           |             |                  |                                                                                                                                                                                                                               |                                                                                                                                                                                                                                                                                                                                                                            |
|-------------------------------------------------------------------------------------------|-------------|------------------|-------------------------------------------------------------------------------------------------------------------------------------------------------------------------------------------------------------------------------|----------------------------------------------------------------------------------------------------------------------------------------------------------------------------------------------------------------------------------------------------------------------------------------------------------------------------------------------------------------------------|
|                                                                                           | INSIG1      | PMID:24643999    | Int J Cancer. Epub 2014 Apr 2. Genetic association of gastric cancer with miRNA clusters including the cancer-related genes MIR29, MIR25, MIR93 and MIR106: results from the EPIC-EURGAST study. Espinosa-Parrilla Y, Muñoz X | <a href="http://onlinelibrary.wiley.com/doi/10.1002/ijc.28850/full">http://onlinelibrary.wiley.com/doi/10.1002/ijc.28850/full</a>                                                                                                                                                                                                                                          |
| MiR-27                                                                                    | SEMA6D      | PMID:21536891    | Proc Natl Acad Sci U S A. Epub 2011 May 2. Regulation of angiogenesis and choroidal neovascularization by members of microRNA-23~27~24 clusters. Zhou Q, Gallagher R                                                          | <a href="https://www.ncbi.nlm.nih.gov/pmc/articles/PMC3100947/">https://www.ncbi.nlm.nih.gov/pmc/articles/PMC3100947/</a><br><a href="http://circ.ahajournals.org/content/132/Suppl_3/A15187?cited-by=yes&amp;legid=circulationaha;132/Suppl_3/A15187">http://circ.ahajournals.org/content/132/Suppl_3/A15187?cited-by=yes&amp;legid=circulationaha;132/Suppl_3/A15187</a> |
|                                                                                           | USP46       | PMID:25369332    | PLoS One. 2014 Nov 4; miR-27 negatively regulates pluripotency-associated genes in human embryonal carcinoma cells. Fuchs H, Theuser M                                                                                        | <a href="http://journals.plos.org/plosone/article?id=10.1371/journal.pone.0111637">http://journals.plos.org/plosone/article?id=10.1371/journal.pone.0111637</a>                                                                                                                                                                                                            |
| MiR-30a                                                                                   | SEPT7       | PMID:23383034    | PLoS One. Epub 2013 Jan 28. MiR-30a-5p antisense oligonucleotide suppresses glioma cell growth by targeting SEPT7. Jia Z, Wang K                                                                                              | <a href="https://www.ncbi.nlm.nih.gov/pmc/articles/PMC3557229/">https://www.ncbi.nlm.nih.gov/pmc/articles/PMC3557229/</a>                                                                                                                                                                                                                                                  |
| MiR-92 family                                                                             | PKD2        | PMID:23759744    | Proc Natl Acad Sci U S A. Epub 2013 Jun 12. miR-17~92 miRNA cluster promotes kidney cyst growth in polycystic kidney disease. Patel V, Williams D                                                                             | <a href="http://www.pnas.org/content/110/26/10765.full">http://www.pnas.org/content/110/26/10765.full</a>                                                                                                                                                                                                                                                                  |
|                                                                                           | IKZF4       | PMID:24644282    | J Biol Chem. Epub 2014 Mar 18. miR-17-92 cluster targets phosphatase and tensin homology and Ikaros Family Zinc Finger 4 to promote TH17-mediated inflammation. Liu SQ, Jiang S, Li C, Zhang B                                | <a href="https://www.ncbi.nlm.nih.gov/pubmed/24644282">https://www.ncbi.nlm.nih.gov/pubmed/24644282</a>                                                                                                                                                                                                                                                                    |
| <b>Literature evidence of the target genes for the miRNA in supplementary figure S2 B</b> |             |                  |                                                                                                                                                                                                                               |                                                                                                                                                                                                                                                                                                                                                                            |
| <b>MiRNA</b>                                                                              | <b>MRNA</b> | <b>Pubmed id</b> | <b>Refernce</b>                                                                                                                                                                                                               | <b>Link</b>                                                                                                                                                                                                                                                                                                                                                                |

Sheet 1

|                |          |                                   |                                                                                                                                                                                                 |                                                                                                                                                     |
|----------------|----------|-----------------------------------|-------------------------------------------------------------------------------------------------------------------------------------------------------------------------------------------------|-----------------------------------------------------------------------------------------------------------------------------------------------------|
| MiR-106 family | NFAT5    | PMID:24287119<br>PMCID:PMC4357785 | Original Research<br>An Integrative Meta-analysis of MicroRNAs in Hepatocellular Carcinoma<br>Mahmoud ElHefnawi, et al                                                                          | <a href="http://www.sciencedirect.com/science/article/pii/S1672022913001174">http://www.sciencedirect.com/science/article/pii/S1672022913001174</a> |
|                | F3       | PMCID: PMC3355544                 | Published online 2012 May 3<br>miR-93/106b and Their Host Gene, MCM7, Are Differentially Expressed in Leiomyomas and Functionally Target F3 and IL-8<br>Tsai-Der Chuang, et al                  | <a href="https://www.ncbi.nlm.nih.gov/pmc/articles/PMC3355544/">https://www.ncbi.nlm.nih.gov/pmc/articles/PMC3355544/</a>                           |
|                | ABCA1    | PMID:22119192<br>PMCID:PMC3328628 | Published online 2011 Nov;<br>miR-106b impairs cholesterol efflux and increases A $\beta$ levels by repressing ABCA1 expression<br>Jaekwang Kim, et al                                          | <a href="https://www.ncbi.nlm.nih.gov/pmc/articles/PMC3328628/">https://www.ncbi.nlm.nih.gov/pmc/articles/PMC3328628/</a>                           |
| MiR-125a       | RYBP     | PMID:26759236                     | Microenvironment and Immunology<br>Forced Activation of Notch in Macrophages Represses Tumor Growth by Upregulating miR-125a and Disabling Tumor-Associated Macrophages<br>Jun-Long Zhao, et al | <a href="http://cancerres.aacrjournals.org/content/76/6/1403.long">http://cancerres.aacrjournals.org/content/76/6/1403.long</a>                     |
| MiR-125b       | MCL1     | PMCID: PMC4609369                 | Biomed Res Int. 2015;<br>miR-125b Suppresses Proliferation and Invasion by Targeting MCL1 in Gastric Cancer<br>Shihua Wu, et al                                                                 | <a href="https://www.ncbi.nlm.nih.gov/pmc/articles/PMC4609369/">https://www.ncbi.nlm.nih.gov/pmc/articles/PMC4609369/</a>                           |
|                | PAFAH1B1 | PMID:26035737                     | J Neural Eng. 2015 Aug<br>microRNA regulatory mechanism by which PLLA aligned nanofibers influence PC12 cell differentiation.<br>Yu Y, et al                                                    | <a href="https://www.ncbi.nlm.nih.gov/pubmed/26035737">https://www.ncbi.nlm.nih.gov/pubmed/26035737</a>                                             |
|                | PAFAH1B1 | PMID:26035737                     | J Neural Eng. 2015 Aug<br>microRNA regulatory mechanism by which PLLA aligned nanofibers influence PC12 cell differentiation.<br>Yu Y, et al                                                    | <a href="https://www.ncbi.nlm.nih.gov/pubmed/26035737">https://www.ncbi.nlm.nih.gov/pubmed/26035737</a>                                             |

Sheet 1

|          |        |                                       |                                                                                                                                                              |                                                                                                                                                 |
|----------|--------|---------------------------------------|--------------------------------------------------------------------------------------------------------------------------------------------------------------|-------------------------------------------------------------------------------------------------------------------------------------------------|
| MiR-148a | ACVR1  | PMID:2527100<br>1                     | Regulatory MiR-148a-ACVR1/BMP circuit defines a cancer stem cell-like aggressive subtype of hepatocellular carcinoma<br>Lian Li, et al                       | <a href="http://onlinelibrary.wiley.com/doi/10.1002/hep.27543/full">http://onlinelibrary.wiley.com/doi/10.1002/hep.27543/full</a>               |
|          | ABCA1  | PMID:2643736<br>5                     | Nature Medicine<br>MicroRNA-148a regulates LDL receptor and ABCA1 expression to control circulating lipoprotein levels<br>Leigh Goedeke, et al               | <a href="http://www.nature.com/nm/journal/v21/n11/abs/nm.3949.html">http://www.nature.com/nm/journal/v21/n11/abs/nm.3949.html</a>               |
| MiR-15   | RAD23B | PMID:2408457<br>4                     | Identification of potential microRNA–target pairs associated with osteopetrosis by deep sequencing, iTRAQ proteomics and bioinformatics<br>Minglin Ou, et al | <a href="http://www.nature.com/ejhg/journal/v22/n5/full/ejhg2013221a.html">http://www.nature.com/ejhg/journal/v22/n5/full/ejhg2013221a.html</a> |
|          | CPEB   | PMID:26829217<br>PMCID:<br>PMC4734764 | Published online 2016 Feb 1<br>CPEB and miR-15/16 Co-Regulate Translation of Cyclin E1 mRNA during Xenopus Oocyte Maturation<br>Ania Wilczynska, et al       | <a href="https://www.ncbi.nlm.nih.gov/pmc/articles/PMC4734764/">https://www.ncbi.nlm.nih.gov/pmc/articles/PMC4734764/</a>                       |
|          | BCL2   | PMID:1616626<br>2                     | Proc Natl Acad Sci U S A. 2005 Sep 27<br>miR-15 and miR-16 induce apoptosis by targeting BCL2.<br>Cimmino A, et al                                           | <a href="https://www.ncbi.nlm.nih.gov/pubmed/16166262">https://www.ncbi.nlm.nih.gov/pubmed/16166262</a>                                         |
| MiR-16   | CCND1  | PMID:2292282<br>7                     | 2012 Aug 24<br>miR-15a and miR-16-1 Downregulate CCND1 and Induce Apoptosis and Cell Cycle Arrest in Osteosarcoma<br>CK Cai et al                            | <a href="https://www.ncbi.nlm.nih.gov/labs/articles/22922827/">https://www.ncbi.nlm.nih.gov/labs/articles/22922827/</a>                         |
|          | CPEB   | PMID:26829217<br>PMCID:<br>PMC4734764 | Published online 2016 Feb 1<br>CPEB and miR-15/16 Co-Regulate Translation of Cyclin E1 mRNA during Xenopus Oocyte Maturation<br>Ania Wilczynska, et al       | <a href="https://www.ncbi.nlm.nih.gov/pmc/articles/PMC4734764/">https://www.ncbi.nlm.nih.gov/pmc/articles/PMC4734764/</a>                       |

Sheet1

|        |        |                                |                                                                                                                                                                                                                     |                                                                                                                                                                                                                                      |
|--------|--------|--------------------------------|---------------------------------------------------------------------------------------------------------------------------------------------------------------------------------------------------------------------|--------------------------------------------------------------------------------------------------------------------------------------------------------------------------------------------------------------------------------------|
|        | BCL2   | PMID:16166262                  | Proc Natl Acad Sci U S A. 2005 Sep 27<br>miR-15 and miR-16 induce apoptosis by targeting BCL2.<br>Cimmino A, et al                                                                                                  | <a href="https://www.ncbi.nlm.nih.gov/pubmed/16166262">https://www.ncbi.nlm.nih.gov/pubmed/16166262</a>                                                                                                                              |
|        | CCND1  | PMID:22922827                  | 2012 Aug 24<br>miR-15a and miR-16-1 Downregulate CCND1 and Induce Apoptosis and Cell Cycle Arrest in Osteosarcoma<br>CK Cai et al                                                                                   | <a href="https://www.ncbi.nlm.nih.gov/labs/articles/22922827/">https://www.ncbi.nlm.nih.gov/labs/articles/22922827/</a>                                                                                                              |
|        | RAD23B | PMID:24084574                  | Identification of potential microRNA–target pairs associated with osteopetrosis by deep sequencing, iTRAQ proteomics and bioinformatics<br>Minglin Ou, et al                                                        | <a href="http://www.nature.com/ejhg/journal/v22/n5/full/ejhg2013221a.html">http://www.nature.com/ejhg/journal/v22/n5/full/ejhg2013221a.html</a>                                                                                      |
| MiR-17 | SOCS6  | PMID:24801601                  | miR-17-5p promotes proliferation by targeting SOCS6 in gastric cancer cells<br>Qiong Wu, et al                                                                                                                      | <a href="http://www.sciencedirect.com/science/article/pii/S0014579314003226">http://www.sciencedirect.com/science/article/pii/S0014579314003226</a>                                                                                  |
|        | ETV1   | PMID:26158900<br>PMID:23969726 | Oncotarget. 2015 Aug 7<br>miR-17 regulates melanoma cell motility by inhibiting the translation of ETV1.<br>Cohen R, et al<br>Br J Cancer. 2013 Sep 17;<br>MiR-17-92 and miR-221/222 cluster members target KIT and | <a href="https://www.ncbi.nlm.nih.gov/pubmed/26158900">https://www.ncbi.nlm.nih.gov/pubmed/26158900</a><br><a href="https://www.ncbi.nlm.nih.gov/pmc/articles/PMC3776993/">https://www.ncbi.nlm.nih.gov/pmc/articles/PMC3776993/</a> |
|        | NPAS2  | PMID:27440219                  | Sci Rep. 2016 Jul 21;<br>A novel role of microRNA 17-5p in the modulation of circadian rhythm.<br>Gao Q, et al                                                                                                      | <a href="https://www.ncbi.nlm.nih.gov/pubmed/27440219">https://www.ncbi.nlm.nih.gov/pubmed/27440219</a>                                                                                                                              |
|        | RND3   | PMID:22132820                  | Biochem J. 2012 Mar 1;<br>Up-regulated miR-17 promotes cell proliferation, tumour growth and cell cycle progression by targeting the RND3 tumour suppressor gene in colorectal carcinoma.<br>Luo H, et al           | <a href="https://www.ncbi.nlm.nih.gov/pubmed/22132820">https://www.ncbi.nlm.nih.gov/pubmed/22132820</a>                                                                                                                              |

Sheet 1

|         |                                |                                                                                                                                                                                                      |                                                                                                                                                                                                                                      |
|---------|--------------------------------|------------------------------------------------------------------------------------------------------------------------------------------------------------------------------------------------------|--------------------------------------------------------------------------------------------------------------------------------------------------------------------------------------------------------------------------------------|
| MCL1    | PMID:26513648                  | Cell Microbiol. 2016 May<br>MicroRNA 17-5p regulates autophagy in Mycobacterium tuberculosis-infected macrophages by targeting Mcl-1 and STAT3.<br>Kumar R, et al                                    | <a href="https://www.ncbi.nlm.nih.gov/pubmed/26513648">https://www.ncbi.nlm.nih.gov/pubmed/26513648</a>                                                                                                                              |
| EFNB2   | PMID:22438230                  | J Clin Endocrinol Metab. 2012 Jun;<br>Preeclampsia Up-Regulates Angiogenesis-Associated MicroRNA (i.e., miR-17, -20a, and -20b) That Target Ephrin-B2 and EPHB4 in Human Placenta<br>Wen Wang, et al | <a href="https://www.ncbi.nlm.nih.gov/pmc/articles/PMC3387422/">https://www.ncbi.nlm.nih.gov/pmc/articles/PMC3387422/</a>                                                                                                            |
| ABCA1   | PMID:25785043                  | Int J Clin Exp Med. 2015 Jan;<br>Up-regulated miR-93 contributes to coronary atherosclerosis pathogenesis through targeting ABCA1.<br>He Y, et al                                                    | <a href="https://www.ncbi.nlm.nih.gov/pubmed/25785043">https://www.ncbi.nlm.nih.gov/pubmed/25785043</a>                                                                                                                              |
| THBS1   | PMID:22383169                  | Genes Chromosomes Cancer. 2012 Jun;<br>The miR-17-92 Cluster and Its Target THBS1 Are Differentially Expressed in Angiosarcomas Dependent on MYC Amplification<br>Antoine Italiano, et al            | <a href="https://www.ncbi.nlm.nih.gov/pmc/articles/PMC3360479/">https://www.ncbi.nlm.nih.gov/pmc/articles/PMC3360479/</a>                                                                                                            |
| CCND1   | PMID:21283765<br>PMID:23246221 | PLoS One. 2011<br>MicroRNAs MiR-17, MiR-20a, and MiR-106b Act in Concert to Modulate E2F Activity on Cell Cycle Arrest during Neuronal Lineage Differentiation of USSC<br>Hans-Ingo Trompeter, et al | <a href="https://www.ncbi.nlm.nih.gov/pmc/articles/PMC3024412/">https://www.ncbi.nlm.nih.gov/pmc/articles/PMC3024412/</a><br><a href="https://www.ncbi.nlm.nih.gov/pubmed/23246221">https://www.ncbi.nlm.nih.gov/pubmed/23246221</a> |
| MiR-18a | THBS1                          | Nucleic Acid Ther. 2014 Apr;<br>Multiple microRNAs derived from chemically synthesized precursors regulate thrombospondin 1 expression.<br>Dogar AM, et al                                           | <a href="https://www.ncbi.nlm.nih.gov/pubmed/24444023">https://www.ncbi.nlm.nih.gov/pubmed/24444023</a>                                                                                                                              |

Sheet 1

|         |           |                                |                                                                                                                                                                                                                                                                     |                                                                                                                                                                                                                                      |
|---------|-----------|--------------------------------|---------------------------------------------------------------------------------------------------------------------------------------------------------------------------------------------------------------------------------------------------------------------|--------------------------------------------------------------------------------------------------------------------------------------------------------------------------------------------------------------------------------------|
| MiR-19b | ABCA1     | PMID:25084135                  | Atherosclerosis. 2014 Sep<br>MicroRNA-19b promotes macrophage cholesterol accumulation and aortic atherosclerosis by targeting ATP-binding cassette transporter A1.<br>Lv YC, et al                                                                                 | <a href="https://www.ncbi.nlm.nih.gov/pubmed/25084135">https://www.ncbi.nlm.nih.gov/pubmed/25084135</a>                                                                                                                              |
| MiR-20a | CCND1     | PMID:21283765<br>PMID:23246221 | PLoS One. 2011<br>MicroRNAs MiR-17, MiR-20a, and MiR-106b Act in Concert to Modulate E2F Activity on Cell Cycle Arrest during Neuronal Lineage Differentiation of USSC<br>Hans-Ingo Trompeter, et al                                                                | <a href="https://www.ncbi.nlm.nih.gov/pmc/articles/PMC3024412/">https://www.ncbi.nlm.nih.gov/pmc/articles/PMC3024412/</a><br><a href="https://www.ncbi.nlm.nih.gov/pubmed/23246221">https://www.ncbi.nlm.nih.gov/pubmed/23246221</a> |
|         | MCL1      | PMID:23594563                  | J Exp Clin Cancer Res. 2013;<br>Decrease expression of microRNA-20a promotes cancer cell proliferation and predicts poor survival of hepatocellular carcinoma<br>Ming-Qi Fan, et al                                                                                 | <a href="https://www.ncbi.nlm.nih.gov/pmc/articles/PMC3699415">https://www.ncbi.nlm.nih.gov/pmc/articles/PMC3699415</a>                                                                                                              |
|         | NTN4 (UP) | PMID:24972566                  | September 2014<br>miR-20a contributes to endometriosis by regulating NTN4 expression<br>Min Zhao, et al                                                                                                                                                             | <a href="http://link.springer.com/article/10.1007/s11033-014-3452-7">http://link.springer.com/article/10.1007/s11033-014-3452-7</a>                                                                                                  |
| MiR-25  | PTPRK     | PMID:27353001                  | Int J Mol Med. 2016 Aug;<br>PMCID: PMC4935456<br>Altered expression of mir-222 and mir-25 influences diverse gene expression changes in transformed normal and anaplastic thyroid cells, and impacts on MEK and TRAIL protein expression<br>Sinéad T. Aherne, et al | <a href="https://www.ncbi.nlm.nih.gov/pmc/articles/PMC4935456/">https://www.ncbi.nlm.nih.gov/pmc/articles/PMC4935456/</a>                                                                                                            |
|         | PAFAH1B1  | PMID:26035737                  | J Neural Eng. 2015 Aug<br>microRNA regulatory mechanism by which PLLA aligned nanofibers influence PC12 cell differentiation.<br>Yu Y, et al                                                                                                                        | <a href="https://www.ncbi.nlm.nih.gov/pubmed/26035737">https://www.ncbi.nlm.nih.gov/pubmed/26035737</a>                                                                                                                              |



Sheet 1

|               |       |               |                                                                                                                                                                                                                                                                                                                                       |                                                                                                                                                                     |
|---------------|-------|---------------|---------------------------------------------------------------------------------------------------------------------------------------------------------------------------------------------------------------------------------------------------------------------------------------------------------------------------------------|---------------------------------------------------------------------------------------------------------------------------------------------------------------------|
| MiR-27        | RYBP  | PMID:20815877 | Cooperative and individualistic functions of the microRNAs in the miR-23a~27a~24-2 cluster and its implication in human diseases<br>Ravindresh Chhabra, et al                                                                                                                                                                         | <a href="http://molecular-cancer.biomedcentral.com/articles/10.1186/1476-4598-9-232">http://molecular-cancer.biomedcentral.com/articles/10.1186/1476-4598-9-232</a> |
| MiR-27b       | ABCA1 | PMID:26520906 | Atherosclerosis. 2015 Dec<br>miR-27b inhibits LDLR and ABCA1 expression but does not influence plasma and hepatic lipid levels in mice.<br>Goedeke L, et al                                                                                                                                                                           | <a href="https://www.ncbi.nlm.nih.gov/pubmed/26520906">https://www.ncbi.nlm.nih.gov/pubmed/26520906</a>                                                             |
|               | PAPPA | PMID:24188450 | Gynecol Endocrinol. 2014 Jan;<br>Profiling of differentially expressed microRNAs in premature ovarian failure in an animal model.<br>Kuang H, et al                                                                                                                                                                                   | <a href="https://www.ncbi.nlm.nih.gov/pubmed/24188450">https://www.ncbi.nlm.nih.gov/pubmed/24188450</a>                                                             |
|               | EphB2 | PMID:22207734 | miR-27b controls venous specification and tip cell fate<br>Dauren Biyashev, et al                                                                                                                                                                                                                                                     | <a href="http://www.bloodjournal.org/content/119/11/2679?sso-checked=true">http://www.bloodjournal.org/content/119/11/2679?sso-checked=true</a>                     |
| MiR-30 family | SOX9  | PMID:27261459 | J Biol Chem. 2016 Jul 29;<br>PMCID: PMC4965549<br>miR-30 Family Controls Proliferation and Differentiation of Intestinal Epithelial Cell Models by Directing a Broad Gene Expression Program That Includes SOX9 and the Ubiquitin Ligase Pathway*An external file that holds a picture, illustration, etc<br>Bailey C. E. Peck, et al | <a href="https://www.ncbi.nlm.nih.gov/pmc/articles/PMC4965549/">https://www.ncbi.nlm.nih.gov/pmc/articles/PMC4965549/</a>                                           |

Sheet 1

|        |                                |                                                                                                                                                                                                                                                                                                      |                                                                                                                                                                                                                    |
|--------|--------------------------------|------------------------------------------------------------------------------------------------------------------------------------------------------------------------------------------------------------------------------------------------------------------------------------------------------|--------------------------------------------------------------------------------------------------------------------------------------------------------------------------------------------------------------------|
| PTPRK  | PMID:17434290                  | Maturational arrest of thymocyte development is caused by a deletion in the receptor-like protein tyrosine phosphatase $\kappa$ gene in LEC rats<br>Hiroyuki Kose, et al                                                                                                                             | <a href="http://www.sciencedirect.com/science/article/pii/S0888754307000560">http://www.sciencedirect.com/science/article/pii/S0888754307000560</a>                                                                |
| SOX9   |                                | Cell Prolif. 2016 Apr;<br>MicroRNA-30a promotes extracellular matrix degradation in articular cartilage via downregulation of Sox9.<br>Chang T, et al                                                                                                                                                | <a href="https://www.ncbi.nlm.nih.gov/pubmed/26969024">https://www.ncbi.nlm.nih.gov/pubmed/26969024</a>                                                                                                            |
| BCL2   | PMID:24178239<br>PMID:24293274 | Mol Cell Biochem. (2014)<br>NF- $\kappa$ B-mediated miR-30b regulation in cardiomyocytes cell death by targeting Bcl-2.<br>Wei C, et al<br><br>J Pathol. 2014 Mar;<br>MicroRNA-30b functions as a tumour suppressor in human colorectal cancer by targeting KRAS, PIK3CD and BCL2.<br>Liao WT, et al | <a href="https://www.ncbi.nlm.nih.gov/pubmed/24178239">https://www.ncbi.nlm.nih.gov/pubmed/24178239</a><br><a href="https://www.ncbi.nlm.nih.gov/pubmed/24293274">https://www.ncbi.nlm.nih.gov/pubmed/24293274</a> |
| CAMK2D | PMID:23360843                  | J Investig Med. 2013 Mar;<br>MicroRNA-30b-5p is involved in the regulation of cardiac hypertrophy by targeting CaMKII $\delta$ .<br>He J, et al                                                                                                                                                      | <a href="https://www.ncbi.nlm.nih.gov/pubmed/23360843">https://www.ncbi.nlm.nih.gov/pubmed/23360843</a>                                                                                                            |
| NRP1   | PMID:25791621                  | Brain Res. 2015 Jun 22;<br>MicroRNA-30b promotes axon outgrowth of retinal ganglion cells by inhibiting Semaphorin3A expression.<br>Han F, et al                                                                                                                                                     | <a href="https://www.ncbi.nlm.nih.gov/pubmed/25791621">https://www.ncbi.nlm.nih.gov/pubmed/25791621</a>                                                                                                            |
| LPHN3  | PMID:27802793                  | Identification of crucial miRNAs and the targets in renal cortex of hypertensive patients by expression profiles<br>Guohua Wang, et al                                                                                                                                                               | <a href="http://www.tandfonline.com/doi/pdf/10.1080/0886022X.2016.1244083">http://www.tandfonline.com/doi/pdf/10.1080/0886022X.2016.1244083</a>                                                                    |

Sheet1

|         |       |                                |                                                                                                                                                                                                                                                                                                     |                                                                                                                                                                                                                      |
|---------|-------|--------------------------------|-----------------------------------------------------------------------------------------------------------------------------------------------------------------------------------------------------------------------------------------------------------------------------------------------------|----------------------------------------------------------------------------------------------------------------------------------------------------------------------------------------------------------------------|
| MiR-92  | THBS1 | PMID:22383169                  | Genes Chromosomes Cancer. 2012 Jun;<br>The miR-17-92 Cluster and Its Target THBS1 Are Differentially Expressed in Angiosarcomas Dependent on MYC Amplification<br>Antoine Italiano, et al                                                                                                           | <a href="https://www.ncbi.nlm.nih.gov/pmc/articles/PMC3360479/">https://www.ncbi.nlm.nih.gov/pmc/articles/PMC3360479/</a>                                                                                            |
| MiR-93  | ABCA1 | PMID:25785043                  | Int J Clin Exp Med. 2015 Jan;<br>Up-regulated miR-93 contributes to coronary atherosclerosis pathogenesis through targeting ABCA1.<br>He Y, et al                                                                                                                                                   | <a href="https://www.ncbi.nlm.nih.gov/pubmed/25785043">https://www.ncbi.nlm.nih.gov/pubmed/25785043</a>                                                                                                              |
| MiR-96  | HDAC9 | PMID:27558292<br>PMID:23360843 | The microRNA cluster miR-183/96/182 contributes to long-term memory in a protein phosphatase 1-dependent manner<br>Bisrat T. Woldemichael, et al<br>J Investig Med. 2013 Mar;<br>MicroRNA-30b-5p is involved in the regulation of cardiac hypertrophy by targeting CaMKII $\delta$ .<br>He J, et al | <a href="http://www.nature.com/articles/ncomms12594">http://www.nature.com/articles/ncomms12594</a><br><br><a href="https://www.ncbi.nlm.nih.gov/pubmed/23360843/">https://www.ncbi.nlm.nih.gov/pubmed/23360843/</a> |
| MiR-181 | IRS2  |                                | Exp Cell Res. 2016 Oct 15;<br>MicroRNA-181b suppresses TAG via target IRS2 and regulating multiple genes in the Hippo pathway.<br>Chen Z, et al                                                                                                                                                     | <a href="https://www.ncbi.nlm.nih.gov/pubmed/27616141">https://www.ncbi.nlm.nih.gov/pubmed/27616141</a>                                                                                                              |
|         | BCL2  | PMID:24335172                  | Cell Physiol Biochem. (2013)<br>The function role of miR-181a in chemosensitivity to adriamycin by targeting Bcl-2 in low-invasive breast cancer cells.<br>Zhu Y, et al                                                                                                                             | <a href="https://www.ncbi.nlm.nih.gov/pubmed/24335172">https://www.ncbi.nlm.nih.gov/pubmed/24335172</a>                                                                                                              |

Sheet1

|         |         |                                |                                                                                                                                                                                                                                                                                                                                                                                                                                   |                                                                                                                                                                                                                                                                                         |
|---------|---------|--------------------------------|-----------------------------------------------------------------------------------------------------------------------------------------------------------------------------------------------------------------------------------------------------------------------------------------------------------------------------------------------------------------------------------------------------------------------------------|-----------------------------------------------------------------------------------------------------------------------------------------------------------------------------------------------------------------------------------------------------------------------------------------|
|         | SLC2A3  | PMID:25733820                  | Hsa-microRNA-181a is a regulator of a number of cancer genes and a biomarker for endometrial carcinoma in patients: a bioinformatic and clinical study and the therapeutic implication<br>He S, et al                                                                                                                                                                                                                             | <a href="https://www.dovepress.com/hsa-micromna-181a-is-a-regulator-of-a-number-of-cancer-genes-and-a-bio-peer-reviewed-fulltext-article-DDDT">https://www.dovepress.com/hsa-micromna-181a-is-a-regulator-of-a-number-of-cancer-genes-and-a-bio-peer-reviewed-fulltext-article-DDDT</a> |
| MiR-182 | BCL2    | PMID:22848417<br>PMID:23936432 | Role of MicroRNA-182 in Posterior Uveal Melanoma: Regulation of Tumor Development through MITF, BCL2 and Cyclin D2<br>Dongsheng Yan, et al<br><br>PloS one. 2013; 8(8):e70442<br>Inhibition of proliferation and induction of autophagy by atorvastatin in PC3 prostate cancer cells correlate with downregulation of Bcl2 and upregulation of miR-182 and p21.<br>Peng X, Li W, Yuan L, Mehta RG, Kopelovich L and McCormick DL. | <a href="http://journals.plos.org/plosone/article?id=10.1371/journal.pone.0040967">http://journals.plos.org/plosone/article?id=10.1371/journal.pone.0040967</a><br><a href="https://www.ncbi.nlm.nih.gov/pubmed/23936432">https://www.ncbi.nlm.nih.gov/pubmed/23936432</a>              |
|         | BHLHE41 |                                |                                                                                                                                                                                                                                                                                                                                                                                                                                   |                                                                                                                                                                                                                                                                                         |

Sheet 1

|         |       |                                       |                                                                                                                                                                                                                                                                                                     |                                                                                                                                                                                                                      |
|---------|-------|---------------------------------------|-----------------------------------------------------------------------------------------------------------------------------------------------------------------------------------------------------------------------------------------------------------------------------------------------------|----------------------------------------------------------------------------------------------------------------------------------------------------------------------------------------------------------------------|
|         | HDAC9 | PMID:275829<br>2<br>PMID:2336084<br>3 | The microRNA cluster miR-183/96/182 contributes to long-term memory in a protein phosphatase 1-dependent manner<br>Bisrat T. Woldemichael, et al<br>J Investig Med. 2013 Mar;<br>MicroRNA-30b-5p is involved in the regulation of cardiac hypertrophy by targeting CaMKII $\delta$ .<br>He J, et al | <a href="http://www.nature.com/articles/ncomms12594">http://www.nature.com/articles/ncomms12594</a><br><br><a href="https://www.ncbi.nlm.nih.gov/pubmed/23360843/">https://www.ncbi.nlm.nih.gov/pubmed/23360843/</a> |
| MiR-183 | SOCS6 | PMID:2640052<br>4                     | Eur Rev Med Pharmacol Sci. 2015<br>MiR-21 and miR-183 can simultaneously target SOCS6 and modulate growth and invasion of hepatocellular carcinoma (HCC) cells.<br>Li ZB, et al                                                                                                                     | <a href="https://www.ncbi.nlm.nih.gov/pubmed/26400524">https://www.ncbi.nlm.nih.gov/pubmed/26400524</a>                                                                                                              |
|         | ABCA1 | PMID:2693515<br>4                     | Oncol Rep. 2016 May<br>MiR-183 functions as an oncogene by targeting ABCA1 in colon cancer.<br>Bi DP, et al                                                                                                                                                                                         | <a href="https://www.ncbi.nlm.nih.gov/pubmed/26935154">https://www.ncbi.nlm.nih.gov/pubmed/26935154</a>                                                                                                              |
|         | HDAC9 | PMID:275829<br>2<br>PMID:2336084<br>3 | The microRNA cluster miR-183/96/182 contributes to long-term memory in a protein phosphatase 1-dependent manner<br>Bisrat T. Woldemichael, et al<br>J Investig Med. 2013 Mar;<br>MicroRNA-30b-5p is involved in the regulation of cardiac hypertrophy by targeting CaMKII $\delta$ .<br>He J, et al | <a href="http://www.nature.com/articles/ncomms12594">http://www.nature.com/articles/ncomms12594</a><br><br><a href="https://www.ncbi.nlm.nih.gov/pubmed/23360843/">https://www.ncbi.nlm.nih.gov/pubmed/23360843/</a> |
| MiR-194 | THBS1 |                                       | Nucleic Acid Ther. 2014 Apr;<br>Multiple microRNAs derived from chemically synthesized precursors regulate thrombospondin 1 expression.<br>Dogar AM, et al                                                                                                                                          | <a href="https://www.ncbi.nlm.nih.gov/pubmed/24444023">https://www.ncbi.nlm.nih.gov/pubmed/24444023</a>                                                                                                              |

Sheet 1

|            |       |                   |                                                                                                                                                                              |                                                                                                                           |
|------------|-------|-------------------|------------------------------------------------------------------------------------------------------------------------------------------------------------------------------|---------------------------------------------------------------------------------------------------------------------------|
| MiR-195    | CCND1 | PMID:2582392<br>5 | Oncotarget. 2015 Apr 20<br>PMCID: PMC4496189<br>MicroRNA profiling identifies<br>MiR-195 suppresses osteosarcoma<br>cell metastasis by targeting<br>CCND1<br>Kang Han, et al | <a href="https://www.ncbi.nlm.nih.gov/pmc/articles/PMC4496189/">https://www.ncbi.nlm.nih.gov/pmc/articles/PMC4496189/</a> |
| MiR let-7a | THBS1 |                   | Nucleic Acid Ther. 2014 Apr;<br>Multiple microRNAs derived from<br>chemically synthesized precursors<br>regulate thrombospondin 1<br>expression.<br>Dogar AM, et al          | <a href="https://www.ncbi.nlm.nih.gov/pubmed/24444023">https://www.ncbi.nlm.nih.gov/pubmed/24444023</a>                   |
| MiR-221    | THBS1 |                   | Nucleic Acid Ther. 2014 Apr;<br>Multiple microRNAs derived from<br>chemically synthesized precursors<br>regulate thrombospondin 1<br>expression.<br>Dogar AM, et al          | <a href="https://www.ncbi.nlm.nih.gov/pubmed/24444023">https://www.ncbi.nlm.nih.gov/pubmed/24444023</a>                   |
| MiR-222-3p | ZFPM2 | PMID:2516585<br>6 | PloS One. 2014;<br>PMCID: PMC4148428<br>Characterization of Circulating<br>MicroRNA Expression in Patients<br>with a Ventricular Septal Defect<br>Dong Li, et al             | <a href="https://www.ncbi.nlm.nih.gov/pmc/articles/PMC4148428/">https://www.ncbi.nlm.nih.gov/pmc/articles/PMC4148428/</a> |

Supplementary Table 7.2:

Comparison with Tarbase miRNA/Target genes for supplementary Figure S2A and S2B

## MiRNA Data Portal (BIOCOS Life Sciences)

[home](#)    [miRNA Info](#)    [miRNA Target](#)    [miRNA Pathways](#)  
[miRNAtoDisease](#)    [miRNA GeneOntology](#)

### miRNA Target gene Information

Show  entries      Search:

      

| miRNA ID      | Strong evidence | Weak Evidence                                                                   | Evidence Type                                                                                                                                                                                                                                                                                                                                                                                                                                                                                                                                                                                                                                                                                                                                                                                                                                                                                                                                                                                                                                                          |
|---------------|-----------------|---------------------------------------------------------------------------------|------------------------------------------------------------------------------------------------------------------------------------------------------------------------------------------------------------------------------------------------------------------------------------------------------------------------------------------------------------------------------------------------------------------------------------------------------------------------------------------------------------------------------------------------------------------------------------------------------------------------------------------------------------------------------------------------------------------------------------------------------------------------------------------------------------------------------------------------------------------------------------------------------------------------------------------------------------------------------------------------------------------------------------------------------------------------|
| hsa-let-7b-5p | AGO1            | RDX, CEP120, GALNT2, PTGFRN, PAK1, SCD, DICER1, UBE2I, RRM2, SMC1A, TAF9B, CALU | [Immunohistochemistry, Immunoprecipitaion, Luciferase reporter assay, Northern blot, qRT-PCR, Western blot: <b>PUB:23426184</b> , CLASH: <b>PUB:23622248</b> ] <b>AGO1</b><br>[Proteomics: <b>PUB:18668040</b> , PAR-CLIP: <b>PUB:21572407</b> , PAR-CLIP: <b>PUB:23446348</b> ] <b>RDX</b><br>[PAR-CLIP: <b>PUB:23592263</b> ] <b>CEP120</b><br>[Proteomics: <b>PUB:18668040</b> ] <b>GALNT2</b><br>[CLASH: <b>PUB:23622248</b> ] <b>PTGFRN</b><br>[CLASH: <b>PUB:23622248</b> ] <b>PAK1</b><br>[Proteomics: <b>PUB:18668040</b> , CLASH: <b>PUB:23622248</b> ] <b>SCD</b><br>[Immunoblot: <b>PUB:18812516</b> ] <b>DICER1</b><br>[Proteomics: <b>PUB:18668040</b> ] <b>UBE2I</b><br>[Microarray: <b>PUB:17699775</b> , Proteomics: <b>PUB:18668040</b> , PAR-CLIP: <b>PUB:21572407</b> ] <b>RRM2</b><br>[PAR-CLIP: <b>PUB:20371350</b> , PAR-CLIP: <b>PUB:21572407</b> , PAR-CLIP: <b>PUB:23446348</b> , CLASH: <b>PUB:23622248</b> ] <b>SMC1A</b><br>[pSILAC, Proteomics, Other: <b>PUB:18668040</b> ] <b>TAF9B</b><br>[PAR-CLIP: <b>PUB:20371350</b> ] <b>CALU</b> |
| hsa-let-7c-5p | DICER1, AGO1    | RDX, CEP120, RRM2, SMC1A, CALU, RAB5B                                           | [Western blot, Northern blot: <b>PUB:18700235</b> ] <b>DICER1</b><br>[Immunohistochemistry, Immunoprecipitaion, Luciferase reporter assay, Northern blot, qRT-PCR, Western blot: <b>PUB:23426184</b> , CLASH: <b>PUB:23622248</b> ] <b>AGO1</b><br>[PAR-CLIP: <b>PUB:21572407</b> , PAR-CLIP: <b>PUB:23446348</b> ] <b>RDX</b><br>[PAR-CLIP: <b>PUB:23592263</b> ] <b>CEP120</b><br>[PAR-CLIP: <b>PUB:21572407</b> ] <b>RRM2</b><br>[PAR-CLIP: <b>PUB:20371350</b> , PAR-CLIP: <b>PUB:21572407</b> , PAR-CLIP: <b>PUB:23446348</b> ] <b>SMC1A</b><br>[PAR-CLIP: <b>PUB:20371350</b> ] <b>CALU</b><br>[CLASH: <b>PUB:23622248</b> ] <b>RAB5B</b>                                                                                                                                                                                                                                                                                                                                                                                                                        |
| hsa-let-7d-5p | DICER1          | RDX, CEP120, RRM2, SMC1A, CALU                                                  | [Luciferase reporter assay, Western blot, Northern blot: <b>PUB:18700235</b> ] <b>DICER1</b><br>[PAR-CLIP: <b>PUB:21572407</b> , PAR-CLIP: <b>PUB:23446348</b> ] <b>RDX</b><br>[Sequencing: <b>PUB:20371350</b> , PAR-CLIP: <b>PUB:23592263</b> ] <b>CEP120</b>                                                                                                                                                                                                                                                                                                                                                                                                                                                                                                                                                                                                                                                                                                                                                                                                        |



| miRNA ID        | Strong evidence | Weak Evidence                                                                              | Evidence Type                                                                                                                                                                                                                                                                                                                                                                                                                                                                                                                                                                                                                                                                                                                                             |
|-----------------|-----------------|--------------------------------------------------------------------------------------------|-----------------------------------------------------------------------------------------------------------------------------------------------------------------------------------------------------------------------------------------------------------------------------------------------------------------------------------------------------------------------------------------------------------------------------------------------------------------------------------------------------------------------------------------------------------------------------------------------------------------------------------------------------------------------------------------------------------------------------------------------------------|
|                 |                 |                                                                                            | [PAR-CLIP: <b>PUB:21572407</b> ] <b>RRM2</b><br>[PAR-CLIP: <b>PUB:20371350</b> ,<br>PAR-CLIP: <b>PUB:21572407</b> ,<br>PAR-CLIP: <b>PUB:23446348</b> ] <b>SMC1A</b><br>[PAR-CLIP: <b>PUB:20371350</b> ] <b>CALU</b>                                                                                                                                                                                                                                                                                                                                                                                                                                                                                                                                       |
| hsa-let-7e-5p   | AGO1,<br>SMC1A  | RDX, CEP120,<br>SCD, RRM2,<br>CALU                                                         | [Immunohistochemistry,<br>Immunoprecipitation, Luciferase reporter<br>assay, Northern blot, qRT-PCR, Western<br>blot: <b>PUB:23426184</b> ,<br>CLASH: <b>PUB:23622248</b> ] <b>AGO1</b><br>[Luciferase reporter assay, Reporter<br>assay, Other: <b>PUB:15131085</b> ,<br>PAR-CLIP: <b>PUB:20371350</b> ,<br>PAR-CLIP: <b>PUB:21572407</b> ,<br>PAR-CLIP: <b>PUB:23446348</b> ] <b>SMC1A</b><br>[PAR-CLIP: <b>PUB:21572407</b> ,<br>PAR-CLIP: <b>PUB:23446348</b> ,<br>CLASH: <b>PUB:23622248</b> ] <b>RDX</b><br>[PAR-CLIP: <b>PUB:23592263</b> ] <b>CEP120</b><br>[CLASH: <b>PUB:23622248</b> ] <b>SCD</b><br>[PAR-CLIP: <b>PUB:21572407</b> ] <b>RRM2</b><br>[PAR-CLIP: <b>PUB:20371350</b> ] <b>CALU</b>                                              |
| hsa-let-7i-5p   |                 | RDX, CEP120,<br>RRM2,<br>SMC1A, CALU                                                       | [PAR-CLIP: <b>PUB:21572407</b> ,<br>PAR-CLIP: <b>PUB:23446348</b> ] <b>RDX</b><br>[PAR-CLIP: <b>PUB:23592263</b> ] <b>CEP120</b><br>[PAR-CLIP: <b>PUB:21572407</b> ] <b>RRM2</b><br>[PAR-CLIP: <b>PUB:20371350</b> ,<br>PAR-CLIP: <b>PUB:21572407</b> ,<br>PAR-CLIP: <b>PUB:23446348</b> ] <b>SMC1A</b><br>[PAR-CLIP: <b>PUB:20371350</b> ] <b>CALU</b>                                                                                                                                                                                                                                                                                                                                                                                                   |
| hsa-miR-106a-5p | MAPK9           | RPS6KA5,<br>PTGFRN,<br>MINK1,<br>GNPTAB,<br>SCD, DPYSL2,<br>AGO1, RRM2,<br>RAB5B,<br>USP48 | [Immunoblot, Luciferase reporter assay,<br>qRT-PCR: <b>PUB:23029228</b> ] <b>MAPK9</b><br>[PAR-CLIP: <b>PUB:21572407</b> ,<br>PAR-CLIP: <b>PUB:22012620</b> ] <b>RPS6KA5</b><br>[PAR-CLIP: <b>PUB:23592263</b> ] <b>PTGFRN</b><br>[HITS-CLIP: <b>PUB:23313552</b> ] <b>MINK1</b><br>[PAR-CLIP: <b>PUB:21572407</b> ] <b>GNPTAB</b><br>[PAR-CLIP: <b>PUB:21572407</b> ] <b>SCD</b><br>[PAR-CLIP: <b>PUB:22012620</b> ] <b>DPYSL2</b><br>[CLASH: <b>PUB:23622248</b> ] <b>AGO1</b><br>[PAR-CLIP: <b>PUB:23592263</b> ] <b>RRM2</b><br>[PAR-CLIP: <b>PUB:20371350</b> ,<br>PAR-CLIP: <b>PUB:21572407</b> ,<br>PAR-CLIP: <b>PUB:23446348</b> ,<br>PAR-CLIP: <b>PUB:23592263</b> ] <b>RAB5B</b><br>[PAR-CLIP,<br>HITS-CLIP: <b>PUB:21572407</b> ] <b>USP48</b> |
| hsa-miR-125b-5p | IKZF4           | EPHA7                                                                                      | [Luciferase reporter assay, Microarray,<br>qRT-PCR, Western<br>blot: <b>PUB:22723551</b> ] <b>IKZF4</b><br>[CLASH: <b>PUB:23622248</b> ] <b>EPHA7</b>                                                                                                                                                                                                                                                                                                                                                                                                                                                                                                                                                                                                     |
| hsa-miR-139-5p  |                 | PTGFRN                                                                                     | [HITS-CLIP: <b>PUB:23313552</b> ] <b>PTGFRN</b>                                                                                                                                                                                                                                                                                                                                                                                                                                                                                                                                                                                                                                                                                                           |
| hsa-miR-148b-3p |                 | DCP2,<br>FAM81A,<br>TMEM47,<br>DICER1,<br>AGO1, USP48                                      | [Microarray: <b>PUB:17612493</b> ] <b>DCP2</b><br>[Microarray: <b>PUB:17612493</b> ] <b>FAM81A</b><br>[Microarray: <b>PUB:17612493</b> ] <b>TMEM47</b><br>[PAR-CLIP: <b>PUB:21572407</b> ,<br>PAR-CLIP: <b>PUB:23592263</b> ] <b>DICER1</b><br>[Microarray: <b>PUB:17612493</b> ] <b>AGO1</b><br>[Microarray: <b>PUB:17612493</b> ] <b>USP48</b>                                                                                                                                                                                                                                                                                                                                                                                                          |

| miRNA ID       | Strong evidence    | Weak Evidence                                                                                      | Evidence Type                                                                                                                                                                                                                                                                                                                                                                                                                                                                                                                                                                                                                                                                                                                                                                                                                                                                                                                                                                                                                                                                                                                                                                                                                                                                                            |
|----------------|--------------------|----------------------------------------------------------------------------------------------------|----------------------------------------------------------------------------------------------------------------------------------------------------------------------------------------------------------------------------------------------------------------------------------------------------------------------------------------------------------------------------------------------------------------------------------------------------------------------------------------------------------------------------------------------------------------------------------------------------------------------------------------------------------------------------------------------------------------------------------------------------------------------------------------------------------------------------------------------------------------------------------------------------------------------------------------------------------------------------------------------------------------------------------------------------------------------------------------------------------------------------------------------------------------------------------------------------------------------------------------------------------------------------------------------------------|
| hsa-miR-155-5p | SSX2IP             | SNTB2, SCD, RRM2, CALU                                                                             | [Reporter assay, Other: <b>PUB:20584899</b> ] <b>SSX2IP</b><br>[Proteomics: <b>PUB:18668040</b> ] <b>SNTB2</b><br>[Proteomics: <b>PUB:18668040</b> ] <b>SCD</b><br>[Proteomics: <b>PUB:18668040</b> ] <b>RRM2</b><br>[Proteomics: <b>PUB:18668040</b> , HITS-CLIP: <b>PUB:22473208</b> ] <b>CALU</b>                                                                                                                                                                                                                                                                                                                                                                                                                                                                                                                                                                                                                                                                                                                                                                                                                                                                                                                                                                                                     |
| hsa-miR-15a-5p | RECK               | SNTB2, GTF2H1, MINK1, DICER1, CALU, USP48                                                          | [GFP reporter assay, qRT-PCR: <b>PUB:23176145</b> , PAR-CLIP: <b>PUB:21572407</b> ] <b>RECK</b><br>[PAR-CLIP: <b>PUB:21572407</b> , PAR-CLIP: <b>PUB:22012620</b> ] <b>SNTB2</b><br>[Microarray: <b>PUB:18362358</b> ] <b>GTF2H1</b><br>[HITS-CLIP: <b>PUB:22473208</b> ] <b>MINK1</b><br>[HITS-CLIP: <b>PUB:22473208</b> ] <b>DICER1</b><br>[HITS-CLIP: <b>PUB:22473208</b> , PAR-CLIP: <b>PUB:23592263</b> ] <b>CALU</b><br>[PAR-CLIP: <b>PUB:20371350</b> , PAR-CLIP: <b>PUB:21572407</b> ] <b>USP48</b>                                                                                                                                                                                                                                                                                                                                                                                                                                                                                                                                                                                                                                                                                                                                                                                              |
| hsa-miR-16-5p  | RECK               | SNTB2, GTF2H1, MINK1, IKZF4, DICER1, CALU, USP48, ELOVL5                                           | [Luciferase reporter assay, qRT-PCR, Western blot: <b>PUB:24852767</b> , Sequencing: <b>PUB:20371350</b> , PAR-CLIP: <b>PUB:21572407</b> ] <b>RECK</b><br>[PAR-CLIP: <b>PUB:21572407</b> , PAR-CLIP: <b>PUB:22012620</b> ] <b>SNTB2</b><br>[Microarray: <b>PUB:18362358</b> ] <b>GTF2H1</b><br>[HITS-CLIP: <b>PUB:22473208</b> ] <b>MINK1</b><br>[CLASH: <b>PUB:23622248</b> ] <b>IKZF4</b><br>[HITS-CLIP: <b>PUB:22473208</b> , CLASH: <b>PUB:23622248</b> ] <b>DICER1</b><br>[Sequencing: <b>PUB:20371350</b> , HITS-CLIP: <b>PUB:22473208</b> , PAR-CLIP: <b>PUB:23592263</b> ] <b>CALU</b><br>[PAR-CLIP: <b>PUB:20371350</b> , PAR-CLIP: <b>PUB:21572407</b> ] <b>USP48</b><br>[Proteomics: <b>PUB:18668040</b> ] <b>ELOVL5</b>                                                                                                                                                                                                                                                                                                                                                                                                                                                                                                                                                                      |
| hsa-miR-17-5p  | KAT2B, MAPK9, PKD2 | SNTB2, WDR37, RPS6KA5, SSX2IP, PTGFRN, MINK1, GNPTAB, SCD, DPYSL2, AGO1, RRM2, TAF9B, RAB5B, USP48 | [Immunocytochemistry, Luciferase reporter assay, qRT-PCR, Western blot: <b>PUB:23095762</b> ] <b>KAT2B</b><br>[qRT-PCR, Luciferase reporter assay, Western blot: <b>PUB:18700987</b> , Immunoblot, qRT-PCR: <b>PUB:23029228</b> , Luciferase reporter assay: <b>PUB:21283765</b> ] <b>MAPK9</b><br>[Luciferase reporter assay, qRT-PCR, Western blot: <b>PUB:19821056</b> ] <b>PKD2</b><br>[HITS-CLIP: <b>PUB:22473208</b> ] <b>SNTB2</b><br>[HITS-CLIP: <b>PUB:22473208</b> ] <b>WDR37</b><br>[PAR-CLIP: <b>PUB:21572407</b> , PAR-CLIP: <b>PUB:22012620</b> ] <b>RPS6KA5</b><br>[HITS-CLIP: <b>PUB:22473208</b> ] <b>SSX2IP</b><br>[PAR-CLIP: <b>PUB:23592263</b> ] <b>PTGFRN</b><br>[HITS-CLIP: <b>PUB:22473208</b> , HITS-CLIP: <b>PUB:23313552</b> ] <b>MINK1</b><br>[PAR-CLIP: <b>PUB:21572407</b> ] <b>GNPTAB</b><br>[PAR-CLIP: <b>PUB:21572407</b> ] <b>SCD</b><br>[PAR-CLIP: <b>PUB:22012620</b> , CLASH: <b>PUB:23622248</b> ] <b>DPYSL2</b><br>[HITS-CLIP: <b>PUB:22473208</b> , CLASH: <b>PUB:23622248</b> ] <b>AGO1</b><br>[HITS-CLIP: <b>PUB:22473208</b> , PAR-CLIP: <b>PUB:23592263</b> ] <b>RRM2</b><br>[CLASH: <b>PUB:23622248</b> ] <b>TAF9B</b><br>[PAR-CLIP: <b>PUB:20371350</b> , PAR-CLIP: <b>PUB:21572407</b> , HITS-CLIP: <b>PUB:22473208</b> , PAR-CLIP: <b>PUB:23446348</b> , |

| miRNA ID        | Strong evidence | Weak Evidence                                  | Evidence Type                                                                                                                                                                                                                                                                                                                                                                                                                                                                                                                     |
|-----------------|-----------------|------------------------------------------------|-----------------------------------------------------------------------------------------------------------------------------------------------------------------------------------------------------------------------------------------------------------------------------------------------------------------------------------------------------------------------------------------------------------------------------------------------------------------------------------------------------------------------------------|
|                 |                 |                                                | PAR-CLIP: <b>PUB:23592263</b> ,<br>CLASH: <b>PUB:23622248</b> ] <b>RAB5B</b><br>[PAR-CLIP,<br>HITS-CLIP: <b>PUB:21572407</b> ] <b>USP48</b>                                                                                                                                                                                                                                                                                                                                                                                       |
| hsa-miR-181a-5p | KAT2B           | SSX2IP, SCD, MAP4K4                            | [Western blot, Luciferase reporter assay: <b>PUB:18728182</b> ] <b>KAT2B</b><br>[HITS-CLIP: <b>PUB:22473208</b> ] <b>SSX2IP</b><br>[Sequencing: <b>PUB:20371350</b> ,<br>PAR-CLIP: <b>PUB:21572407</b> ,<br>PAR-CLIP: <b>PUB:23446348</b> ] <b>SCD</b><br>[Microarray: <b>PUB:22942087</b> ] <b>MAP4K4</b>                                                                                                                                                                                                                        |
| hsa-miR-182-5p  | RECK            |                                                | [Luciferase reporter assay: <b>PUB:23226455</b> , Luciferase reporter assay, qRT-PCR, Western blot: <b>PUB:23333633</b> , Luciferase reporter assay: <b>PUB:23383207</b> ,<br>PAR-CLIP: <b>PUB:21572407</b> ] <b>RECK</b>                                                                                                                                                                                                                                                                                                         |
| hsa-miR-183-5p  |                 | INSIG1, RAB5B                                  | [CLASH: <b>PUB:23622248</b> ] <b>INSIG1</b><br>[CLASH: <b>PUB:23622248</b> ] <b>RAB5B</b>                                                                                                                                                                                                                                                                                                                                                                                                                                         |
| hsa-miR-18a-5p  | DICER1          | RPS6KA5                                        | [Immunohistochemistry, In situ hybridization, Luciferase reporter assay, Microarray, qRT-PCR, Western blot: <b>PUB:23097559</b> ,<br>Sequencing: <b>PUB:20371350</b> ] <b>DICER1</b><br>[PAR-CLIP: <b>PUB:21572407</b> ] <b>RPS6KA5</b>                                                                                                                                                                                                                                                                                           |
| hsa-miR-18b-5p  |                 | RPS6KA5                                        | [PAR-CLIP: <b>PUB:21572407</b> ] <b>RPS6KA5</b>                                                                                                                                                                                                                                                                                                                                                                                                                                                                                   |
| hsa-miR-192-5p  | DICER1          | INSIG1, KAT2B, ICK, SCD, TAF9B, MAPK9, ELOVL5  | [Luciferase reporter assay, qRT-PCR, Western blot: <b>PUB:24223844</b> ,<br>Microarray: <b>PUB:19074876</b> ] <b>DICER1</b><br>[Microarray: <b>PUB:19074876</b> ] <b>INSIG1</b><br>[Microarray: <b>PUB:19074876</b> ] <b>KAT2B</b><br>[Microarray: <b>PUB:19074876</b> ,<br>PAR-CLIP: <b>PUB:22012620</b> ] <b>ICK</b><br>[Microarray: <b>PUB:19074876</b> ] <b>SCD</b><br>[Microarray: <b>PUB:19074876</b> ] <b>TAF9B</b><br>[Microarray: <b>PUB:19074876</b> ] <b>MAPK9</b><br>[Microarray: <b>PUB:19074876</b> ] <b>ELOVL5</b> |
| hsa-miR-195-5p  | DICER1          | SNTB2, RECK, MINK1, AGO1, CALU, USP48          | [qRT-PCR, Western blot: <b>PUB:23671264</b> ,<br>HITS-CLIP: <b>PUB:22473208</b> ] <b>DICER1</b><br>[PAR-CLIP: <b>PUB:21572407</b> ,<br>PAR-CLIP: <b>PUB:22012620</b> ] <b>SNTB2</b><br>[PAR-CLIP: <b>PUB:21572407</b> ] <b>RECK</b><br>[HITS-CLIP: <b>PUB:22473208</b> ] <b>MINK1</b><br>[CLASH: <b>PUB:23622248</b> ] <b>AGO1</b><br>[HITS-CLIP: <b>PUB:22473208</b> ,<br>PAR-CLIP: <b>PUB:23592263</b> ] <b>CALU</b><br>[PAR-CLIP: <b>PUB:20371350</b> ,<br>PAR-CLIP: <b>PUB:21572407</b> ] <b>USP48</b>                        |
| hsa-miR-19b-3p  | KAT2B           | DCP2, GNPTAB, SCD, DICER1, AGO1, RAB5B, ELOVL5 | [Western blot, Luciferase reporter assay: <b>PUB:18728182</b> ] <b>KAT2B</b><br>[HITS-CLIP: <b>PUB:22473208</b> ] <b>DCP2</b><br>[PAR-CLIP: <b>PUB:21572407</b> ] <b>GNPTAB</b><br>[HITS-CLIP: <b>PUB:22473208</b> ] <b>SCD</b><br>[PAR-CLIP: <b>PUB:21572407</b> ,<br>PAR-CLIP: <b>PUB:23592263</b> ] <b>DICER1</b><br>[Sequencing: <b>PUB:20371350</b> ,<br>HITS-CLIP: <b>PUB:22473208</b> ] <b>AGO1</b><br>[Sequencing, PAR-CLIP: <b>PUB:20371350</b> ,<br>PAR-CLIP: <b>PUB:21572407</b> ,                                     |

| miRNA ID       | Strong evidence                  | Weak Evidence                                                                                                                                   | Evidence Type                                                                                                                                                                                                                                                                                                                                                                                                                                                                                                                                                                                                                                                                                                                                                                                                                                                                                                                                                                                                                                                                                                                          |
|----------------|----------------------------------|-------------------------------------------------------------------------------------------------------------------------------------------------|----------------------------------------------------------------------------------------------------------------------------------------------------------------------------------------------------------------------------------------------------------------------------------------------------------------------------------------------------------------------------------------------------------------------------------------------------------------------------------------------------------------------------------------------------------------------------------------------------------------------------------------------------------------------------------------------------------------------------------------------------------------------------------------------------------------------------------------------------------------------------------------------------------------------------------------------------------------------------------------------------------------------------------------------------------------------------------------------------------------------------------------|
|                |                                  |                                                                                                                                                 | HITS-CLIP: <b>PUB:22473208</b> ,<br>PAR-CLIP: <b>PUB:23446348</b> ,<br>PAR-CLIP: <b>PUB:23592263</b> ] <b>RAB5B</b><br>[PAR-CLIP: <b>PUB:20371350</b> ,<br>PAR-CLIP: <b>PUB:21572407</b> ,<br>HITS-CLIP: <b>PUB:22473208</b> ,<br>PAR-CLIP: <b>PUB:23446348</b> ,<br>CLASH: <b>PUB:23622248</b> ] <b>ELOVL5</b>                                                                                                                                                                                                                                                                                                                                                                                                                                                                                                                                                                                                                                                                                                                                                                                                                        |
| hsa-miR-20a-5p | MAPK9                            | INSIG1,<br>SNTB2,<br>CEP120,<br>WDR37,<br>RPS6KA5,<br>SSX2IP,<br>PTGFRN,<br>MINK1,<br>GNPTAB,<br>SCD, DPYSL2,<br>AGO1, RRM2,<br>RAB5B,<br>USP48 | [Luciferase reporter assay: <b>PUB:21283765</b> ] <b>MAPK9</b><br>[CLASH: <b>PUB:23622248</b> ] <b>INSIG1</b><br>[HITS-CLIP: <b>PUB:22473208</b> ] <b>SNTB2</b><br>[CLASH: <b>PUB:23622248</b> ] <b>CEP120</b><br>[HITS-CLIP: <b>PUB:22473208</b> ] <b>WDR37</b><br>[PAR-CLIP: <b>PUB:21572407</b> ,<br>PAR-CLIP: <b>PUB:22012620</b> ] <b>RPS6KA5</b><br>[HITS-CLIP: <b>PUB:22473208</b> ] <b>SSX2IP</b><br>[PAR-CLIP: <b>PUB:23592263</b> ] <b>PTGFRN</b><br>[HITS-CLIP: <b>PUB:22473208</b> ,<br>HITS-CLIP: <b>PUB:23313552</b> ] <b>MINK1</b><br>[PAR-CLIP: <b>PUB:21572407</b> ] <b>GNPTAB</b><br>[PAR-CLIP: <b>PUB:21572407</b> ] <b>SCD</b><br>[PAR-CLIP: <b>PUB:22012620</b> ] <b>DPYSL2</b><br>[HITS-CLIP: <b>PUB:22473208</b> ,<br>CLASH: <b>PUB:23622248</b> ] <b>AGO1</b><br>[HITS-CLIP: <b>PUB:22473208</b> ,<br>PAR-CLIP: <b>PUB:23592263</b> ] <b>RRM2</b><br>[PAR-CLIP: <b>PUB:20371350</b> ,<br>PAR-CLIP: <b>PUB:21572407</b> ,<br>HITS-CLIP: <b>PUB:22473208</b> ,<br>PAR-CLIP: <b>PUB:23446348</b> ,<br>PAR-CLIP: <b>PUB:23592263</b> ] <b>RAB5B</b><br>[PAR-CLIP,<br>HITS-CLIP: <b>PUB:21572407</b> ] <b>USP48</b> |
| hsa-miR-221-3p | SSX2IP,<br>RECK, PAK1,<br>DICER1 |                                                                                                                                                 | [Luciferase reporter assay,<br>qRT-PCR: <b>PUB:23776679</b> ] <b>SSX2IP</b><br>[Luciferase reporter assay, qRT-PCR,<br>Western blot: <b>PUB:24269686</b> ] <b>RECK</b><br>[Luciferase reporter<br>assay: <b>PUB:23333386</b> ] <b>PAK1</b><br>[Luciferase reporter<br>assay: <b>PUB:21761362</b> ] <b>DICER1</b>                                                                                                                                                                                                                                                                                                                                                                                                                                                                                                                                                                                                                                                                                                                                                                                                                       |
| hsa-miR-222-3p | SSX2IP,<br>RECK,<br>DICER1       | MINK1                                                                                                                                           | [Luciferase reporter assay,<br>qRT-PCR: <b>PUB:23776679</b> ] <b>SSX2IP</b><br>[Luciferase reporter<br>assay: <b>PUB:22321642</b> ] <b>RECK</b><br>[Luciferase reporter<br>assay: <b>PUB:21761362</b> ] <b>DICER1</b><br>[CLASH: <b>PUB:23622248</b> ] <b>MINK1</b>                                                                                                                                                                                                                                                                                                                                                                                                                                                                                                                                                                                                                                                                                                                                                                                                                                                                    |
| hsa-miR-24-3p  | INSIG1                           | DCP2,<br>RPS6KA5,<br>PTGFRN,<br>RRM2                                                                                                            | [Immunofluorescence, qRT-PCR, Western<br>blot: <b>PUB:24677249</b> ,<br>PAR-CLIP: <b>PUB:20371350</b> ,<br>PAR-CLIP: <b>PUB:23592263</b> ,<br>PAR-CLIP: <b>PUB:24398324</b> ] <b>INSIG1</b><br>[Microarray: <b>PUB:19748357</b> ] <b>DCP2</b><br>[PAR-CLIP: <b>PUB:22100165</b> ] <b>RPS6KA5</b><br>[Sequencing: <b>PUB:20371350</b> ] <b>PTGFRN</b><br>[qRT-PCR,<br>Microarray: <b>PUB:19748357</b> ] <b>RRM2</b>                                                                                                                                                                                                                                                                                                                                                                                                                                                                                                                                                                                                                                                                                                                     |
| hsa-miR-25-3p  | KAT2B, RECK                      | INSIG1,<br>SNTB2,<br>AGO1, EXOC5                                                                                                                | [Western blot, Luciferase reporter<br>assay: <b>PUB:18728182</b> ] <b>KAT2B</b><br>[Luciferase reporter assay, qRT-PCR,<br>Western blot: <b>PUB:24078004</b> ] <b>RECK</b><br>[PAR-CLIP: <b>PUB:23592263</b> ] <b>INSIG1</b>                                                                                                                                                                                                                                                                                                                                                                                                                                                                                                                                                                                                                                                                                                                                                                                                                                                                                                           |

| miRNA ID       | Strong evidence | Weak Evidence                                 | Evidence Type                                                                                                                                                                                                                                                                                                                                                                                          |
|----------------|-----------------|-----------------------------------------------|--------------------------------------------------------------------------------------------------------------------------------------------------------------------------------------------------------------------------------------------------------------------------------------------------------------------------------------------------------------------------------------------------------|
|                |                 |                                               | [CLASH:PUB:23622248] <b>SNTB2</b><br>[CLASH:PUB:23622248] <b>AGO1</b><br>[PAR-CLIP:PUB:21572407] <b>EXOC5</b>                                                                                                                                                                                                                                                                                          |
| hsa-miR-27b-3p |                 | ICK, USP46, MAPK9                             | [PAR-CLIP:PUB:23592263] <b>ICK</b><br>[PAR-CLIP:PUB:23592263] <b>USP46</b><br>[CLASH:PUB:23622248] <b>MAPK9</b>                                                                                                                                                                                                                                                                                        |
| hsa-miR-30a-5p | SEPT7           | PTGFRN, ITGA6, GTF2H1, SCD, RRM2, ELOVL5      | [Luciferase reporter assay:PUB:23383034] <b>SEPT7</b><br>[pSILAC, Proteomics, Other:PUB:18668040] <b>PTGFRN</b><br>[Proteomics:PUB:18668040] <b>ITGA6</b><br>[Proteomics:PUB:18668040] <b>GTF2H1</b><br>[Proteomics:PUB:18668040] <b>SCD</b><br>[Proteomics:PUB:18668040, HITS-CLIP:PUB:22473208, PAR-CLIP:PUB:23592263] <b>RRM2</b><br>[Proteomics:PUB:18668040, PAR-CLIP:PUB:21572407] <b>ELOVL5</b> |
| hsa-miR-30b-5p |                 | SNTB2, WDR37, IKZF4, RRM2, ELOVL5             | [Sequencing:PUB:20371350] <b>SNTB2</b><br>[CLASH:PUB:23622248] <b>WDR37</b><br>[CLASH:PUB:23622248] <b>IKZF4</b><br>[HITS-CLIP:PUB:22473208, PAR-CLIP:PUB:23592263] <b>RRM2</b><br>[PAR-CLIP:PUB:21572407] <b>ELOVL5</b>                                                                                                                                                                               |
| hsa-miR-30c-5p | UBE2I           | IKZF4, DPYSL2, AGO1, RRM2, ELOVL5             | [Luciferase reporter assay, qRT-PCR, Western blot:PUB:19223510] <b>UBE2I</b><br>[CLASH:PUB:23622248] <b>IKZF4</b><br>[CLASH:PUB:23622248] <b>DPYSL2</b><br>[CLASH:PUB:23622248] <b>AGO1</b><br>[HITS-CLIP:PUB:22473208, PAR-CLIP:PUB:23592263, CLASH:PUB:23622248] <b>RRM2</b><br>[PAR-CLIP:PUB:21572407] <b>ELOVL5</b>                                                                                |
| hsa-miR-30e-5p | UBE2I           | RRM2, ELOVL5                                  | [Luciferase reporter assay, qRT-PCR, Western blot:PUB:19223510] <b>UBE2I</b><br>[HITS-CLIP:PUB:22473208, PAR-CLIP:PUB:23592263] <b>RRM2</b><br>[PAR-CLIP:PUB:21572407] <b>ELOVL5</b>                                                                                                                                                                                                                   |
| hsa-miR-342-3p |                 | INSIG1, RRM2                                  | [PAR-CLIP:PUB:20371350, PAR-CLIP:PUB:21572407] <b>INSIG1</b><br>[CLASH:PUB:23622248] <b>RRM2</b>                                                                                                                                                                                                                                                                                                       |
| hsa-miR-361-5p |                 |                                               |                                                                                                                                                                                                                                                                                                                                                                                                        |
| hsa-miR-454-3p |                 | SNTB2, RPS6KA5, GNPTAB, DPYSL2, DICER1, RAB5B | [HITS-CLIP:PUB:23824327] <b>SNTB2</b><br>[PAR-CLIP:PUB:21572407] <b>RPS6KA5</b><br>[PAR-CLIP:PUB:21572407] <b>GNPTAB</b><br>[PAR-CLIP:PUB:22012620] <b>DPYSL2</b><br>[HITS-CLIP:PUB:19536157, PAR-CLIP:PUB:21572407, PAR-CLIP:PUB:23592263, HITS-CLIP:PUB:23824327] <b>DICER1</b><br>[PAR-CLIP:PUB:20371350, PAR-CLIP:PUB:21572407, PAR-CLIP:PUB:23446348, PAR-CLIP:PUB:23592263] <b>RAB5B</b>         |
| hsa-miR-93-5p  | KAT2B, MAPK9    | SNTB2, EPHA7, WDR37,                          | [Western blot, Luciferase reporter assay:PUB:18728182] <b>KAT2B</b><br>[Luciferase reporter                                                                                                                                                                                                                                                                                                            |

| miRNA ID | Strong evidence | Weak Evidence                                                                              | Evidence Type                                                                                                                                                                                                                                                                                                                                                                                                                                                                                                                                                                                                                                                                                                                                                                                                                                                                                                                                                                                                                                                                                                                                                                                                                                              |
|----------|-----------------|--------------------------------------------------------------------------------------------|------------------------------------------------------------------------------------------------------------------------------------------------------------------------------------------------------------------------------------------------------------------------------------------------------------------------------------------------------------------------------------------------------------------------------------------------------------------------------------------------------------------------------------------------------------------------------------------------------------------------------------------------------------------------------------------------------------------------------------------------------------------------------------------------------------------------------------------------------------------------------------------------------------------------------------------------------------------------------------------------------------------------------------------------------------------------------------------------------------------------------------------------------------------------------------------------------------------------------------------------------------|
|          |                 | RPS6KA5, SSX2IP, PTGFRN, MINK1, IKZF4, GNPTAB, SCD, DPYSL2, AGO1, RRM2, PKD2, RAB5B, USP48 | assay: <b>PUB:20065103</b> <b>MAPK9</b><br>[HITS-CLIP: <b>PUB:22473208</b> ] <b>SNTB2</b><br>[Sequencing: <b>PUB:20371350</b> ] <b>EPHA7</b><br>[HITS-CLIP: <b>PUB:22473208</b> ] <b>WDR37</b><br>[PAR-CLIP: <b>PUB:21572407</b> ,<br>PAR-CLIP: <b>PUB:22012620</b> ,<br>CLASH: <b>PUB:23622248</b> ] <b>RPS6KA5</b><br>[HITS-CLIP: <b>PUB:22473208</b> ] <b>SSX2IP</b><br>[PAR-CLIP: <b>PUB:23592263</b> ] <b>PTGFRN</b><br>[HITS-CLIP: <b>PUB:22473208</b> ,<br>HITS-CLIP: <b>PUB:23313552</b> ] <b>MINK1</b><br>[Sequencing: <b>PUB:20371350</b> ] <b>IKZF4</b><br>[PAR-CLIP: <b>PUB:21572407</b> ] <b>GNPTAB</b><br>[PAR-CLIP: <b>PUB:21572407</b> ] <b>SCD</b><br>[PAR-CLIP: <b>PUB:22012620</b> ] <b>DPYSL2</b><br>[Sequencing: <b>PUB:20371350</b> ,<br>HITS-CLIP: <b>PUB:22473208</b> ,<br>CLASH: <b>PUB:23622248</b> ] <b>AGO1</b><br>[HITS-CLIP: <b>PUB:22473208</b> ,<br>PAR-CLIP: <b>PUB:23592263</b> ] <b>RRM2</b><br>[Sequencing: <b>PUB:20371350</b> ] <b>PKD2</b><br>[Sequencing, PAR-CLIP: <b>PUB:20371350</b> ,<br>PAR-CLIP: <b>PUB:21572407</b> ,<br>HITS-CLIP: <b>PUB:22473208</b> ,<br>PAR-CLIP: <b>PUB:23446348</b> ,<br>PAR-CLIP: <b>PUB:23592263</b> ] <b>RAB5B</b><br>[PAR-CLIP,<br>HITS-CLIP: <b>PUB:21572407</b> ] <b>USP48</b> |

Showing 1 to 35 of 35 entries

First Previous

1

Next

Last

## MiRNA Data Portal (BIOCOS Life Sciences)

[home](#)    [miRNA Info](#)    [miRNA Target](#)    [miRNA Pathways](#)

[miRNAtoDisease](#)    [miRNA GeneOntology](#)

### miRNA Target gene Information

Show  entries    Search:

      

| miRNA ID        | Strong evidence    | Weak Evidence           | Evidence Type                                                                                                                                                                                                                                                                                                                                                                                                                                                                                                                                                                                                                                                                                                                                                         |
|-----------------|--------------------|-------------------------|-----------------------------------------------------------------------------------------------------------------------------------------------------------------------------------------------------------------------------------------------------------------------------------------------------------------------------------------------------------------------------------------------------------------------------------------------------------------------------------------------------------------------------------------------------------------------------------------------------------------------------------------------------------------------------------------------------------------------------------------------------------------------|
| hsa-let-7b-5p   | ACVR1, CCND1, IRS2 | MXD1, DPF2, SOX9, THBS1 | [Luciferase reporter assay, Microarray, qRT-PCR: <b>PUB:22995917</b> ] <b>ACVR1</b><br>[Immunoblot, Immunofluorescence, Luciferase reporter assay, qRT-PCR, Reporter assay, Other: <b>PUB:18379589</b> , immunoblot, Northern blot, Western blot: <b>PUB:20133835</b> , Microarray, Western blot, Annexin V-FITC: <b>PUB:23806108</b> , PAR-CLIP: <b>PUB:23592263</b> ] <b>CCND1</b><br>[Flow, Luciferase reporter assay, qRT-PCR, Western blot: <b>PUB:24810113</b> , CLASH: <b>PUB:23622248</b> ] <b>IRS2</b><br>[PAR-CLIP: <b>PUB:21572407</b> ] <b>MXD1</b><br>[Proteomics: <b>PUB:18668040</b> ] <b>DPF2</b><br>[Microarray: <b>PUB:17699775</b> ] <b>SOX9</b><br>[pSILAC, Proteomics, Other: <b>PUB:18668040</b> , PAR-CLIP: <b>PUB:24398324</b> ] <b>THBS1</b> |
| hsa-let-7c-5p   | BCL2L1             | MXD1, CCND1, THBS1      | [Luciferase reporter assay, qRT-PCR, Western blot: <b>PUB:20347499</b> , Western blot: <b>PUB:22917031</b> ] <b>BCL2L1</b><br>[PAR-CLIP: <b>PUB:21572407</b> ] <b>MXD1</b><br>[PAR-CLIP: <b>PUB:23592263</b> ] <b>CCND1</b><br>[PAR-CLIP: <b>PUB:24398324</b> ] <b>THBS1</b>                                                                                                                                                                                                                                                                                                                                                                                                                                                                                          |
| hsa-let-7d-5p   |                    | MXD1, CCND1, THBS1      | [PAR-CLIP: <b>PUB:21572407</b> ] <b>MXD1</b><br>[PAR-CLIP: <b>PUB:23592263</b> ] <b>CCND1</b><br>[Sequencing: <b>PUB:20371350</b> , PAR-CLIP: <b>PUB:24398324</b> ] <b>THBS1</b>                                                                                                                                                                                                                                                                                                                                                                                                                                                                                                                                                                                      |
| hsa-let-7e-5p   | CCND1              | MXD1, THBS1, IRS2       | [Luciferase reporter assay, qRT-PCR, Western blot: <b>PUB:21969366</b> , Western blot: <b>PUB:24100610</b> , PAR-CLIP: <b>PUB:23592263</b> ] <b>CCND1</b><br>[PAR-CLIP: <b>PUB:21572407</b> ] <b>MXD1</b><br>[PAR-CLIP: <b>PUB:24398324</b> ] <b>THBS1</b><br>[CLASH: <b>PUB:23622248</b> ] <b>IRS2</b>                                                                                                                                                                                                                                                                                                                                                                                                                                                               |
| hsa-let-7i-5p   |                    | MXD1, CCND1, THBS1      | [PAR-CLIP: <b>PUB:21572407</b> ] <b>MXD1</b><br>[PAR-CLIP: <b>PUB:23592263</b> ] <b>CCND1</b><br>[PAR-CLIP: <b>PUB:24398324</b> ] <b>THBS1</b>                                                                                                                                                                                                                                                                                                                                                                                                                                                                                                                                                                                                                        |
| hsa-miR-106a-5p | SLC2A3, CCND1      | RAD23B, NFAT5, F3       | [Luciferase reporter assay, qRT-PCR, Western blot: <b>PUB:24124917</b> ] <b>SLC2A3</b><br>[qRT-PCR, Western blot: <b>PUB:23836497</b> , PAR-CLIP: <b>PUB:20371350</b> , PAR-CLIP, HITS-CLIP: <b>PUB:21572407</b> , PAR-CLIP: <b>PUB:22012620</b> ,                                                                                                                                                                                                                                                                                                                                                                                                                                                                                                                    |

| miRNA ID        | Strong evidence  | Weak Evidence                                        | Evidence Type                                                                                                                                                                                                                                                                                                                                                                                                                                                                                                                                                                                                                                                                                                                                                                                                                                                                                                                                                                                                                                                     |
|-----------------|------------------|------------------------------------------------------|-------------------------------------------------------------------------------------------------------------------------------------------------------------------------------------------------------------------------------------------------------------------------------------------------------------------------------------------------------------------------------------------------------------------------------------------------------------------------------------------------------------------------------------------------------------------------------------------------------------------------------------------------------------------------------------------------------------------------------------------------------------------------------------------------------------------------------------------------------------------------------------------------------------------------------------------------------------------------------------------------------------------------------------------------------------------|
|                 |                  |                                                      | PAR-CLIP: <b>PUB:23446348</b> ,<br>PAR-CLIP: <b>PUB:23592263</b> ,<br>PAR-CLIP: <b>PUB:24398324</b> ] <b>CCND1</b><br>[CLASH: <b>PUB:23622248</b> ] <b>RAD23B</b><br>[PAR-CLIP: <b>PUB:20371350</b> ,<br>PAR-CLIP: <b>PUB:21572407</b> ,<br>PAR-CLIP: <b>PUB:23446348</b> ,<br>PAR-CLIP: <b>PUB:23592263</b> ] <b>NFAT5</b><br>[PAR-CLIP: <b>PUB:20371350</b> ,<br>PAR-CLIP: <b>PUB:21572407</b> ,<br>PAR-CLIP: <b>PUB:23446348</b> ,<br>PAR-CLIP: <b>PUB:23592263</b> ] <b>F3</b>                                                                                                                                                                                                                                                                                                                                                                                                                                                                                                                                                                                |
| hsa-miR-125b-5p | MXD1, MCL1, BCL2 | RYBP                                                 | [Immunofluorescence, Immunohistochemistry, Luciferase reporter assay, qRT-PCR, Western blot: <b>PUB:23099851</b> ] <b>MXD1</b><br>[Luciferase reporter assay, Western blot: <b>PUB:22824797</b> , qRT-PCR, Western blot: <b>PUB:22942733</b> ] <b>MCL1</b><br>[Luciferase reporter assay, Western blot: <b>PUB:22293115</b> ] <b>BCL2</b><br>[CLASH: <b>PUB:23622248</b> ] <b>RYBP</b>                                                                                                                                                                                                                                                                                                                                                                                                                                                                                                                                                                                                                                                                            |
| hsa-miR-139-5p  | MCL1             | SPRY4                                                | [Immunohistochemistry, Luciferase reporter assay, qRT-PCR, Western blot: <b>PUB:23551751</b> , Western blot: <b>PUB:23557151</b> , PAR-CLIP: <b>PUB:23592263</b> ] <b>MCL1</b><br>[PAR-CLIP: <b>PUB:23592263</b> ] <b>SPRY4</b>                                                                                                                                                                                                                                                                                                                                                                                                                                                                                                                                                                                                                                                                                                                                                                                                                                   |
| hsa-miR-148b-3p | ACVR1            |                                                      | [Luciferase reporter assay, qRT-PCR: <b>PUB:23227223</b> ] <b>ACVR1</b>                                                                                                                                                                                                                                                                                                                                                                                                                                                                                                                                                                                                                                                                                                                                                                                                                                                                                                                                                                                           |
| hsa-miR-155-5p  | CEP41, CCND1     | RAD23B, FNDC3B, NFAT5, THBS1                         | [Reporter assay, Other: <b>PUB:20584899</b> ] <b>CEP41</b><br>[Luciferase reporter assay, Western blot: <b>PUB:22858023</b> , Proteomics: <b>PUB:18668040</b> ] <b>CCND1</b><br>[Proteomics: <b>PUB:18668040</b> ] <b>RAD23B</b><br>[Proteomics: <b>PUB:18668040</b> ] <b>FNDC3B</b><br>[HITS-CLIP: <b>PUB:22473208</b> ] <b>NFAT5</b><br>[Proteomics: <b>PUB:18668040</b> ] <b>THBS1</b>                                                                                                                                                                                                                                                                                                                                                                                                                                                                                                                                                                                                                                                                         |
| hsa-miR-15a-5p  | BCL2, CCND1      | RAD23B, CPEB2, PAFAH1B1, OSBPL3, MCL1, SLC2A3, EFNB2 | [Luciferase reporter assay, qRT-PCR, Western blot: <b>PUB:16166262</b> , Luciferase reporter assay: <b>PUB:17707831</b> , Luciferase reporter assay: <b>PUB:19478946</b> , Western blot: <b>PUB:19903841</b> , Western blot: <b>PUB:20876285</b> , Microarray, qRT-PCR: <b>PUB:17260024</b> , proteomics analysis: <b>PUB:18362358</b> , HITS-CLIP: <b>PUB:22473208</b> ] <b>BCL2</b><br>[Luciferase reporter assay: <b>PUB:18931683</b> , Luciferase reporter assay: <b>PUB:19549910</b> , qRT-PCR, Luciferase reporter assay, Western blot: <b>PUB:19591824</b> , CLASH: <b>PUB:23622248</b> , PAR-CLIP: <b>PUB:24398324</b> ] <b>CCND1</b><br>[PAR-CLIP: <b>PUB:20371350</b> , HITS-CLIP: <b>PUB:22473208</b> ] <b>RAD23B</b><br>[HITS-CLIP: <b>PUB:22473208</b> ] <b>CPEB2</b><br>[HITS-CLIP: <b>PUB:22473208</b> ] <b>PAFAH1B1</b><br>[PAR-CLIP: <b>PUB:20371350</b> ] <b>OSBPL3</b><br>[Microarray: <b>PUB:18362358</b> ] <b>MCL1</b><br>[PAR-CLIP: <b>PUB:21572407</b> , PAR-CLIP: <b>PUB:23446348</b> ] <b>SLC2A3</b><br>[PAR-CLIP: <b>PUB:20371350</b> , |



| miRNA ID      | Strong evidence                | Weak Evidence                                                               | Evidence Type                                                                                                                                                                                                                                                                                                                                                                                                                                                                                                                                                                                                                                                                                                                                                                                                                                                                                                                                                                                                                                                                                                                                                                                                                                                                                                                                                                                                                                                                                                                                                                                                                                                                                                                                                                                                    |
|---------------|--------------------------------|-----------------------------------------------------------------------------|------------------------------------------------------------------------------------------------------------------------------------------------------------------------------------------------------------------------------------------------------------------------------------------------------------------------------------------------------------------------------------------------------------------------------------------------------------------------------------------------------------------------------------------------------------------------------------------------------------------------------------------------------------------------------------------------------------------------------------------------------------------------------------------------------------------------------------------------------------------------------------------------------------------------------------------------------------------------------------------------------------------------------------------------------------------------------------------------------------------------------------------------------------------------------------------------------------------------------------------------------------------------------------------------------------------------------------------------------------------------------------------------------------------------------------------------------------------------------------------------------------------------------------------------------------------------------------------------------------------------------------------------------------------------------------------------------------------------------------------------------------------------------------------------------------------|
|               |                                |                                                                             | PAR-CLIP: <b>PUB:22012620</b> ] <b>EFNB2</b>                                                                                                                                                                                                                                                                                                                                                                                                                                                                                                                                                                                                                                                                                                                                                                                                                                                                                                                                                                                                                                                                                                                                                                                                                                                                                                                                                                                                                                                                                                                                                                                                                                                                                                                                                                     |
| hsa-miR-16-5p | BCL2, CCND1                    | TMEM87A, RAD23B, CPEB2, PAFAH1B1, FNDC3B, OSBPL3, NRP1, MCL1, SLC2A3, EFNB2 | [Luciferase reporter assay, qRT-PCR, Western blot: <b>PUB:16166262</b> , Luciferase reporter assay: <b>PUB:17351108</b> , Luciferase reporter assay: <b>PUB:17707831</b> , Luciferase reporter assay: <b>PUB:17877811</b> , Western blot, Reporter assay: <b>PUB:18449891</b> , Western blot: <b>PUB:19269153</b> , Western blot: <b>PUB:19903841</b> , Immunohistochemistry, Microarray, Western blot: <b>PUB:20643754</b> , Western blot: <b>PUB:20876285</b> , Western blot: <b>PUB:23907579</b> , Western blot: <b>PUB:24148817</b> , proteomics analysis: <b>PUB:18362358</b> , Sequencing: <b>PUB:20371350</b> , HITS-CLIP: <b>PUB:22473208</b> ] <b>BCL2</b><br>[Western blot, Luciferase reporter assay: <b>PUB:18483394</b> , qRT-PCR, flow, Luciferase reporter assay: <b>PUB:18701644</b> , Luciferase reporter assay: <b>PUB:18931683</b> , Luciferase reporter assay: <b>PUB:19549910</b> , Luciferase reporter assay, Western blot: <b>PUB:19591824</b> , Western blot: <b>PUB:24148817</b> , PAR-CLIP: <b>PUB:24398324</b> ] <b>CCND1</b><br>[Proteomics: <b>PUB:18668040</b> ] <b>TMEM87A</b><br>[PAR-CLIP: <b>PUB:20371350</b> , HITS-CLIP: <b>PUB:22473208</b> ] <b>RAD23B</b><br>[HITS-CLIP: <b>PUB:22473208</b> ] <b>CPEB2</b><br>[HITS-CLIP: <b>PUB:22473208</b> ] <b>PAFAH1B1</b><br>[pSILAC, Proteomics, Other: <b>PUB:18668040</b> , Sequencing: <b>PUB:20371350</b> ] <b>FNDC3B</b><br>[Sequencing, PAR-CLIP: <b>PUB:20371350</b> , CLASH: <b>PUB:23622248</b> ] <b>OSBPL3</b><br>[Proteomics: <b>PUB:18668040</b> ] <b>NRP1</b><br>[Microarray: <b>PUB:18362358</b> ] <b>MCL1</b><br>[PAR-CLIP: <b>PUB:21572407</b> , PAR-CLIP: <b>PUB:23446348</b> ] <b>SLC2A3</b><br>[Proteomics: <b>PUB:18668040</b> , PAR-CLIP: <b>PUB:20371350</b> , PAR-CLIP: <b>PUB:22012620</b> ] <b>EFNB2</b> |
| hsa-miR-17-5p | SOCS6, BCL2, CCND1, RND3, ETV1 | PAFAH1B1, MCL1, NFAT5, NPAS2, F3, THBS1, ABCA1                              | [Luciferase reporter assay, qRT-PCR, Western blot: <b>PUB:24801601</b> ] <b>SOCS6</b><br>[Luciferase reporter assay: <b>PUB:19666108</b> , Luciferase reporter assay, qRT-PCR, Western blot: <b>PUB:24280866</b> ] <b>BCL2</b><br>[Luciferase reporter assay, qRT-PCR, Western blot: <b>PUB:18695042</b> , Luciferase reporter assay: <b>PUB:21283765</b> , PAR-CLIP: <b>PUB:20371350</b> , PAR-CLIP, HITS-CLIP: <b>PUB:21572407</b> , PAR-CLIP: <b>PUB:22012620</b> , PAR-CLIP: <b>PUB:23446348</b> , PAR-CLIP: <b>PUB:23592263</b> , PAR-CLIP: <b>PUB:24398324</b> ] <b>CCND1</b><br>[Luciferase reporter assay, qRT-PCR, Western blot: <b>PUB:22132820</b> ] <b>RND3</b><br>[Luciferase reporter assay, qRT-PCR, microarray, Western blotting: <b>PUB:23969726</b> ] <b>ETV1</b><br>[HITS-CLIP: <b>PUB:22473208</b> ] <b>PAFAH1B1</b><br>[HITS-CLIP: <b>PUB:22473208</b> ] <b>MCL1</b><br>[PAR-CLIP: <b>PUB:20371350</b> , PAR-CLIP: <b>PUB:21572407</b> , HITS-CLIP: <b>PUB:22473208</b> , PAR-CLIP: <b>PUB:23446348</b> ,                                                                                                                                                                                                                                                                                                                                                                                                                                                                                                                                                                                                                                                                                                                                                                                   |

| miRNA ID        | Strong evidence        | Weak Evidence                                      | Evidence Type                                                                                                                                                                                                                                                                                                                                                                                                                                                                                                                                                                                                                                                                          |
|-----------------|------------------------|----------------------------------------------------|----------------------------------------------------------------------------------------------------------------------------------------------------------------------------------------------------------------------------------------------------------------------------------------------------------------------------------------------------------------------------------------------------------------------------------------------------------------------------------------------------------------------------------------------------------------------------------------------------------------------------------------------------------------------------------------|
|                 |                        |                                                    | PAR-CLIP: <b>PUB:23592263</b> ,<br>CLASH: <b>PUB:23622248</b> ] <b>NFAT5</b><br>[CLASH: <b>PUB:23622248</b> ] <b>NPAS2</b><br>[PAR-CLIP: <b>PUB:20371350</b> ,<br>PAR-CLIP: <b>PUB:21572407</b> ,<br>PAR-CLIP: <b>PUB:23446348</b> ,<br>PAR-CLIP: <b>PUB:23592263</b> ] <b>F3</b><br>[Microarray,<br>qRT-PCR: <b>PUB:20940405</b> ] <b>THBS1</b><br>[HITS-CLIP: <b>PUB:22473208</b> ] <b>ABCA1</b>                                                                                                                                                                                                                                                                                     |
| hsa-miR-181a-5p | MCL1, BCL2             | FNDC3B,<br>OSBPL3,<br>NRP1, ENAH                   | [Luciferase reporter assay: <b>PUB:22610076</b> ] <b>MCL1</b><br>[Luciferase reporter assay, qRT-PCR, Western blot, Reporter assay, Other: <b>PUB:20162574</b> , Immunoblot, Western blot: <b>PUB:21958558</b> , Western blot: <b>PUB:22209977</b> , Luciferase reporter assay: <b>PUB:22285729</b> , Luciferase reporter assay: <b>PUB:22610076</b> , Western blot: <b>PUB:24002437</b> , Western blot: <b>PUB:24335172</b> ] <b>BCL2</b><br>[HITS-CLIP: <b>PUB:22473208</b> ] <b>FNDC3B</b><br>[HITS-CLIP: <b>PUB:22473208</b> ] <b>OSBPL3</b><br>[Microarray: <b>PUB:17612493</b> , Sequencing: <b>PUB:20371350</b> ] <b>NRP1</b><br>[Microarray: <b>PUB:17612493</b> ] <b>ENAH</b> |
| hsa-miR-182-5p  | BCL2, THBS1            |                                                    | [Flow, Luciferase reporter assay, qRT-PCR, Western blot: <b>PUB:22848417</b> , qRT-PCR: <b>PUB:23936432</b> ] <b>BCL2</b><br>[Luciferase reporter assay: <b>PUB:24053448</b> ] <b>THBS1</b>                                                                                                                                                                                                                                                                                                                                                                                                                                                                                            |
| hsa-miR-183-5p  |                        | SLC2A3,<br>CCND1                                   | [CLASH: <b>PUB:23622248</b> ] <b>SLC2A3</b><br>[Sequencing: <b>PUB:20371350</b> , PAR-CLIP: <b>PUB:23592263</b> ] <b>CCND1</b>                                                                                                                                                                                                                                                                                                                                                                                                                                                                                                                                                         |
| hsa-miR-18a-5p  | BCL2                   | PAFAH1B1,<br>CCND1, F3                             | [Luciferase reporter assay, qRT-PCR, Western blot: <b>PUB:24280866</b> ] <b>BCL2</b><br>[Sequencing: <b>PUB:20371350</b> ] <b>PAFAH1B1</b><br>[PAR-CLIP: <b>PUB:21572407</b> ] <b>CCND1</b><br>[PAR-CLIP: <b>PUB:20371350</b> , PAR-CLIP: <b>PUB:21572407</b> , PAR-CLIP: <b>PUB:23592263</b> ] <b>F3</b>                                                                                                                                                                                                                                                                                                                                                                              |
| hsa-miR-18b-5p  |                        | CCND1, F3                                          | [PAR-CLIP: <b>PUB:21572407</b> ] <b>CCND1</b><br>[PAR-CLIP: <b>PUB:20371350</b> , PAR-CLIP: <b>PUB:21572407</b> , PAR-CLIP: <b>PUB:23592263</b> ] <b>F3</b>                                                                                                                                                                                                                                                                                                                                                                                                                                                                                                                            |
| hsa-miR-192-5p  | BCL2                   | SPRY4,<br>PAFAH1B1,<br>FNDC3B,<br>EFNB2            | [Luciferase reporter assay, qRT-PCR, Reporter assay, Microarray, Other: <b>PUB:19074876</b> ] <b>BCL2</b><br>[Microarray: <b>PUB:19074876</b> ] <b>SPRY4</b><br>[Microarray: <b>PUB:19074876</b> ] <b>PAFAH1B1</b><br>[Microarray: <b>PUB:19074876</b> ] <b>FNDC3B</b><br>[Microarray: <b>PUB:19074876</b> ] <b>EFNB2</b>                                                                                                                                                                                                                                                                                                                                                              |
| hsa-miR-195-5p  | SLC2A3,<br>BCL2, CCND1 | RAD23B,<br>CPEB2,<br>PAFAH1B1,<br>OSBPL3,<br>EFNB2 | [Luciferase reporter assay, Western blot: <b>PUB:22265971</b> , PAR-CLIP: <b>PUB:21572407</b> , PAR-CLIP: <b>PUB:23446348</b> ] <b>SLC2A3</b><br>[Luciferase reporter assay, qRT-PCR, Western blot: <b>PUB:20727858</b> , Immunohistochemistry, Western blot: <b>PUB:23451060</b> , HITS-CLIP: <b>PUB:22473208</b> ] <b>BCL2</b>                                                                                                                                                                                                                                                                                                                                                       |

| miRNA ID       | Strong evidence         | Weak Evidence                            | Evidence Type                                                                                                                                                                                                                                                                                                                                                                                                                                                                                                                                                                                                                                                                                                                                                                                                                                                                                                                                                                                                                                                                                                                                                                                                                                                  |
|----------------|-------------------------|------------------------------------------|----------------------------------------------------------------------------------------------------------------------------------------------------------------------------------------------------------------------------------------------------------------------------------------------------------------------------------------------------------------------------------------------------------------------------------------------------------------------------------------------------------------------------------------------------------------------------------------------------------------------------------------------------------------------------------------------------------------------------------------------------------------------------------------------------------------------------------------------------------------------------------------------------------------------------------------------------------------------------------------------------------------------------------------------------------------------------------------------------------------------------------------------------------------------------------------------------------------------------------------------------------------|
|                |                         |                                          | [Luciferase reporter assay, Western blot: <b>PUB:22217655</b> , Luciferase reporter assay: <b>PUB:23383003</b> , Immunohistochemistry, qRT-PCR, Western blot: <b>PUB:23451060</b> , Western blot: <b>PUB:24402230</b> , PAR-CLIP: <b>PUB:24398324</b> ] <b>CCND1</b><br>[PAR-CLIP: <b>PUB:20371350</b> , HITS-CLIP: <b>PUB:22473208</b> ] <b>RAD23B</b><br>[HITS-CLIP: <b>PUB:22473208</b> ] <b>CPEB2</b><br>[HITS-CLIP: <b>PUB:22473208</b> ] <b>PAFAH1B1</b><br>[PAR-CLIP: <b>PUB:20371350</b> ] <b>OSBPL3</b><br>[PAR-CLIP: <b>PUB:20371350</b> , PAR-CLIP: <b>PUB:22012620</b> ] <b>EFNB2</b>                                                                                                                                                                                                                                                                                                                                                                                                                                                                                                                                                                                                                                                              |
| hsa-miR-19b-3p | MXD1                    | ACVR1, THBS1                             | [Luciferase reporter assay, qRT-PCR, Western blot: <b>PUB:24675462</b> ] <b>MXD1</b><br>[Sequencing: <b>PUB:20371350</b> ] <b>ACVR1</b><br>[PAR-CLIP: <b>PUB:23592263</b> ] <b>THBS1</b>                                                                                                                                                                                                                                                                                                                                                                                                                                                                                                                                                                                                                                                                                                                                                                                                                                                                                                                                                                                                                                                                       |
| hsa-miR-20a-5p | MCL1, BCL2, CCND1, ETV1 | LPHN3, PAFAH1B1, NFAT5, F3, THBS1, ABCA1 | [Immunohistochemistry, Luciferase reporter assay, qRT-PCR, Western blot: <b>PUB:23594563</b> , HITS-CLIP: <b>PUB:22473208</b> ] <b>MCL1</b><br>[Luciferase reporter assay: <b>PUB:19666108</b> ] <b>BCL2</b><br>[Luciferase reporter assay, qRT-PCR, Western blot: <b>PUB:18695042</b> , Luciferase reporter assay: <b>PUB:21283765</b> , Western blot: <b>PUB:23836497</b> , PAR-CLIP: <b>PUB:20371350</b> , PAR-CLIP, HITS-CLIP: <b>PUB:21572407</b> , PAR-CLIP: <b>PUB:22012620</b> , PAR-CLIP: <b>PUB:23446348</b> , PAR-CLIP: <b>PUB:23592263</b> , PAR-CLIP: <b>PUB:24398324</b> ] <b>CCND1</b><br>[Luciferase reporter assay, qRT-PCR, microarray, Western blotting: <b>PUB:23969726</b> ] <b>ETV1</b><br>[CLASH: <b>PUB:23622248</b> ] <b>LPHN3</b><br>[HITS-CLIP: <b>PUB:22473208</b> ] <b>PAFAH1B1</b><br>[PAR-CLIP: <b>PUB:20371350</b> , PAR-CLIP: <b>PUB:21572407</b> , HITS-CLIP: <b>PUB:22473208</b> , PAR-CLIP: <b>PUB:23446348</b> , PAR-CLIP: <b>PUB:23592263</b> ] <b>NFAT5</b><br>[PAR-CLIP: <b>PUB:20371350</b> , PAR-CLIP: <b>PUB:21572407</b> , PAR-CLIP: <b>PUB:23446348</b> , PAR-CLIP: <b>PUB:23592263</b> ] <b>F3</b><br>[Microarray, qRT-PCR: <b>PUB:20940405</b> ] <b>THBS1</b><br>[HITS-CLIP: <b>PUB:22473208</b> ] <b>ABCA1</b> |
| hsa-miR-221-3p |                         |                                          |                                                                                                                                                                                                                                                                                                                                                                                                                                                                                                                                                                                                                                                                                                                                                                                                                                                                                                                                                                                                                                                                                                                                                                                                                                                                |
| hsa-miR-222-3p |                         |                                          |                                                                                                                                                                                                                                                                                                                                                                                                                                                                                                                                                                                                                                                                                                                                                                                                                                                                                                                                                                                                                                                                                                                                                                                                                                                                |
| hsa-miR-24-3p  | CCND1                   | NFAT5, SLC2A3                            | [Luciferase reporter assay, Microarray, qRT-PCR, Western blot: <b>PUB:23174883</b> ] <b>CCND1</b><br>[qRT-PCR: <b>PUB:19296935</b> , Microarray: <b>PUB:19748357</b> ] <b>NFAT5</b><br>[Microarray: <b>PUB:19748357</b> ] <b>SLC2A3</b>                                                                                                                                                                                                                                                                                                                                                                                                                                                                                                                                                                                                                                                                                                                                                                                                                                                                                                                                                                                                                        |

| <b>miRNA ID</b> | <b>Strong evidence</b> | <b>Weak Evidence</b>                                             | <b>Evidence Type</b>                                                                                                                                                                                                                                                                                                                                                                                                                                                                                                                                                                                                                                                                |
|-----------------|------------------------|------------------------------------------------------------------|-------------------------------------------------------------------------------------------------------------------------------------------------------------------------------------------------------------------------------------------------------------------------------------------------------------------------------------------------------------------------------------------------------------------------------------------------------------------------------------------------------------------------------------------------------------------------------------------------------------------------------------------------------------------------------------|
| hsa-miR-25-3p   |                        | FNDC3B, GFPT2                                                    | [CLASH:PUB:23622248] <b>FNDC3B</b><br>[PAR-CLIP:PUB:21572407, PAR-CLIP:PUB:22012620] <b>GFPT2</b>                                                                                                                                                                                                                                                                                                                                                                                                                                                                                                                                                                                   |
| hsa-miR-27b-3p  | THBS1, ABCA1           | RYBP                                                             | [Luciferase reporter assay:PUB:24177325] <b>THBS1</b><br>[Luciferase reporter assay, qRT-PCR, Western blot:PUB:24608080] <b>ABCA1</b><br>[HITS-CLIP:PUB:22473208] <b>RYBP</b>                                                                                                                                                                                                                                                                                                                                                                                                                                                                                                       |
| hsa-miR-30a-5p  |                        | PTPRK, TMEM87A, RAD23B, FNDC3B, NFAT5, BCL2L1, RND3, THBS1       | [pSILAC, Proteomics, Other:PUB:18668040] <b>PTPRK</b><br>[pSILAC, Proteomics, Other:PUB:18668040] <b>TMEM87A</b><br>[pSILAC, Proteomics, Other:PUB:18668040, HITS-CLIP:PUB:22473208] <b>RAD23B</b><br>[Proteomics:PUB:18668040] <b>FNDC3B</b><br>[HITS-CLIP:PUB:22473208] <b>NFAT5</b><br>[Proteomics:PUB:18668040] <b>BCL2L1</b><br>[Proteomics:PUB:18668040] <b>RND3</b><br>[Proteomics:PUB:18668040] <b>THBS1</b>                                                                                                                                                                                                                                                                |
| hsa-miR-30b-5p  | BCL2                   | RAD23B, NFAT5, GFPT2                                             | [Luciferase reporter assay:PUB:24178239] <b>BCL2</b><br>[HITS-CLIP:PUB:22473208] <b>RAD23B</b><br>[HITS-CLIP:PUB:22473208] <b>NFAT5</b><br>[Sequencing:PUB:20371350] <b>GFPT2</b>                                                                                                                                                                                                                                                                                                                                                                                                                                                                                                   |
| hsa-miR-30c-5p  |                        | RAD23B, NFAT5                                                    | [HITS-CLIP:PUB:22473208] <b>RAD23B</b><br>[HITS-CLIP:PUB:22473208] <b>NFAT5</b>                                                                                                                                                                                                                                                                                                                                                                                                                                                                                                                                                                                                     |
| hsa-miR-30e-5p  |                        | RAD23B, NFAT5                                                    | [HITS-CLIP:PUB:22473208] <b>RAD23B</b><br>[HITS-CLIP:PUB:22473208] <b>NFAT5</b>                                                                                                                                                                                                                                                                                                                                                                                                                                                                                                                                                                                                     |
| hsa-miR-342-3p  |                        | RAD23B, FNDC3B, HDAC9                                            | [PAR-CLIP:PUB:22012620] <b>RAD23B</b><br>[HITS-CLIP:PUB:23313552] <b>FNDC3B</b><br>[HITS-CLIP:PUB:23824327] <b>HDAC9</b>                                                                                                                                                                                                                                                                                                                                                                                                                                                                                                                                                            |
| hsa-miR-361-5p  |                        | RAD23B                                                           | [PAR-CLIP:PUB:21572407] <b>RAD23B</b>                                                                                                                                                                                                                                                                                                                                                                                                                                                                                                                                                                                                                                               |
| hsa-miR-454-3p  |                        | ACVR1                                                            | [PAR-CLIP:PUB:21572407] <b>ACVR1</b>                                                                                                                                                                                                                                                                                                                                                                                                                                                                                                                                                                                                                                                |
| hsa-miR-93-5p   |                        | MXD1, PAFAH1B1, RYBP, MCL1, NFAT5, NPAS2, CCND1, RND3, F3, ABCA1 | [Microarray, qRT-PCR:PUB:22815788] <b>MXD1</b><br>[HITS-CLIP:PUB:22473208] <b>PAFAH1B1</b><br>[Sequencing:PUB:20371350] <b>RYBP</b><br>[HITS-CLIP:PUB:22473208] <b>MCL1</b><br>[PAR-CLIP:PUB:20371350, PAR-CLIP:PUB:21572407, HITS-CLIP:PUB:22473208, PAR-CLIP:PUB:23446348, PAR-CLIP:PUB:23592263] <b>NFAT5</b><br>[Microarray, qRT-PCR:PUB:22815788] <b>NPAS2</b><br>[Sequencing, PAR-CLIP:PUB:20371350, PAR-CLIP, HITS-CLIP:PUB:21572407, PAR-CLIP:PUB:22012620, PAR-CLIP:PUB:23446348, PAR-CLIP:PUB:23592263, PAR-CLIP:PUB:24398324] <b>CCND1</b><br>[Sequencing:PUB:20371350] <b>RND3</b><br>[Sequencing, PAR-CLIP:PUB:20371350, PAR-CLIP:PUB:21572407, PAR-CLIP:PUB:23446348, |

| miRNA ID | Strong evidence | Weak Evidence | Evidence Type                                                                               |
|----------|-----------------|---------------|---------------------------------------------------------------------------------------------|
|          |                 |               | PAR-CLIP: <b>PUB:23592263</b> ] <b>F3</b><br>[HITS-CLIP: <b>PUB:22473208</b> ] <b>ABCA1</b> |

Showing 1 to 35 of 35 entries

First

Previous

1

Next

Last
